# Supplementary material
Source: publisher figshare collection journal article supplement (https://acs.figshare.com/ndownloader/files/3823177)
Supplement: Supplementary file 1 [file 3823177]

data_global

# 1. SUBMISSION DETAILS

_publ_contact_author_name          'Garc\'ia, Juventino J.'
_publ_contact_author_address
;     Facultad de Qu\'imica,
      Universidad Nacional Aut\'onoma de M\'exico
      Coyoac\'an 04510
      M\'exico, D.F.
;
_publ_contact_author_phone        '52(5)6223514'
_publ_contact_author_fax          '?'
_publ_contact_author_email        juvent@unam.mx

_publ_requested_journal           'ACS Catalysis'
_publ_requested_category          ?
_publ_requested_coeditor_name     ?
_publ_contact_letter
;
Mexico D.F, 2014-12-08
Please consider this CIF submission for a possible publication in
ACS Catalysis.
This file was checked using the last release of the check procedure of
Acta Cryst.

Thanks
;

#============================================================================

# 2. PROCESSING SUMMARY (IUCr Office Use Only)

_journal_data_validation_number   ?

_journal_date_recd_electronic     ?
_journal_date_to_coeditor         ?
_journal_date_from_coeditor       ?
_journal_date_accepted            ?
_journal_date_printers_first      ?
_journal_date_printers_final      ?
_journal_date_proofs_out          ?
_journal_date_proofs_in           ?
_journal_coeditor_name            ?
_journal_coeditor_code            ?
_journal_coeditor_notes           ?
_journal_techeditor_code          ?
_iucr_compatibility_tag           ?
_journal_techeditor_notes         ?
_journal_coden_ASTM               ?
_journal_name_full                ?
_journal_year                     ?
_journal_volume                   ?
_journal_issue                    ?
_journal_page_first               ?
_journal_page_last                ?
_journal_paper_category           ?
_journal_suppl_publ_number        ?
_journal_suppl_publ_pages         ?

#============================================================================

# 3. TITLE AND AUTHOR LIST

_publ_section_title
;
Hydrogenation of Biomass-Derived Levulinic Acid into 
\g-ValerolactoneCatalyzed by Palladium Complexes
;
_publ_section_title_footnote
; Alternative name for ?
;

loop_
 _publ_author_name
 _publ_author_address

    
      'Ortiz-Cervantes, Carmen'
;     Facultad de Qu\'imica, 
      Universidad Nacional Aut\'onoma de M\'exico
      Cd. Universitaria, Coyoac\'an 04510
      M\'exico, D.F., M\'exico.
;

      'Flores-Alamo, Marcos'
;     Facultad de Qu\'imica, 
      Universidad Nacional Aut\'onoma de M\'exico
      Cd. Universitaria, Coyoac\'an 04510
      M\'exico, D.F., M\'exico.
;

      'Garc\'ia, Juventino J.'
;     Facultad de Qu\'imica, 
      Universidad Nacional Aut\'onoma de M\'exico
      Cd. Universitaria, Coyoac\'an 04510
      M\'exico, D.F., M\'exico.
;


#============================================================================
 
#SUBMISSION INFORMATION
#
#     For a journal send the form to the address specified by the journal
#
#     For a private communication to the CCDC send the form to the address
#       deposit@ccdc.cam.ac.uk
#
#     For up-to-date information on deposition procedures, check the website
#       http://www.ccdc.cam.ac.uk/
 
#------------------  SECTION 2. COMPOUND(S) DETAILS -------------------------#

#\#CIF_1.1
 
#  CIF produced by WinGX routine CIF_UPDATE
#  Created on 2014-12-07 at 19:59:49
#  Using CIFtbx version 3.0.4  1 Sep 2006
 
#  Dictionary name : cif_core.dic
#  Dictionary vers : 2.4.3
#  Request file    : c:\wingx\files\archive.reqdat
#  CIF files read  : co-175-at2b project
 

#------------------  SECTION 2. COMPOUND(S) DETAILS -------------------------#
 
data_1-co-175-at2b
 
_audit_creation_date                    2014-12-07T19:59:49-00:00
_audit_creation_method                  'WinGX routine CIF_UPDATE'
_audit_conform_dict_name                cif_core.dic
_audit_conform_dict_version             2.4.3
_audit_conform_dict_location            ftp://ftp.iucr.org/pub/cif_core.dic
_publ_requested_category                FM
 
#----------------------------------------------------------------------------#
#                   CHEMICAL INFORMATION                                     #
#----------------------------------------------------------------------------#
 
_chemical_name_systematic
;
 ?
;
_chemical_formula_moiety                'C18 H40 Cl2 P2 Pd'
_chemical_formula_sum                   'C18 H40 Cl2 P2 Pd'
_chemical_formula_weight                495.74
 
#----------------------------------------------------------------------------#
#                   UNIT CELL INFORMATION                                    #
#----------------------------------------------------------------------------#
 
_symmetry_cell_setting                  monoclinic
_symmetry_space_group_name_H-M          'P 21/n'
_symmetry_space_group_name_Hall         '-P 2yn'
_symmetry_Int_Tables_number             14
loop_
    _symmetry_equiv_pos_as_xyz
'x, y, z'
'-x+1/2, y+1/2, -z+1/2'
'-x, -y, -z'
'x-1/2, -y-1/2, z-1/2'
 
_cell_length_a                          11.0933(6)
_cell_length_b                          15.2760(6)
_cell_length_c                          14.5257(7)
_cell_angle_alpha                       90
_cell_angle_beta                        109.661(6)
_cell_angle_gamma                       90
_cell_volume                            2318.0(2)
_cell_formula_units_Z                   4
_cell_measurement_temperature           130(2)
_cell_measurement_reflns_used           3895
_cell_measurement_theta_min             3.6702
_cell_measurement_theta_max             25.9979
 
#----------------------------------------------------------------------------#
#                   CRYSTAL INFORMATION                                      #
#----------------------------------------------------------------------------#
 

_exptl_crystal_description              prism
_exptl_crystal_colour                   'pale yellow'
_exptl_crystal_size_max                 0.53
_exptl_crystal_size_mid                 0.25
_exptl_crystal_size_min                 0.21
_exptl_crystal_density_diffrn           1.421
_exptl_crystal_F_000                    1032
loop_
    _exptl_crystal_face_index_h
    _exptl_crystal_face_index_k
    _exptl_crystal_face_index_l
    _exptl_crystal_face_perp_dist
7 -1 15 0.1031
-7 1 -15 0.1031
3 -21 -5 0.2032
-3 21 5 0.2032
14 -2 -14 0.1241
-14 2 14 0.1241
 
_exptl_special_details
;
 ?
;
 
#----------------------------------------------------------------------------#
#                   ABSORPTION CORRECTION                                    #
#----------------------------------------------------------------------------#
 
_exptl_absorpt_coefficient_mu           1.168
_exptl_absorpt_correction_type          analytical
_exptl_absorpt_process_details
;
        CrysAlisPro, Agilent Technologies,
        Version 1.171.35.19 (release 27-10-2011 CrysAlis171 .NET)
        (compiled Oct 27 2011,15:02:11)
Analytical numeric absorption correction using a multifaceted crystal
                        model based on expressions derived by R.C. Clark & J.S.
        (Clark, R. C. & Reid, J. S. (1995). Acta Cryst. A51, 887-897)
;
_exptl_absorpt_correction_T_min         0.517
_exptl_absorpt_correction_T_max         0.647
_shelx_estimated_absorpt_T_min          0.576
_shelx_estimated_absorpt_T_max          0.792
 
#----------------------------------------------------------------------------#
#                   DATA COLLECTION                                          #
#----------------------------------------------------------------------------#
 
_diffrn_ambient_temperature             130(2)
_diffrn_radiation_wavelength            0.71073
_diffrn_radiation_type                  MoK\a
_diffrn_radiation_monochromator         graphite
_diffrn_detector_area_resol_mean        10.4685
_diffrn_orient_matrix_ub_11             -0.0051358
_diffrn_orient_matrix_ub_12             -0.0098429
_diffrn_orient_matrix_ub_13             0.0462748
_diffrn_orient_matrix_ub_21             -0.0671079
_diffrn_orient_matrix_ub_22             -0.0052051
_diffrn_orient_matrix_ub_23             -0.0221339
_diffrn_orient_matrix_ub_31             0.0088823
_diffrn_orient_matrix_ub_32             -0.0450733
_diffrn_orient_matrix_ub_33             -0.0075372
_diffrn_measurement_device_type         'Xcalibur, Atlas, Gemini'
_diffrn_measurement_method              '\w scans'
_diffrn_reflns_av_R_equivalents         0.0311
_diffrn_reflns_av_unetI/netI            0.0846
_diffrn_reflns_number                   9964
_diffrn_reflns_limit_h_min              -13
_diffrn_reflns_limit_h_max              13
_diffrn_reflns_limit_k_min              -14
_diffrn_reflns_limit_k_max              18
_diffrn_reflns_limit_l_min              -11
_diffrn_reflns_limit_l_max              17
_diffrn_reflns_theta_min                3.885
_diffrn_reflns_theta_max                26.054
_diffrn_reflns_theta_full               25.242
_diffrn_measured_fraction_theta_full
                                        0.997
_diffrn_measured_fraction_theta_max
                                        0.997
_diffrn_reflns_Laue_measured_fraction_full
                                        0.997
_diffrn_reflns_Laue_measured_fraction_max
                                        0.997
_diffrn_reflns_point_group_measured_fraction_full
                                        0.997
_diffrn_reflns_point_group_measured_fraction_max
                                        0.997
_reflns_Friedel_coverage                0
_reflns_number_total                    4571
_reflns_number_gt                       3870
_reflns_threshold_expression            'I > 2\s(I)'
 
#----------------------------------------------------------------------------#
#                   COMPUTER PROGRAMS USED                                   #
#----------------------------------------------------------------------------#
 
_computing_data_collection
;
        CrysAlisPro, Agilent Technologies,
        Version 1.171.35.19 (release 27-10-2011 CrysAlis171 .NET)
        (compiled Oct 27 2011,15:02:11)
;
_computing_cell_refinement
;
        CrysAlisPro, Agilent Technologies,
        Version 1.171.35.19 (release 27-10-2011 CrysAlis171 .NET)
        (compiled Oct 27 2011,15:02:11)
;
_computing_data_reduction
;
        CrysAlisPro, Agilent Technologies,
        Version 1.171.35.19 (release 27-10-2011 CrysAlis171 .NET)
        (compiled Oct 27 2011,15:02:11)
;
_computing_structure_refinement         'SHELXL-2013 (Sheldrick, 2013)'
 
#----------------------------------------------------------------------------#
#                   STRUCTURE SOLUTION                                       #
#----------------------------------------------------------------------------#
 
_atom_sites_solution_hydrogens          geom
 
#----------------------------------------------------------------------------#
#                   REFINEMENT INFORMATION                                   #
#----------------------------------------------------------------------------#
 
_refine_special_details
;
 ?
;
_refine_ls_structure_factor_coef        Fsqd
_refine_ls_matrix_type                  full
_refine_ls_weighting_scheme             calc
_refine_ls_weighting_details
              'w=1/[\s^2^(Fo^2^)+(0.0181P)^2^+1.5603P] where P=(Fo^2^+2Fc^2^)/3'
_refine_ls_hydrogen_treatment           constr
_refine_ls_extinction_method            SHELXL
_refine_ls_extinction_expression
                                    Fc^*^=kFc[1+0.001xFc^2^\l^3^/sin(2\q)]^-1/4^
_refine_ls_extinction_coef              0.0012(3)
_refine_ls_number_reflns                4571
_refine_ls_number_parameters            221
_refine_ls_number_restraints            0
_refine_ls_R_factor_all                 0.0426
_refine_ls_R_factor_gt                  0.0323
_refine_ls_wR_factor_ref                0.0706
_refine_ls_wR_factor_gt                 0.0658
_refine_ls_goodness_of_fit_ref          1.116
_refine_ls_restrained_S_all             1.116
_refine_ls_shift/su_max                 0.001
_refine_ls_shift/su_mean                0
_refine_diff_density_max                0.46
_refine_diff_density_min                -0.381
_refine_diff_density_rms                0.083
 
#----------------------------------------------------------------------------#
#                   CONSTRAINTS AND RESTRAINTS                               #
#----------------------------------------------------------------------------#
 
 
#----------------------------------------------------------------------------#
#                   ATOMIC TYPES, COORDINATES AND THERMAL PARAMETERS         #
#----------------------------------------------------------------------------#
 
loop_
    _atom_type_symbol
    _atom_type_description
    _atom_type_scat_dispersion_real
    _atom_type_scat_dispersion_imag
    _atom_type_scat_source
C C 0.0033 0.0016 'International Tables Vol C Tables 4.2.6.8 and 6.1.1.4'
H H 0 0 'International Tables Vol C Tables 4.2.6.8 and 6.1.1.4'
Pd Pd -0.9988 1.0072 'International Tables Vol C Tables 4.2.6.8 and 6.1.1.4'
P P 0.1023 0.0942 'International Tables Vol C Tables 4.2.6.8 and 6.1.1.4'
Cl Cl 0.1484 0.1585 'International Tables Vol C Tables 4.2.6.8 and 6.1.1.4'
 
loop_
    _atom_site_label
    _atom_site_type_symbol
    _atom_site_fract_x
    _atom_site_fract_y
    _atom_site_fract_z
    _atom_site_U_iso_or_equiv
    _atom_site_adp_type
    _atom_site_occupancy
    _atom_site_site_symmetry_order
    _atom_site_calc_flag
    _atom_site_refinement_flags_posn
    _atom_site_refinement_flags_adp
    _atom_site_refinement_flags_occupancy
    _atom_site_disorder_assembly
    _atom_site_disorder_group
Pd1 Pd 0.23161(2) 0.79192(2) 0.21867(2) 0.01483(9) Uani 1 1 d . . . . .
P2 P 0.40122(7) 0.88442(5) 0.25518(5) 0.01611(17) Uani 1 1 d . . . . .
P1 P 0.13743(7) 0.88250(5) 0.29838(6) 0.01728(17) Uani 1 1 d . . . . .
Cl1 Cl 0.32918(7) 0.69804(5) 0.13454(6) 0.02563(18) Uani 1 1 d . . . . .
Cl2 Cl 0.05568(7) 0.69643(5) 0.18425(6) 0.02601(18) Uani 1 1 d . . . . .
C7 C 0.0927(3) 0.82996(19) 0.4011(2) 0.0230(7) Uani 1 1 d . . . . .
C11 C 0.5486(3) 0.8428(2) 0.3524(2) 0.0240(7) Uani 1 1 d . . . . .
C15 C 0.4419(3) 0.92759(19) 0.1470(2) 0.0223(7) Uani 1 1 d . . . . .
C1 C 0.2591(3) 0.96406(18) 0.3617(2) 0.0217(7) Uani 1 1 d . . . . .
H1A H 0.2159 1.0192 0.3685 0.026 Uiso 1 1 calc R U . . .
H1B H 0.3075 0.9425 0.4282 0.026 Uiso 1 1 calc R U . . .
C3 C -0.0009(3) 0.94757(19) 0.2151(2) 0.0267(7) Uani 1 1 d . . . . .
C9 C -0.0397(3) 0.7861(2) 0.3648(3) 0.0281(7) Uani 1 1 d . . . . .
H9A H -0.1057 0.8308 0.3384 0.042 Uiso 1 1 calc R U . . .
H9B H -0.055 0.7559 0.4193 0.042 Uiso 1 1 calc R U . . .
H9C H -0.0427 0.7437 0.3134 0.042 Uiso 1 1 calc R U . . .
C2 C 0.3527(3) 0.98279(19) 0.3071(2) 0.0214(7) Uani 1 1 d . . . . .
H2A H 0.4301 1.0111 0.3526 0.026 Uiso 1 1 calc R U . . .
H2B H 0.3124 1.0247 0.2535 0.026 Uiso 1 1 calc R U . . .
C10 C 0.1932(3) 0.7593(2) 0.4475(2) 0.0302(8) Uani 1 1 d . . . . .
H10A H 0.1975 0.7182 0.397 0.045 Uiso 1 1 calc R U . . .
H10B H 0.1692 0.7278 0.4976 0.045 Uiso 1 1 calc R U . . .
H10C H 0.277 0.787 0.4777 0.045 Uiso 1 1 calc R U . . .
C8 C 0.0947(4) 0.8967(2) 0.4807(3) 0.0379(9) Uani 1 1 d . . . . .
H8A H 0.1818 0.9194 0.5108 0.057 Uiso 1 1 calc R U . . .
H8B H 0.0671 0.8682 0.5307 0.057 Uiso 1 1 calc R U . . .
H8C H 0.0365 0.9451 0.4514 0.057 Uiso 1 1 calc R U . . .
C17 C 0.5041(4) 1.0189(2) 0.1670(3) 0.0348(8) Uani 1 1 d . . . . .
H17A H 0.4443 1.0605 0.1798 0.052 Uiso 1 1 calc R U . . .
H17B H 0.525 1.0384 0.1098 0.052 Uiso 1 1 calc R U . . .
H17C H 0.5826 1.0161 0.224 0.052 Uiso 1 1 calc R U . . .
C4 C 0.0520(3) 1.0093(2) 0.1546(3) 0.0311(8) Uani 1 1 d . . . . .
H4A H 0.1103 1.0516 0.1981 0.047 Uiso 1 1 calc R U . . .
H4B H -0.0189 1.0405 0.1069 0.047 Uiso 1 1 calc R U . . .
H4C H 0.0985 0.9751 0.1202 0.047 Uiso 1 1 calc R U . . .
C5 C -0.0666(3) 1.0045(2) 0.2713(3) 0.0353(9) Uani 1 1 d . . . . .
H5A H -0.1063 0.9668 0.3076 0.053 Uiso 1 1 calc R U . . .
H5B H -0.1325 1.0407 0.2251 0.053 Uiso 1 1 calc R U . . .
H5C H -0.0029 1.0424 0.3171 0.053 Uiso 1 1 calc R U . . .
C12 C 0.5136(3) 0.8302(3) 0.4444(3) 0.0448(10) Uani 1 1 d . . . . .
H12A H 0.4911 0.8869 0.4658 0.067 Uiso 1 1 calc R U . . .
H12B H 0.5868 0.8053 0.4962 0.067 Uiso 1 1 calc R U . . .
H12C H 0.4404 0.7903 0.4303 0.067 Uiso 1 1 calc R U . . .
C6 C -0.0993(3) 0.8879(2) 0.1431(3) 0.0372(9) Uani 1 1 d . . . . .
H6A H -0.0582 0.856 0.1031 0.056 Uiso 1 1 calc R U . . .
H6B H -0.1697 0.9234 0.1006 0.056 Uiso 1 1 calc R U . . .
H6C H -0.1329 0.846 0.1794 0.056 Uiso 1 1 calc R U . . .
C13 C 0.6589(3) 0.9097(2) 0.3772(3) 0.0330(8) Uani 1 1 d . . . . .
H13A H 0.6907 0.9143 0.322 0.05 Uiso 1 1 calc R U . . .
H13B H 0.7284 0.8902 0.4355 0.05 Uiso 1 1 calc R U . . .
H13C H 0.6278 0.967 0.3897 0.05 Uiso 1 1 calc R U . . .
C14 C 0.5948(3) 0.7550(2) 0.3270(3) 0.0352(9) Uani 1 1 d . . . . .
H14A H 0.5256 0.7119 0.3137 0.053 Uiso 1 1 calc R U . . .
H14B H 0.6685 0.735 0.382 0.053 Uiso 1 1 calc R U . . .
H14C H 0.6201 0.7618 0.2689 0.053 Uiso 1 1 calc R U . . .
C16 C 0.5333(3) 0.8668(2) 0.1180(2) 0.0303(8) Uani 1 1 d . . . . .
H16A H 0.6172 0.8668 0.1697 0.045 Uiso 1 1 calc R U . . .
H16B H 0.5426 0.8875 0.0569 0.045 Uiso 1 1 calc R U . . .
H16C H 0.4985 0.8072 0.1088 0.045 Uiso 1 1 calc R U . . .
C18 C 0.3172(3) 0.9344(2) 0.0600(2) 0.0355(8) Uani 1 1 d . . . . .
H18A H 0.2748 0.8771 0.0479 0.053 Uiso 1 1 calc R U . . .
H18B H 0.3363 0.9529 0.0018 0.053 Uiso 1 1 calc R U . . .
H18C H 0.2606 0.9773 0.0747 0.053 Uiso 1 1 calc R U . . .
 
loop_
    _atom_site_aniso_label
    _atom_site_aniso_U_11
    _atom_site_aniso_U_22
    _atom_site_aniso_U_33
    _atom_site_aniso_U_23
    _atom_site_aniso_U_13
    _atom_site_aniso_U_12
Pd1 0.01723(13) 0.01189(12) 0.01457(13) -0.00078(9) 0.00433(9) 0.00103(9)
P2 0.0179(4) 0.0162(4) 0.0152(4) -0.0004(3) 0.0068(3) -0.0004(3)
P1 0.0192(4) 0.0144(4) 0.0201(4) -0.0017(3) 0.0092(3) -0.0006(3)
Cl1 0.0213(4) 0.0224(4) 0.0316(4) -0.0107(3) 0.0068(3) 0.0029(3)
Cl2 0.0298(4) 0.0186(3) 0.0323(5) -0.0060(3) 0.0141(3) -0.0077(3)
C7 0.0257(17) 0.0243(15) 0.0244(17) -0.0007(13) 0.0154(14) -0.0029(14)
C11 0.0162(15) 0.0343(17) 0.0183(16) 0.0047(14) 0.0016(12) -0.0013(14)
C15 0.0297(17) 0.0237(15) 0.0176(16) 0.0042(13) 0.0133(13) 0.0040(14)
C1 0.0278(17) 0.0185(14) 0.0230(17) -0.0049(13) 0.0141(13) -0.0020(13)
C3 0.0220(17) 0.0209(15) 0.037(2) 0.0050(14) 0.0103(14) 0.0048(13)
C9 0.0291(18) 0.0250(16) 0.036(2) 0.0015(14) 0.0186(15) -0.0022(14)
C2 0.0258(17) 0.0188(14) 0.0221(17) -0.0041(13) 0.0113(13) -0.0046(13)
C10 0.0299(18) 0.0373(18) 0.0252(19) 0.0105(15) 0.0118(15) -0.0033(16)
C8 0.050(2) 0.041(2) 0.036(2) -0.0103(17) 0.0315(18) -0.0138(18)
C17 0.053(2) 0.0264(16) 0.039(2) 0.0034(15) 0.0341(18) -0.0035(17)
C4 0.0290(18) 0.0290(17) 0.036(2) 0.0091(15) 0.0125(16) 0.0072(15)
C5 0.0312(19) 0.0226(16) 0.058(3) 0.0020(16) 0.0224(18) 0.0069(15)
C12 0.0228(18) 0.083(3) 0.025(2) 0.018(2) 0.0033(15) 0.0055(19)
C6 0.0257(18) 0.0352(19) 0.041(2) 0.0052(16) -0.0009(16) 0.0061(16)
C13 0.0206(17) 0.040(2) 0.036(2) -0.0083(16) 0.0056(15) -0.0042(15)
C14 0.0249(18) 0.0287(18) 0.042(2) 0.0106(16) -0.0014(16) 0.0046(15)
C16 0.039(2) 0.0323(18) 0.0272(19) 0.0016(15) 0.0205(16) 0.0055(16)
C18 0.039(2) 0.047(2) 0.0244(19) 0.0142(16) 0.0168(16) 0.0106(18)
 
 
#----------------------------------------------------------------------------#
#                   MOLECULAR GEOMETRY                                       #
#----------------------------------------------------------------------------#
 
_geom_special_details
;
 All esds (except the esd in the dihedral angle between two l.s. planes)
 are estimated using the full covariance matrix.  The cell esds are taken
 into account individually in the estimation of esds in distances, angles
 and torsion angles; correlations between esds in cell parameters are only
 used when they are defined by crystal symmetry.  An approximate (isotropic)
 treatment of cell esds is used for estimating esds involving l.s. planes.
;
loop_
    _geom_bond_atom_site_label_1
    _geom_bond_atom_site_label_2
    _geom_bond_distance
    _geom_bond_site_symmetry_2
    _geom_bond_publ_flag
Pd1 P2 2.2687(8) . ?
Pd1 P1 2.2717(8) . ?
Pd1 Cl2 2.3516(8) . ?
Pd1 Cl1 2.3689(8) . ?
P2 C2 1.841(3) . ?
P2 C11 1.875(3) . ?
P2 C15 1.894(3) . ?
P1 C1 1.840(3) . ?
P1 C3 1.886(3) . ?
P1 C7 1.901(3) . ?
C7 C10 1.535(4) . ?
C7 C8 1.536(4) . ?
C7 C9 1.537(4) . ?
C11 C12 1.523(5) . ?
C11 C14 1.525(5) . ?
C11 C13 1.541(4) . ?
C15 C18 1.531(5) . ?
C15 C16 1.535(4) . ?
C15 C17 1.540(4) . ?
C1 C2 1.531(4) . ?
C1 H1A 0.99 . ?
C1 H1B 0.99 . ?
C3 C6 1.533(5) . ?
C3 C4 1.534(4) . ?
C3 C5 1.535(5) . ?
C9 H9A 0.98 . ?
C9 H9B 0.98 . ?
C9 H9C 0.98 . ?
C2 H2A 0.99 . ?
C2 H2B 0.99 . ?
C10 H10A 0.98 . ?
C10 H10B 0.98 . ?
C10 H10C 0.98 . ?
C8 H8A 0.98 . ?
C8 H8B 0.98 . ?
C8 H8C 0.98 . ?
C17 H17A 0.98 . ?
C17 H17B 0.98 . ?
C17 H17C 0.98 . ?
C4 H4A 0.98 . ?
C4 H4B 0.98 . ?
C4 H4C 0.98 . ?
C5 H5A 0.98 . ?
C5 H5B 0.98 . ?
C5 H5C 0.98 . ?
C12 H12A 0.98 . ?
C12 H12B 0.98 . ?
C12 H12C 0.98 . ?
C6 H6A 0.98 . ?
C6 H6B 0.98 . ?
C6 H6C 0.98 . ?
C13 H13A 0.98 . ?
C13 H13B 0.98 . ?
C13 H13C 0.98 . ?
C14 H14A 0.98 . ?
C14 H14B 0.98 . ?
C14 H14C 0.98 . ?
C16 H16A 0.98 . ?
C16 H16B 0.98 . ?
C16 H16C 0.98 . ?
C18 H18A 0.98 . ?
C18 H18B 0.98 . ?
C18 H18C 0.98 . ?
 
loop_
    _geom_angle_atom_site_label_1
    _geom_angle_atom_site_label_2
    _geom_angle_atom_site_label_3
    _geom_angle
    _geom_angle_site_symmetry_1
    _geom_angle_site_symmetry_3
    _geom_angle_publ_flag
P2 Pd1 P1 89.37(3) . . ?
P2 Pd1 Cl2 178.77(3) . . ?
P1 Pd1 Cl2 89.72(3) . . ?
P2 Pd1 Cl1 90.61(3) . . ?
P1 Pd1 Cl1 179.60(3) . . ?
Cl2 Pd1 Cl1 90.30(3) . . ?
C2 P2 C11 105.61(14) . . ?
C2 P2 C15 103.87(13) . . ?
C11 P2 C15 110.63(14) . . ?
C2 P2 Pd1 105.68(10) . . ?
C11 P2 Pd1 114.15(10) . . ?
C15 P2 Pd1 115.69(10) . . ?
C1 P1 C3 105.39(14) . . ?
C1 P1 C7 103.59(14) . . ?
C3 P1 C7 110.80(14) . . ?
C1 P1 Pd1 106.35(10) . . ?
C3 P1 Pd1 114.10(11) . . ?
C7 P1 Pd1 115.42(10) . . ?
C10 C7 C8 108.1(3) . . ?
C10 C7 C9 108.3(2) . . ?
C8 C7 C9 108.6(3) . . ?
C10 C7 P1 107.4(2) . . ?
C8 C7 P1 111.7(2) . . ?
C9 C7 P1 112.7(2) . . ?
C12 C11 C14 107.9(3) . . ?
C12 C11 C13 107.2(3) . . ?
C14 C11 C13 109.5(3) . . ?
C12 C11 P2 106.8(2) . . ?
C14 C11 P2 113.2(2) . . ?
C13 C11 P2 112.0(2) . . ?
C18 C15 C16 108.1(3) . . ?
C18 C15 C17 108.5(3) . . ?
C16 C15 C17 107.7(3) . . ?
C18 C15 P2 107.9(2) . . ?
C16 C15 P2 112.4(2) . . ?
C17 C15 P2 112.1(2) . . ?
C2 C1 P1 112.3(2) . . ?
C2 C1 H1A 109.2 . . ?
P1 C1 H1A 109.2 . . ?
C2 C1 H1B 109.2 . . ?
P1 C1 H1B 109.2 . . ?
H1A C1 H1B 107.9 . . ?
C6 C3 C4 107.3(3) . . ?
C6 C3 C5 110.1(3) . . ?
C4 C3 C5 107.4(3) . . ?
C6 C3 P1 111.3(2) . . ?
C4 C3 P1 107.8(2) . . ?
C5 C3 P1 112.7(2) . . ?
C7 C9 H9A 109.5 . . ?
C7 C9 H9B 109.5 . . ?
H9A C9 H9B 109.5 . . ?
C7 C9 H9C 109.5 . . ?
H9A C9 H9C 109.5 . . ?
H9B C9 H9C 109.5 . . ?
C1 C2 P2 113.7(2) . . ?
C1 C2 H2A 108.8 . . ?
P2 C2 H2A 108.8 . . ?
C1 C2 H2B 108.8 . . ?
P2 C2 H2B 108.8 . . ?
H2A C2 H2B 107.7 . . ?
C7 C10 H10A 109.5 . . ?
C7 C10 H10B 109.5 . . ?
H10A C10 H10B 109.5 . . ?
C7 C10 H10C 109.5 . . ?
H10A C10 H10C 109.5 . . ?
H10B C10 H10C 109.5 . . ?
C7 C8 H8A 109.5 . . ?
C7 C8 H8B 109.5 . . ?
H8A C8 H8B 109.5 . . ?
C7 C8 H8C 109.5 . . ?
H8A C8 H8C 109.5 . . ?
H8B C8 H8C 109.5 . . ?
C15 C17 H17A 109.5 . . ?
C15 C17 H17B 109.5 . . ?
H17A C17 H17B 109.5 . . ?
C15 C17 H17C 109.5 . . ?
H17A C17 H17C 109.5 . . ?
H17B C17 H17C 109.5 . . ?
C3 C4 H4A 109.5 . . ?
C3 C4 H4B 109.5 . . ?
H4A C4 H4B 109.5 . . ?
C3 C4 H4C 109.5 . . ?
H4A C4 H4C 109.5 . . ?
H4B C4 H4C 109.5 . . ?
C3 C5 H5A 109.5 . . ?
C3 C5 H5B 109.5 . . ?
H5A C5 H5B 109.5 . . ?
C3 C5 H5C 109.5 . . ?
H5A C5 H5C 109.5 . . ?
H5B C5 H5C 109.5 . . ?
C11 C12 H12A 109.5 . . ?
C11 C12 H12B 109.5 . . ?
H12A C12 H12B 109.5 . . ?
C11 C12 H12C 109.5 . . ?
H12A C12 H12C 109.5 . . ?
H12B C12 H12C 109.5 . . ?
C3 C6 H6A 109.5 . . ?
C3 C6 H6B 109.5 . . ?
H6A C6 H6B 109.5 . . ?
C3 C6 H6C 109.5 . . ?
H6A C6 H6C 109.5 . . ?
H6B C6 H6C 109.5 . . ?
C11 C13 H13A 109.5 . . ?
C11 C13 H13B 109.5 . . ?
H13A C13 H13B 109.5 . . ?
C11 C13 H13C 109.5 . . ?
H13A C13 H13C 109.5 . . ?
H13B C13 H13C 109.5 . . ?
C11 C14 H14A 109.5 . . ?
C11 C14 H14B 109.5 . . ?
H14A C14 H14B 109.5 . . ?
C11 C14 H14C 109.5 . . ?
H14A C14 H14C 109.5 . . ?
H14B C14 H14C 109.5 . . ?
C15 C16 H16A 109.5 . . ?
C15 C16 H16B 109.5 . . ?
H16A C16 H16B 109.5 . . ?
C15 C16 H16C 109.5 . . ?
H16A C16 H16C 109.5 . . ?
H16B C16 H16C 109.5 . . ?
C15 C18 H18A 109.5 . . ?
C15 C18 H18B 109.5 . . ?
H18A C18 H18B 109.5 . . ?
C15 C18 H18C 109.5 . . ?
H18A C18 H18C 109.5 . . ?
H18B C18 H18C 109.5 . . ?
 
loop_
    _geom_torsion_atom_site_label_1
    _geom_torsion_atom_site_label_2
    _geom_torsion_atom_site_label_3
    _geom_torsion_atom_site_label_4
    _geom_torsion
    _geom_torsion_site_symmetry_1
    _geom_torsion_site_symmetry_2
    _geom_torsion_site_symmetry_3
    _geom_torsion_site_symmetry_4
    _geom_torsion_publ_flag
C2 P2 C11 C12 55.0(3) . . . . ?
C15 P2 C11 C12 166.8(2) . . . . ?
Pd1 P2 C11 C12 -60.7(3) . . . . ?
C2 P2 C11 C14 173.5(2) . . . . ?
C15 P2 C11 C14 -74.7(3) . . . . ?
Pd1 P2 C11 C14 57.9(3) . . . . ?
C2 P2 C11 C13 -62.1(3) . . . . ?
C15 P2 C11 C13 49.7(3) . . . . ?
Pd1 P2 C11 C13 -177.73(19) . . . . ?
C2 P2 C15 C18 -83.9(2) . . . . ?
C11 P2 C15 C18 163.2(2) . . . . ?
Pd1 P2 C15 C18 31.4(2) . . . . ?
C2 P2 C15 C16 157.0(2) . . . . ?
C11 P2 C15 C16 44.1(3) . . . . ?
Pd1 P2 C15 C16 -87.7(2) . . . . ?
C2 P2 C15 C17 35.5(3) . . . . ?
C11 P2 C15 C17 -77.4(3) . . . . ?
Pd1 P2 C15 C17 150.8(2) . . . . ?
C3 P1 C1 C2 -91.0(2) . . . . ?
C7 P1 C1 C2 152.6(2) . . . . ?
Pd1 P1 C1 C2 30.5(2) . . . . ?
C1 P1 C3 C6 169.1(2) . . . . ?
C7 P1 C3 C6 -79.5(3) . . . . ?
Pd1 P1 C3 C6 52.8(3) . . . . ?
C1 P1 C3 C4 51.7(3) . . . . ?
C7 P1 C3 C4 163.1(2) . . . . ?
Pd1 P1 C3 C4 -64.6(2) . . . . ?
C1 P1 C3 C5 -66.6(2) . . . . ?
C7 P1 C3 C5 44.8(3) . . . . ?
Pd1 P1 C3 C5 177.07(18) . . . . ?
P1 C1 C2 P2 -40.6(3) . . . . ?
C11 P2 C2 C1 -90.6(2) . . . . ?
C15 P2 C2 C1 152.9(2) . . . . ?
Pd1 P2 C2 C1 30.7(2) . . . . ?
 
_shelx_hkl_file
;
   0   0  -3-76.1312 259.226   1
   0   0  -4 2067.50 423.071   1
   0   0  -5 59.2101 262.634   1
   0   0  -6 1747.79 480.651   1
   0   0  -7 409.399 401.743   1
   0   0  -8 4322.99 831.705   1
   0   0  -9 48.9162 431.433   1
   0   0  10 241.341 522.503   1
   0   0  11 223.712 664.487   1
   0   0  12 93121.8 4954.38   1
   0   0  13 388.334 716.302   1
   0   0  14 67167.7 4399.90   1
   0   0  15-1284.99 889.487   1
   0   0  16 3423.05 1277.46   1
   0   1  -3 642.390 249.024   1
   0  -1  -3 739.699 257.801   1
   0   1  -4 342962. 9704.32   1
   0  -1  -4 380460. 9751.95   1
   0   1  -5 7408.37 832.005   1
   0  -1  -5 7559.70 823.260   1
   0  -1  -6 72071.0 3180.21   1
   0   1  -6 88459.7 3442.44   1
   0   1  -7 2143.76 559.566   1
   0  -1  -7 2497.87 580.660   1
   0   1  -8 137164. 5307.27   1
   0  -1  -8 140083. 5314.78   1
   0   1  -9-501.836 414.202   1
   0  -1  -9 735.121 524.311   1
   0  -1  10 113810. 5059.54   1
   0   1  10 100862. 4775.05   1
   0  -1  11 3857.27 1052.73   1
   0   1  11 5827.55 1067.29   1
   0   1  12 39034.4 2998.24   1
   0  -1  12 37695.9 3009.64   1
   0   1  13 16470.9 2014.85   1
   0  -1  13 10691.9 1737.47   1
   0   1  14 3174.37 1127.32   1
   0  -1  14 3382.97 1210.32   1
   0   1  15 4111.51 1231.59   1
   0  -1  15 3968.33 1169.30   1
   0   1  16-1763.83 975.587   1
   0  -1  16-579.656 768.190   1
   0   2  -2 118387. 3515.84   1
   0  -2  -2 122620. 3485.01   1
   0  -2  -3 29515.5 1393.08   1
   0   2  -3 32842.7 1502.89   1
   0  -2  -4 30460.5 1560.25   1
   0   2  -4 29646.3 1589.59   1
   0  -2  -5 163451. 5195.91   1
   0   2  -5 157174. 5224.90   1
   0   2  -6 9546.81 1030.75   1
   0  -2  -6 11175.2 1080.48   1
   0  -2  -7 28465.0 1928.60   1
   0   2  -7 34273.1 2135.47   1
   0   2  -8 1009.68 451.036   1
   0  -2  -8 1907.80 545.909   1
   0   2  -9 4193.08 848.227   1
   0   2   9 5135.71 969.888   1
   0  -2  -9 4336.49 914.909   1
   0   2  10 20297.9 1926.89   1
   0  -2  10 19521.6 1954.44   1
   0   2  11 6427.34 1156.92   1
   0  -2  11 9447.85 1487.46   1
   0  -2  12 46464.6 3405.12   1
   0   2  12 57874.1 3646.54   1
   0   2  13 21840.6 2307.41   1
   0  -2  13 20281.5 2314.66   1
   0   2  14 31411.9 2955.07   1
   0  -2  14 29750.4 2895.41   1
   0   2  15 10917.3 1778.51   1
   0  -2  15 8854.69 1641.90   1
   0  -2  16 20821.4 2600.90   1
   0   2  16 17873.4 2421.13   1
   0  -3   0 20.6825 123.813   2
   0   3  -1 191642. 4944.47   2
   0  -3   1 196432. 4954.87   2
   0  -3   2 59632.0 1829.80   2
   0   3  -2 62208.9 1837.34   2
   0   3  -3 25064.0 1334.83   1
   0  -3   3 25502.9 1028.21   2
   0  -3  -3 26203.8 1313.86   1
   0  -3  -4 376460. 10143.5   1
   0   3  -4 376680. 10229.1   1
   0  -3  -5 33494.0 1833.28   1
   0   3  -5 33141.8 1882.39   1
   0   3  -6 172174. 5672.13   1
   0  -3  -6 157411. 5468.40   1
   0  -3  -7 151754. 5293.68   1
   0   3  -7 134483. 5200.38   1
   0   3  -8 145785. 5623.29   1
   0  -3  -8 150961. 5599.79   1
   0   3   8 147264. 5560.55   1
   0   3  -9 138589. 5442.66   1
   0   3   9 116248. 5081.25   1
   0  -3   9 128687. 5395.34   1
   0  -3  -9 128239. 5248.56   1
   0   3  10 97219.2 4598.40   1
   0  -3  10 96291.0 4667.97   1
   0  -3  11 33310.8 2691.18   1
   0   3  11 33348.1 2620.39   1
   0   3  12 3773.92 1098.92   1
   0  -3  12 4828.68 1223.25   1
   0   3  13 13042.2 1826.35   1
   0  -3  13 12864.0 1839.73   1
   0  -3  14 891.474 774.964   1
   0   3  14 574.199 653.397   1
   0   3  15 6047.58 1514.73   1
   0   3  16 2073.51 942.325   1
   0   4   0 95080.4 2831.68   2
   0  -4   0 92244.6 2814.80   2
   0   4  -1 5599.79 434.899   2
   0  -4   1 5889.35 431.493   2
   0  -4   2 82914.6 2422.45   2
   0   4   2 82759.7 2759.79   1
   0   4  -2 84174.3 2422.27   2
   0   4   3 157885. 4915.55   1
   0  -4  -3 173491. 4985.21   1
   0  -4   3 165884. 4458.23   2
   0  -4  -4 411.343 313.682   1
   0   4   4 417.493 295.314   1
   0  -4   4 281.743 175.385   2
   0   4  -4 361.687 276.336   1
   0  -4  -5 185595. 5877.81   1
   0   4  -5 195262. 6054.76   1
   0   4   5 179481. 5832.01   1
   0   4   6 6659.28 896.613   1
   0   4  -6 8194.79 999.128   1
   0  -4  -6 7018.42 898.684   1
   0  -4  -7 23865.2 1795.31   1
   0   4   7 28788.3 1937.61   1
   0   4  -7 25486.9 1870.08   1
   0   4  -8 16244.9 1565.97   1
   0   4   8 15177.4 1498.93   1
   0  -4  -8 15476.9 1494.69   1
   0   4  -9 13568.7 1506.87   1
   0  -4  -9 10478.8 1314.28   1
   0   4   9 10657.0 1335.34   1
   0   4  10 2722.18 842.989   1
   0   4  11 14810.5 1754.32   1
   0   4  12 7548.29 1386.12   1
   0   4  13 16181.2 2091.11   1
   0   4  14 19214.5 2311.61   1
   0   4  15 72227.4 4766.92   1
   0   4  16 23972.7 2782.49   1
   0   5   0 269.616 201.978   2
   0   5   1 28999.9 1423.93   2
   0   5  -1 30147.3 1238.64   2
   0  -5   1 27965.6 1201.29   2
   0   5   2 7109.70 666.929   1
   0  -5   2 7077.05 505.027   2
   0   5  -2 7569.35 524.099   2
   0   5   3 1437.37 394.589   1
   0  -5   3 2225.44 291.914   2
   0  -5  -3 1966.05 411.318   1
   0  -5   4 4806.38 459.892   2
   0  -5  -4 4304.42 605.863   1
   0   5  -4 2900.93 582.824   1
   0   5   4 4197.39 604.299   1
   0  -5  -5 309749. 8767.18   1
   0   5   5 295822. 8700.40   1
   0   5  -5 301692. 8880.15   1
   0  -5   5 298706. 7974.81   2
   0   5   6 49228.6 2530.64   1
   0   5  -6 53750.4 2709.99   1
   0  -5   6 53155.1 2108.78   2
   0  -5  -6 47014.9 2512.43   1
   0   5   7 371683. 11060.1   1
   0   5  -7 365970. 11198.7   1
   0  -5  -7 403557. 11259.7   1
   0  -5  -8 50285.5 2863.08   1
   0   5  -8 55699.9 3046.13   1
   0   5   8 47634.8 2795.92   1
   0   5   9 216591. 7730.30   1
   0  -5  -9 228476. 7845.30   1
   0   5  10 13399.2 1601.35   1
   0   5  11 47257.8 3193.07   1
   0   5  12 8404.91 1434.04   1
   0   5  13 36370.6 3047.75   1
   0   5  14 1055.26 730.593   1
   0   5  15 14322.6 2095.03   1
   0   5  16-219.362 856.014   1
   0   6   0 5461.46 576.849   2
   0   6   1 1224.39 338.170   2
   0   6  -1 1475.71 315.748   2
   0  -6   1 1672.96 318.256   2
   0   6  -2 18232.5 929.293   2
   0   6   2 16579.7 1203.93   2
   0   6   2 17613.5 1134.73   1
   0  -6   2 16229.4 885.084   2
   0   6   3 69237.0 2981.94   2
   0  -6   3 70306.9 2301.77   2
   0   6   3 68234.1 2742.72   1
   0   6  -3 72573.2 2312.57   2
   0  -6  -4 30344.6 1724.85   1
   0   6   4 30236.0 1728.61   1
   0  -6   4 29521.4 1287.27   2
   0   6   5 154473. 5169.86   1
   0  -6   5 150727. 4378.29   2
   0  -6  -5 142026. 5054.12   1
   0   6  -5 150924. 5247.51   1
   0   6  -6 10994.4 1209.02   1
   0  -6  -6 11138.9 1154.76   1
   0   6   6 8639.37 1026.02   1
   0  -6   6 9387.59 775.006   2
   0   6  -7 7526.86 1084.21   1
   0   6   7 6116.29 954.904   1
   0  -6   7 7075.00 725.822   2
   0  -6  -7 7401.12 1023.66   1
   0   6   8-204.977 714.905   1
   0   6  -8 1226.61 606.792   1
   0  -6   8 1039.91 410.847   2
   0  -6  -8 526.827 479.545   1
   0   6   9 17050.6 1727.40   1
   0  -6   9 14796.1 1260.65   2
   0   6  10 1718.81 728.798   1
   0   6  11 20429.4 2121.56   1
   0   6  12-90.9527 708.784   1
   0   6  13 81197.9 4766.58   1
   0   6  14-1470.36 864.920   1
   0   6  15 105675. 5957.97   1
   0   6  16-2079.23 997.477   1
   0   7   0 181.773 201.933   2
   0   7  -1 1776.59 379.102   2
   0  -7   1 1869.34 348.357   2
   0   7   1 1840.42 403.171   2
   0   7   2 40175.0 1929.30   1
   0   7   2 39977.6 2046.64   2
   0   7  -2 41229.7 1654.89   2
   0  -7   2 38013.2 1602.86   2
   0   7  -3 17665.1 956.683   2
   0  -7   3 17696.6 959.839   2
   0   7   3 15387.4 1312.29   2
   0   7   3 15101.3 1168.40   1
   0   7   4 98647.1 4010.22   2
   0   7   4 100263. 3746.78   1
   0  -7   4 96678.4 3063.53   2
   0   7   5 239691. 7452.32   1
   0  -7   5 240482. 6567.84   2
   0  -7  -5 237218. 7421.97   1
   0   7  -5 241182. 7562.83   1
   0  -7  -6 116996. 4528.21   1
   0  -7   6 117833. 3704.43   2
   0   7   6 107426. 4424.17   1
   0   7  -6 120035. 4694.23   1
   0  -7  -7 376623. 11220.2   1
   0   7   7 357008. 11079.9   1
   0  -7   7 386056. 10125.9   2
   0   7  -7 378207. 11383.2   1
   0  -7   8 34589.2 1788.54   2
   0   7   8 30542.7 2292.25   1
   0  -7  -8 35467.5 2391.79   1
   0   7  -8 34384.5 2432.79   1
   0  -7   9 169592. 5425.86   2
   0   7   9 150990. 6208.76   1
   0   7  10 16983.0 1818.55   1
   0  -7  10 17202.3 1397.32   2
   0   7  11 72045.1 4177.89   1
   0  -7  11 78358.1 3530.20   2
   0  -7  12 303.965 390.137   2
   0   7  12-16.9645 649.679   1
   0   7  13 42063.7 3333.74   1
   0   7  14 1806.73 992.320   1
   0   7  15 128.407 729.054   1
   0   8   0 25456.4 1461.46   2
   0   8   1 188599. 5969.62   2
   0   8  -1 197620. 5705.94   2
   0   8   2 2764.52 581.508   2
   0   8  -2 3288.42 483.029   2
   0  -8   2 3696.83 467.841   2
   0   8   2 3952.40 621.473   1
   0  -8   3 200642. 5687.20   2
   0   8  -3 200668. 5690.35   2
   0   8   3 204584. 6654.20   2
   0   8   3 206198. 6358.50   1
   0  -8   4 12731.3 836.219   2
   0   8   4 12412.3 1306.70   2
   0   8  -4 12451.7 827.479   2
   0   8   4 10120.1 1064.24   1
   0  -8   5 117647. 3686.89   2
   0   8   5 120786. 4531.82   1
   0   8   5 127028. 4964.07   2
   0   8  -5 113315. 4550.69   1
   0   8  -6 2223.30 595.578   1
   0  -8  -6 1818.90 565.699   1
   0  -8   6 2892.77 442.017   2
   0   8   6 2464.85 607.193   1
   0   8   7 5004.80 914.622   1
   0  -8  -7 7478.99 1037.14   1
   0  -8   7 7734.48 738.730   2
   0   8  -7 7704.52 1107.50   1
   0   8   8 1485.08 660.343   1
   0  -8   8 3091.60 508.775   2
   0  -8  -8 1359.20 514.969   1
   0   8   9-570.406 551.769   1
   0  -8   9 730.851 322.239   2
   0   8  10 5102.46 1104.05   1
   0  -8  10 5327.57 753.021   2
   0   8  11 8888.85 1414.20   1
   0  -8  11 13433.2 1276.81   2
   0   8  12 21102.4 2307.93   1
   0   8  13 22431.7 2457.78   1
   0   8  14 31569.8 3000.36   1
   0   8  15 41598.1 3716.65   2
   0   8  15 43600.4 3694.27   1
   0   9   0 130.982 256.926   2
   0   9  -1-160.449 244.889   2
   0   9   1 484.083 375.545   2
   0   9   2 240160. 7329.25   1
   0  -9   2 246074. 6891.79   2
   0   9  -2 241317. 6867.79   2
   0   9   2 240519. 7504.63   2
   0  -9   3 7244.65 680.964   2
   0   9   3 8040.27 1046.37   2
   0   9  -3 5845.23 622.758   2
   0   9   3 7138.14 892.492   1
   0   9   4 265633. 8125.85   1
   0  -9   4 260138. 7224.80   2
   0   9  -4 265550. 7237.04   2
   0   9   4 270159. 8543.87   2
   0   9   5 1577.00 608.373   2
   0  -9   5 1845.67 379.008   2
   0   9   5 923.534 504.870   1
   0   9  -5 980.653 540.376   1
   0   9   6 106835. 4780.24   2
   0   9  -6 104930. 4499.76   1
   0   9   6 103731. 4398.75   1
   0  -9   6 107786. 3484.39   2
   0  -9  -7 7927.73 1112.82   1
   0  -9   7 10456.9 841.260   2
   0   9   7 9110.14 1198.59   1
   0   9   7 10463.6 1410.90   2
   0   9  -7 9469.58 1254.49   1
   0   9   8 18735.2 1956.60   2
   0   9   8 17959.9 1766.07   1
   0  -9   8 21238.7 1300.09   2
   0  -9   9 16154.1 1188.81   2
   0   9   9 16805.2 1759.86   1
   0  -9  10 22282.3 1486.78   2
   0   9  10 18803.3 2034.55   1
   0   9  11 15774.9 1934.50   1
   0   9  12 21322.3 2471.11   2
   0   9  12 22571.9 2373.41   1
   0   9  13 23347.9 2655.45   2
   0   9  13 20367.7 2376.87   1
   0   9  14-730.436 841.928   2
   0   9  14 1049.83 827.825   1
   0  10   0 531346. 14235.5   2
   0  10   1 178434. 5989.21   2
   0  10  -1 184321. 5708.43   2
   0  10  -2 314551. 8778.98   2
   0  10   2 308522. 9448.59   2
   0  10   2 325882. 9343.26   1
   0  10   3 137532. 5213.27   2
   0  10  -3 133096. 4289.28   2
   0 -10   3 134172. 4311.63   2
   0  10   3 138606. 4950.05   1
   0  10  -4 51223.6 2112.42   2
   0 -10   4 52267.5 2117.53   2
   0  10   4 49473.7 2891.07   2
   0  10   4 53424.3 2738.65   1
   0  10   5 26853.3 1958.47   1
   0  10   5 31173.3 2315.36   2
   0 -10   5 28798.2 1442.08   2
   0  10   6 1041.60 634.961   2
   0  10   6 401.441 419.437   1
   0 -10   6 1343.81 318.264   2
   0  10  -6 205.764 401.244   1
   0  10   7 2229.68 745.612   2
   0 -10   7 1532.31 340.540   2
   0  10   7 1933.00 650.781   1
   0 -10   8 4358.61 575.610   2
   0  10   8 3908.39 949.096   1
   0  10   8 5212.56 1169.52   2
   0  10   9-20.8417 587.644   1
   0  10   9-708.498 645.731   2
   0 -10   9 240.840 238.169   2
   0  10  10 10593.0 1470.92   1
   0  10  10 9759.19 1617.69   2
   0  10  11 12744.7 1844.29   2
   0  10  11 15685.1 1946.09   1
   0  10  12 28931.1 2699.16   1
   0  10  12 27981.1 2870.76   2
   0  10  13 11170.2 1886.82   2
   0  10  13 8684.16 1662.33   1
   0  10  14 25601.0 2802.36   1
   0  10  14 26141.2 2922.82   2
   0  11   0 1035.78 495.118   2
   0  11   1 8120.39 1017.93   2
   0  11  -1 9410.70 964.181   2
   0  11   2 55105.9 2810.41   1
   0  11   2 62178.1 3069.76   2
   0  11  -2 58376.8 2536.22   2
   0  11   3 14117.6 1474.89   2
   0  11   3 13566.3 1323.67   1
   0  11  -3 13808.7 1049.70   2
   0  11  -4 46166.8 2027.03   2
   0  11   4 43957.0 2790.00   2
   0 -11   4 45758.9 2023.05   2
   0  11   4 48016.3 2654.07   1
   0 -11   5 9583.21 802.342   2
   0  11   5 7453.98 1225.98   2
   0  11   5 7787.23 1108.35   1
   0  11   6 23917.3 2214.42   2
   0 -11   6 26620.9 1393.47   2
   0  11   6 22810.9 1923.07   1
   0 -11   7 13280.4 953.210   2
   0  11   7 10693.2 1347.02   1
   0  11   7 12749.4 1685.26   2
   0 -11   8 45574.8 2004.22   2
   0  11   8 42568.0 3201.21   2
   0  11   8 44841.2 2954.47   1
   0  11   9 15240.7 1950.01   2
   0  11   9 12538.3 1616.00   1
   0  11  10 50052.8 3394.15   1
   0  11  10 46491.6 3592.63   2
   0  11  11 669.942 734.991   2
   0  11  11 878.936 758.085   1
   0  11  12 21112.4 2402.62   1
   0  11  12 26337.1 2793.35   2
   0  11  13-1275.58 830.235   1
   0  11  13-669.589 875.896   2
   0  12   0 398966. 11421.4   2
   0  12   1 5040.94 865.645   2
   0  12  -1 3986.41 752.638   2
   0  12  -2 307627. 8725.88   2
   0  12   2 293770. 9178.60   1
   0  12   2 293873. 9412.21   2
   0  12   3 10973.3 1265.17   1
   0  12   3 14669.3 1541.58   2
   0  12  -3 14877.2 1159.33   2
   0  12   4 76197.0 3932.67   2
   0  12  -4 75059.5 2916.19   2
   0  12   4 79040.1 3716.27   1
   0  12   5 31594.9 2475.78   2
   0  12   5 31159.2 2256.71   1
   0 -12   5 32023.5 1627.17   2
   0  12   6 14675.2 1554.71   1
   0  12   6 12464.9 1663.65   2
   0 -12   6 13781.9 992.352   2
   0 -12   7 9537.51 793.651   2
   0  12   7 7184.22 1160.88   1
   0  12   7 8537.97 1440.54   2
   0  12   8 4762.26 1130.42   2
   0  12   8 3142.97 916.072   1
   0  12   9 911.237 595.310   1
   0  12   9-80.0437 604.639   2
   0  12  10 16930.0 1993.44   1
   0  12  10 19830.6 2364.25   2
   0  12  11 2648.46 1024.83   2
   0  12  11 3238.90 1120.13   1
   0  12  12 45370.1 3838.58   2
   0  12  12 45296.2 3562.16   1
   0  12  13 1563.85 999.697   2
   0  12  13 1406.28 828.114   1
   0  13   0 1867.90 572.917   2
   0  13   1 10265.6 1224.17   2
   0  13  -1 8729.43 1033.49   2
   0  13   2 99800.2 4365.56   1
   0  13  -2 106074. 4010.73   2
   0  13   2 105944. 4585.06   2
   0  13   3 28122.2 2101.94   1
   0  13  -3 28272.6 1713.91   2
   0  13   3 30162.3 2302.14   2
   0  13  -4 76704.7 2988.73   2
   0  13   4 71857.8 3940.81   2
   0  13   4 73426.9 3682.16   1
   0  13   5 3557.95 881.513   1
   0  13   5 2577.93 833.999   2
   0  13   6 66438.4 3680.47   1
   0  13   6 74156.8 4241.07   2
   0  13   7 4176.34 925.700   1
   0  13   7 7777.96 1417.30   2
   0  13   8 63074.3 4170.23   2
   0  13   8 57218.3 3588.95   1
   0  13   9 3134.84 886.730   1
   0  13   9 2679.37 1070.29   2
   0  13  10 46015.0 3376.73   1
   0  13  10 48448.2 3827.66   2
   0  13  11 1639.25 1078.39   2
   0  13  11 3467.57 1060.74   1
   0  13  12 18930.3 2293.12   1
   0  13  12 16639.9 2436.78   2
   0  14   0 28186.1 2009.68   2
   0  14   1 27012.4 2037.55   2
   0  14  -1 23849.5 1768.92   2
   0  14   1 23774.7 1935.41   1
   0  14   2 29715.7 2193.28   1
   0  14  -2 29637.8 1902.27   2
   0  14   2 27345.6 2164.13   2
   0  14   3 89797.5 4359.15   2
   0  14  -3 85166.9 3434.69   2
   0  14   3 79217.5 3942.72   1
   0  14  -4 7631.34 834.001   2
   0  14   4 7484.22 1132.32   1
   0  14   4 4481.19 1022.57   2
   0  14   5 69505.5 4062.79   2
   0  14   5 65062.3 3628.06   1
   0  14   6 4238.28 1172.66   2
   0  14   6 2990.05 915.626   1
   0  14   7 11163.7 1504.21   1
   0  14   7 11631.6 1780.73   2
   0  14   8 166.203 540.847   1
   0  14   8 651.129 705.104   2
   0  14   9 1156.83 596.211   1
   0  14   9 1895.90 945.055   2
   0  14  10 3256.30 1006.09   1
   0  14  10 3019.68 1186.95   2
   0  14  11 1601.32 988.776   1
   0  14  11 1189.37 821.430   2
   0  15   0-482.401 402.346   2
   0  15   1 1601.90 625.184   1
   0  15   1 2933.77 777.449   2
   0  15  -1 2529.35 633.085   2
   0  15  -2 2635.79 598.345   2
   0  15   2 1650.82 626.138   1
   0  15   2 2494.31 791.167   2
   0  15   3 202.220 470.760   2
   0  15  -3 411.337 243.795   2
   0  15   3 294.596 378.343   1
   0  15   4 18158.6 1974.40   2
   0  15   4 14609.8 1641.46   1
   0  15  -4 16810.0 1298.41   2
   0  15   5 10750.9 1460.77   1
   0  15   5 10145.2 1535.73   2
   0  15   6 65345.3 3821.02   1
   0  15   6 75467.6 4508.14   2
   0  15   7 39163.2 3300.80   2
   0  15   7 39897.6 2953.87   1
   0  15   8 74763.2 4317.59   1
   0  15   8 80903.2 5039.84   2
   0  15   9 30124.5 2707.29   1
   0  15   9 33474.1 3242.07   2
   0  15  10 29078.1 2738.73   1
   0  15  10 29038.4 3155.91   2
   0  16   0 3346.37 813.164   2
   0  16   1 1446.59 573.228   2
   0  16   1-22.2091 405.872   1
   0  16  -1 1202.61 450.848   2
   0  16   2 110.868 429.111   2
   0  16   2-447.325 535.713   1
   0  16  -2 669.976 439.395   2
   0  16   3 20129.3 1935.80   1
   0  16   3 16378.2 1892.86   2
   0  16  -3 20687.8 1562.31   2
   0  16   4 688.508 607.632   2
   0  16   4 785.580 556.107   1
   0  16   5 18107.2 2147.01   2
   0  16   5 20156.7 2031.68   1
   0  16   6 1134.04 656.784   1
   0  16   6 1723.27 845.307   2
   0  16   7 2359.84 1014.72   2
   0  16   7 1327.87 665.198   1
   0  16   8 2386.70 829.819   1
   0  16   8 1878.80 962.833   2
   0  17   0-1280.18 570.486   1
   0  17   0-988.731 465.875   2
   0  17   1 3.41088 373.998   1
   0  17   1 484.976 438.505   2
   0  17  -1 199.300 367.335   2
   0  17   2 8833.49 1341.71   2
   0  17   2 9265.97 1319.61   1
   0  17  -2 8114.72 1057.56   2
   0  17   3 8028.76 1265.12   1
   0  17   3 8701.24 1415.89   2
   0  17   4 596.296 577.090   1
   0  17   4 1013.79 678.295   2
   0  17   5 80358.0 4345.14   1
   0  17   5 77179.9 4692.47   2
   0  17   6 12830.8 1997.42   2
   0  17   6 8612.43 1413.66   1
   0  17   7 128672. 6046.97   1
   0  17   7 137457. 6988.71   2
   0  18   0 1366.12 614.100   2
   0  18   0-1742.68 712.964   1
   0  18   1 23290.9 2179.79   1
   0  18   1 28552.6 2378.85   2
   0  18   2 459.792 547.087   1
   0  18   2 1337.62 678.024   2
   0  18   3 26600.8 2505.97   2
   0  18   3 28068.7 2429.60   1
   0  18   4 22725.4 2208.79   1
   0  18   4 20277.7 2302.89   2
   0  18   5 9018.17 1645.61   2
   0  18   5 8513.68 1368.52   1
  -1   0  17 68.1159 834.634   1
  -1   0  16-1417.49 935.983   1
  -1   0  15 14781.4 2077.19   1
  -1   0  14 757.150 750.933   1
  -1   0  13 80682.8 4621.40   1
  -1   0  12 154.618 593.674   1
  -1   0  11 73285.7 4003.72   1
   1   0 -10 110.045 436.861   1
  -1   0  10 858.819 621.739   1
   1   0  -9 24676.2 1940.09   1
   1   0  -8 367.920 471.618   1
   1   0  -7 33110.9 2006.02   1
   1   0  -6 530.595 387.337   1
   1   0  -5 442778. 11824.4   1
   1   0  -4 191.739 261.365   1
   1   0  -3 515368. 12969.3   1
  -1   0  -2 250.178 196.401   1
  -1   0  -3 91422.9 3114.88   1
  -1   0  -4 148.870 261.676   1
  -1   0  -5 18534.1 1354.53   1
  -1   0  -6 476.793 373.880   1
  -1   0  -7 7117.82 963.560   1
  -1   0  -8-16.4795 362.625   1
   1   0   9 1252.25 613.629   1
  -1   0  -9 1321.44 622.728   1
   1   0  10-198.048 645.855   1
   1   0  11 30923.3 2590.35   1
   1   0  12-1264.85 766.928   1
   1   0  13 106321. 5627.78   1
   1   0  14-642.583 823.795   1
   1   0  15 67813.0 4687.95   1
   1   0  16-228.605 819.238   1
  -1  -1  17-781.732 857.651   1
  -1   1  17 708.828 1001.52   1
  -1   1  16 24777.9 2752.73   1
  -1  -1  16 19944.8 2548.63   1
  -1  -1  15 3778.82 1249.46   1
  -1   1  15 3642.71 1084.25   1
  -1  -1  14 29385.2 2810.62   1
  -1   1  14 28472.2 2720.09   1
  -1  -1  13 36258.8 2991.33   1
  -1   1  13 33634.5 2884.54   1
  -1  -1  12 49358.9 3353.60   1
  -1   1  12 45277.4 3206.76   1
  -1  -1  11 257831. 9099.63   1
  -1   1  11 256905. 9055.18   1
  -1   1  10 31801.1 2383.77   1
  -1  -1  10 31385.9 2419.93   1
   1   1 -10 31339.0 2338.96   1
   1  -1  -9 396724. 12667.5   1
   1   1  -9 488675. 13129.4   1
   1  -1  -8 13308.5 1331.32   1
   1   1  -8 12770.4 1328.79   1
   1   1  -7 261580. 7830.72   1
   1  -1  -7 238762. 7707.16   1
   1   1  -6 12088.2 1118.32   1
   1  -1  -6 12441.4 1116.60   1
   1   1  -5 172741. 5273.14   1
   1  -1  -5 162660. 5221.74   1
   1  -1  -4 50123.3 2036.69   1
   1   1  -4 44950.6 1940.74   1
   1   1  -3 238532. 6282.00   1
   1  -1  -3 226104. 6312.18   1
  -1   1  -2 11274.0 766.311   1
  -1  -1  -2 10681.5 693.180   1
  -1  -1  -3 601494. 14642.3   1
  -1   1  -3 547303. 14651.0   1
  -1  -1  -4 1490.31 397.364   1
  -1   1  -4 1541.76 428.535   1
  -1   1  -5 100100. 3847.85   1
  -1  -1  -5 105146. 3833.63   1
  -1  -1  -6 3527.48 647.112   1
  -1   1  -6 4940.49 774.235   1
  -1   1  -7 8930.99 1099.79   1
  -1  -1  -7 12037.7 1246.26   1
   1   1   8 2362.54 736.822   1
  -1  -1  -8 3994.87 769.948   1
  -1   1  -8 2751.58 680.216   1
  -1   1  -9 8701.45 1221.49   1
  -1  -1  -9 10692.3 1365.37   1
   1   1   9 8679.27 1234.90   1
   1  -1   9 7089.20 1140.14   1
   1   1  10 5889.36 1111.16   1
   1  -1  10 7901.85 1288.10   1
   1  -1  11 25830.5 2339.97   1
   1   1  11 23719.5 2264.26   1
   1  -1  12-778.715 1001.75   1
   1   1  12 364.014 552.184   1
   1  -1  13 18874.7 2224.07   1
   1   1  13 19166.2 2254.10   1
   1   1  14 987.052 615.499   1
   1  -1  14 321.253 566.806   1
   1  -1  15 1403.85 761.364   1
   1   1  15-350.007 891.031   1
   1   1  16 161.124 856.454   1
  -1  -2  17 23163.3 2806.24   1
  -1   2  17 20626.4 2606.42   1
  -1  -2  16 3740.34 1322.38   1
  -1   2  16 4201.62 1302.91   1
  -1  -2  15 23781.1 2633.56   1
  -1   2  15 21805.3 2507.68   1
  -1   2  14 1033.09 868.671   1
  -1  -2  14 649.303 895.276   1
  -1   2  13 59393.3 3906.11   1
  -1  -2  13 61257.7 4019.04   1
  -1  -2  12 10352.2 1659.28   1
  -1   2  12 8782.53 1442.60   1
  -1  -2  11 81094.7 4309.21   1
  -1   2  11 81065.5 4244.85   1
  -1   2  10 388.195 462.000   1
  -1  -2  10 469.296 592.579   1
   1  -2  -9 18839.1 1678.21   1
   1   2  -9 20398.3 1762.96   1
   1   2  -8 12144.3 1288.48   1
   1  -2  -8 9755.65 1155.60   1
   1   2  -7 87154.6 3655.02   1
   1  -2  -7 85237.8 3616.84   1
   1   2  -6 28315.9 1770.02   1
   1  -2  -6 35145.8 1938.72   1
   1  -2  -5 353775. 9686.50   1
   1   2  -5 342135. 9590.98   1
   1  -2  -4 316874. 8554.51   1
   1   2  -4 308226. 8451.96   1
  -1  -2   3 215520. 5813.22   2
   1   2  -3 226689. 5925.48   1
   1   2  -2 96017.0 2758.42   1
   1  -2  -2 96328.3 2934.49   1
  -1  -2   2 93818.1 2803.12   2
  -1  -2  -1 310844. 7696.00   1
  -1  -2  -1 305686. 7996.41   2
  -1  -2  -2 182971. 5004.16   1
  -1   2  -3 85718.9 3066.02   1
  -1  -2  -3 86139.6 2930.33   1
  -1  -2  -4 428708. 11823.5   1
  -1   2  -4 472355. 12139.7   1
  -1  -2  -5 1197.21 424.363   1
  -1   2  -5 1439.01 495.092   1
   1   2   6 101301. 3933.08   1
  -1  -2  -6 97376.6 3901.91   1
  -1   2  -6 99650.2 4033.41   1
  -1   2  -7-277.861 374.487   1
  -1  -2  -7 238.338 331.538   1
   1   2   7 532.382 477.245   1
   1   2   8 917.705 525.964   1
  -1   2  -8 1188.30 498.954   1
  -1  -2  -8 1917.32 554.863   1
  -1  -2  -9 4815.84 915.100   1
   1   2   9 4953.50 1010.19   1
   1  -2   9 4375.91 1009.65   1
   1  -2  10 36587.7 2752.86   1
   1   2  10 41680.7 2856.92   1
   1   2  11 15637.7 1828.91   1
   1  -2  11 12294.4 1679.51   1
   1   2  12 63342.4 3971.41   1
   1  -2  12 64847.8 4081.19   1
   1   2  13 55202.8 3875.24   1
   1  -2  13 60111.8 4113.33   1
   1   2  14 24310.9 2591.70   1
   1   2  15 42628.7 3654.00   1
   1   2  16 17098.8 2342.42   1
  -1  -3  17 8068.76 1809.34   1
  -1   3  17 8450.54 1707.59   1
  -1   3  16 5936.98 1441.88   1
  -1  -3  16 5978.18 1608.12   1
  -1   3  15 6555.24 1518.72   1
  -1  -3  15 8027.59 1677.57   1
  -1   3  14 51102.2 3735.03   1
  -1  -3  14 44752.3 3551.37   1
  -1  -3  13 1987.87 853.596   1
  -1   3  13 2103.14 797.319   1
  -1   3  12 66656.4 3928.08   1
  -1  -3  12 62653.8 3896.33   1
  -1   3  11 9239.07 1378.89   1
  -1  -3  11 6954.09 1280.78   1
  -1   3  10 89621.0 4284.07   1
  -1  -3  10 81587.2 4199.76   1
   1   3  -9 92869.4 4169.79   1
   1  -3  -9 87025.9 4062.09   1
  -1  -3   9 84583.2 4114.98   1
  -1   3   9 86281.8 4048.42   1
   1   3  -8 74124.3 3542.11   1
   1  -3  -8 78424.0 3605.66   1
  -1  -3   8 75108.4 3595.99   1
   1  -3  -7 34114.1 2115.29   1
   1   3  -7 33819.2 2082.06   1
   1   3  -6 162870. 5391.57   1
   1  -3  -6 157527. 5369.22   1
   1   3  -5 217897. 6333.49   1
   1  -3  -5 198444. 6281.93   1
  -1  -3   4 129697. 3915.39   2
  -1  -3   4 135268. 4221.34   1
   1   3  -4 127364. 4116.15   1
   1  -3  -4 126526. 4196.22   1
  -1  -3   3 365122. 9454.80   2
   1   3  -3 374922. 9602.58   1
  -1  -3   3 363277. 9604.15   1
   1  -3  -3 371805. 9745.90   1
  -1  -3   2 2088.82 305.255   2
   1   3  -2 2085.09 294.694   1
  -1  -3   1 853.139 207.672   2
  -1  -3   0 26358.6 1181.02   2
  -1  -3  -1 122172. 3245.44   1
   1   3   1 116782. 3233.37   1
  -1  -3  -1 111112. 3545.84   2
   1   3   2 46477.5 1699.50   1
  -1  -3  -2 46028.3 1710.20   1
   1   3   3 338872. 9049.71   1
  -1  -3  -3 343319. 9065.35   1
  -1  -3  -4 3282.58 545.510   1
   1   3   4 4040.75 584.836   1
  -1   3  -4 2764.61 556.113   1
  -1   3  -5 298973. 8712.75   1
   1   3   5 290607. 8459.59   1
  -1  -3  -5 288284. 8445.00   1
  -1   3  -6 89570.0 3733.56   1
   1   3   6 83372.7 3513.46   1
  -1  -3  -6 82672.1 3507.08   1
  -1   3  -7 135873. 5255.87   1
  -1  -3  -7 136993. 5133.71   1
   1   3   7 138861. 5138.87   1
  -1   3  -8 104990. 4533.82   1
   1   3   8 100217. 4332.02   1
  -1  -3  -8 98200.5 4356.83   1
   1   3   9 179491. 6944.47   1
  -1  -3  -9 211909. 7275.93   1
   1   3  10 10823.4 1466.80   1
   1   3  11 81032.3 4386.17   1
   1   3  12 5214.81 1179.86   1
   1   3  13 19905.9 2250.13   1
   1   3  14-55.5501 698.970   1
   1   3  15 3740.41 1233.74   1
   1   3  16 1493.64 1083.98   1
  -1   4  16 104185. 6016.80   1
  -1   4  15 29798.9 2970.69   1
  -1  -4  15 36210.5 3313.88   1
  -1  -4  14 28149.2 2779.62   1
  -1   4  14 25385.3 2645.29   1
  -1   4  13 77011.1 4585.48   1
  -1  -4  13 85286.3 4844.66   1
  -1   4  12 885.232 661.190   1
  -1  -4  12 36.6219 743.104   1
  -1   4  11 29769.5 2481.87   1
  -1  -4  11 33760.0 2646.28   1
  -1  -4  10 8976.08 1331.48   1
  -1   4  10 11448.5 1448.68   1
   1   4  -9 3469.58 769.595   1
   1  -4  -9 2885.00 688.520   1
  -1  -4   9 1969.09 753.148   1
  -1   4   9 2655.25 720.791   1
   1   4  -8 15870.2 1511.84   1
  -1   4   8 13157.0 1403.50   1
   1  -4  -8 17296.1 1561.62   1
  -1  -4   8 15775.7 1529.57   1
  -1  -4   7 10754.0 1184.54   1
   1  -4  -7 9592.39 1096.41   1
   1   4  -7 9972.10 1107.71   1
   1   4  -6 63230.2 2871.32   1
   1  -4  -6 59276.2 2825.83   1
  -1  -4   6 65696.9 2568.07   2
  -1  -4   6 62108.2 2892.24   1
  -1  -4   5 12062.8 897.737   2
   1   4  -5 12723.4 1076.15   1
   1  -4  -5 13529.6 1128.72   1
   1   4  -4 75288.3 2875.64   1
  -1  -4   4 80063.6 2694.73   2
   1  -4  -4 80358.4 3008.79   1
   1   4  -3 259.057 232.109   1
  -1  -4   3 545.588 239.832   2
   1   4  -3 335.061 220.172   2
   1   4  -2 111619. 3337.13   2
  -1  -4   2 109292. 3341.38   2
  -1  -4   1 98069.5 3066.20   2
  -1  -4   0 10552.8 750.816   2
   1   4   1 34344.0 1296.10   1
  -1  -4  -1 33480.9 1562.06   2
  -1  -4  -2 231041. 6360.97   1
   1   4   2 242726. 6393.09   1
   1   4   3 34948.7 1606.20   1
  -1  -4  -3 34295.6 1600.63   1
   1  -4   3 34668.0 1104.76   2
   1   4   4 406965. 10610.8   1
  -1   4  -4 406426. 10953.4   1
   1   4   5 39295.1 2090.53   1
  -1  -4  -5 44268.2 2185.16   1
  -1   4  -5 43721.2 2343.41   1
   1   4   6 90529.0 3760.45   1
  -1   4  -6 98778.6 4074.45   1
  -1  -4  -6 100046. 3907.71   1
  -1  -4  -7 3809.10 742.524   1
   1   4   7 4361.64 869.715   1
  -1   4  -7 3697.61 789.120   1
  -1   4  -8 304.198 497.258   1
   1   4   8 950.184 617.584   1
  -1  -4  -8 1028.71 571.314   1
  -1  -4  -9-2096.09 759.111   1
   1   4   9 197.561 563.107   1
   1   4  10 75571.7 4003.81   1
   1   4  11 391.810 644.440   1
   1   4  12 88908.6 4830.21   1
   1   4  13 5153.23 1286.73   1
   1   4  14 27329.9 2762.44   1
   1   4  15 5998.51 1511.47   1
   1   4  16 35072.2 3450.17   1
   1   4  16 41892.7 3591.55   2
  -1   5  16-52.2976 743.518   1
  -1   5  15 1413.60 849.337   1
  -1   5  14 38800.0 3243.82   1
  -1   5  13 1414.10 884.331   1
  -1   5  12 34626.6 2816.60   1
  -1   5  11 28.8784 563.417   1
  -1   5  10 12665.2 1535.83   1
  -1   5   9 458.584 473.048   1
   1   5  -9 487.447 429.973   1
   1  -5  -9 976.226 550.533   1
  -1   5   8 23552.3 1892.92   1
   1  -5  -8 27227.2 2003.83   1
  -1  -5   8 24036.1 1585.05   2
   1   5  -8 22240.5 1811.66   1
  -1   5   7 10357.5 1184.92   1
   1   5  -7 10287.3 1151.79   1
  -1  -5   7 10712.0 984.887   2
   1  -5  -7 11231.8 1208.88   1
  -1   5   6 109716. 4290.32   1
   1  -5  -6 114607. 4327.85   1
   1   5  -6 121000. 4348.96   1
  -1  -5   6 109369. 3790.28   2
  -1  -5   5 692.688 255.733   2
  -1   5   5 168.285 333.064   1
   1   5  -5 207.648 322.425   1
   1  -5  -5 605.658 347.432   1
  -1  -5   4 223622. 6325.01   2
   1  -5  -4 226431. 6783.42   1
   1   5  -4 234197. 6682.07   1
   1   5  -3 21407.3 1121.80   2
   1   5  -3 19034.2 1134.00   1
  -1  -5   3 20564.6 1108.52   2
   1   5  -2 5921.36 580.526   2
  -1  -5   2 6043.75 573.324   2
  -1  -5   1 605.662 241.039   2
   1   5  -1 468.731 233.056   2
  -1   5   0 4952.46 431.095   2
   1   5   0 5122.60 581.867   2
  -1  -5   0 4511.91 532.783   2
   1   5   1 11010.5 705.052   1
  -1  -5  -1 9669.29 832.704   2
  -1   5  -1 10963.0 543.375   2
   1   5   2 4865.71 530.024   1
  -1  -5  -2 4790.69 511.985   1
   1  -5   3 27136.1 915.457   2
   1   5   3 29184.7 1462.18   1
  -1  -5  -3 29192.4 1467.60   1
   1   5   4 123120. 4031.85   1
  -1  -5  -4 115448. 3998.93   1
   1  -5   4 115950. 3218.66   2
   1   5   5 56817.8 2599.51   1
  -1   5  -5 61780.0 2907.71   1
   1  -5   5 56464.5 1965.06   2
  -1  -5  -5 57736.9 2632.00   1
  -1  -5  -6 724634. 19234.3   1
   1   5   6 730196. 19180.7   1
  -1   5  -6 732190. 19557.4   1
  -1   5  -7 56010.8 3081.37   1
   1   5   7 54309.1 2887.44   1
  -1  -5  -7 58571.9 2988.43   1
  -1   5  -8 718860. 19661.2   1
  -1  -5  -8 696058. 19328.2   1
   1   5   8 713474. 19330.8   1
   1   5   9 67210.7 3611.81   1
  -1  -5  -9 67287.5 3617.85   1
   1   5  10 228524. 8242.55   1
   1   5  11 8378.74 1383.31   1
   1   5  12 30583.0 2729.07   1
   1   5  13 952.193 892.027   1
   1   5  14 11202.3 1819.56   1
   1   5  15 1302.41 914.933   2
   1   5  15 2319.70 1109.77   1
  -1   6  16 121212. 6647.80   1
  -1   6  15 5786.83 1444.66   1
  -1   6  14 102213. 5609.84   1
  -1   6  13 559.273 720.807   1
  -1   6  12 34133.7 2837.27   1
  -1  -6  12 40704.8 2637.59   2
  -1  -6  11 3085.00 705.602   2
  -1   6  11 2117.20 831.752   1
  -1   6  10 393.699 584.682   1
  -1  -6  10 456.976 327.826   2
   1   6  -9 16796.8 1650.68   1
  -1   6   9 13688.0 1548.27   1
  -1  -6   9 15791.8 1334.33   2
  -1  -6   8 6320.45 773.163   2
   1  -6  -8 5828.50 942.569   1
  -1   6   8 5911.38 996.220   1
   1   6  -8 5646.70 909.699   1
   1   6  -7 170.997 403.900   1
  -1   6   7 198.030 473.787   1
  -1  -6   7 468.706 291.990   2
  -1   6   6 74878.0 3357.26   1
  -1  -6   6 76777.6 2889.01   2
   1  -6  -6 79639.5 3423.24   1
   1   6  -6 73054.2 3291.68   1
  -1  -6   5 14767.1 1009.87   2
  -1   6   5 13405.8 1230.35   1
   1  -6  -5 13796.7 1232.40   1
   1   6  -5 14255.1 1202.87   1
   1   6  -4 99280.7 3622.83   1
  -1   6   4 96978.6 3776.49   1
  -1  -6   4 105266. 3416.74   2
   1   6  -4 108513. 3414.84   2
  -1   6   3 5540.27 707.799   1
   1   6  -3 6785.15 644.816   2
  -1  -6   3 5608.34 586.134   2
   1   6  -2 92648.2 3095.48   2
  -1  -6   2 89340.3 3062.76   2
  -1   6   1 41002.3 1744.10   2
  -1  -6   1 39509.4 1766.42   2
   1   6  -1 37818.9 1742.75   2
   1   6   0 101131. 3432.52   2
  -1  -6   0 93939.2 3342.68   2
  -1   6   0 98174.7 3021.68   2
   1   6   1 265.298 215.338   1
  -1  -6  -1 396.270 272.321   2
   1   6   1 19.5297 307.251   2
  -1   6  -1 448.434 161.451   2
  -1   6  -2 74729.1 2137.07   2
   1   6   2 73249.8 2645.73   1
   1   6   3 1527.34 364.230   1
   1  -6   3 1522.25 182.738   2
   1  -6   4 71139.9 2112.04   2
  -1  -6  -4 75514.2 2956.40   1
   1   6   4 73765.2 2918.02   1
  -1  -6  -5 86756.4 3444.20   1
   1   6   5 86559.4 3425.29   1
   1  -6   5 84768.5 2572.77   2
  -1   6  -5 80299.0 3625.46   1
   1   6   6 16763.1 1423.57   1
   1  -6   6 16848.2 950.176   2
  -1  -6  -6 16225.5 1414.89   1
  -1   6  -6 16702.3 1535.82   1
   1   6   7 54.7611 511.482   1
   1  -6   7 330.315 257.357   2
  -1   6  -7 311.633 394.676   1
  -1  -6  -7-252.107 502.852   1
  -1  -6  -8 29537.4 2187.48   1
   1   6   8 30535.2 2204.75   1
   1   6   9 8794.88 1303.85   1
   1   6  10 50008.7 3184.35   1
   1   6  11 140.523 794.521   1
   1   6  12 37000.5 2987.00   1
   1   6  13 1027.00 666.806   1
   1   6  13 1923.12 1039.39   2
   1   6  14 41875.1 3520.80   2
   1   6  14 39505.9 3365.61   1
   1   6  15 2043.00 854.965   1
   1   6  15-221.007 697.649   2
  -1   7  16 692.950 1193.88   1
  -1   7  15 20195.2 2540.53   1
  -1   7  14 15253.5 2054.00   1
  -1   7  13 15381.0 2057.53   1
  -1   7  12 61468.1 3966.26   1
  -1  -7  12 69174.6 3516.66   2
  -1  -7  11 3994.23 773.340   2
  -1   7  11 3396.16 961.072   1
  -1   7  10 43898.4 3001.43   1
  -1  -7  10 46858.2 2563.74   2
  -1  -7   9 13464.0 1226.39   2
  -1   7   9 11161.7 1411.91   1
  -1  -7   8 88594.6 3423.21   2
  -1   7   8 84400.9 4011.21   1
   1   7  -8 85392.2 3985.02   1
   1  -7  -8 82229.9 3959.31   1
  -1   7   7 2657.43 720.909   1
   1  -7  -7 2109.98 645.206   1
  -1  -7   7 2503.57 501.610   2
   1   7  -7 2246.51 581.986   1
   1   7  -6 154119. 5473.55   1
  -1   7   6 146791. 5494.97   1
   1  -7  -6 156511. 5560.90   1
  -1  -7   6 158683. 4922.18   2
  -1  -7   5 29397.5 1533.10   2
  -1   7   5 27267.2 1830.88   1
   1   7  -5 28915.2 1788.73   1
   1   7  -4 122139. 4271.26   1
  -1  -7   4 117708. 3937.96   2
  -1   7   4 125525. 4494.14   1
   1   7  -4 127819. 3984.32   2
  -1   7   3 520.606 347.404   1
   1   7  -3 607.582 283.448   2
  -1  -7   3 363.738 246.097   2
  -1  -7   2 27487.2 1463.74   2
   1   7  -2 28335.1 1478.51   2
  -1   7   1 682.173 298.604   2
  -1  -7   1 130.720 229.595   2
   1   7  -1 52.9282 249.917   2
  -1  -7   0 2010.26 430.701   2
  -1   7   0 2153.26 403.659   2
   1   7   0 2035.89 451.334   2
   1   7   1 89486.4 3529.19   2
   1   7   1 95024.0 3198.82   1
  -1   7  -1 98909.9 2948.06   2
   1   7   2 31428.4 1864.45   2
  -1   7  -2 30163.5 1160.39   2
   1   7   2 30517.1 1545.27   1
   1  -7   3 91945.6 2635.94   2
   1   7   3 101261. 3474.19   1
   1   7   4 129080. 4411.00   1
  -1  -7  -4 137337. 4494.58   1
   1  -7   4 123137. 3413.04   2
   1  -7   5 81429.7 2454.77   2
  -1  -7  -5 82265.9 3404.94   1
   1   7   5 83191.9 3405.23   1
  -1   7  -5 81101.7 3675.49   1
   1  -7   6 322136. 8323.73   2
  -1  -7  -6 321333. 9622.92   1
  -1   7  -6 320109. 9971.08   1
   1   7   6 319061. 9558.96   1
   1   7   7 58814.9 3055.25   1
   1   7   7 62257.8 3420.12   2
  -1   7  -7 59039.9 3264.92   1
   1  -7   7 58283.1 2176.23   2
  -1  -7  -7 54061.4 2969.66   1
   1   7   8 341286. 10915.3   2
  -1  -7  -8 330033. 10406.5   1
   1  -7   8 330000. 9075.12   2
   1   7   8 337936. 10411.9   1
   1   7   9 12930.9 1671.39   2
   1  -7   9 11741.1 1021.59   2
   1   7   9 11483.2 1475.57   1
   1  -7  10 110482. 4093.43   2
   1   7  10 102218. 4950.53   1
   1   7  10 105277. 5251.61   2
   1  -7  11 34469.8 2100.59   2
   1   7  11 29838.9 2716.23   2
   1   7  11 28589.3 2522.67   1
   1   7  12 11631.3 1725.38   1
   1   7  12 17035.2 2186.64   2
   1   7  13 30601.7 2833.22   1
   1   7  13 35579.9 3190.66   2
   1   7  14 3408.51 1097.26   1
   1   7  14 2699.74 1144.32   2
   1   7  15 192.827 634.081   1
   1   7  15 1351.92 1010.19   2
  -1   8  15 34568.9 3281.40   1
  -1   8  14 17972.8 2314.08   1
  -1   8  13 59968.7 4104.25   1
  -1   8  12 11948.2 1749.34   1
  -1  -8  12 12972.0 1438.95   2
  -1  -8  11 27808.8 1963.55   2
  -1   8  11 25009.5 2400.65   1
  -1   8  10 131.766 586.169   1
  -1  -8  10 566.851 399.370   2
  -1   8   9 1629.62 690.793   1
  -1  -8   9 2582.91 545.035   2
  -1   8   8 1832.17 709.657   1
   1   8  -8 2066.27 659.433   1
  -1  -8   8 2429.51 530.072   2
   1  -8  -8 1800.09 664.631   1
  -1   8   7 64444.9 3358.14   1
  -1  -8   7 65737.5 2761.82   2
   1   8  -7 68804.3 3369.03   1
   1  -8  -7 69816.7 3438.39   1
  -1   8   6 9559.55 1173.57   1
   1   8  -6 8535.68 1068.24   1
  -1  -8   6 9136.84 867.991   2
   1   8  -5 31380.2 1930.91   1
  -1  -8   5 30439.9 1613.69   2
  -1   8   5 30189.3 1991.67   1
   1   8  -4 156478. 4831.36   2
  -1   8   4 157718. 5431.12   1
  -1  -8   4 150864. 4811.78   2
  -1  -8   3 5402.03 646.537   2
   1   8  -3 4352.65 591.878   2
  -1   8   3 4730.77 727.877   1
   1   8  -2 99204.0 3506.10   2
  -1  -8   2 98741.7 3482.85   2
  -1   8   2 98184.2 3678.69   2
  -1   8   1 87457.3 3168.98   2
   1   8  -1 87222.6 3264.99   2
  -1  -8   1 84403.8 3218.74   2
  -1   8   0 119467. 3734.30   2
   1   8   0 115235. 4095.52   2
  -1  -8   0 106499. 3981.67   2
   1   8   1 58710.3 2717.93   2
  -1   8  -1 62132.5 2188.02   2
   1   8   1 58713.9 2394.55   1
  -1   8  -2 223477. 5886.22   2
   1   8   2 212799. 6973.21   2
   1   8   2 217746. 6478.37   1
   1   8   3 1806.90 630.165   2
   1   8   3 880.119 403.963   1
  -1   8  -3 1736.09 252.986   2
   1   8   4 304669. 8760.02   1
   1   8   4 299409. 9387.06   2
   1  -8   4 299400. 7582.30   2
   1   8   5 84650.1 3567.68   1
   1  -8   5 87501.5 2564.29   2
   1   8   5 86507.1 4043.49   2
  -1  -8  -5 88493.9 3627.41   1
   1  -8   6 71640.1 2276.64   2
  -1  -8  -6 70956.6 3313.82   1
   1   8   6 67643.5 3619.38   2
  -1   8  -6 75961.7 3660.12   1
   1   8   6 64747.4 3191.48   1
   1   8   7 24065.6 2131.85   2
   1  -8   7 29002.3 1299.26   2
   1   8   7 28127.8 2055.07   1
  -1  -8  -7 28503.0 2051.42   1
   1   8   8 19256.8 1982.32   2
   1  -8   8 18737.8 1109.68   2
  -1  -8  -8 20698.9 1821.36   1
   1   8   8 17693.9 1714.72   1
   1   8   9 3.21199 512.550   1
   1  -8   9 45.4095 244.439   2
   1   8   9-201.173 562.240   2
   1   8  10 23915.1 2442.03   2
   1  -8  10 28530.7 1640.69   2
   1   8  10 24477.2 2283.22   1
   1   8  11 154.665 626.616   1
   1   8  11-479.872 784.115   2
   1   8  12 23898.5 2412.93   1
   1   8  12 23236.2 2570.41   2
   1   8  13 754.205 701.048   1
   1   8  13 1680.62 914.795   2
   1   8  14 41160.0 3610.36   2
   1   8  14 36728.5 3284.41   1
  -1   9  15 10929.0 1880.43   1
  -1   9  14 71632.7 4744.27   1
  -1   9  13 496.151 861.771   1
  -1   9  12 70132.7 4343.99   1
  -1   9  11 80234.1 4523.94   1
  -1  -9  11 85582.7 3695.62   2
  -1   9  10 44054.7 3111.18   1
  -1  -9  10 47332.7 2460.43   2
  -1   9   9 90462.1 4493.76   1
  -1  -9   9 93635.4 3675.57   2
  -1   9   8 81794.2 4124.60   1
   1   9  -8 94070.9 4253.17   1
  -1  -9   8 84557.3 3374.33   2
   1   9  -7 83936.1 3829.16   1
  -1  -9   7 77402.2 3109.57   2
  -1   9   7 75105.8 3774.33   1
  -1   9   6 65050.4 3396.88   1
   1   9  -6 73976.7 3444.95   1
  -1  -9   6 74871.1 2917.54   2
  -1   9   5 63566.4 3173.01   1
  -1  -9   5 64090.2 2636.73   2
   1   9  -5 65032.9 2615.89   2
   1   9  -5 64000.1 3024.13   1
  -1   9   4 45813.7 2560.37   1
  -1   9   4 47498.9 2678.07   2
   1   9  -4 47124.3 2153.20   2
  -1  -9   4 48890.9 2190.81   2
  -1  -9   3 78090.2 3036.25   2
  -1   9   3 82191.5 3486.44   2
  -1   9   3 78441.9 3406.00   1
   1   9  -3 77985.6 3033.37   2
   1   9  -2 7840.00 825.286   2
  -1   9   2 5752.82 783.153   2
  -1  -9   2 6044.34 737.045   2
  -1   9   1 10146.2 943.683   2
   1   9  -1 10106.4 979.164   2
  -1  -9   1 9516.40 934.967   2
  -1   9   0 9808.96 865.229   2
   1   9   0 10444.6 1043.62   2
   1   9   1 138685. 4569.88   1
   1   9   1 134346. 4936.22   2
  -1   9  -1 143512. 4296.33   2
   1   9   2 806.309 470.375   2
   1   9   2 309.629 341.771   1
  -1   9  -2 321.610 245.896   2
   1   9   3 248737. 7507.41   1
   1   9   3 251565. 8137.06   2
  -1   9  -3 253604. 6634.87   2
   1   9   4 2514.64 755.277   2
   1   9   4 2274.48 549.439   1
   1   9   5 67883.9 3153.73   1
   1   9   5 71387.7 3660.98   2
   1  -9   5 66669.3 2076.49   2
  -1  -9  -6-298.004 382.367   1
   1  -9   6 922.977 204.188   2
  -1   9  -6 415.714 407.543   1
   1   9   6 167.291 420.710   1
   1   9   6 998.288 610.926   2
   1   9   7 21449.4 1775.68   1
  -1  -9  -7 17788.6 1609.04   1
   1  -9   7 17614.5 917.694   2
   1   9   7 16922.8 1833.40   2
   1   9   8 24062.4 2274.21   2
   1   9   8 22640.0 1977.13   1
   1  -9   8 26780.3 1267.87   2
   1  -9   9 23968.2 1293.51   2
   1   9   9 21474.5 2238.54   2
   1   9   9 21182.4 2012.89   1
   1   9  10 19092.9 1975.98   1
   1   9  10 21595.0 2335.73   2
   1   9  11 50082.1 3434.04   1
   1   9  11 50391.2 3745.83   2
   1   9  12-1671.69 928.434   2
   1   9  12 391.719 610.378   1
   1   9  13 19860.3 2470.10   2
   1   9  13 19066.2 2312.58   1
   1   9  14 91.0703 763.536   1
   1   9  14 705.391 922.810   2
  -1  10  14 954.772 827.140   1
  -1  10  13 37184.5 3242.52   1
  -1  10  12 8280.53 1569.96   1
  -1  10  11 56191.2 3773.42   1
  -1 -10  10 6287.12 860.242   2
  -1  10  10 4785.86 1037.92   1
  -1  10   9 4351.75 1034.69   1
  -1 -10   9 5736.08 796.537   2
  -1 -10   8-56.1071 266.089   2
  -1  10   8 368.774 514.866   1
  -1 -10   7 13273.8 1110.75   2
   1  10  -7 9958.44 1255.95   1
  -1  10   7 9511.32 1315.45   1
  -1  10   6 3836.98 871.758   1
   1  10  -6 4121.47 788.687   1
  -1 -10   6 3723.34 602.960   2
  -1  10   5 29207.0 2187.16   2
  -1  10   5 28526.6 2050.89   1
   1  10  -5 27676.1 1906.38   1
  -1 -10   5 27554.5 1600.59   2
   1  10  -5 24924.9 1534.15   2
   1  10  -4 64186.0 2720.19   2
  -1 -10   4 64620.4 2733.82   2
  -1  10   4 70889.1 3426.95   2
  -1  10   4 65740.9 3225.69   1
  -1  10   3 174239. 6023.64   2
  -1 -10   3 169590. 5462.42   2
  -1  10   3 173111. 5992.16   1
   1  10  -3 171407. 5490.99   2
  -1  10   2 131608. 4724.07   2
   1  10  -2 127340. 4519.35   2
  -1 -10   2 130678. 4521.44   2
   1  10  -1 306152. 8932.44   2
  -1  10   1 310720. 8828.84   2
  -1 -10   1 296754. 8863.55   2
  -1  10   0 151725. 4858.91   2
   1  10   0 147981. 5241.12   2
  -1  10  -1 292887. 8107.92   2
   1  10   1 285028. 8910.35   2
   1  10   1 298773. 8476.86   1
  -1  10  -2 121550. 3745.87   2
   1  10   2 115905. 4240.40   1
   1  10   2 118241. 4738.21   2
   1  10   3 107474. 4010.47   1
   1  10   3 102074. 4466.10   2
  -1  10  -3 104007. 3211.13   2
   1  10   4 46542.7 2454.06   1
   1  10   4 43416.9 2767.22   2
   1  10   5 2524.85 600.445   1
   1  10   5 2107.13 726.285   2
   1  10   6 2090.67 760.563   2
   1  10   6 1790.94 569.968   1
   1 -10   6 2758.89 295.359   2
   1  10   7 398.477 627.837   2
   1  10   7 1101.79 578.154   1
   1 -10   7 845.018 180.601   2
   1  10   8 1243.50 755.118   2
   1 -10   8 909.912 223.347   2
   1  10   8 274.880 515.796   1
   1  10   9 75.9278 600.299   1
   1  10   9 908.042 640.516   2
   1  10  10 2190.57 751.940   1
   1  10  10 1974.87 956.818   2
   1  10  11 4749.88 1311.41   2
   1  10  11 5987.99 1211.56   1
   1  10  12 19393.2 2416.88   2
   1  10  12 13316.5 1912.42   1
   1  10  13 25196.9 2865.77   2
   1  10  13 24721.6 2573.47   1
  -1  11  14 382.798 681.906   2
  -1  11  14 2500.18 1061.71   1
  -1  11  13 29519.2 3089.70   2
  -1  11  13 29919.8 2947.15   1
  -1  11  12 6819.77 1503.20   2
  -1  11  12 4350.17 1259.54   1
  -1  11  11 90824.7 4997.86   1
  -1  11  10 8143.19 1396.40   1
  -1 -11   9 185871. 5980.47   2
  -1  11   9 182838. 7699.70   2
  -1  11   9 179597. 7232.77   1
  -1 -11   8 29271.9 1772.80   2
  -1  11   8 27557.6 2354.70   1
  -1  11   8 27233.8 2514.15   2
  -1 -11   7 215959. 6692.76   2
  -1  11   7 222918. 8268.36   2
   1  11  -7 227075. 7761.19   1
  -1  11   7 210985. 7791.79   1
   1  11  -6 12627.7 1405.54   1
  -1  11   6 11908.5 1569.96   2
  -1 -11   6 11865.6 1073.57   2
  -1  11   6 10457.3 1352.17   1
  -1  11   5 91886.6 4416.12   2
   1  11  -5 92743.1 4029.06   1
   1  11  -5 89254.2 3480.72   2
  -1  11   5 100709. 4343.54   1
  -1 -11   5 93117.4 3536.35   2
  -1  11   4 1703.71 573.473   1
  -1  11   4 2439.27 699.195   2
  -1 -11   4 2337.61 509.388   2
   1  11  -4 1627.34 486.035   2
  -1  11   3 32047.6 2146.80   1
   1  11  -3 31208.2 1839.88   2
  -1  11   3 32975.0 2160.18   2
  -1 -11   3 29749.5 1800.94   2
  -1 -11   2 1060.78 442.186   2
  -1  11   2 502.821 463.028   2
   1  11  -2 1106.72 470.495   2
   1  11  -1 1862.76 550.587   2
  -1  11   1 1558.85 534.050   2
  -1  11   0 1953.16 480.672   2
   1  11   0 1765.28 550.749   2
   1  11   1 42745.0 2244.82   1
   1  11   1 44960.7 2584.76   2
  -1  11  -1 42924.8 2030.91   2
   1  11   2 9878.65 1247.33   2
   1  11   2 10012.8 1055.24   1
  -1  11  -2 10540.1 842.472   2
  -1  11  -3 35763.0 1546.11   2
   1  11   3 34233.9 2403.43   2
   1  11   3 33642.2 2050.84   1
   1  11   4 9473.77 1319.81   2
   1  11   4 12763.1 1268.46   1
   1  11   5 976.440 629.351   2
   1  11   5 811.672 420.354   1
   1  11   6 1026.97 552.533   1
   1  11   6-316.769 556.646   2
   1 -11   7 495.101 116.436   2
   1  11   7 311.448 349.553   1
   1  11   7 284.992 599.254   2
   1  11   8 1540.02 787.324   2
   1  11   8 3662.38 895.733   1
   1  11   9 18736.7 1938.70   1
   1  11   9 20328.9 2286.77   2
   1  11  10 1251.45 627.053   1
   1  11  10-262.511 596.664   2
   1  11  11 27246.9 2800.35   2
   1  11  11 22483.3 2334.63   1
   1  11  12-1767.33 780.071   1
   1  11  12 290.523 591.113   2
   1  11  13 3406.27 1135.04   1
   1  11  13 2606.32 1227.72   2
  -1  12  13 28158.0 2887.87   1
  -1  12  13 24133.1 2844.66   2
  -1  12  12 12799.8 2023.39   2
  -1  12  12 12389.0 1870.19   1
  -1  12  11 33044.2 3157.38   2
  -1  12  11 32588.8 2905.40   1
  -1  12  10 996.572 805.787   2
  -1  12  10 706.852 633.248   1
  -1  12   9-1522.78 809.729   1
  -1  12   9-1111.37 764.277   2
  -1  12   8 1692.17 782.234   2
  -1  12   8 1990.93 759.116   1
  -1 -12   8 1806.10 451.781   2
  -1 -12   7 32531.2 1862.18   2
  -1  12   7 31436.0 2492.66   1
  -1  12   7 33854.3 2773.89   2
   1  12  -6 5606.62 987.401   1
  -1  12   6 4106.12 946.896   1
  -1 -12   6 4396.86 650.830   2
  -1  12   6 6583.46 1196.50   2
  -1 -12   5 54702.7 2504.01   2
   1  12  -5 53028.5 2918.79   1
  -1  12   5 51088.6 3020.91   1
   1  12  -5 45843.4 2344.47   2
  -1  12   5 51477.4 3188.42   2
  -1  12   4 1604.49 674.033   1
  -1  12   4 1730.16 758.820   2
  -1 -12   4 1840.51 490.260   2
   1  12  -4 1615.98 473.104   2
  -1  12   3 142453. 5403.89   2
  -1 -12   3 129841. 4780.06   2
   1  12  -3 138756. 4858.08   2
  -1  12   3 132589. 5302.49   1
  -1  12   2 6872.61 1044.66   1
  -1  12   2 5620.89 881.638   2
   1  12  -2 6471.94 891.081   2
  -1  12   1 278595. 8402.37   2
   1  12  -1 269539. 8486.98   2
   1  12   0 544.898 482.768   2
  -1  12   0 121.020 341.312   2
  -1  12  -1 343046. 9588.41   2
   1  12   1 351761. 10038.6   1
   1  12   1 329789. 10426.5   2
   1  12   2 3462.48 706.661   1
   1  12   2 5530.29 973.203   2
  -1  12  -2 4500.60 609.697   2
  -1  12  -3 152725. 4544.10   2
   1  12   3 142380. 5328.35   1
   1  12   3 151062. 6020.66   2
   1  12   4 40986.8 2857.15   2
   1  12   4 40795.3 2441.20   1
   1  12   5 4472.15 1013.01   2
   1  12   5 5430.47 904.648   1
   1  12   6 28253.9 2503.54   2
   1  12   6 23324.8 1961.25   1
   1  12   7 160.815 638.438   2
   1  12   7 73.5251 411.777   1
   1  12   8-313.395 440.299   1
   1  12   8 885.988 732.884   2
   1  12   9 2519.32 780.868   1
   1  12   9 2704.25 1036.56   2
   1  12  10 12119.7 1733.68   1
   1  12  10 13163.9 1957.06   2
   1  12  11 20778.3 2277.73   1
   1  12  11 25581.4 2827.06   2
   1  12  12 5007.05 1233.42   1
   1  12  12 7172.17 1551.04   2
  -1  13  12 11488.9 2009.33   2
  -1  13  12 11868.5 1804.75   1
  -1  13  11 53832.2 4120.58   2
  -1  13  11 45915.5 3566.47   1
  -1  13  10 1149.25 767.855   2
  -1  13  10 2076.05 950.694   1
  -1  13   9 88900.8 4846.16   1
  -1  13   9 101876. 5505.89   2
  -1  13   8 9262.77 1666.01   2
  -1  13   8 8580.53 1369.15   1
  -1  13   7 103334. 5004.99   1
  -1  13   7 113359. 5559.37   2
  -1 -13   6 31819.2 1850.47   2
  -1  13   6 29174.0 2396.02   1
  -1  13   6 28250.8 2510.21   2
  -1 -13   5 59486.9 2728.86   2
   1  13  -5 53567.0 2600.43   2
  -1  13   5 58684.7 3362.13   1
   1  13  -5 55932.4 3105.41   1
  -1  13   5 54626.8 3406.13   2
  -1  13   4 12.0682 515.792   1
  -1 -13   4 1235.47 423.851   2
   1  13  -4 800.958 366.372   2
  -1  13   4 259.982 540.774   2
  -1  13   3 9565.01 1267.95   1
   1  13  -3 9512.71 1062.86   2
  -1  13   3 6652.21 1049.89   2
  -1  13   2 6990.28 1045.94   1
   1  13  -2 7341.20 986.499   2
  -1  13   2 6872.90 1011.58   2
  -1  13   1 1226.04 490.794   2
   1  13  -1 1735.93 598.718   2
  -1  13   0 810.165 369.593   2
   1  13   0 697.587 430.508   2
  -1  13  -1 45831.2 2288.32   2
   1  13   1 42874.1 2742.59   2
   1  13   1 48105.2 2579.61   1
   1  13   2 53355.9 2783.87   1
  -1  13  -2 52004.1 2322.08   2
   1  13   2 50188.2 3089.61   2
  -1  13  -3 93401.0 3209.82   2
   1  13   3 85850.7 4425.74   2
   1  13   3 92758.5 3998.61   1
   1  13   4 34894.9 2719.14   2
   1  13   4 32278.4 2244.29   1
   1  13   5 56864.8 3655.08   2
   1  13   5 58916.7 3191.50   1
   1  13   6-1192.55 786.824   2
   1  13   6-648.794 491.612   1
   1  13   7 40642.3 2771.27   1
   1  13   7 44901.2 3411.20   2
   1  13   8 9970.33 1415.59   1
   1  13   8 9171.73 1641.63   2
   1  13   9 37815.6 2882.45   1
   1  13   9 36431.6 3278.99   2
   1  13  10 599.205 720.088   2
   1  13  10 518.988 592.328   1
   1  13  11 35139.0 3015.78   1
   1  13  11 46310.2 3851.80   2
  -1  14  11 15785.6 2307.44   2
  -1  14  11 19152.1 2315.44   1
  -1  14  10 690.443 865.056   2
  -1  14  10 475.192 574.975   1
  -1  14   9 854.112 667.530   1
  -1  14   9 1540.91 924.426   2
  -1  14   8 146.187 629.771   2
  -1  14   8 88.9675 433.509   1
  -1  14   7 7175.79 1447.98   2
  -1  14   7 6040.48 1176.92   1
  -1  14   6 1243.50 694.331   2
  -1  14   6 1622.45 684.592   1
   1  14  -5 26649.4 1749.55   2
  -1  14   5 22954.2 2204.79   2
  -1  14   5 24370.0 2201.72   1
   1  14  -4 10252.3 1103.76   2
  -1  14   4 11712.8 1459.37   1
  -1  14   4 9317.07 1338.50   2
  -1  14   3 20855.2 1907.57   1
   1  14  -3 21836.3 1680.40   2
  -1  14   3 20455.9 1878.99   2
   1  14  -2 17522.1 1546.68   2
  -1  14   2 14176.6 1468.96   2
  -1  14   2 16402.9 1639.01   1
   1  14  -1 31181.0 2198.45   2
  -1  14   1 32479.7 2152.94   2
   1  14   0 19216.9 1764.40   2
  -1  14   0 21064.2 1594.37   2
   1  14   0 18610.4 1593.56   1
  -1  14  -1 41653.5 2205.61   2
   1  14   1 40083.9 2660.40   2
   1  14   1 36844.2 2335.99   1
   1  14   2 73238.6 3526.56   1
   1  14   2 74583.8 3991.71   2
  -1  14  -2 78967.4 3101.63   2
   1  14   3 29349.1 2435.87   2
   1  14   3 29590.3 2130.35   1
  -1  14  -3 29239.9 1558.14   2
   1  14   4 110354. 4706.92   1
   1  14   4 106923. 5265.89   2
   1  14   5 653.518 489.797   1
   1  14   5 1023.39 572.290   2
   1  14   6 32180.4 2434.97   1
   1  14   6 39323.7 3158.95   2
   1  14   7 1842.26 666.143   1
   1  14   7 549.421 588.683   2
   1  14   8 919.173 616.939   2
   1  14   8 931.357 682.546   1
   1  14   9 1571.62 745.774   1
   1  14   9 6130.05 1448.86   2
   1  14  10 33758.3 3298.90   2
   1  14  10 30619.7 2715.82   1
  -1  15  10 6004.37 1357.60   1
  -1  15  10 7817.58 1662.78   2
  -1  15   9 11522.7 1841.34   2
  -1  15   9 11552.9 1717.82   1
  -1  15   8 13278.6 1991.66   2
  -1  15   8 13582.2 1805.37   1
  -1  15   7 14560.9 1829.07   1
  -1  15   7 13796.2 1949.72   2
  -1  15   6 31673.2 2765.38   2
  -1  15   6 32857.3 2674.96   1
   1  15  -5 11345.7 1161.56   2
  -1  15   5 13999.1 1688.67   1
  -1  15   5 13330.1 1693.19   2
   1  15  -4 4698.68 799.063   2
  -1  15   4 5215.59 1052.06   2
  -1  15   4 4147.57 952.851   1
   1  15  -3 12988.9 1307.73   2
  -1  15   3 12990.4 1504.69   2
  -1  15   3 10724.3 1446.29   1
  -1  15   2-108.208 449.487   1
  -1  15   2-282.986 443.698   2
   1  15  -2 189.342 351.776   2
  -1  15   1 5153.93 892.826   2
   1  15  -1 7821.85 1126.08   2
  -1  15   0-258.204 315.954   2
   1  15   0-805.618 512.469   2
   1  15   0-295.763 410.817   1
   1  15   1 2881.72 805.212   2
  -1  15  -1 3226.67 635.212   2
   1  15   1 2467.60 687.856   1
   1  15   2 2137.59 799.234   2
  -1  15  -2 3587.35 619.900   2
   1  15   2 3475.80 784.558   1
  -1  15  -3 29482.2 1591.85   2
   1  15   3 27026.3 2434.09   2
   1  15   3 26047.2 2057.11   1
   1  15   4 11545.1 1647.36   2
   1  15   4 10247.4 1296.71   1
   1  15   5 58101.0 3934.15   2
   1  15   5 56556.2 3275.84   1
   1  15   6 71716.5 3883.82   1
   1  15   6 74839.1 4674.19   2
   1  15   7 90870.0 4586.36   1
   1  15   7 91841.3 5441.79   2
   1  15   8 66298.1 3924.70   1
   1  15   8 68439.2 4736.75   2
   1  15   9 94278.3 5012.86   1
   1  15   9 109134. 6174.24   2
  -1  16   9 299.779 476.254   2
  -1  16   9-1736.91 903.608   1
  -1  16   8 1348.61 737.374   1
  -1  16   8-463.516 860.182   2
  -1  16   7 1766.85 785.680   1
  -1  16   7 115.873 595.244   2
  -1  16   6 7872.01 1321.53   1
  -1  16   6 9655.30 1629.36   2
  -1  16   5 2368.38 879.667   1
   1  16  -5 3475.82 658.122   2
  -1  16   5 4429.71 1169.67   2
   1  16  -4 28910.1 1988.92   2
  -1  16   4 25926.7 2374.69   2
  -1  16   4 25195.5 2316.44   1
   1  16  -3 6421.55 1015.91   2
  -1  16   3 5999.37 1100.12   2
  -1  16   3 6199.29 1177.04   1
  -1  16   2 22773.2 2129.55   1
   1  16  -2 24806.5 1977.16   2
  -1  16   2 24719.2 2084.82   2
   1  16  -1 375.793 466.924   2
  -1  16   1 449.208 492.761   1
  -1  16   1 990.249 429.058   2
   1  16   0 9219.89 1210.92   1
   1  16   0 6997.96 1192.90   2
  -1  16   0 7795.61 1085.47   2
   1  16   1 652.743 497.875   1
   1  16   1-899.801 732.025   2
  -1  16  -1 364.118 443.914   2
  -1  16  -2 33807.0 1938.53   2
   1  16   2 29714.3 2538.40   2
   1  16   2 33312.2 2340.77   1
   1  16   3 5614.11 998.417   1
   1  16   3 7884.11 1343.64   2
   1  16   4 43472.2 2811.43   1
   1  16   4 42455.2 3307.42   2
   1  16   5 6817.95 1135.91   1
   1  16   5 7857.97 1498.52   2
   1  16   6 2187.56 805.508   1
   1  16   6 3255.70 1155.92   2
   1  16   7 838.278 746.448   2
   1  16   7 93.4497 534.251   1
   1  16   8 11838.4 1649.36   1
   1  16   8 9612.66 1838.54   2
  -1  17   7 3272.66 1075.29   1
  -1  17   7 2197.09 1061.65   2
  -1  17   6 39131.0 3100.64   1
  -1  17   6 40158.8 3297.52   2
  -1  17   5 6808.66 1346.13   2
  -1  17   5 3977.87 1097.01   1
  -1  17   4 24550.4 2350.98   1
  -1  17   4 24655.8 2333.96   2
  -1  17   3-103.926 365.004   2
   1  17  -3-102.561 358.545   2
  -1  17   3 143.196 494.634   1
   1  17  -2 8111.40 1196.85   2
  -1  17   2 8439.49 1237.48   2
  -1  17   2 7742.51 1326.70   1
  -1  17   1 3795.06 827.778   2
   1  17  -1 4967.87 953.629   2
  -1  17   1 2782.31 845.290   1
   1  17  -1 2372.79 644.297   1
  -1  17   0 1503.96 547.898   2
   1  17   0 1682.11 577.352   2
   1  17   0 1883.37 610.561   1
   1  17   1-791.753 456.949   1
   1  17   1 281.779 544.850   2
   1  17   2 6373.11 1293.78   2
   1  17   2 5417.82 949.775   1
   1  17   3 3816.29 899.665   1
   1  17   3 3818.57 1087.07   2
   1  17   4 56362.1 3326.92   1
   1  17   4 54351.9 3833.42   2
   1  17   5 1114.56 857.658   2
   1  17   5 1077.15 579.917   1
   1  17   6 155822. 7515.82   2
   1  17   6 153825. 6429.61   1
  -1  18   5 886.002 641.873   1
  -1  18   5 51.7346 613.119   2
  -1  18   4 26589.3 2527.98   2
  -1  18   4 31130.5 2674.00   1
  -1  18   3-995.219 686.593   1
  -1  18   3-1143.66 659.454   2
  -1  18   2 50984.6 3225.86   2
  -1  18   2 46972.5 3307.54   1
   1  18  -1-1441.41 629.215   1
  -1  18   1 124.318 612.166   1
   1  18  -1-116.628 363.785   2
   1  18   0 22990.4 2154.35   2
   1  18   0 21799.2 1958.13   1
   1  18   1-246.975 470.650   1
   1  18   1-1891.28 847.412   2
   1  18   2 21659.1 2269.43   2
   1  18   3 9488.17 1554.73   2
   1  18   4 17060.9 2183.81   2
  -2   0  17-1302.31 1010.84   1
  -2   0  16 6754.85 1513.79   1
  -2   0  15-988.150 742.842   1
  -2   0  14 52919.6 3765.59   1
  -2   0  13-772.561 753.806   1
  -2   0  12 120537. 5557.39   1
  -2   0  11 716.559 698.340   1
  -2   0  10 35746.2 2550.34   1
   2   0 -10 38525.8 2564.60   1
   2   0  -9 3097.85 733.079   1
   2   0  -8 58225.5 2934.80   1
   2   0  -7 619.014 454.814   1
   2   0  -6 432256. 11775.2   1
   2   0  -5 535.641 320.409   1
   2   0  -4 531904. 13608.4   1
   2   0  -3 556.251 254.650   1
   2   0  -2 50113.2 1661.94   1
  -2   0   2 44685.6 1711.05   2
  -2   0   1 53.6313 141.277   2
  -2   0   0 622.309 194.533   2
  -2   0  -1 238.453 176.265   2
  -2   0  -2 345326. 9376.98   2
  -2   0  -2 394965. 9688.20   1
   2   0   3 708.808 323.888   2
  -2   0  -3 671.992 345.814   1
  -2   0  -4 49229.6 2294.27   1
   2   0   4 46712.4 2021.93   2
  -2   0  -5 127.678 309.942   1
  -2   0  -6 4077.28 760.925   1
   2   0   7 323.837 419.939   1
  -2   0  -7-141.139 434.727   1
   2   0   8 10178.4 1291.89   1
  -2   0  -8 12765.6 1439.89   1
   2   0   9-275.621 527.997   1
   2   0  10 14898.5 1753.45   1
   2   0  11-233.275 795.569   1
   2   0  12 98510.7 5251.01   1
   2   0  13-471.179 767.288   1
   2   0  14 172325. 7139.45   2
   2   0  14 164343. 7701.74   1
   2   0  15 425.008 775.816   2
  -2  -1  17 5405.11 1598.05   1
  -2   1  17 6646.77 1637.52   1
  -2   1  16 6527.68 1543.27   1
  -2  -1  16 2282.07 1063.00   1
  -2   1  15 18794.5 2297.79   1
  -2  -1  15 17696.0 2277.90   1
  -2   1  14 26438.0 2590.72   1
  -2  -1  14 19703.0 2308.19   1
  -2   1  13 18491.5 2132.35   1
  -2  -1  13 18476.5 2109.00   1
  -2   1  12 190505. 7529.56   1
  -2  -1  12 195655. 7649.40   1
  -2  -1  11 52388.4 3321.04   1
  -2   1  11 59677.3 3483.36   1
   2   1 -10 527361. 15241.8   1
  -2   1  10 525060. 15327.2   1
  -2  -1  10 534130. 15390.9   1
   2  -1 -10 532567. 15280.6   1
   2   1  -9 32345.5 2179.75   1
   2  -1  -9 24285.6 1947.07   1
   2  -1  -8 488956. 14210.6   1
   2   1  -8 537764. 14335.0   1
   2   1  -7 136039. 4901.40   1
   2  -1  -7 144518. 5028.12   1
   2   1  -6 199342. 6068.17   1
   2  -1  -6 187115. 6059.41   1
   2  -1  -5 117749. 4025.90   1
   2   1  -5 119911. 3957.18   1
   2  -1  -4 10296.3 823.705   1
   2   1  -4 9717.58 760.586   1
   2  -1  -3 10390.6 749.535   1
   2   1  -3 10532.7 678.965   1
  -2  -1   3 9577.63 727.268   2
  -2  -1   2 35593.0 1496.01   2
   2   1  -2 39193.1 1312.33   1
  -2   1   1 177.293 136.185   2
  -2  -1   1 420.778 215.522   2
  -2   1   0 110786. 3097.32   2
  -2  -1   0 114058. 3355.91   2
  -2  -1  -1 24926.4 1177.87   2
  -2  -1  -1 26611.9 1099.05   1
  -2   1  -1 25362.2 1001.99   2
   2  -1   1 24463.0 1001.91   2
   2  -1   2 145787. 4225.82   2
  -2   1  -2 157209. 4268.09   2
   2   1   2 154860. 4507.95   1
  -2  -1  -2 164610. 4590.59   2
  -2  -1  -2 155186. 4530.61   1
   2  -1   3 157855. 4512.61   2
  -2  -1  -3 161302. 4887.03   1
  -2   1  -3 160546. 4982.05   1
   2   1   3 156405. 4838.20   1
   2   1   4 190009. 5803.94   1
   2   1   4 198419. 5712.39   2
   2  -1   4 173882. 5292.94   2
  -2  -1  -4 180874. 5749.05   1
  -2   1  -4 189201. 5891.53   1
  -2   1  -5 155.243 251.154   1
   2   1   5 262.476 369.688   1
  -2  -1  -5 130.670 279.040   1
   2   1   5-203.246 339.499   2
   2   1   6 44167.8 2442.24   1
  -2   1  -6 45103.3 2525.72   1
  -2  -1  -6 44760.3 2492.29   1
  -2   1  -7 31448.4 2183.66   1
  -2  -1  -7 35084.0 2275.36   1
   2   1   7 30456.2 2139.55   1
   2   1   8 3673.91 850.373   1
  -2  -1  -8 4249.07 874.220   1
   2  -1   8 4400.62 915.278   1
  -2   1  -8 4170.40 888.398   1
   2   1   9-344.342 528.110   1
   2  -1   9 126.819 477.168   1
   2   1  10 14036.0 1671.59   1
   2  -1  10 16314.6 1851.86   1
   2   1  11 15968.5 1929.07   1
   2  -1  11 18786.4 2080.92   1
   2   1  12 44752.8 3343.20   1
   2   1  13 5173.19 1252.58   1
   2   1  14 10030.4 1848.14   1
   2   1  14 9121.17 1550.61   2
   2  -1  15 129.678 626.573   2
   2   1  15 1607.65 985.180   1
   2   1  15 261.099 695.822   2
  -2  -2  17 1770.68 1269.02   1
  -2   2  17 1896.49 930.911   1
  -2  -2  16 67341.7 4707.74   1
  -2   2  16 68062.9 4643.99   1
  -2  -2  15-123.673 893.145   1
  -2   2  15-55.6250 524.514   1
  -2  -2  14 58329.4 3983.87   1
  -2   2  14 53354.4 3828.53   1
  -2  -2  13 905.153 820.869   1
  -2   2  13 1279.04 809.462   1
  -2   2  12 60233.5 3741.69   1
  -2  -2  12 65843.2 3874.28   1
  -2   2  11 1618.98 725.009   1
  -2  -2  11 932.207 777.410   1
   2   2 -10 5448.03 977.688   1
  -2   2  10 4708.29 1016.77   1
  -2  -2  10 5132.45 1044.14   1
   2  -2 -10 4231.97 882.111   1
   2  -2  -9 33248.2 2278.84   1
   2   2  -9 29164.8 2103.47   1
  -2  -2   9 34201.8 2311.36   1
   2  -2  -8 45799.1 2585.58   1
   2   2  -8 46398.8 2554.66   1
  -2  -2   8 46492.0 2626.09   1
   2  -2  -7 25700.9 1775.97   1
   2   2  -7 25801.9 1734.38   1
   2   2  -6 127831. 4404.15   1
  -2  -2   6 117123. 4380.19   1
   2  -2  -5 292.588 294.406   1
  -2  -2   5 212.339 324.116   1
   2   2  -4 213058. 5868.48   1
  -2  -2   4 216027. 5950.01   1
  -2  -2   4 213288. 5989.48   2
   2   2  -3 78327.9 2483.69   1
   2  -2  -3 82402.7 2796.19   1
  -2  -2   3 80767.4 2548.27   1
  -2  -2   3 78316.7 2710.22   2
   2   2  -2 172098. 4509.26   1
  -2  -2   2 175625. 4544.99   1
  -2  -2   2 182177. 4998.56   2
  -2  -2   1 16367.2 932.256   2
  -2   2   0 303340. 7601.42   2
  -2  -2   0 311603. 8107.59   2
  -2   2  -1 217868. 5535.64   2
  -2  -2  -1 227071. 5742.43   1
   2  -2   1 209982. 5524.78   2
  -2  -2  -1 215277. 6118.43   2
   2  -2   2 443473. 11007.8   2
  -2  -2  -2 452977. 11429.1   1
   2   2   2 430551. 11377.1   1
   2   2   3 225081. 6439.03   1
   2  -2   3 229391. 5958.61   2
  -2  -2  -3 220771. 6428.25   1
   2  -2   4 141250. 4002.69   2
   2   2   4 127786. 4407.85   1
  -2  -2  -4 134557. 4486.95   1
  -2   2  -4 128515. 4627.14   1
   2   2   5 73522.0 3111.07   1
  -2  -2  -5 75146.3 3162.48   1
   2   2   5 74123.9 3126.16   2
  -2   2  -5 74323.5 3287.23   1
  -2   2  -6 1358.50 521.238   1
  -2  -2  -6 660.687 377.925   1
   2   2   6 493.925 378.739   1
   2   2   6 893.509 438.480   2
  -2  -2  -7 6718.68 981.588   1
   2   2   7 4298.17 841.501   1
  -2   2  -7 4518.54 823.358   1
  -2  -2  -8 395.098 372.027   1
   2   2   8 519.833 532.282   1
  -2   2  -8-394.786 422.928   1
   2   2   9 72702.0 3835.01   1
   2   2  10 5324.02 1140.82   1
   2   2  11 56546.5 3629.28   1
   2   2  12 34251.7 2911.93   1
   2   2  13 37260.5 3151.43   1
   2   2  13 34124.9 2846.35   2
   2   2  14 59881.5 4250.92   1
   2   2  14 61318.5 4033.60   2
   2   2  15 23451.6 2592.36   2
   2   2  15 25423.1 2775.41   1
   2  -2  15 22720.8 2234.34   2
  -2  -3  17-2146.94 1172.18   1
  -2   3  17 456.626 683.120   1
  -2  -3  16 4659.60 1408.01   1
  -2   3  16 4075.97 1209.09   1
  -2   3  15 28058.2 2854.86   1
  -2  -3  15 29352.1 2952.40   1
  -2  -3  14 553.454 820.398   1
  -2   3  14 41.6014 729.916   1
  -2  -3  13 106137. 5412.35   1
  -2   3  13 99831.3 5232.90   1
  -2  -3  12 3517.58 968.814   1
  -2   3  12 2635.26 945.045   1
  -2  -3  11 96353.8 4726.97   1
  -2   3  11 93952.5 4623.32   1
  -2   3  10 41416.1 2754.45   1
   2   3 -10 42035.2 2685.07   1
  -2  -3  10 37992.4 2657.59   1
   2   3  -9 44204.5 2612.63   1
   2  -3  -9 40007.5 2540.56   1
  -2  -3   9 40087.2 2585.86   1
   2   3  -8 149561. 5272.16   1
   2  -3  -8 142588. 5311.54   1
   2  -3  -7 87584.1 3767.01   1
   2   3  -7 96699.8 3777.13   1
  -2  -3   7 95569.9 3849.92   1
   2  -3  -6 678.281 354.256   1
  -2  -3   6 498.022 426.913   1
  -2  -3   6 435.685 330.558   2
   2   3  -6 25.7490 306.581   1
  -2  -3   5 268197. 7873.05   1
   2  -3  -5 256045. 7966.81   1
  -2  -3   5 282804. 7830.54   2
   2  -3  -4 55198.4 2351.68   1
   2   3  -4 54143.3 2122.34   1
  -2  -3   4 57482.2 2204.31   1
  -2  -3   4 54917.1 2224.32   2
  -2  -3   3 327298. 8658.83   2
  -2  -3   3 336090. 8398.48   1
   2   3  -3 309810. 8300.46   1
   2   3  -2 17080.8 724.284   1
  -2  -3   2 18058.9 1048.63   2
  -2  -3   2 18048.2 740.652   1
  -2  -3   1 1490.55 335.645   2
  -2  -3   0 46495.1 1913.29   2
  -2  -3  -1 272052. 6833.72   1
   2   3   1 267666. 6830.72   1
  -2  -3  -1 262397. 7402.57   2
   2   3   2 290487. 7619.28   1
  -2  -3  -2 287520. 8054.22   2
  -2  -3  -2 289549. 7627.01   1
   2  -3   3 141749. 3782.78   2
   2   3   3 146534. 4414.66   1
  -2  -3  -3 136364. 4343.43   1
  -2  -3  -4 326504. 9005.09   1
  -2   3  -4 317741. 9319.13   1
   2  -3   4 321339. 8274.44   2
   2   3   4 323780. 8988.48   1
   2   3   5 166641. 5352.61   1
  -2  -3  -5 161144. 5355.34   1
  -2   3  -5 151864. 5535.19   1
   2   3   6 63301.5 2965.92   1
   2   3   6 58115.7 2945.10   2
  -2   3  -6 61128.8 3106.34   1
  -2  -3  -6 65654.5 3014.37   1
  -2   3  -7 105717. 4511.24   1
   2   3   7 106522. 4347.42   2
  -2  -3  -7 106849. 4341.63   1
  -2   3  -8 84940.4 4095.69   1
   2   3   8 81386.1 3876.25   1
   2   3   8 82287.6 3890.39   2
  -2  -3  -8 80334.9 3877.26   1
   2   3   9 15340.7 1640.83   2
   2   3   9 13594.5 1567.95   1
   2   3  10 204167. 7533.37   2
   2   3  10 199708. 7619.05   1
   2   3  11 1293.86 722.102   1
   2   3  11 393.831 635.580   2
   2   3  12 101061. 5312.81   1
   2   3  12 105531. 5221.03   2
   2   3  13 917.305 720.774   1
   2   3  13 1636.64 853.174   2
   2   3  14 11783.8 1745.53   2
   2   3  14 8455.84 1638.05   1
   2  -3  15 1223.98 626.555   2
   2   3  15 35.8038 730.557   2
   2   3  15 878.913 607.502   1
  -2  -4  17 54008.3 4315.44   1
  -2   4  17 47322.4 4073.47   1
  -2   4  16 39419.3 3534.41   1
  -2  -4  16 38492.1 3528.94   1
  -2  -4  15 73722.5 4755.08   1
  -2   4  15 68782.0 4602.39   1
  -2   4  14 27196.7 2723.04   1
  -2  -4  14 33651.6 2995.14   1
  -2  -4  13 1077.42 703.913   1
  -2   4  13 2902.91 957.313   1
  -2   4  12 39448.5 2983.15   1
  -2  -4  12 42723.5 3129.36   1
  -2  -4  11 1135.18 650.317   1
  -2   4  11-214.018 633.649   1
  -2   4  10 540.476 467.640   1
  -2  -4  10 1248.07 705.621   1
   2   4 -10 1560.48 615.471   1
   2  -4  -9 5664.03 941.136   1
  -2   4   9 4642.70 895.953   1
   2   4  -9 5875.43 942.218   1
  -2  -4   9 5216.51 958.083   1
   2   4  -8 50463.3 2679.74   1
   2  -4  -8 45023.5 2652.90   1
  -2  -4   8 49942.9 2757.18   1
  -2  -4   8 47672.0 2452.94   2
   2   4  -7 25867.4 1741.77   1
  -2  -4   7 26442.0 1632.09   2
   2  -4  -7 25993.8 1813.97   1
  -2  -4   7 25429.5 1808.18   1
  -2  -4   6 151902. 4875.30   2
   2   4  -6 153765. 4989.92   1
  -2  -4   6 147133. 5018.81   1
   2  -4  -6 135440. 5025.99   1
  -2  -4   5 104097. 3693.91   1
   2  -4  -5 106112. 3875.40   1
   2   4  -5 100621. 3581.17   1
  -2  -4   5 103446. 3604.25   2
   2   4  -4 245385. 6862.29   1
  -2  -4   4 248393. 7024.32   2
   2   4  -4 254597. 7035.00   2
  -2  -4   4 246228. 6925.79   1
   2   4  -3 775719. 19498.9   2
  -2  -4   3 770561. 19496.4   2
   2   4  -3 787364. 19135.5   1
   2   4  -2 142341. 3825.88   1
  -2  -4   2 143302. 4374.28   2
  -2  -4   1 404983. 10670.5   2
  -2  -4   0 116844. 3820.72   2
  -2  -4  -1 65453.7 2001.49   1
   2   4   1 62056.0 1982.35   1
  -2  -4  -1 67614.3 2594.21   2
  -2  -4  -2 24723.7 1170.87   1
  -2  -4  -2 24113.0 1477.33   2
   2   4   2 24879.5 1180.91   1
  -2  -4  -3 364276. 9797.23   1
   2   4   3 373909. 9823.50   1
   2   4   4 7316.52 795.750   1
  -2  -4  -4 7947.42 822.624   1
   2  -4   4 7144.34 467.402   2
   2   4   5 131976. 4709.42   1
  -2   4  -5 145360. 5203.46   1
  -2  -4  -5 143560. 4873.81   1
  -2  -4  -6 504.156 522.221   1
  -2   4  -6 1123.47 486.757   1
   2   4   6 2230.59 608.225   1
   2   4   7 865.788 480.178   1
  -2  -4  -7 423.489 464.515   1
  -2   4  -7 570.874 416.289   1
   2   4   7 489.765 481.302   2
   2   4   8 2107.66 758.592   2
   2   4   8 1831.00 710.217   1
   2   4   9 76670.4 4037.93   1
   2   4   9 92266.9 4345.53   2
   2   4  10 1339.64 761.886   1
   2   4  10 1363.99 742.353   2
   2   4  11 134397. 6051.40   1
   2   4  11 138216. 6118.88   2
   2   4  12 4042.31 1098.51   1
   2   4  12 5056.81 1178.53   2
   2   4  13 21612.4 2393.36   1
   2   4  13 22877.9 2413.61   2
   2   4  14 1968.83 893.271   2
   2   4  14 172.389 1013.22   1
   2  -4  15 12527.6 1576.05   2
   2   4  15 13155.1 2014.47   1
   2   4  15 13335.4 1964.22   2
  -2   5  16 295.900 723.045   1
  -2  -5  15 7720.25 1553.71   1
  -2   5  15 4908.01 1313.00   1
  -2  -5  14 611.768 765.586   1
  -2   5  14 268.304 771.350   1
  -2  -5  13 17375.2 2047.86   1
  -2   5  13 13767.4 1843.47   1
  -2  -5  12 7056.86 1281.05   1
  -2   5  12 7888.63 1368.31   1
  -2  -5  11 435.501 584.676   1
  -2   5  11 375.697 468.495   1
  -2  -5  11 192.955 451.551   2
  -2  -5  10 7248.55 1181.29   1
   2   5 -10 5404.95 996.316   1
  -2  -5  10 7811.10 992.559   2
  -2   5  10 6990.54 1159.03   1
  -2   5   9 2174.20 706.661   1
  -2  -5   9 3081.02 623.224   2
   2   5  -9 2361.67 640.604   1
   2  -5  -9 1501.61 636.518   1
  -2  -5   9 1684.45 610.327   1
   2   5  -8 1660.44 534.573   1
  -2  -5   8 778.308 465.499   1
   2  -5  -8 1171.37 484.546   1
  -2  -5   8 1827.44 496.021   2
  -2  -5   7 55504.8 2813.43   1
  -2  -5   7 58412.7 2646.49   2
   2   5  -7 53150.4 2705.76   1
   2  -5  -7 60746.2 2986.63   1
   2   5  -6-91.6123 288.199   1
  -2  -5   6 66.2906 245.931   2
  -2  -5   6-25.2346 445.464   1
   2  -5  -6 100.347 324.290   1
  -2  -5   5 182542. 5565.89   2
   2  -5  -5 183684. 5927.32   1
   2   5  -5 176630. 5538.25   1
   2   5  -4 2578.39 460.399   1
   2   5  -4 1768.44 433.689   2
   2   5  -3 224620. 5983.81   1
   2   5  -3 204373. 6236.99   2
  -2  -5   3 221591. 6329.69   2
   2   5  -2 5253.27 659.503   2
  -2  -5   2 4691.99 589.038   2
   2   5  -2 3251.36 351.628   1
  -2  -5   1 2908.52 494.828   2
   2   5   0 6086.87 410.646   1
  -2  -5   0 7198.27 739.811   2
   2   5   1 55555.2 1870.48   1
  -2  -5  -1 61363.9 2524.73   2
  -2  -5  -2 4112.36 460.904   1
   2   5   2 3875.49 453.926   1
  -2  -5  -2 4612.76 668.223   2
  -2  -5  -3 114584. 3708.55   1
   2   5   3 112211. 3689.80   1
  -2  -5  -4 37055.8 1876.66   1
   2   5   4 34994.2 1811.53   1
  -2  -5  -5 249851. 7472.28   1
  -2   5  -5 239366. 7858.79   1
   2   5   5 244233. 7408.49   1
  -2   5  -6 23703.1 1899.80   1
   2   5   6 23872.3 1705.42   1
  -2  -5  -6 24377.8 1741.41   1
  -2  -5  -7 587937. 15666.0   1
   2   5   7 554815. 15864.2   2
   2   5   7 543268. 15452.6   1
  -2   5  -7 551725. 15949.5   1
  -2  -5  -8 44265.3 2750.40   1
   2   5   8 48274.3 2982.67   2
   2   5   8 43630.9 2722.92   1
   2   5   9 348220. 10960.1   1
   2   5   9 342248. 11172.1   2
   2   5  10 19574.3 2023.24   2
   2   5  10 19652.6 1956.92   1
   2   5  11 95856.6 4933.58   1
   2   5  11 103586. 5188.94   2
   2   5  12 728.632 751.867   1
   2   5  12 2929.28 1021.17   2
   2   5  13 1820.95 818.703   2
   2   5  13 2484.80 951.626   1
   2   5  14 2356.09 983.461   1
   2   5  14 2890.29 1029.08   2
   2  -5  14 3813.24 831.291   2
   2   5  15-784.879 703.672   1
   2   5  15-1842.95 980.089   2
  -2   6  16 1666.35 889.589   1
  -2   6  15 89343.7 5367.85   1
  -2   6  14 5257.23 1273.44   1
  -2   6  13 23916.5 2460.93   1
  -2   6  12 1882.06 859.783   1
  -2  -6  12 2567.84 727.558   2
  -2  -6  11 790.928 461.318   2
  -2   6  11 40.3536 445.498   1
  -2  -6  10 1978.38 547.310   2
  -2   6  10 1258.08 557.784   1
  -2   6   9 2536.17 754.900   1
   2   6  -9 3479.15 775.732   1
  -2  -6   8 3087.80 613.985   2
   2  -6  -8 4354.18 836.460   1
  -2   6   8 3680.00 808.975   1
   2   6  -8 4407.62 752.313   1
   2   6  -7 200.355 315.378   1
   2  -6  -7 107.463 339.715   1
  -2   6   7-26.7081 401.282   1
  -2  -6   7 443.574 264.082   2
   2  -6  -6 23461.4 1723.75   1
  -2  -6   6 23356.8 1491.90   2
   2   6  -6 23605.8 1590.38   1
  -2  -6   5 128302. 4320.23   2
   2   6  -5 127607. 4343.48   1
   2   6  -5 128307. 4287.39   2
   2   6  -4 41545.2 1995.52   2
   2   6  -4 42363.6 1927.51   1
   2   6  -3 506469. 13264.1   2
   2   6  -3 513619. 12915.6   1
  -2  -6   3 495124. 13259.7   2
   2   6  -2 56856.9 2377.35   2
  -2  -6   2 54089.9 2345.29   2
   2   6  -1 714737. 18100.8   2
  -2  -6   1 697871. 18063.5   2
   2   6   0 34426.4 1291.78   1
   2   6   0 33835.0 1827.63   2
  -2  -6   0 31845.2 1763.70   2
  -2   6  -1 233590. 5959.19   2
   2   6   1 253259. 6398.23   1
  -2  -6  -1 240369. 7180.41   2
  -2  -6  -2 13320.2 1195.95   2
  -2  -6  -2 15024.8 927.209   1
   2   6   2 15451.7 952.003   1
   2   6   3 53956.6 2246.14   1
  -2  -6  -3 59580.1 2334.60   1
  -2  -6  -4 11478.9 1014.53   1
   2   6   4 11926.2 1008.50   1
   2  -6   5 23581.0 875.652   2
   2  -6   5 24234.3 869.952   2
  -2   6  -5 23897.6 1849.46   1
   2   6   5 25769.8 1647.12   1
  -2  -6  -5 24020.4 1605.11   1
   2   6   6 16819.6 1453.00   1
   2  -6   6 18355.7 910.362   2
  -2   6  -6 18543.2 1704.51   1
  -2  -6  -6 18876.3 1535.40   1
  -2  -6  -7 1097.03 504.456   1
   2   6   7 1808.60 757.852   2
   2   6   7 864.835 585.917   1
   2   6   8 10949.1 1320.81   1
  -2  -6  -8 9022.72 1234.82   1
   2   6   8 12575.8 1569.47   2
   2   6   9 65013.6 3587.46   1
   2   6   9 67694.0 3853.10   2
   2   6  10 165.005 686.972   1
   2   6  10-1137.41 757.467   2
   2   6  11 56424.3 3596.50   1
   2   6  11 52060.3 3640.21   2
   2   6  12 2319.12 966.203   1
   2   6  12 987.505 512.391   2
   2   6  13 9253.09 1680.74   2
   2   6  13 10074.1 1645.59   1
   2   6  14 174.204 613.837   1
   2   6  14-814.671 699.637   2
  -2   7  16 384.068 784.807   1
  -2   7  15 7150.40 1566.70   1
  -2   7  14 11192.9 1834.96   1
  -2   7  13 22302.2 2437.49   1
  -2  -7  12 2001.68 637.408   2
  -2   7  12 3272.57 1014.20   1
  -2   7  11 27302.4 2457.26   1
  -2  -7  11 28844.9 2151.77   2
  -2  -7  10 355.458 395.420   2
  -2   7  10-394.563 495.882   1
  -2   7   9 18022.9 1842.67   1
  -2  -7   9 24290.2 1740.48   2
   2   7  -9 23209.1 1927.70   1
   2   7  -8 2427.18 648.321   1
  -2  -7   8 2292.95 548.585   2
  -2   7   8 1868.45 689.430   1
   2  -7  -8 3033.67 767.790   1
   2   7  -7 73307.4 3270.97   1
  -2   7   7 66689.1 3388.33   1
   2  -7  -7 66952.1 3359.81   1
  -2  -7   7 64096.8 2892.99   2
  -2   7   6 35445.8 2260.11   1
   2   7  -6 36883.8 2074.31   1
  -2  -7   6 35593.4 1934.75   2
  -2  -7   5 79087.9 3173.50   2
  -2   7   5 80044.4 3546.60   1
   2   7  -5 79122.1 3118.21   2
   2   7  -5 86633.5 3285.43   1
   2   7  -4 22943.9 1399.76   1
  -2  -7   4 26273.0 1559.45   2
   2   7  -4 23175.8 1454.69   2
   2   7  -3 37695.3 1901.48   2
  -2   7   3 35695.7 2062.07   1
  -2  -7   3 35797.9 1867.46   2
   2   7  -3 37540.4 1682.27   1
  -2  -7   2 3629.80 575.213   2
   2   7  -2 2853.08 525.942   2
  -2  -7   1 403.461 278.009   2
   2   7  -1 1648.72 456.395   2
   2   7   0 7157.09 860.276   2
  -2  -7   0 8516.02 913.615   2
   2   7   0 9153.88 647.900   1
  -2   7   0 9660.23 665.138   2
  -2   7  -1 45772.4 1480.96   2
   2   7   1 44915.8 1765.83   1
  -2  -7  -1 41330.8 2230.98   2
   2   7   1 45831.6 2354.79   2
   2   7   2 55654.7 2171.15   1
   2   7   3 178094. 5417.10   1
  -2  -7  -3 181404. 5464.41   1
   2   7   4 7262.56 822.937   1
  -2  -7  -4 6801.03 786.186   1
   2   7   5 225083. 7113.45   1
  -2  -7  -5 238064. 7217.67   1
   2  -7   6 34907.7 1182.44   2
   2   7   6 34057.4 2464.85   2
   2   7   6 37096.1 2184.39   1
   2  -7   6 33873.8 1161.34   2
  -2   7  -6 39180.5 2536.56   1
  -2  -7  -6 34508.9 2144.93   1
   2  -7   7 267247. 7054.67   2
   2   7   7 270781. 9185.11   2
  -2  -7  -7 289613. 8782.27   1
   2   7   7 256293. 8494.26   1
  -2  -7  -8 24684.4 2015.76   1
   2  -7   8 24719.0 1269.85   2
   2   7   8 19827.5 2013.45   2
   2   7   8 23892.3 1956.25   1
   2   7   9 132091. 5629.23   1
   2  -7   9 142925. 4502.72   2
   2   7   9 134371. 6039.15   2
   2   7  10 36963.6 2762.76   1
   2   7  10 35737.1 2929.06   2
   2   7  11 12537.9 1791.34   2
   2   7  11 11627.0 1603.75   1
   2   7  12 53460.6 3731.39   1
   2   7  12 60728.2 4111.31   2
   2   7  13 1938.67 885.903   1
   2   7  13 326.595 936.033   2
   2   7  14 6986.37 1476.92   1
   2   7  14 9937.25 1795.57   2
  -2   8  15 14059.0 2123.71   1
  -2   8  14 43026.6 3530.96   1
  -2   8  13 7681.54 1588.53   1
  -2   8  12 49002.7 3526.85   1
  -2  -8  12 52687.5 3086.44   2
  -2  -8  11 4897.13 879.743   2
  -2   8  11 2803.85 948.880   1
  -2   8  10 2106.87 728.503   1
  -2  -8  10 1299.20 466.584   2
   2   8  -9 3295.88 787.804   1
  -2   8   9 1614.17 834.453   1
  -2  -8   9 2906.10 657.489   2
  -2  -8   8 66471.2 3061.68   2
   2   8  -8 73008.1 3491.92   1
  -2   8   8 69755.8 3651.47   1
   2   8  -7 2254.92 560.955   1
  -2   8   7 1574.66 695.424   1
  -2  -8   7 1262.11 453.491   2
   2   8  -6 149413. 5207.50   1
  -2  -8   6 146094. 4996.95   2
  -2   8   6 145591. 5552.81   1
  -2  -8   5 44108.9 2203.63   2
   2   8  -5 40620.0 2118.20   2
   2   8  -5 48726.7 2318.01   1
  -2   8   5 42220.5 2484.87   1
   2   8  -4 76838.2 3094.92   2
   2   8  -4 78596.7 3012.15   1
  -2   8   4 77455.1 3451.11   1
  -2  -8   4 74685.2 3085.70   2
   2   8  -3 142055. 4748.29   2
  -2  -8   3 138303. 4726.60   2
  -2   8   3 139133. 5031.19   1
  -2  -8   2 36307.0 1947.94   2
   2   8  -2 34120.3 1906.15   2
   2   8  -1 130366. 4590.53   2
  -2   8   1 130376. 4165.44   2
  -2  -8   1 130519. 4564.95   2
  -2   8   0 67801.9 2348.05   2
   2   8   0 69770.5 2407.83   1
   2   8   0 65387.4 2977.93   2
  -2  -8   0 59582.3 2846.07   2
   2   8   1 135809. 4079.04   1
   2   8   1 127961. 4805.24   2
  -2  -8  -1 129458. 4776.78   2
  -2   8  -1 131508. 3698.35   2
   2   8   2 42104.0 1864.93   1
   2   8   2 38219.2 2328.39   2
   2   8   3 103364. 3642.41   1
   2   8   3 104458. 4361.21   2
   2   8   4 6401.97 1067.57   2
   2   8   4 6570.74 808.857   1
  -2  -8  -4 6843.98 832.071   1
   2   8   5 107252. 4702.02   2
  -2  -8  -5 107941. 4105.40   1
   2   8   5 101956. 4000.01   1
   2   8   6 13325.4 1308.76   1
   2   8   6 14135.8 1602.41   2
  -2  -8  -6 16321.3 1460.82   1
   2   8   7-15.2064 424.348   1
   2  -8   7 383.831 118.958   2
  -2  -8  -7-187.895 389.228   1
   2   8   7 920.158 656.040   2
   2  -8   7 383.515 113.672   2
   2  -8   8 7119.35 544.371   2
   2  -8   8 7659.23 565.512   2
   2   8   8 7039.38 1112.57   1
   2   8   8 9436.84 1415.24   2
  -2  -8  -8 8938.29 1222.12   1
   2   8   9 56354.1 3299.40   1
   2  -8   9 55163.2 2120.78   2
   2   8   9 53849.8 3589.28   2
   2   8  10 10870.6 1509.15   1
   2   8  10 9924.97 1610.59   2
   2   8  11 60043.3 3824.51   1
   2  -8  11 64393.6 2646.62   2
   2   8  12 1367.31 1066.18   2
   2   8  12 1295.64 822.858   1
   2   8  13 59421.8 4101.40   1
   2   8  13 60818.6 4421.49   2
   2   8  14 4767.87 1364.64   1
   2   8  14 3889.41 1284.59   2
  -2   9  15 20356.8 2570.79   1
  -2   9  14 1779.74 982.490   1
  -2   9  13 88480.9 5124.76   1
  -2   9  12 29097.2 2759.46   1
  -2   9  11 127388. 6036.86   1
  -2  -9  11 138960. 5283.09   2
  -2  -9  10 190996. 6600.85   2
  -2   9  10 202510. 7712.65   1
  -2   9   9 181149. 7258.73   1
  -2  -9   9 201043. 6540.00   2
   2   9  -8 128868. 5129.27   1
  -2  -9   8 129928. 4705.67   2
  -2   9   8 116843. 5254.27   1
  -2   9   7 182413. 6750.40   1
   2   9  -7 175070. 6246.08   1
  -2  -9   7 182234. 5970.53   2
   2   9  -6 19258.8 1549.81   1
  -2   9   6 22113.4 1876.05   1
  -2  -9   6 20373.2 1483.31   2
   2   9  -5 106098. 4058.29   1
  -2   9   5 100607. 4398.55   1
   2   9  -5 110993. 4041.39   2
  -2  -9   5 111378. 4065.66   2
   2   9  -4 10099.3 963.233   1
   2   9  -4 9828.10 1003.64   2
  -2   9   4 10801.6 1215.43   1
  -2  -9   4 11105.3 1060.27   2
   2   9  -3 36722.9 2055.42   2
  -2   9   3 36122.6 2239.24   1
  -2  -9   3 40971.7 2130.49   2
   2   9  -2 333.951 368.177   2
  -2  -9   2 377.024 250.958   2
  -2   9   2-255.572 281.381   2
  -2  -9   1 1978.27 516.923   2
  -2   9   1 1673.62 387.887   2
   2   9  -1 1352.91 460.265   2
  -2  -9   0 530.173 401.221   2
  -2   9   0 604.721 331.479   2
   2   9   0 474.228 255.582   1
   2   9   0 86.7224 397.346   2
  -2   9  -1 2406.85 356.460   2
  -2  -9  -1 2715.54 646.298   2
   2   9   1 2854.42 734.356   2
   2   9   1 2271.66 425.448   1
   2   9   2 51591.2 2261.77   1
   2   9   2 51741.1 2855.36   2
  -2   9  -2 53997.2 1662.37   2
   2   9   3 20041.2 1342.76   1
   2   9   3 19345.3 1730.78   2
   2   9   4 56891.5 2624.60   1
   2   9   4 57761.9 3236.53   2
   2   9   5 47691.8 3023.94   2
  -2  -9  -5 48542.6 2532.97   1
   2   9   5 47971.8 2505.92   1
   2   9   6 38130.4 2313.46   1
   2   9   6 40515.0 2854.25   2
  -2  -9  -6 39168.4 2360.94   1
  -2  -9  -7 13178.3 1398.74   1
   2   9   7 8800.31 1168.42   1
   2   9   7 10171.6 1496.35   2
  -2  -9  -8 31816.5 2332.98   1
   2   9   8 32016.2 2666.56   2
   2   9   8 31282.0 2301.62   1
   2  -9   9 14511.9 740.876   2
   2  -9   9 15017.0 770.228   2
   2   9   9 14207.4 1838.08   2
   2   9   9 13412.9 1582.63   1
   2   9  10 49658.6 3627.44   2
   2   9  10 48698.8 3229.51   1
   2   9  11 29.9529 711.961   2
   2   9  11-406.696 715.856   1
   2   9  12 45815.9 3506.59   1
   2   9  12 61338.3 4281.86   2
   2   9  13 1649.61 1190.72   2
   2   9  13 861.330 781.652   1
  -2  10  15 7265.99 1566.89   1
  -2  10  14 29130.5 3014.53   1
  -2  10  13 7922.44 1590.82   1
  -2  10  12 44912.6 3452.94   1
  -2  10  11 649.672 770.426   1
  -2 -10  10 38911.8 2354.98   2
  -2  10  10 35657.3 2896.61   1
  -2  10   9 400.907 614.430   1
  -2 -10   9 1866.06 577.380   2
  -2 -10   8 28229.2 1858.85   2
   2  10  -8 25132.1 2021.67   1
  -2  10   8 26176.6 2271.76   1
   2  10  -7 1892.83 624.934   1
  -2 -10   7 1004.73 435.759   2
  -2  10   7 2117.88 771.043   1
  -2 -10   6 124029. 4609.04   2
  -2  10   6 128629. 5298.09   1
   2  10  -6 126099. 4584.27   2
   2  10  -6 135613. 4943.30   1
  -2  10   5 352.602 480.417   1
   2  10  -5 430.365 390.565   2
   2  10  -5 516.381 411.377   1
  -2 -10   5 1317.66 425.831   2
   2  10  -4 79313.0 3371.71   2
   2  10  -4 81456.1 3311.95   1
  -2  10   4 82428.8 3808.86   1
  -2 -10   4 85657.7 3464.36   2
   2  10  -3 21857.2 1575.97   2
  -2 -10   3 20522.2 1513.30   2
  -2  10   3 21789.2 1776.90   1
  -2  10   3 22195.5 1640.20   2
  -2  10   2 90124.1 3594.44   2
  -2 -10   2 92931.7 3752.24   2
   2  10  -2 93975.0 3798.30   2
   2  10  -1 77193.8 3439.01   2
  -2  10   1 77062.4 3023.71   2
  -2 -10   1 80606.6 3469.22   2
   2  10   0 98036.6 3380.52   1
  -2  10   0 96403.8 3297.73   2
   2  10   0 94443.4 4018.49   2
  -2 -10   0 90885.4 3926.08   2
   2  10   1 35211.0 1797.21   1
   2  10   1 35646.8 2309.85   2
  -2  10  -1 38438.5 1591.07   2
   2  10   2 75825.0 3679.71   2
  -2  10  -2 75045.1 2307.86   2
   2  10   2 74773.7 2969.20   1
   2  10   3 14361.1 1167.70   1
   2  10   3 14466.2 1555.54   2
   2  10   4 4913.06 767.162   1
   2  10   4 6129.71 1091.48   2
   2  10   5 10881.9 1144.33   1
   2  10   5 10958.6 1471.88   2
   2  10   6 1598.71 574.551   1
   2  10   6 1085.19 571.954   2
   2  10   7 2522.43 686.557   1
   2  10   7 2160.91 802.471   2
  -2 -10  -7 2538.21 660.037   1
   2  10   8-1693.96 830.270   2
   2  10   8-478.129 513.689   1
   2  10   9 4653.92 990.975   1
   2  10   9 4685.12 1208.92   2
   2  10  10 1637.56 943.858   2
   2  10  10 1322.48 746.713   1
   2  10  11 6758.62 1307.00   1
   2  10  11 7215.56 1545.94   2
   2  10  12 49209.7 3631.59   1
   2  10  12 57713.4 4253.24   2
   2  10  13 25809.3 2874.98   2
   2  10  13 18654.2 2250.60   1
  -2  11  14 39429.0 3501.77   1
  -2  11  13 5952.19 1369.97   1
  -2  11  12 130627. 6437.35   1
  -2  11  11 13735.8 1884.90   1
  -2  11  10 323147. 11189.3   1
  -2  11   9 18052.8 2022.44   1
  -2 -11   9 22902.1 1721.97   2
   2  11  -8 285549. 9367.37   1
  -2 -11   8 299542. 8838.84   2
  -2  11   8 270745. 9736.68   1
  -2  11   7 4417.99 982.214   1
   2  11  -7 5178.06 893.256   1
  -2 -11   7 5574.82 852.352   2
  -2  11   6 81561.9 4187.55   1
   2  11  -6 87416.8 3630.52   2
   2  11  -6 83554.9 3800.98   1
  -2 -11   5 1369.12 484.238   2
   2  11  -5 171.244 378.903   1
   2  11  -5 610.762 346.953   2
  -2  11   5 113.953 526.141   1
   2  11  -4 8267.16 988.111   2
   2  11  -4 7673.24 915.229   1
  -2  11   4 7853.87 1105.15   2
  -2  11   4 8099.00 1180.55   1
  -2 -11   4 8136.60 956.449   2
  -2 -11   3 4913.21 776.523   2
   2  11  -3 5054.50 799.209   2
  -2  11   3 5414.01 939.939   1
  -2  11   3 4820.42 792.207   2
   2  11  -2 7336.67 959.231   2
  -2  11   2 6843.24 889.370   2
  -2 -11   2 6322.87 869.093   2
   2  11  -1 4900.33 868.478   2
  -2 -11   1 4607.36 759.217   2
  -2  11   1 4268.16 658.476   2
   2  11   0-24.8487 456.689   2
  -2  11   0 88.0435 248.113   2
   2  11   0 448.949 337.075   1
  -2 -11   0 435.650 300.226   2
   2  11   1 1692.80 594.940   2
   2  11   1 2179.73 480.024   1
  -2  11  -1 1877.29 382.943   2
   2  11   2 30238.3 2253.31   2
  -2  11  -2 32161.0 1318.78   2
   2  11   2 31999.6 1810.83   1
   2  11   3 22947.6 2027.18   2
   2  11   3 21256.3 1510.97   1
   2  11   4 102251. 4017.95   1
   2  11   4 98358.3 4776.34   2
   2  11   5 3788.59 939.900   2
   2  11   5 2452.13 621.887   1
   2  11   6 19666.0 2130.99   2
   2  11   6 21454.4 1765.27   1
   2  11   7 4818.14 1226.23   2
   2  11   7 6558.68 1040.53   1
   2  11   8 3578.82 879.518   1
   2  11   8 5516.40 1323.34   2
   2  11   9 1568.67 623.556   1
   2  11   9 1057.47 722.355   2
   2  11  10 9242.43 1417.31   1
   2  11  10 11782.5 1837.37   2
   2  11  11 794.204 855.732   2
   2  11  11 152.563 697.929   1
   2  11  12 8751.27 1588.52   1
   2  11  12 13467.7 2161.03   2
  -2  12  13 3177.40 1166.04   1
  -2  12  12 24947.4 2669.43   1
  -2  12  11 3029.26 1013.60   1
  -2  12  10 4235.29 1164.11   1
  -2  12   9 12647.3 1729.26   1
  -2 -12   8 4455.71 793.770   2
  -2  12   8 5283.56 1192.96   1
  -2 -12   7 21502.1 1633.60   2
  -2  12   7 20906.5 2151.19   2
  -2  12   7 20336.4 2060.68   1
   2  12  -7 19789.5 1772.38   1
  -2 -12   6 21201.5 1614.92   2
  -2  12   6 21320.4 1993.98   1
   2  12  -6 21604.9 1623.94   2
  -2  12   6 21524.6 2065.21   2
   2  12  -6 19787.8 1688.91   1
   2  12  -5 34093.6 2100.94   2
  -2  12   5 37977.9 2628.07   2
  -2 -12   5 32892.1 2055.88   2
   2  12  -5 32237.0 2104.41   1
  -2  12   5 31061.1 2383.81   1
  -2 -12   4 28895.0 1913.68   2
   2  12  -4 27358.2 1903.38   2
  -2  12   4 28279.6 2226.98   1
   2  12  -4 28208.0 1855.85   1
  -2  12   4 31461.4 2240.00   2
  -2  12   3 745.636 410.424   2
  -2  12   3 1007.52 581.000   1
   2  12  -3 805.123 429.373   2
  -2 -12   3 940.659 413.932   2
   2  12  -2 106535. 4426.08   2
  -2  12   2 115224. 4331.48   2
  -2 -12   2 104310. 4358.60   2
   2  12  -1 9404.09 1182.12   2
  -2 -12   1 9249.23 1146.50   2
  -2  12   1 9125.96 987.496   2
   2  12   0 122371. 5102.97   2
  -2  12   0 131840. 4371.33   2
   2  12   0 127386. 4444.66   1
   2  12   1 10993.4 1053.99   1
   2  12   1 9317.84 1285.69   2
  -2  12  -1 10803.2 884.169   2
  -2  12  -2 73133.0 2470.80   2
   2  12   2 70760.8 3800.34   2
   2  12   2 73270.1 3136.67   1
   2  12   3 2281.64 529.840   1
   2  12   3 3654.43 937.441   2
   2  12   4 26947.2 2386.27   2
   2  12   4 26379.3 1837.09   1
   2  12   5-59.5567 380.020   1
   2  12   5 185.269 615.053   2
   2  12   6 2572.51 687.416   1
   2  12   6 2663.26 926.344   2
   2  12   7 496.129 444.355   1
   2  12   7-188.551 640.844   2
   2  12   8 772.353 525.955   1
   2  12   8-1278.72 825.885   2
   2  12   9-39.7653 461.539   1
   2  12   9 737.287 674.896   2
   2  12  10 3138.98 915.683   1
   2  12  10 4301.53 1302.38   2
   2  12  11 13868.9 2177.67   2
   2  12  11 12788.2 1764.24   1
  -2  13  12 46217.2 3686.92   1
  -2  13  12 46394.8 3972.69   2
  -2  13  11 11027.4 1777.70   1
  -2  13  11 11460.5 1914.37   2
  -2  13  10 102644. 5520.05   1
  -2  13  10 115330. 6069.98   2
  -2  13   9 10515.3 1715.22   2
  -2  13   9 9170.40 1558.68   1
  -2  13   8 138084. 6147.12   1
  -2  13   8 129944. 6305.86   2
  -2 -13   7 35154.8 2165.01   2
   2  13  -7 32656.9 2352.76   1
  -2  13   7 30754.9 2692.00   2
  -2  13   7 30671.5 2588.00   1
   2  13  -6 64281.5 3335.71   1
  -2  13   6 64498.2 3834.17   2
   2  13  -6 63724.4 3088.28   2
  -2  13   6 64131.5 3735.83   1
  -2 -13   6 66546.3 3151.34   2
  -2  13   5 42785.2 2924.24   1
  -2  13   5 43958.3 2957.77   2
  -2 -13   5 47341.7 2577.01   2
   2  13  -5 44412.6 2519.34   2
   2  13  -5 47921.3 2676.68   1
   2  13  -4 2938.75 653.514   1
  -2  13   4 2743.48 808.907   1
  -2 -13   4 3463.89 704.781   2
  -2  13   4 4218.21 872.971   2
   2  13  -4 4343.21 838.166   2
   2  13  -3 9205.09 1125.31   2
  -2  13   3 8840.02 1253.31   1
  -2  13   3 7691.68 1063.98   2
  -2 -13   3 8661.78 1133.04   2
   2  13  -2 2563.37 742.813   2
  -2  13   2 1311.00 538.860   2
  -2 -13   2 2249.97 614.898   2
  -2  13   1 405.574 328.891   2
   2  13  -1 253.264 466.578   2
   2  13   0 698.672 435.395   1
   2  13   0 480.519 481.361   2
  -2  13   0 460.817 246.253   2
   2  13   1 269.618 560.630   2
  -2  13  -1 480.586 287.886   2
   2  13   1 72.3765 318.328   1
  -2  13  -2 46864.0 1872.48   2
   2  13   2 44983.4 3017.90   2
   2  13   2 45457.6 2417.44   1
   2  13   3 118.026 297.699   1
   2  13   3 156.694 626.018   2
   2  13   4 64917.7 3920.33   2
   2  13   4 62758.6 3115.10   1
   2  13   5 7410.13 1026.77   1
   2  13   5 7418.86 1389.51   2
   2  13   6 39280.8 2545.90   1
   2  13   6 36970.9 3097.89   2
   2  13   7 4617.90 903.142   1
   2  13   7 5885.78 1383.56   2
   2  13   8 34951.8 2625.78   1
   2  13   8 42774.4 3501.49   2
   2  13   9-656.204 622.955   1
   2  13   9 2846.92 1096.86   2
   2  13  10 39522.1 3037.82   1
   2  13  10 39686.7 3523.99   2
   2  13  11 21154.9 2288.19   1
   2  13  11 23394.0 2872.98   2
  -2  14  11 3380.08 1231.45   2
  -2  14  11 4896.12 1339.70   1
  -2  14  10 3876.54 1127.36   1
  -2  14  10 3146.85 1011.32   2
  -2  14   9 4722.45 1187.99   2
  -2  14   9 7204.82 1416.59   1
  -2  14   8 2687.83 873.661   1
  -2  14   8 2275.94 1062.80   2
  -2  14   7 29408.0 2589.38   1
  -2  14   7 29467.2 2705.46   2
   2  14  -6 70779.1 3555.79   1
   2  14  -6 61723.4 3086.25   2
  -2  14   6 65821.7 3944.38   2
  -2  14   6 56978.5 3640.60   1
  -2  14   5 2576.05 858.335   1
   2  14  -5 2188.56 622.268   1
   2  14  -5 3856.17 828.688   2
  -2  14   5 4380.62 1016.60   2
  -2 -14   5 3965.01 772.491   2
   2  14  -4 118950. 4853.11   2
  -2 -14   4 130944. 4998.26   2
   2  14  -4 118992. 4773.97   1
  -2  14   4 121114. 5264.92   2
  -2  14   4 121276. 5433.41   1
  -2  14   3 18504.1 1724.83   2
   2  14  -3 18362.7 1674.52   2
  -2 -14   3 20286.6 1752.43   2
  -2  14   3 18026.1 1860.24   1
   2  14  -2 99324.2 4444.06   2
  -2  14   2 100532. 4273.37   2
  -2  14   1 34017.3 2086.89   2
   2  14  -1 33117.2 2019.88   1
   2  14  -1 29138.1 2267.06   2
  -2  14   0 54465.7 2579.82   2
   2  14   0 55301.1 2714.41   1
   2  14   0 51704.4 3168.86   2
   2  14   1 7703.87 961.192   1
  -2  14  -1 8664.36 867.959   2
   2  14   1 7663.99 1252.66   2
  -2  14  -2 21400.9 1195.41   2
   2  14   2 22032.4 1647.36   1
   2  14   2 19916.3 2022.37   2
  -2  14  -3 21906.5 976.708   2
   2  14   3 23996.9 2302.67   2
   2  14   3 24616.1 1796.69   1
   2  14   4 21847.3 1769.60   1
   2  14   4 25733.6 2457.81   2
   2  14   5 41784.5 2590.84   1
   2  14   5 44662.6 3377.46   2
   2  14   6 1664.89 811.607   2
   2  14   6 1474.01 555.163   1
   2  14   7 1879.09 620.720   1
   2  14   7-5.18821 531.466   2
   2  14   8 6098.06 1421.07   2
   2  14   8 4118.49 928.104   1
   2  14   9 30249.7 3121.65   2
   2  14   9 25374.7 2337.69   1
   2  14  10 15071.6 1874.57   1
   2  14  10 18141.3 2479.00   2
  -2  15  10-726.699 691.362   1
  -2  15  10 145.299 586.450   2
  -2  15   9 3378.49 1036.80   1
  -2  15   9 3207.37 1140.74   2
  -2  15   8 341.545 547.057   1
  -2  15   8 1043.79 895.093   2
  -2  15   7 28197.6 2681.03   2
  -2  15   7 27259.7 2533.82   1
   2  15  -6 2132.07 629.707   2
  -2  15   6 2822.30 863.046   2
  -2  15   6 3561.97 978.294   1
  -2  15   5 77240.2 4286.57   1
   2  15  -5 77020.7 3628.12   2
  -2  15   5 69482.1 4038.98   2
  -2  15   4 12981.5 1647.73   1
  -2  15   4 12269.4 1536.17   2
   2  15  -4 14763.6 1506.02   2
  -2  15   3 11809.7 1575.51   1
  -2  15   3 10756.2 1358.95   2
   2  15  -3 12059.3 1422.03   2
  -2  15   2 6275.34 1200.17   1
   2  15  -2 9051.98 1265.78   2
  -2  15   2 8273.13 1161.63   2
   2  15  -1-44.7764 475.686   2
   2  15  -1-138.439 294.917   1
  -2  15   1 78.9168 296.640   2
  -2  15   0 519.446 290.066   2
   2  15   0 20.0478 321.760   1
   2  15   1 2744.46 846.902   2
  -2  15  -1 3738.80 617.314   2
   2  15   1 2690.92 627.361   1
  -2  15  -2 26959.5 1402.56   2
   2  15   2 23122.2 2253.82   2
   2  15   2 24374.6 1824.36   1
   2  15   3 21906.7 2255.30   2
   2  15   3 20521.9 1697.40   1
   2  15   4 56518.7 3855.39   2
   2  15   4 58965.3 3121.64   1
   2  15   5 48260.1 3622.90   2
   2  15   5 44494.9 2747.76   1
   2  15   6 92208.7 4340.64   1
   2  15   6 91880.8 5387.88   2
   2  15   7 84722.9 4292.15   1
   2  15   7 92564.6 5547.52   2
   2  15   8 98600.8 5944.36   2
   2  15   8 101688. 4940.08   1
   2  15   9 35244.9 3491.05   2
   2  15   9 32180.7 2687.36   1
  -2  16   9-1119.50 789.107   1
  -2  16   9 749.028 741.150   2
  -2  16   8 1260.43 837.930   2
  -2  16   8-782.523 617.201   1
  -2  16   7 1469.10 758.926   2
  -2  16   7 838.732 500.511   1
  -2  16   6 7111.91 1353.84   1
  -2  16   6 6942.79 1345.80   2
   2  16  -6 6897.00 990.308   2
   2  16  -5 35735.2 2390.49   2
  -2  16   5 35232.4 2879.47   1
  -2  16   5 37570.6 2879.65   2
  -2  16   4 27928.0 2365.94   2
   2  16  -4 29719.0 2214.04   2
  -2  16   4 22437.8 2270.51   1
  -2  16   3 124086. 5359.47   2
   2  16  -3 129339. 5316.62   2
  -2  16   3 118246. 5652.26   1
   2  16  -2 55313.9 3281.52   2
  -2  16   2 49759.2 3364.05   1
  -2  16   2 53357.1 3046.85   2
   2  16  -1 145199. 5390.72   1
   2  16  -1 149391. 6090.30   2
  -2  16   1 137806. 5337.38   2
  -2  16   0 33609.8 2030.83   2
   2  16   0 31250.7 2524.46   2
   2  16   0 26887.7 1979.03   1
   2  16   1 44830.7 3203.82   2
   2  16   1 50159.8 2719.04   1
   2  16   2 17135.6 1961.05   2
   2  16   2 13855.4 1410.23   1
   2  16   3 33568.6 2909.98   2
   2  16   3 34566.5 2289.68   1
   2  16   4 2554.86 1016.97   2
   2  16   4 3996.65 806.515   1
   2  16   5 13566.8 1499.44   1
   2  16   5 12530.6 1921.31   2
   2  16   6-881.779 735.854   2
   2  16   6-330.170 449.766   1
   2  16   7 2783.93 985.479   2
  -2  17   7 8775.44 1622.56   1
  -2  17   7 5710.71 1338.02   2
  -2  17   6 8031.14 1497.34   1
  -2  17   6 8997.36 1550.72   2
  -2  17   5 31013.6 2735.03   1
  -2  17   5 31443.4 2706.88   2
  -2  17   4 8029.82 1336.57   2
   2  17  -4 7346.31 1123.36   2
  -2  17   4 6952.15 1343.97   1
   2  17  -3 12786.8 1552.97   2
  -2  17   3 11694.0 1709.05   1
  -2  17   3 9595.47 1396.84   2
  -2  17   2 2470.29 752.288   2
   2  17  -2 4324.46 967.867   2
   2  17  -2 3484.40 751.739   1
  -2  17   2 2996.13 948.429   1
  -2  17   1 399.149 453.874   2
   2  17  -1 683.776 487.483   1
   2  17   0 833.653 613.230   2
   2  17   0 788.398 449.565   1
   2  17   1 10497.5 1216.36   1
   2  17   1 11966.3 1676.02   2
   2  17   2 31.0147 605.602   2
   2  17   3 37101.0 3112.52   2
   2  17   4 1977.95 855.277   2
   2  17   5 104609. 5920.87   2
   2  17   6 5450.52 1456.92   2
  -2  18   5 29300.9 2638.20   2
  -2  18   5 26238.7 2637.12   1
  -2  18   4 1044.41 912.030   1
  -2  18   4 2034.58 823.755   2
   2  18  -3 83303.3 4198.65   2
  -2  18   3 72373.9 4447.97   1
  -2  18   3 82389.4 4265.31   2
   2  18  -2 542.349 599.228   2
  -2  18   2-254.234 703.137   1
  -2  18   1 65231.3 4136.98   1
   2  18  -1 71784.2 4071.94   2
   2  18   0 1111.38 653.554   2
   2  18   1 28757.0 2634.55   2
   2  18   2-2261.02 971.157   2
   2  18   3 12953.0 1962.44   2
  -3   0  17 75064.0 5068.45   1
  -3   0  16-108.340 856.542   1
  -3   0  15 33240.8 3058.49   1
  -3   0  14-112.101 699.398   1
  -3   0  13 112605. 5492.89   1
  -3   0  12 640.696 685.033   1
  -3   0  11 19006.8 1928.11   1
   3   0 -10 1486.86 630.345   1
  -3   0  10 619.436 660.009   1
   3   0  -9 56377.9 2990.92   1
  -3   0   9 57282.0 3087.79   1
   3   0  -8 2735.12 704.559   1
   3   0  -7 47733.5 2429.60   1
   3   0  -6 483.348 322.592   1
   3   0  -5 13905.2 1051.21   1
   3   0  -4 957.944 318.675   1
  -3   0   3 51851.6 2140.29   2
  -3   0   3 57557.9 2088.71   1
  -3   0   2 211.461 220.579   2
  -3   0   1 44993.2 1787.02   2
  -3   0   0 354.517 206.514   2
  -3   0  -1 374366. 9793.04   2
   3   0   1 376839. 9840.26   2
  -3   0  -2 31.5237 203.351   2
   3   0   2 86.4747 242.533   2
  -3   0  -3 11241.3 982.629   1
   3   0   3 10639.0 877.062   2
  -3   0  -4-76.6006 314.980   1
   3   0   4-62.4787 335.338   2
  -3   0  -5 13824.1 1293.15   1
   3   0   5 15029.3 1174.06   2
   3   0   6 203.398 384.661   2
  -3   0  -6 185.574 473.798   1
   3   0   7 2140.26 558.738   2
  -3   0  -7 2173.24 646.024   1
  -3   0  -8-235.171 521.057   1
   3   0   8 1216.08 611.676   2
   3   0   9 18434.3 1655.32   2
   3   0  10 672.779 614.950   2
   3   0  11 33472.0 2490.90   2
   3   0  12-202.795 353.880   2
   3   0  13 192064. 7557.74   2
   3   0  14 1010.63 768.768   2
   3   0  15 150677. 6806.07   2
  -3   1  17 7257.80 1609.96   1
  -3  -1  17 6317.26 1558.78   1
  -3  -1  16 1730.27 861.576   1
  -3   1  16 4106.20 1179.68   1
  -3   1  15 40344.9 3333.99   1
  -3  -1  15 36229.5 3209.44   1
  -3  -1  14 2561.17 911.267   1
  -3   1  14 2851.74 949.717   1
  -3   1  13 77250.9 4436.54   1
  -3  -1  13 79589.3 4493.61   1
  -3  -1  12-120.322 688.494   1
  -3   1  12 648.899 704.485   1
  -3  -1  11 201248. 7410.84   1
  -3   1  11 191301. 7293.87   1
  -3  -1  10 17054.5 1715.05   1
   3  -1 -10 19004.1 1767.52   1
  -3   1  10 16028.1 1690.76   1
   3   1 -10 19696.0 1773.26   1
   3  -1  -9 547537. 15435.9   1
  -3  -1   9 513653. 15326.1   1
   3   1  -8 77622.3 3399.22   1
  -3  -1   8 74918.5 3423.87   1
   3  -1  -8 70739.3 3356.27   1
   3   1  -7 364472. 10055.3   1
   3  -1  -7 366260. 10185.0   1
   3  -1  -6 274466. 7482.44   1
  -3  -1   6 248445. 7275.57   1
   3   1  -5 1656.13 396.803   1
   3  -1  -5 1380.81 390.396   1
  -3  -1   5 1742.80 402.679   1
  -3  -1   4 38289.1 1704.50   1
   3  -1  -4 38255.1 1802.54   1
   3   1  -4 40879.5 1708.54   1
  -3  -1   4 41404.9 1893.40   2
   3   1  -3 5133.93 483.448   1
  -3  -1   3 5926.07 632.490   2
  -3  -1   3 5851.07 527.645   1
  -3  -1   2 490.143 270.705   2
  -3  -1   2 229.270 160.828   1
  -3   1   2 459.556 249.680   2
  -3  -1   1 2497.36 424.500   2
  -3   1   1 1837.13 325.801   2
   3  -1   0 15492.5 873.345   2
  -3   1   0 15634.9 868.126   2
  -3  -1   0 15633.0 991.944   2
   3  -1   1 7196.11 602.825   2
  -3  -1  -1 7061.63 668.680   2
  -3   1  -1 7216.84 590.842   2
  -3  -1  -2 14853.6 1020.24   1
  -3   1  -2 16874.5 957.887   2
  -3  -1  -2 14521.8 1027.65   2
   3   1   2 15148.0 1064.88   2
   3  -1   2 17979.9 989.970   2
  -3   1  -3 67519.8 2834.94   1
   3  -1   3 76429.1 2562.16   2
   3   1   3 59179.1 2586.64   2
  -3  -1  -3 67715.2 2690.78   2
  -3  -1  -3 67523.4 2731.96   1
  -3  -1  -4 228.272 284.759   1
   3   1   4 396.613 382.772   2
   3  -1   4 775.456 323.235   2
  -3   1  -4 386.779 300.294   1
  -3  -1  -5 286192. 8776.56   1
   3   1   5 310917. 8639.75   2
   3  -1   5 291548. 8224.72   2
  -3   1  -5 280246. 8851.71   1
  -3  -1  -6 22536.0 1738.83   1
   3  -1   6 21157.6 1422.06   2
   3   1   6 18905.3 1597.57   1
  -3   1  -6 21205.6 1721.14   1
   3   1   6 20267.2 1550.68   2
   3   1   7 151496. 5730.00   1
  -3   1  -7 167160. 6018.07   1
   3   1   7 151643. 5439.70   2
  -3  -1  -7 157324. 5856.32   1
   3  -1   7 138022. 5060.85   2
   3   1   8 19725.2 1847.77   1
  -3  -1  -8 23568.0 1999.50   1
   3  -1   8 22410.0 1664.59   2
   3   1   8 20192.1 1721.89   2
   3   1   9 94323.4 4578.23   1
   3   1   9 96721.4 4330.04   2
   3  -1   9 94253.2 4059.17   2
   3   1  10 885.265 596.014   2
   3   1  10 517.055 727.462   1
   3  -1  10 1382.14 672.770   2
   3   1  11 41028.2 2848.94   2
   3  -1  11 41420.0 2706.76   2
   3   1  11 40070.1 3090.20   1
   3   1  12 6697.63 1231.49   2
   3  -1  12 9886.78 1350.42   2
   3  -1  13 6408.34 1196.42   2
   3   1  13 4376.78 1138.19   2
   3   1  14 1616.38 852.890   2
   3  -1  14 1206.82 749.066   2
   3  -1  15 2476.55 911.185   2
   3   1  15 2155.26 1009.60   2
  -3  -2  17 62410.2 4612.14   1
  -3   2  17 60279.7 4496.37   1
  -3   2  16 8562.86 1726.25   1
  -3  -2  16 10051.8 1826.89   1
  -3  -2  15 40324.6 3378.14   1
  -3   2  15 38326.1 3297.98   1
  -3   2  14 15523.2 2037.62   1
  -3  -2  14 15945.3 2057.57   1
  -3   2  13 19171.1 2145.38   1
  -3  -2  13 18519.3 2098.24   1
  -3   2  12 12749.5 1693.80   1
  -3  -2  12 16300.5 1866.08   1
  -3   2  11 1809.28 758.709   1
  -3  -2  11 4202.01 986.508   1
  -3   2  10 4574.25 1018.73   1
   3  -2 -10 3225.27 783.764   1
   3   2 -10 4146.48 853.031   1
  -3  -2  10 5090.56 1015.89   1
   3   2  -9 55247.8 2945.96   1
  -3  -2   9 57611.1 3068.13   1
   3  -2  -9 59777.6 3130.51   1
  -3  -2   8 26299.3 1883.83   1
   3   2  -8 26439.5 1828.21   1
   3  -2  -8 27750.9 1945.36   1
   3   2  -7 62605.5 2836.43   1
   3  -2  -7 62809.3 2955.28   1
  -3  -2   7 67357.6 2976.69   1
  -3  -2   6 200420. 6081.00   1
   3  -2  -6 209522. 6287.02   1
  -3  -2   6 198731. 6132.68   2
   3   2  -5 107468. 3484.44   1
  -3  -2   5 105619. 3690.24   2
   3  -2  -5 100101. 3681.00   1
   3   2  -4 5223.39 541.887   1
  -3  -2   4 6764.11 739.160   2
  -3  -2   4 6402.46 613.500   1
  -3  -2   3 31429.0 1277.39   1
  -3  -2   3 31488.6 1590.97   2
   3   2  -3 30147.2 1239.11   1
  -3  -2   2 144365. 4463.67   2
  -3   2   2 135851. 4201.99   2
  -3  -2   2 147578. 3844.18   1
  -3  -2   1 85118.8 2980.30   2
  -3   2   1 83327.5 2675.88   2
   3  -2   0 59329.0 1984.67   2
  -3   2   0 58137.7 1954.99   2
  -3  -2   0 56863.7 2312.84   2
  -3   2  -1 419003. 10735.3   2
   3  -2   1 434525. 10765.9   2
  -3  -2  -1 420101. 11311.3   2
  -3  -2  -1 435831. 10870.1   1
  -3  -2  -2 690.739 306.767   2
  -3  -2  -2 950.638 313.225   1
  -3   2  -2 738.879 228.125   2
   3  -2   2 711.895 229.314   2
  -3  -2  -3 190883. 5744.13   1
  -3  -2  -3 192671. 5885.04   2
   3  -2   3 186025. 5261.37   2
  -3  -2  -4 29271.4 1732.55   1
   3   2   4 24291.7 1629.35   2
   3  -2   4 29383.5 1408.90   2
   3   2   4 26985.1 1642.18   1
  -3   2  -4 26901.8 1773.87   1
   3  -2   5 3774.50 552.063   2
  -3  -2  -5 4052.45 727.729   1
   3   2   5 4189.22 765.485   2
  -3   2  -5 3204.82 668.219   1
   3   2   5 3672.31 696.085   1
  -3  -2  -6 12014.2 1252.68   1
   3   2   6 8829.57 1072.74   1
   3  -2   6 8747.05 867.744   2
   3   2   6 8822.91 1082.68   2
  -3   2  -6 10458.6 1199.77   1
   3  -2   7 19967.3 1405.52   2
   3   2   7 19343.9 1696.67   1
  -3   2  -7 23577.9 1942.26   1
  -3  -2  -7 18935.2 1711.69   1
   3   2   7 20694.4 1687.93   2
  -3  -2  -8 8579.07 1269.83   1
   3   2   8 8480.17 1176.62   2
   3   2   8 7723.37 1179.58   1
   3  -2   8 11434.9 1107.70   2
   3  -2   9 14782.5 1374.26   2
   3   2   9 16384.6 1647.35   2
   3   2  10 28147.5 2455.38   1
   3   2  10 29707.6 2367.71   2
   3  -2  10 33094.0 2174.27   2
   3  -2  11 21120.5 1840.92   2
   3   2  11 25450.0 2261.14   2
   3   2  11 23433.3 2368.77   1
   3   2  12 41047.7 3304.31   1
   3   2  12 46193.5 3196.83   2
   3  -2  12 40714.1 2747.04   2
   3   2  13 70373.7 4538.79   1
   3  -2  13 73915.8 3928.53   2
   3   2  13 71940.0 4305.90   2
   3   2  14 34147.0 3000.11   2
   3  -2  14 28984.9 2437.59   2
   3  -2  15 62292.5 3785.87   2
   3   2  15 52386.9 3912.34   2
  -3   3  17 1489.90 857.172   1
  -3  -3  17-17.9968 1114.04   1
  -3  -3  16 304.208 700.418   1
  -3   3  16-585.158 817.251   1
  -3  -3  15 2206.32 985.322   1
  -3   3  15 1496.10 917.179   1
  -3   3  14 43236.3 3382.37   1
  -3  -3  14 45627.9 3501.23   1
  -3  -3  13 29060.3 2587.24   1
  -3   3  13 30515.4 2689.49   1
  -3   3  12 91277.2 4642.92   1
  -3  -3  12 75792.8 4279.05   1
  -3  -3  11 32902.4 2509.60   1
  -3   3  11 28063.7 2373.38   1
   3   3 -10 103360. 4471.13   1
  -3  -3  10 96209.2 4521.81   1
  -3   3  10 103154. 4657.09   1
  -3  -3   9 90186.1 4099.13   1
   3  -3  -9 102162. 4328.81   1
   3   3  -9 91692.5 4037.93   1
   3   3  -8 216763. 6859.20   1
  -3  -3   8 204965. 6918.36   1
   3  -3  -8 206085. 7022.72   1
  -3  -3   8 210014. 6846.21   2
   3   3  -7 20076.6 1452.73   1
  -3  -3   7 17086.0 1367.11   2
   3  -3  -7 20458.0 1584.89   1
  -3  -3   7 22623.8 1602.73   1
   3   3  -6 196839. 5887.03   1
  -3  -3   6 201316. 6121.59   2
  -3  -3   6 204322. 6047.21   1
   3  -3  -5 95751.5 3616.92   1
  -3  -3   5 95156.8 3323.09   1
  -3  -3   5 93498.1 3514.56   2
   3   3  -5 94253.9 3238.30   1
  -3  -3   4 277730. 7576.27   1
   3   3  -4 290837. 7535.27   1
  -3  -3   4 275819. 7998.26   2
  -3  -3   3 579.153 333.818   2
  -3  -3   3 523.725 197.752   1
   3   3  -3 562.820 202.258   1
  -3  -3   2 40605.8 1876.53   2
  -3  -3   2 38780.3 1218.32   1
  -3  -3   1 32187.4 1639.39   2
  -3   3   1 30378.4 1297.23   2
  -3  -3   0 502418. 12193.1   1
  -3   3   0 490800. 12421.0   2
  -3  -3   0 530624. 13250.9   2
  -3  -3  -1 19649.2 963.269   1
  -3   3  -1 20861.5 893.503   2
   3  -3   1 21975.3 917.862   2
   3   3   2 414787. 10667.8   1
  -3   3  -2 424996. 10281.8   2
  -3  -3  -2 418412. 10711.8   1
   3  -3   2 413784. 10267.4   2
   3  -3   3 27616.4 1154.97   2
  -3  -3  -3 26285.5 1649.75   2
   3   3   3 25229.4 1421.68   1
  -3  -3  -3 28320.8 1516.81   1
   3   3   4 132393. 4562.32   1
   3  -3   4 139164. 4009.16   2
  -3   3  -4 144481. 5051.62   1
  -3  -3  -4 129331. 4579.62   1
   3   3   5 125533. 4655.44   2
   3   3   5 124048. 4519.77   1
   3  -3   5 118844. 3805.82   2
  -3   3  -5 123466. 4808.38   1
  -3  -3  -5 125679. 4559.32   1
   3   3   6 87869.3 3761.59   1
   3   3   6 82626.2 3737.52   2
   3  -3   6 87169.3 3120.46   2
  -3  -3  -6 90153.5 3835.05   1
  -3   3  -6 87813.1 4008.47   1
   3   3   7 55366.4 3065.47   1
   3  -3   7 59236.6 2536.56   2
  -3   3  -7 59762.9 3295.91   1
  -3  -3  -7 59083.4 3159.43   1
   3   3   7 63251.4 3224.74   2
   3   3   8 62059.6 3377.55   2
   3   3   8 62061.8 3397.38   1
  -3  -3  -8 60063.8 3387.33   1
   3  -3   8 69066.2 2898.72   2
   3   3   9 51818.3 3265.92   1
   3   3   9 57524.5 3332.38   2
   3  -3   9 59586.8 2803.52   2
   3  -3  10 20307.1 1629.96   2
   3   3  10 21551.7 2098.38   2
   3   3  10 20217.0 2093.85   1
   3  -3  11 57505.3 3032.19   2
   3   3  11 52298.7 3557.64   1
   3   3  11 54488.5 3516.09   2
   3   3  12 5467.89 1237.32   2
   3  -3  12 5954.50 999.084   2
   3   3  12 2988.33 956.409   1
   3   3  13 12412.0 1899.44   1
   3  -3  13 12160.4 1472.85   2
   3   3  13 13283.4 1864.44   2
   3   3  14 1004.79 872.759   1
   3  -3  14 2771.87 801.504   2
   3   3  14 2497.80 1062.71   2
  -3   4  17 16288.2 2307.47   1
  -3  -4  17 12786.4 2102.47   1
  -3   4  16 32705.4 3165.23   1
  -3  -4  16 33448.0 3258.61   1
  -3  -4  15 15899.5 2136.90   1
  -3   4  15 14401.4 2057.60   1
  -3   4  14 33158.1 3001.96   1
  -3  -4  14 37720.2 3140.49   1
  -3  -4  13 4362.32 1184.99   1
  -3   4  13 2545.79 1024.14   1
  -3   4  12 12323.0 1680.18   1
  -3  -4  12 9440.01 1480.29   1
  -3   4  11 9228.77 1393.90   1
  -3  -4  11 8607.24 1299.82   1
  -3  -4  10 918.696 515.805   1
  -3  -4  10 227.016 332.521   2
   3   4 -10 832.141 408.683   1
  -3   4  10-211.457 591.150   1
  -3  -4   9 7692.04 1024.59   2
  -3  -4   9 7181.47 1036.39   1
   3  -4  -9 5645.66 941.517   1
   3   4  -9 7353.64 985.282   1
  -3  -4   8 3100.76 754.832   1
  -3  -4   8 3451.44 700.973   2
   3   4  -8 2566.56 604.814   1
   3  -4  -8 3085.74 708.660   1
   3   4  -7 134438. 4692.20   1
  -3  -4   7 130949. 4745.31   2
   3  -4  -7 141502. 5070.28   1
  -3  -4   7 124885. 4696.07   1
  -3  -4   6 18798.8 1397.20   2
   3   4  -6 19100.3 1303.14   1
  -3  -4   6 19482.1 1367.79   1
   3  -4  -6 20118.0 1522.51   1
  -3  -4   5 563960. 14395.7   1
  -3  -4   5 559599. 14706.3   2
   3   4  -5 544379. 14237.3   1
  -3  -4   4 547830. 14098.2   2
   3   4  -4 531438. 13435.5   1
  -3  -4   4 527377. 13528.9   1
  -3  -4   3 412940. 10953.8   2
  -3  -4   3 405197. 10136.8   1
   3   4  -3 399723. 10066.0   1
  -3  -4   2 822735. 20813.9   2
  -3  -4   1 309487. 8666.01   2
  -3   4   0 554168. 13577.2   2
  -3  -4   0 550442. 14508.0   2
  -3  -4  -1 281073. 7894.01   2
   3   4   1 274724. 6912.56   1
  -3  -4  -1 270402. 6918.90   1
  -3   4  -1 261213. 6711.42   2
  -3  -4  -2 103622. 3179.02   1
   3   4   2 100291. 3169.83   1
  -3  -4  -2 98930.3 3740.45   2
   3  -4   2 96815.1 2668.82   2
   3   4   3 70825.2 2694.66   1
   3  -4   3 70792.7 2114.60   2
  -3  -4  -3 73420.1 2731.79   1
  -3  -4  -3 79156.8 3229.37   2
   3   4   4 7495.76 832.143   1
  -3  -4  -4 7205.08 815.171   1
  -3   4  -5 8295.83 1072.90   1
  -3  -4  -5 8765.42 980.801   1
   3   4   5 7513.46 916.799   1
   3  -4   5 7150.62 602.278   2
  -3   4  -6 7039.69 1084.20   1
   3   4   6 6508.50 923.606   1
   3   4   6 7655.79 1085.38   2
  -3  -4  -6 8345.56 1042.61   1
   3  -4   6 8037.59 690.403   2
   3   4   7 2777.32 739.601   2
   3   4   7 1847.68 647.233   1
  -3  -4  -7 2375.87 724.316   1
   3  -4   7 2384.85 465.820   2
   3   4   8 23627.3 1990.38   1
  -3  -4  -8 27709.4 2141.40   1
   3   4   8 24959.5 2114.88   2
   3  -4   8 24511.1 1514.65   2
   3  -4   9 1613.31 512.449   2
   3   4   9 396.033 653.914   1
   3   4   9 665.394 614.354   2
   3  -4  10 45927.0 2462.62   2
   3   4  10 44523.1 3101.34   1
   3   4  10 49276.9 3252.91   2
   3  -4  11 952.390 481.140   2
   3   4  11 125.255 594.268   2
   3   4  12 36314.1 3029.37   1
   3   4  12 38647.0 3096.90   2
   3  -4  12 40160.1 2487.54   2
   3   4  13 1529.02 816.360   1
   3  -4  13 740.824 469.741   2
   3   4  13 1207.70 715.685   2
   3   4  14 16947.4 2262.45   1
   3   4  14 16310.1 2176.55   2
  -3   5  17 697.058 908.054   1
  -3  -5  17-91.8780 635.841   1
  -3  -5  16 512.401 754.045   1
  -3   5  16-118.717 832.688   1
  -3  -5  15 669.752 788.637   1
  -3   5  15 135.394 801.156   1
  -3   5  14 7123.96 1507.71   1
  -3  -5  14 8522.07 1548.47   1
  -3   5  13 191.540 665.185   1
  -3  -5  13 1054.52 775.566   1
  -3   5  12 13546.4 1737.08   1
  -3  -5  12 13003.4 1740.57   1
  -3  -5  11 662.770 433.139   2
  -3  -5  11 417.563 583.426   1
  -3   5  11 1408.27 656.166   1
  -3  -5  10 1672.63 692.518   1
   3   5 -10 439.661 410.837   1
  -3  -5  10 1639.79 529.468   2
  -3   5  10 720.249 612.169   1
  -3  -5   9 655.009 506.966   1
  -3  -5   9 713.899 409.173   2
   3   5  -9-487.665 363.145   1
  -3   5   9 173.446 567.725   1
   3  -5  -9-87.8535 290.018   1
  -3  -5   8 106646. 4304.05   1
  -3  -5   8 102698. 4148.94   2
   3   5  -8 100961. 4104.60   1
   3  -5  -8 99920.8 4356.73   1
  -3  -5   7 5588.38 815.211   1
   3  -5  -7 3491.16 733.898   1
  -3  -5   7 3839.96 694.760   2
   3   5  -7 5087.75 742.607   1
  -3  -5   6 121655. 4372.80   2
  -3  -5   6 114651. 4202.45   1
   3   5  -6 126464. 4221.23   1
   3   5  -5 3922.88 696.139   2
  -3  -5   5 4668.98 699.203   2
   3   5  -5 6538.61 686.053   1
  -3  -5   5 4488.25 605.564   1
   3   5  -4 200720. 6229.47   2
   3   5  -4 201112. 5633.34   1
  -3  -5   4 206065. 6268.81   2
  -3  -5   3 23711.4 1497.05   2
   3   5  -3 24481.2 1030.80   1
   3   5  -3 23544.9 1511.47   2
  -3  -5   2 1601.69 457.666   2
  -3  -5   1 6531.05 815.799   2
  -3   5   0 119481. 3315.78   2
  -3  -5   0 118017. 4203.59   2
   3   5   1 107120. 3056.65   1
  -3  -5  -1 106389. 3042.13   1
  -3  -5  -1 105853. 3944.15   2
  -3  -5  -2 55085.4 2015.00   1
   3   5   2 53735.5 2015.50   1
  -3  -5  -2 52341.1 2572.85   2
   3   5   3 212.479 294.501   1
  -3  -5  -3-10.8173 203.737   1
   3  -5   4 73027.8 2115.99   2
  -3  -5  -4 78142.6 3054.84   1
  -3  -5  -5 22311.1 1573.11   1
  -3   5  -5 20290.1 1733.32   1
   3   5   5 23617.6 1597.93   1
   3  -5   5 22459.3 981.886   2
   3   5   6 161864. 6244.27   2
  -3  -5  -6 172950. 6012.32   1
   3  -5   6 172279. 4874.98   2
  -3   5  -6 173381. 6463.25   1
   3   5   6 183182. 6043.22   1
  -3  -5  -7 20975.3 1779.98   1
   3  -5   7 23047.7 1252.39   2
   3   5   7 27092.2 2141.26   2
   3   5   7 23208.2 1841.25   1
  -3  -5  -8 180295. 6726.38   1
   3  -5   8 183480. 5546.31   2
   3   5   8 193719. 7104.85   2
   3   5   8 174166. 6644.73   1
   3   5   9 7846.23 1259.89   1
   3  -5   9 9339.79 938.829   2
   3   5   9 8796.47 1402.93   2
   3   5  10 48695.1 3253.46   1
   3  -5  10 48590.9 2429.23   2
   3   5  10 48252.6 3323.65   2
   3  -5  11 6513.45 916.549   2
   3   5  11 9388.59 1489.12   1
   3   5  11 5973.65 1271.81   2
   3   5  12-179.188 563.112   1
   3  -5  12 1339.10 474.095   2
   3   5  12 629.862 741.478   2
   3   5  13 4838.06 1269.97   1
   3  -5  13 3657.06 795.908   2
   3   5  13 4300.87 1234.49   2
   3   5  14-831.826 705.181   1
   3   5  14 526.691 791.480   2
  -3   6  16 50726.1 4059.40   1
  -3   6  15 1749.56 799.448   1
  -3  -6  14 55647.6 3932.95   1
  -3   6  14 55469.9 3978.11   1
  -3  -6  13 3489.20 1062.36   1
  -3   6  13 2475.52 955.844   1
  -3  -6  12 16900.4 1935.21   1
  -3   6  12 16729.4 1986.34   1
  -3  -6  11 1523.18 589.558   2
  -3  -6  11 586.921 653.462   1
  -3   6  11 1882.37 801.210   1
  -3  -6  10 1054.11 504.726   2
  -3  -6  10 810.127 602.812   1
  -3   6  10 153.931 530.289   1
   3   6 -10 1367.79 522.848   1
  -3  -6   9 22692.1 1892.25   1
  -3   6   9 21703.0 1950.98   1
  -3  -6   9 25303.3 1848.63   2
   3   6  -9 22715.8 1815.50   1
   3   6  -8 3568.53 666.009   1
  -3  -6   8 1484.95 579.311   1
  -3   6   8 1214.45 555.870   1
  -3  -6   8 3048.13 649.115   2
   3  -6  -8 3555.44 786.121   1
  -3  -6   7 58768.7 2836.87   2
   3   6  -7 63242.3 2853.88   1
  -3  -6   6 60340.8 2804.52   2
   3   6  -6 64402.1 2698.22   1
  -3  -6   5 45194.6 2275.88   2
   3   6  -5 44433.4 2236.61   2
   3   6  -5 42533.3 1951.91   1
  -3  -6   4 738858. 19017.3   2
   3   6  -4 732995. 19001.0   2
   3   6  -4 730715. 18262.0   1
  -3  -6   3 1705.46 539.007   2
   3   6  -3 1351.65 268.518   1
   3   6  -2 991783. 25004.3   2
   3   6  -2 982945. 23649.2   1
  -3  -6   2 999999. 24991.7   2
  -3  -6   1 3506.46 678.052   2
   3   6   0 657723. 15944.7   1
  -3  -6   0 684733. 17462.6   2
  -3  -6  -1 7439.60 901.371   2
   3   6   1 7340.81 530.531   1
  -3  -6  -2 124596. 3779.07   1
  -3  -6  -2 125789. 4654.31   2
   3   6   2 124548. 3783.25   1
  -3  -6  -3 42709.8 1910.66   1
   3   6   3 42046.4 1892.95   1
   3   6   4 24489.6 1500.67   1
  -3  -6  -4 26072.4 1575.49   1
   3   6   5 144.809 319.711   1
  -3  -6  -5 1263.41 471.315   1
  -3  -6  -6 1296.66 475.018   1
   3   6   6 1224.77 517.071   1
   3   6   6 2416.41 679.244   2
   3   6   7 2311.11 826.409   2
  -3  -6  -7 1715.07 569.747   1
   3  -6   7 2394.26 354.469   2
   3   6   7 2150.51 625.252   1
  -3  -6  -8 10029.7 1294.16   1
   3   6   8 14259.2 1520.75   1
   3   6   8 14669.9 1701.13   2
   3  -6   8 10477.4 817.686   2
   3   6   9 7109.86 1202.17   1
   3   6   9 7993.26 1352.46   2
   3  -6   9 8507.57 820.195   2
   3   6  10 46041.5 3143.98   1
   3   6  10 51510.1 3516.45   2
   3  -6  10 48758.4 2304.34   2
   3  -6  11 5221.26 766.761   2
   3   6  11 6507.90 1330.20   2
   3   6  12 21198.5 2321.65   1
   3  -6  12 24645.0 1718.17   2
   3   6  12 23263.6 2499.28   2
   3   6  13-1836.96 949.883   1
   3   6  13-156.454 848.261   2
   3   6  14 4236.23 1297.76   1
   3   6  14 3921.55 1271.05   2
  -3   7  16 5887.39 1515.25   1
  -3   7  15 3344.78 1129.68   1
  -3   7  14 29077.7 2851.81   1
  -3   7  13 794.121 694.937   1
  -3   7  12 41495.5 3174.55   1
  -3   7  11 3159.26 932.237   1
  -3  -7  11 2809.06 774.305   2
  -3   7  10 49990.9 3238.15   1
  -3  -7  10 52253.1 2912.77   2
   3   7 -10 47785.0 2918.53   1
   3   7  -9 186.329 309.910   1
  -3  -7   9 486.291 387.959   2
  -3   7   9 956.733 628.700   1
  -3   7   8 79131.7 3881.44   1
   3   7  -8 72327.2 3397.56   1
  -3  -7   8 74636.8 3393.31   2
  -3  -7   7 1435.65 512.987   2
   3   7  -7 1479.08 517.754   1
  -3   7   7 1646.92 616.762   1
  -3  -7   6 202445. 6497.16   2
   3   7  -6 193734. 6201.41   1
  -3   7   6 203634. 6939.27   1
   3   7  -6 203698. 6479.03   2
  -3  -7   5 35759.2 2056.41   2
   3   7  -5 36937.5 2088.84   2
   3   7  -5 40556.3 1895.42   1
   3   7  -4 86167.6 2909.83   1
   3   7  -4 80771.5 3369.38   2
  -3  -7   4 83370.0 3433.77   2
   3   7  -3 7695.97 940.641   2
   3   7  -3 7479.84 601.825   1
  -3  -7   3 8449.23 945.710   2
   3   7  -2 3215.09 659.958   2
   3   7  -2 2518.07 302.565   1
  -3  -7   2 3203.34 592.095   2
   3   7  -1 12430.7 1181.22   2
   3   7  -1 11890.1 575.896   1
  -3  -7   1 10763.5 1098.89   2
   3   7   0 26595.8 1030.58   1
  -3  -7   0 29435.2 1842.83   2
  -3  -7  -1 58289.8 2891.18   2
   3   7   1 62474.5 2063.17   1
   3   7   2 103122. 3323.11   1
  -3  -7  -2 106821. 4276.08   2
   3   7   3 1753.34 407.825   1
  -3  -7  -3 2120.54 419.246   1
   3   7   4 137334. 4622.45   1
  -3  -7  -4 138467. 4647.35   1
  -3  -7  -5 5359.34 779.865   1
   3   7   5 6161.54 1107.21   2
   3   7   5 4872.57 741.514   1
   3   7   6 151008. 5450.37   1
   3   7   6 155111. 6154.35   2
  -3  -7  -6 152741. 5503.12   1
   3  -7   7 38822.7 1356.64   2
  -3  -7  -7 41466.8 2529.72   1
   3   7   7 41634.3 2883.54   2
   3   7   7 38004.2 2420.32   1
   3  -7   7 40531.0 1369.94   2
  -3  -7  -8 98132.7 4579.94   1
   3   7   8 98630.3 4550.78   1
   3   7   8 110164. 5185.71   2
   3  -7   8 109389. 3281.02   2
   3  -7   8 102374. 3177.57   2
   3   7   9 9544.87 1379.43   1
   3  -7   9 12585.8 872.079   2
   3   7   9 12446.6 1713.98   2
   3  -7  10 35865.4 1747.80   2
   3   7  10 31297.2 2572.20   1
   3   7  10 34601.3 2981.29   2
   3   7  11 11817.5 1672.07   1
   3   7  11 11158.5 1763.34   2
   3   7  12 13281.0 1963.36   2
   3   7  12 10746.8 1705.42   1
   3   7  13 10251.5 1812.34   2
   3   7  13 9355.95 1730.93   1
  -3   8  16 22893.9 2742.12   1
  -3   8  15 11794.4 1963.52   1
  -3   8  14 15565.8 2186.44   1
  -3   8  13 10581.7 1724.65   1
  -3   8  12 2521.98 936.048   1
  -3  -8  11 2513.44 688.754   2
  -3   8  11 2617.86 943.947   1
  -3  -8  10 2614.44 701.595   2
  -3   8  10 1137.58 651.202   1
  -3   8   9 23089.0 2108.37   1
  -3  -8   9 22760.6 1776.40   2
   3   8  -9 22641.5 1841.18   1
  -3   8   8 1938.10 711.903   1
  -3  -8   8 1258.47 547.108   2
   3   8  -8 1446.70 546.195   1
   3   8  -7 102703. 4053.17   1
  -3  -8   7 99949.7 4096.52   2
  -3   8   7 104905. 4587.45   1
  -3  -8   6 10940.5 1161.36   2
   3   8  -6 10997.6 1049.65   1
  -3   8   6 13558.9 1434.36   1
   3   8  -6 10971.8 1121.49   2
   3   8  -5 155331. 4843.09   1
   3   8  -5 145839. 5167.51   2
  -3   8   5 142179. 5515.74   1
  -3  -8   5 147043. 5209.03   2
   3   8  -4 115733. 4397.21   2
   3   8  -4 121248. 3893.46   1
  -3   8   4 128855. 4840.42   1
  -3  -8   4 114034. 4386.46   2
   3   8  -3 49200.3 2507.16   2
   3   8  -3 50429.4 1945.84   1
  -3  -8   3 49939.7 2530.65   2
   3   8  -2 301573. 8884.09   2
   3   8  -2 294817. 7691.03   1
  -3  -8   2 295376. 8855.39   2
   3   8  -1 10588.8 1157.18   2
   3   8  -1 12226.4 676.788   1
  -3  -8   1 11006.6 1132.17   2
   3   8   0 99211.1 4091.15   2
   3   8   0 100135. 2978.57   1
  -3   8   0 103087. 3090.66   2
  -3  -8   0 98660.6 4041.48   2
   3   8   1 74175.2 2441.49   1
  -3   8  -1 72291.2 2053.01   2
   3   8   1 77064.2 3485.51   2
  -3  -8  -1 73663.9 3387.89   2
   3   8   2 7515.04 684.835   1
  -3  -8  -2 5614.74 910.814   2
   3   8   2 7197.29 1084.36   2
   3   8   3 115679. 3920.77   1
   3   8   3 122254. 4962.11   2
  -3  -8  -4 5261.77 723.499   1
   3   8   4 4302.63 648.632   1
   3   8   4 6165.68 1061.42   2
   3   8   5 16412.8 1361.09   1
   3   8   5 21423.6 1978.91   2
  -3  -8  -5 19526.9 1478.66   1
  -3  -8  -6 8766.67 1084.80   1
   3   8   6 7570.85 1265.70   2
   3   8   6 7700.53 1024.35   1
   3   8   7-35.8016 412.814   1
   3   8   7-682.721 632.407   2
  -3  -8  -7 981.568 541.641   1
   3   8   8 17355.1 1984.40   2
   3   8   8 12446.4 1420.20   1
  -3  -8  -8 15255.5 1587.66   1
   3  -8   9 135.277 120.380   2
   3   8   9 69.2502 539.231   1
   3   8   9-223.742 762.700   2
   3   8  10 65193.0 4205.73   2
   3   8  10 66857.8 3877.68   1
   3   8  11 790.308 670.812   1
   3   8  11 738.501 761.484   2
   3   8  12 53880.2 3775.34   1
   3   8  12 62203.7 4336.92   2
   3   8  13 12175.4 2043.05   2
   3   8  13 9059.53 1685.22   1
  -3   9  15 16268.4 2344.66   1
  -3   9  14 19173.2 2430.43   1
  -3   9  13 10535.8 1765.20   1
  -3   9  12 74782.7 4519.77   1
  -3  -9  11 52400.5 3033.70   2
  -3   9  11 49871.2 3497.50   1
  -3  -9  10 135710. 5286.79   2
  -3   9  10 127286. 5899.72   1
  -3  -9   9 95917.1 4171.71   2
   3   9  -9 101393. 4396.77   1
  -3   9   9 94651.2 4756.44   1
   3   9  -8 100161. 4320.11   1
  -3   9   8 111680. 5009.26   1
  -3  -9   8 104931. 4314.13   2
  -3  -9   7 37376.4 2271.22   2
   3   9  -7 36453.9 2190.42   1
  -3   9   7 38059.7 2626.95   1
   3   9  -6 92109.9 3619.36   1
  -3   9   6 91020.4 4254.80   1
   3   9  -6 87210.1 3750.37   2
  -3  -9   6 93617.3 3873.66   2
  -3  -9   5 1371.00 439.003   2
   3   9  -5 1384.47 423.996   1
   3   9  -5 1186.01 437.516   2
  -3   9   5 840.907 547.471   1
   3   9  -4 38932.3 1853.99   1
  -3   9   4 39141.9 2468.25   1
   3   9  -4 37852.4 2218.11   2
  -3  -9   4 38203.0 2233.50   2
   3   9  -3 20557.4 1601.49   2
  -3  -9   3 22566.9 1659.62   2
   3   9  -3 21541.7 1203.28   1
  -3  -9   2 3788.44 742.397   2
   3   9  -2 3239.25 697.325   2
   3   9  -1 9578.72 1141.47   2
   3   9  -1 10227.3 691.926   1
  -3  -9   1 10270.4 1127.96   2
  -3  -9   0 30846.8 2087.56   2
  -3   9   0 34841.4 1453.37   2
   3   9   0 33986.0 1418.73   1
   3   9   0 32421.7 2165.22   2
  -3   9  -1 1663.14 228.843   2
   3   9   1 1053.44 302.228   1
  -3  -9  -1 1909.19 607.506   2
   3   9   1 1024.10 494.914   2
   3   9   2 82487.8 2922.79   1
   3   9   2 86767.8 3996.94   2
   3   9   3 42302.3 2762.65   2
   3   9   3 45110.7 2060.96   1
   3   9   4 116674. 4202.97   1
   3   9   4 121446. 5234.29   2
   3   9   5 70324.3 3923.75   2
   3   9   5 69402.5 3134.81   1
  -3  -9  -5 75142.3 3245.14   1
   3   9   6 68541.3 3256.03   1
   3   9   6 71103.2 3994.10   2
  -3  -9  -6 66314.9 3230.35   1
   3   9   7 36804.3 2909.27   2
  -3  -9  -7 45123.0 2683.09   1
   3   9   7 40411.1 2517.58   1
   3   9   8 15059.4 1926.35   2
   3   9   8 11772.9 1454.38   1
   3   9   9 15123.9 1691.98   1
   3   9   9 14418.9 1925.53   2
   3   9  10 5487.19 1111.64   1
   3   9  10 4614.91 1220.01   2
   3   9  11 37375.7 3315.30   2
   3   9  11 39709.3 3065.81   1
   3   9  12 703.297 691.938   1
   3   9  12 937.960 722.239   2
   3   9  13 20253.4 2389.67   1
   3   9  13 19629.9 2529.83   2
  -3  10  15 29683.4 3122.95   1
  -3  10  14 14917.5 2166.18   1
  -3  10  13 23229.6 2522.36   1
  -3  10  12 3942.76 1200.28   1
  -3  10  11 4891.94 1206.71   1
  -3 -10  10 2122.67 704.465   2
  -3  10  10 758.440 762.222   1
  -3 -10   9 2729.90 652.150   2
  -3  10   9 3582.30 1018.06   1
   3  10  -9 3057.47 759.700   1
  -3 -10   8 7029.00 999.022   2
  -3  10   8 6209.00 1245.31   1
   3  10  -8 9220.14 1140.10   1
  -3 -10   7 119818. 4710.43   2
  -3  10   7 112620. 5185.06   1
   3  10  -7 121934. 4641.23   1
  -3  10   6 1081.41 662.701   1
   3  10  -6 158.250 370.743   1
   3  10  -6 1164.68 496.556   2
  -3 -10   6 1710.22 545.701   2
   3  10  -5 62811.5 3064.61   2
   3  10  -5 67240.2 2824.24   1
  -3  10   5 61206.0 3365.40   1
  -3 -10   5 62021.9 3067.03   2
   3  10  -4 25843.1 1507.91   1
   3  10  -4 23075.5 1745.53   2
  -3 -10   4 26711.9 1849.14   2
  -3  10   4 21556.5 1868.05   1
   3  10  -3 15202.8 1389.11   2
   3  10  -3 14996.8 1032.61   1
  -3 -10   3 14618.9 1371.00   2
  -3 -10   2 1355.74 526.500   2
   3  10  -2 1001.82 518.736   2
  -3  10   1 10487.0 883.311   2
   3  10  -1 9858.90 743.918   1
  -3 -10   1 8969.14 1096.71   2
   3  10   0 12416.5 860.396   1
  -3 -10   0 14604.6 1414.38   2
  -3  10   0 12881.2 870.297   2
   3  10   0 13769.2 1428.85   2
   3  10   1 26297.4 1353.37   1
  -3  10  -1 27379.8 1095.25   2
  -3 -10  -1 26359.5 2006.57   2
   3  10   1 24641.7 2000.28   2
   3  10   2 74.2859 500.049   2
   3  10   2 271.488 220.749   1
   3  10   3 72369.1 2893.41   1
   3  10   3 73731.3 3884.03   2
   3  10   4 959.233 466.129   1
   3  10   4 967.845 721.427   2
   3  10   5 8452.72 999.930   1
   3  10   5 6511.25 1250.05   2
   3  10   6 3.93966 653.475   2
  -3 -10  -6 238.950 353.976   1
   3  10   6 122.647 341.500   1
   3  10   7 367.231 701.867   2
   3  10   7 1207.71 563.233   1
  -3 -10  -7 1207.69 511.615   1
   3  10   8 361.967 447.166   1
   3  10   8-267.229 853.484   2
   3  10   9 8145.37 1529.07   2
   3  10   9 12500.1 1510.34   1
   3  10  10 4636.74 1059.93   1
   3  10  10 3719.29 1174.42   2
   3  10  11 37244.3 2989.97   1
   3  10  11 42388.5 3628.75   2
   3  10  12 18038.2 2142.48   1
   3  10  12 20859.7 2671.60   2
  -3  11  14 277.815 860.054   1
  -3  11  13 70817.3 4671.57   1
  -3  11  12 15443.4 2120.08   1
  -3  11  11 185433. 7895.28   1
  -3 -11  10 24996.2 1990.02   2
  -3  11  10 21534.9 2302.24   1
   3  11  -9 229770. 8008.97   1
  -3  11   9 229532. 8729.60   1
  -3 -11   9 235974. 7824.52   2
   3  11  -8 14555.4 1472.44   1
  -3  11   8 12756.3 1682.70   1
  -3 -11   8 13666.3 1420.05   2
  -3  11   7 107483. 5055.16   1
   3  11  -7 110647. 4434.15   1
  -3 -11   7 107895. 4469.44   2
  -3  11   6 72.1726 504.749   1
   3  11  -6 129.115 323.415   1
   3  11  -6 1027.07 551.749   2
  -3 -11   6-249.793 338.690   2
   3  11  -5 18744.6 1601.00   2
  -3  11   5 16487.8 1717.37   1
   3  11  -5 18457.4 1410.54   1
  -3 -11   5 21016.6 1676.98   2
   3  11  -4 299.415 406.876   2
  -3  11   4-128.970 538.418   1
   3  11  -4-184.577 318.090   1
  -3 -11   4-9.87163 280.909   2
   3  11  -3 689.023 256.839   1
   3  11  -3 444.163 374.265   2
  -3 -11   3 1262.92 471.305   2
  -3  11   3 969.278 403.389   2
  -3  11   2 1056.42 440.410   2
   3  11  -2 704.845 415.003   2
  -3 -11   2 1355.29 513.446   2
   3  11  -1 6407.77 649.279   1
   3  11  -1 7286.40 1066.79   2
  -3  11   1 7292.87 770.921   2
   3  11   0-235.526 217.415   1
  -3  11   0 263.056 214.908   2
   3  11   0 205.084 423.338   2
   3  11   1 18240.6 1161.41   1
   3  11   1 16623.7 1702.95   2
  -3  11  -1 18433.0 913.441   2
   3  11   2 815.201 497.485   2
   3  11   2 316.615 254.101   1
   3  11   3 142701. 4822.61   1
   3  11   3 151130. 6177.64   2
   3  11   4 5796.91 800.522   1
   3  11   4 5193.31 1129.61   2
   3  11   5 215930. 8288.37   2
   3  11   5 211799. 6931.45   1
   3  11   6 6967.91 1033.30   1
   3  11   6 5380.28 1212.11   2
   3  11   7 65853.0 3423.48   1
   3  11   7 67922.4 4285.97   2
   3  11   8 7878.38 1169.99   1
   3  11   8 5872.16 1359.67   2
   3  11   9 18895.3 2302.97   2
   3  11   9 16688.8 1786.56   1
   3  11  10 585.255 598.569   1
   3  11  10 459.007 879.207   2
   3  11  11 18883.8 2479.62   2
   3  11  11 18210.4 2038.61   1
  -3  12  13 18335.2 2318.07   1
  -3  12  12 606.712 802.469   1
  -3  12  11 7195.62 1549.24   1
  -3  12  10 1154.40 856.220   1
  -3 -12   9 982.326 485.301   2
  -3  12   9 1759.93 844.000   1
   3  12  -8 19647.8 1761.05   1
  -3 -12   8 21678.8 1803.93   2
  -3  12   8 17945.3 2045.32   1
  -3 -12   7 33754.7 2265.05   2
   3  12  -7 33547.8 2201.42   1
  -3  12   7 31356.0 2627.67   1
   3  12  -7 33258.5 2216.87   2
   3  12  -6 21100.1 1763.30   2
   3  12  -6 20793.9 1647.00   1
  -3  12   6 20704.3 2061.78   1
  -3 -12   6 23774.5 1856.54   2
   3  12  -5 4688.68 718.836   1
  -3 -12   5 2662.23 701.180   2
   3  12  -5 3223.78 764.046   2
  -3  12   5 4928.77 1099.52   1
  -3  12   4 6158.33 994.285   2
   3  12  -4 7031.38 1041.92   2
  -3  12   4 7778.93 1222.38   1
  -3 -12   4 7270.79 990.201   2
   3  12  -4 7358.21 867.313   1
   3  12  -3 499.550 464.259   2
   3  12  -3 478.582 299.829   1
  -3  12   3-124.083 376.894   2
  -3 -12   3 876.494 461.903   2
   3  12  -2 5523.32 1001.86   2
  -3  12   2 6928.77 871.356   2
  -3 -12   2 4890.70 866.786   2
   3  12  -1 28332.1 1511.95   1
   3  12  -1 27672.7 2145.65   2
  -3  12   1 27441.9 1629.35   2
   3  12   0 2160.83 436.864   1
   3  12   0 2337.65 833.271   2
  -3  12   0 2252.08 419.750   2
   3  12   1 45844.8 2111.57   1
  -3  12  -1 48068.4 1779.83   2
   3  12   1 46060.7 2993.57   2
   3  12   2 12102.7 1043.43   1
   3  12   2 9921.35 1428.57   2
   3  12   3 30535.1 1780.80   1
   3  12   3 29330.8 2484.74   2
   3  12   4 10027.7 1059.45   1
   3  12   4 11695.6 1659.08   2
   3  12   5 3383.18 726.336   1
   3  12   5 3499.43 1019.14   2
   3  12   6 5828.70 1317.93   2
   3  12   6 4696.63 857.624   1
   3  12   7 637.275 487.792   1
   3  12   7-2048.89 944.014   2
   3  12   8 1047.52 570.638   1
   3  12   8 744.914 755.076   2
   3  12   9 1306.35 449.749   1
   3  12   9 1492.28 849.446   2
   3  12  10 1843.78 785.467   1
   3  12  10 2383.89 1036.71   2
   3  12  11 50491.9 3544.01   1
   3  12  11 57961.8 4428.60   2
  -3  13  13 11832.0 1960.70   1
  -3  13  12 17533.1 2235.32   1
  -3  13  11 71830.5 4619.99   1
  -3  13  10 18684.8 2216.41   1
  -3  13   9 92930.3 5072.13   1
  -3  13   8 17534.5 2068.93   1
  -3 -13   7 81887.0 3872.42   2
   3  13  -7 84431.4 3854.77   1
   3  13  -7 78832.5 3776.93   2
  -3  13   7 80520.6 4464.62   1
  -3 -13   6 82637.4 3867.23   2
  -3  13   6 85539.0 4458.09   2
   3  13  -6 81841.2 3856.09   2
  -3  13   6 79526.1 4366.06   1
   3  13  -6 81598.8 3663.78   1
   3  13  -5 40093.9 2275.71   1
   3  13  -5 38546.2 2501.71   2
  -3  13   5 38744.1 2856.47   1
  -3 -13   5 37464.5 2448.83   2
  -3  13   5 42412.8 2816.35   2
  -3  13   4 84563.1 3960.37   2
   3  13  -4 75682.0 3773.87   2
  -3 -13   4 82998.0 3870.26   2
   3  13  -4 80486.8 3344.15   1
  -3  13   4 77765.1 4173.00   1
   3  13  -3 133.785 365.997   2
  -3 -13   3 1672.14 529.131   2
  -3  13   3 934.131 484.476   2
   3  13  -3-319.484 328.111   1
  -3  13   2 3213.46 641.405   2
   3  13  -2 2844.18 783.464   2
   3  13  -1 3544.97 869.729   2
  -3  13   1 2429.81 510.721   2
   3  13  -1 2340.65 479.285   1
   3  13   0 42109.4 2891.31   2
   3  13   0 45036.9 2137.31   1
  -3  13   0 49599.9 2133.03   2
  -3  13  -1 13246.9 849.815   2
   3  13   1 12520.0 1070.08   1
   3  13   1 13058.8 1610.99   2
   3  13   2 72494.4 4060.71   2
   3  13   2 69902.0 2956.48   1
   3  13   3 71969.5 4174.58   2
   3  13   3 70315.3 3062.20   1
   3  13   4 24350.0 1715.55   1
   3  13   4 20084.3 2219.17   2
   3  13   5 63533.1 4128.84   2
   3  13   5 66243.2 3199.98   1
   3  13   6 5351.72 913.243   1
   3  13   6 6040.59 1297.32   2
   3  13   7 69504.6 4541.54   2
   3  13   7 63375.5 3441.24   1
   3  13   8 308.123 569.766   1
   3  13   8-70.5231 583.102   2
   3  13   9 24808.3 2275.20   1
   3  13   9 27902.0 2949.77   2
   3  13  10 548.843 632.084   1
   3  13  10-1612.61 990.718   2
  -3  14  12 1241.21 875.199   2
  -3  14  12 5.56750 812.638   1
  -3  14  11 3788.60 1158.06   1
  -3  14  11 9138.98 1803.27   2
  -3  14  10 6641.16 1384.96   1
  -3  14  10 5006.80 1400.21   2
  -3  14   9 4107.09 1311.30   2
  -3  14   9 3526.72 986.650   1
  -3  14   8 22023.2 2348.73   1
  -3  14   8 24435.1 2559.39   2
   3  14  -7 60630.4 3257.53   2
  -3  14   7 64916.2 4059.31   2
  -3  14   7 61501.6 3908.06   1
   3  14  -6 9326.00 1246.07   2
  -3  14   6 8031.61 1467.72   1
  -3  14   6 7598.36 1287.77   2
   3  14  -5 143017. 5724.62   2
  -3  14   5 145786. 6087.33   2
  -3  14   5 148629. 6411.69   1
   3  14  -5 149620. 5378.53   1
   3  14  -4 2797.01 635.981   1
  -3  14   4 3193.77 980.781   1
  -3  14   4 4026.42 926.071   2
   3  14  -4 3855.99 841.316   2
   3  14  -3 139701. 5678.87   2
  -3  14   3 141857. 5407.36   2
  -3  14   3 133312. 5971.09   1
   3  14  -3 139452. 4868.56   1
   3  14  -2 41503.5 2827.00   2
   3  14  -2 47618.4 2286.34   1
  -3  14   2 46035.5 2524.70   2
  -3  14   1 123000. 4478.13   2
   3  14  -1 128685. 5503.08   2
   3  14  -1 121641. 4288.09   1
   3  14   0 20060.7 2023.69   2
   3  14   0 21535.3 1452.59   1
  -3  14   0 23195.3 1420.67   2
   3  14   1 77519.6 3194.46   1
  -3  14  -1 79375.5 2716.47   2
   3  14   1 80197.7 4344.73   2
   3  14   2-39.5210 577.169   2
   3  14   2-288.519 342.233   1
   3  14   3 46896.2 2416.63   1
   3  14   3 45220.5 3348.32   2
   3  14   4-929.879 719.296   2
   3  14   4-83.6092 302.080   1
   3  14   5 15729.4 1487.07   1
   3  14   5 16137.2 2135.61   2
   3  14   6 1989.17 613.313   1
   3  14   6 3167.34 1034.63   2
   3  14   7-405.206 717.911   2
   3  14   7-1733.51 686.536   1
   3  14   8-54.1011 460.876   1
   3  14   8 1217.24 929.628   2
   3  14   9 11431.3 1545.27   1
   3  14   9 14967.4 2289.65   2
  -3  15  10 13237.2 1933.91   1
  -3  15  10 9574.56 1747.07   2
  -3  15   9 928.534 717.592   1
  -3  15   9 269.539 685.407   2
  -3  15   8 7782.61 1502.77   1
  -3  15   8 8794.64 1640.15   2
  -3  15   7 7504.70 1403.34   1
  -3  15   7 8486.83 1499.26   2
   3  15  -7 11449.0 1359.63   2
   3  15  -6 58001.6 3237.43   2
  -3  15   6 56060.5 3661.63   2
  -3  15   6 55846.0 3743.53   1
   3  15  -5 8705.05 1211.93   2
  -3  15   5 6844.44 1338.46   1
  -3  15   5 8164.74 1287.02   2
   3  15  -4 64654.6 3558.17   2
  -3  15   4 61566.0 3855.87   1
  -3  15   4 67068.3 3597.81   2
   3  15  -3 391.504 480.013   2
  -3  15   3-203.177 692.845   1
  -3  15   3 463.276 422.254   2
   3  15  -2 185.168 329.141   1
  -3  15   2 425.570 410.922   2
   3  15  -1 916.741 672.375   2
  -3  15   1 657.294 350.803   2
   3  15  -1 139.328 359.719   1
  -3  15   0 32107.2 1759.90   2
   3  15   0 32269.0 1877.42   1
   3  15   0 29535.4 2524.29   2
   3  15   1 954.740 674.111   2
   3  15   1 2383.02 581.237   1
   3  15   2 52894.2 2606.46   1
   3  15   2 53736.8 3646.79   2
   3  15   3 17629.0 2136.89   2
   3  15   3 23536.9 1674.08   1
   3  15   4 18136.7 2217.84   2
   3  15   4 20308.2 1615.06   1
   3  15   5 36942.7 2341.54   1
   3  15   5 37395.2 3282.39   2
   3  15   6 26641.8 2066.65   1
   3  15   6 25814.2 2858.11   2
   3  15   7 45346.0 3853.83   2
   3  15   8 30669.0 3244.49   2
  -3  16   9 1143.35 828.052   2
  -3  16   9 5.20433 710.854   1
  -3  16   8 3547.96 1060.46   1
  -3  16   8 6509.43 1436.26   2
  -3  16   7 5310.88 1237.85   1
  -3  16   7 6314.05 1406.33   2
   3  16  -6 32433.2 2415.53   2
  -3  16   6 37569.9 2930.21   2
  -3  16   6 34994.3 2997.64   1
   3  16  -5 19576.1 1850.87   2
  -3  16   5 15891.1 2029.69   1
  -3  16   5 19523.5 2030.58   2
   3  16  -4 138952. 5742.85   2
  -3  16   4 135496. 5662.47   2
  -3  16   4 121346. 6014.95   1
   3  16  -3 81534.4 4231.29   2
  -3  16   3 77001.2 4470.16   1
  -3  16   3 80121.3 3926.59   2
   3  16  -2 218380. 8286.69   2
   3  16  -2 231271. 7133.90   1
  -3  16   2 223643. 7510.53   2
   3  16  -1 94357.3 3791.72   1
   3  16  -1 94514.8 4880.51   2
  -3  16   1 103671. 4011.08   2
   3  16   0 120023. 5695.24   2
   3  16   1 21695.8 2277.82   2
   3  16   2 12598.7 1815.11   2
   3  16   3 914.691 653.156   2
   3  16   4 5910.21 1444.09   2
   3  16   5 2260.28 986.382   2
   3  16   6 1828.01 934.350   2
  -3  17   7 16397.8 2124.66   1
  -3  17   7 16099.0 2062.82   2
  -3  17   6 32056.1 2758.92   2
  -3  17   6 29396.7 2802.19   1
   3  17  -5 18627.6 1869.88   2
  -3  17   5 25167.1 2296.75   2
  -3  17   5 20399.5 2333.32   1
   3  17  -4 17917.3 1895.67   2
  -3  17   4 16243.0 2032.15   1
  -3  17   4 17363.8 1813.78   2
  -3  17   3 1526.87 871.225   1
   3  17  -3 4216.70 995.654   2
  -3  17   3 3698.77 845.847   2
   3  17  -2 2694.82 944.435   2
  -3  17   2-651.033 750.383   1
   3  17  -1 3039.78 940.677   2
   3  17   0 11261.6 1694.12   2
   3  17   1 9890.06 1568.12   2
   3  17   2 18416.3 2235.08   2
   3  17   3 3884.42 1161.39   2
   3  17   4 27902.8 2902.41   2
   3  17   5 1971.47 1030.07   2
   3  18  -4 54313.7 3411.40   2
  -3  18   4 47749.9 3639.97   1
   3  18  -3 779.805 650.568   2
  -3  18   3 672.828 847.931   1
   3  18  -2 135650. 6105.33   2
  -3  18   2 127067. 6302.80   1
   3  18  -1 512.386 572.713   2
   3  18   0 86734.7 4906.53   2
   3  18   1 494.683 777.776   2
   3  18   2 34777.4 3122.36   2
  -4   0  17 1211.70 1016.01   1
  -4   0  16 108011. 6008.51   1
  -4   0  15 1124.23 925.726   1
  -4   0  14 7793.62 1492.77   1
  -4   0  13 1522.46 816.399   1
  -4   0  12 19952.5 2016.57   1
  -4   0  11 565.267 636.801   1
   4   0 -10 3773.56 838.213   1
  -4   0  10 5437.51 1018.71   1
  -4   0   9 1259.67 630.088   1
   4   0  -9 1140.18 564.900   1
   4   0  -8 7101.69 955.251   1
  -4   0   8 5555.93 913.873   1
   4   0  -7 1095.80 459.456   1
  -4   0   7 2035.69 610.399   1
  -4   0   6 80737.8 3195.72   1
   4   0  -6 74668.0 3077.03   1
   4   0  -5 50.6321 259.658   1
  -4   0   5 312.493 345.356   1
  -4   0   5 430.842 365.328   2
  -4   0   4 29517.9 1520.24   1
  -4   0   4 27120.3 1593.54   2
  -4   0   3 58.3783 250.445   2
  -4   0   3 333.444 271.819   1
  -4   0   2 20526.9 1259.04   2
  -4   0   1 237.234 253.362   2
   4   0   0 65284.4 2481.69   2
  -4   0   0 56810.2 2351.94   2
   4   0   1 302.955 312.679   2
  -4   0  -1 418.734 261.059   2
  -4   0  -2 210107. 6306.02   2
   4   0   2 221633. 6385.95   2
  -4   0  -3 1341.35 487.935   1
  -4   0  -3 2729.82 542.517   2
   4   0   3 2345.55 582.001   2
  -4   0  -4 25436.3 1751.56   1
   4   0   4 25096.8 1586.03   2
  -4   0  -5 729.336 451.723   1
   4   0   5 312.816 403.452   2
  -4   0  -6 255.264 476.626   1
   4   0   6 1619.63 657.669   2
  -4   0  -7 328.938 449.099   1
   4   0   7 593.938 502.343   2
   4   0   8 43107.6 2561.44   2
   4   0   9 673.242 620.902   2
   4   0  10 19341.0 1808.79   2
   4   0  11 49.3234 380.915   2
   4   0  12 57073.2 3520.33   2
   4   0  13-1075.65 689.659   2
   4   0  14 133438. 6173.77   2
  -4  -1  17 4225.36 1472.19   1
  -4   1  17 3810.22 1297.82   1
  -4   1  16 27548.7 2845.20   1
  -4  -1  16 23459.8 2668.52   1
  -4   1  15 413.474 753.209   1
  -4  -1  15-2767.07 1059.69   1
  -4  -1  14 58935.8 3938.42   1
  -4   1  14 58244.9 3929.01   1
  -4  -1  13 887.347 683.477   1
  -4   1  13 530.057 635.624   1
  -4   1  12 30108.7 2509.70   1
  -4  -1  12 26826.6 2358.20   1
  -4   1  11 1058.99 637.225   1
  -4  -1  11 2410.87 850.972   1
   4   1 -10 114149. 4679.08   1
  -4   1  10 108121. 4753.03   1
   4  -1 -10 109464. 4678.91   1
   4   1  -9 28292.2 1993.87   1
  -4   1   9 26742.6 2043.61   1
   4  -1  -9 24150.0 1901.13   1
  -4  -1   9 30772.5 2144.89   1
  -4   1   8 252020. 8057.25   1
   4  -1  -8 246233. 7958.19   1
  -4  -1   8 258625. 8001.51   1
   4   1  -8 255581. 7902.54   1
  -4   1   7 26197.0 1780.94   1
  -4  -1   7 26102.4 1716.94   1
   4  -1  -7 23619.1 1667.54   1
   4   1  -7 25369.9 1656.31   1
  -4   1   6 67651.5 2954.83   1
  -4  -1   6 63673.2 2782.52   1
  -4  -1   6 71943.8 3046.06   2
   4  -1  -6 60558.3 2812.17   1
   4   1  -6 76343.2 2906.43   1
  -4  -1   5 103757. 3650.98   1
  -4  -1   5 102562. 3895.90   2
   4   1  -5 114384. 3718.42   1
  -4   1   5 105445. 3838.71   1
   4  -1  -5 108176. 3819.16   1
  -4  -1   4 14738.2 1159.05   2
  -4   1   4 13349.5 1065.87   2
   4   1  -4 13708.2 924.744   1
  -4   1   4 14310.6 1076.98   1
  -4  -1   4 13223.3 946.885   1
  -4  -1   3 626.680 255.344   1
  -4  -1   3 284.645 260.216   2
  -4   1   3 717.013 308.217   2
  -4  -1   2 625.401 305.136   2
  -4   1   2 500.060 279.944   2
   4  -1  -2 117.387 237.479   2
  -4  -1   1 17181.1 1157.53   2
  -4   1   1 16918.2 1058.83   2
   4  -1  -1 14224.5 1002.68   2
  -4   1   0 309.682 245.122   2
   4  -1   0 138.399 257.188   2
   4   1   1 147598. 4615.24   2
   4  -1   1 131915. 4255.38   2
  -4  -1  -1 137010. 4500.51   2
  -4   1  -1 140848. 4296.21   2
   4  -1   2 120127. 4152.94   2
   4   1   2 134383. 4499.84   2
  -4  -1  -2 154394. 4636.19   2
  -4   1  -2 141251. 4275.05   2
  -4  -1  -2 131225. 4371.02   1
  -4   1  -3 180776. 5781.42   1
  -4  -1  -3 184736. 5685.20   1
  -4  -1  -3 185669. 5640.15   2
  -4   1  -3 170936. 5256.54   2
   4  -1   3 175039. 5292.48   2
  -4   1  -4 531753. 14947.1   1
  -4  -1  -4 542648. 14840.5   1
   4   1   4 574515. 14800.9   2
   4  -1   4 544260. 14362.2   2
  -4   1  -5 48445.7 2705.54   1
  -4  -1  -5 49236.8 2652.69   1
   4  -1   5 44000.7 2237.67   2
  -4  -1  -6 514180. 14396.5   1
  -4   1  -6 500429. 14466.9   1
   4   1   6 500546. 13978.9   2
   4  -1   6 504183. 13676.5   2
  -4  -1  -7 68165.1 3520.48   1
  -4   1  -7 69194.1 3600.77   1
   4  -1   7 65054.7 3015.80   2
   4   1   7 59956.8 3131.93   2
   4  -1   8 217689. 6999.19   2
   4   1   8 200268. 7132.76   2
   4   1   9 43283.8 2748.12   2
   4  -1   9 44691.4 2613.11   2
   4  -1  10 43979.6 2721.17   2
   4   1  10 47913.7 3003.07   2
   4   1  11 855.716 642.659   2
   4  -1  11 3.07171 436.145   2
   4   1  12 1576.09 725.666   2
   4  -1  12 296.471 520.042   2
   4  -1  13 1222.83 738.805   2
   4   1  13 444.331 687.582   2
   4   1  14 287.848 737.920   2
   4  -1  14 1313.90 791.116   2
  -4   2  17 62937.9 4594.64   1
  -4  -2  17 56817.9 4380.48   1
  -4   2  16 10311.4 1754.49   1
  -4  -2  16 8154.25 1589.97   1
  -4   2  15 28536.9 2826.63   1
  -4  -2  15 27615.2 2774.27   1
  -4   2  14 45.0780 919.947   1
  -4  -2  14 790.057 804.936   1
  -4  -2  13 29213.0 2577.20   1
  -4   2  13 27382.3 2530.59   1
  -4  -2  12 3083.26 908.261   1
  -4   2  12 6412.04 1209.79   1
  -4  -2  11 2286.39 794.132   1
  -4   2  11 464.667 645.254   1
   4  -2 -10 1941.93 633.018   1
   4   2 -10 2043.74 604.435   1
  -4  -2  10 1321.66 602.802   1
  -4   2  10 1569.29 738.874   1
   4   2  -9 1190.50 496.804   1
  -4  -2   9 2310.91 762.570   1
  -4   2   9 1518.28 612.293   1
   4   2  -8 47377.7 2466.18   1
  -4  -2   8 43573.0 2489.79   2
   4  -2  -8 49206.4 2638.19   1
  -4  -2   8 39781.0 2370.19   1
  -4  -2   7 3478.55 697.775   1
   4   2  -7 3843.41 650.461   1
  -4  -2   7 4212.01 748.015   2
   4  -2  -7 4354.33 770.642   1
  -4  -2   6 196892. 6366.75   2
  -4  -2   6 180926. 5986.20   1
   4  -2  -6 193478. 6309.23   1
   4   2  -5 33201.6 1644.16   1
  -4  -2   5 34580.1 1941.02   2
  -4  -2   5 35464.7 1695.83   1
  -4  -2   4 251883. 6968.06   1
  -4  -2   4 257965. 7584.86   2
   4   2  -4 257869. 6949.22   1
  -4  -2   3 53212.9 2379.06   2
  -4   2   3 51498.3 2206.59   2
  -4  -2   3 53322.5 1893.01   1
  -4   2   2 61467.4 2395.74   2
  -4  -2   2 62088.0 2595.97   2
  -4  -2   2 62997.4 2028.09   1
   4  -2  -1 27879.1 1373.05   2
  -4  -2   1 24378.6 1493.08   2
  -4   2   1 26426.2 1327.43   2
  -4   2   0 153884. 4482.17   2
  -4  -2   0 150764. 4904.58   2
   4  -2   0 149776. 4495.03   2
  -4   2  -1 28259.6 1336.53   2
   4  -2   1 26166.9 1308.73   2
  -4  -2  -1 26041.9 1315.21   1
  -4  -2  -1 25828.4 1576.75   2
  -4  -2  -2 196919. 5848.42   1
   4  -2   2 206777. 5679.18   2
  -4  -2  -2 212220. 6255.90   2
  -4   2  -2 182673. 5541.31   2
   4   2   2 195915. 6173.54   2
  -4  -2  -3 64801.8 2682.37   1
  -4   2  -3 58919.6 2314.03   2
  -4  -2  -3 55885.0 2683.11   2
   4   2   3 56887.0 2707.57   2
   4  -2   3 64131.0 2376.34   2
  -4   2  -4 89042.8 3808.18   1
  -4  -2  -4 87855.0 3588.47   1
   4   2   4 86792.1 3642.71   2
   4  -2   4 93717.5 3243.29   2
  -4   2  -5 4519.83 845.925   1
   4   2   5 4780.55 812.621   2
   4  -2   5 4288.89 621.487   2
  -4  -2  -5 4152.14 735.641   1
  -4   2  -6 897.236 465.878   1
   4   2   6 987.961 532.239   2
  -4  -2  -6 173.795 340.053   1
   4  -2   6 437.255 361.955   2
  -4  -2  -7 3917.74 848.266   1
   4   2   7 4144.62 854.994   2
   4  -2   7 3616.11 659.621   2
   4   2   8 51837.3 3022.46   2
   4  -2   8 55318.6 2727.31   2
   4   2   9 340.156 480.449   2
   4  -2   9 775.502 538.340   2
   4   2  10 44288.8 3009.20   2
   4  -2  10 50590.1 2813.73   2
   4   2  11 8799.81 1363.53   2
   4  -2  11 8680.43 1204.46   2
   4   2  12 59191.0 3725.07   2
   4  -2  12 53998.5 3230.96   2
   4   2  13 35282.9 2963.96   2
   4  -2  13 37332.0 2692.68   2
   4   2  14 54520.8 3843.16   2
   4  -2  14 53214.1 3411.80   2
  -4   3  17 11895.0 2054.26   1
  -4  -3  17 10293.4 1926.46   1
  -4  -3  16 28657.1 2959.77   1
  -4   3  16 28723.5 3000.53   1
  -4  -3  15-113.474 773.238   1
  -4   3  15-185.472 848.130   1
  -4  -3  14 65590.7 4162.22   1
  -4   3  14 60798.8 4099.59   1
  -4  -3  13 34961.0 2854.35   1
  -4   3  13 31012.9 2761.49   1
  -4  -3  12 80275.4 4300.56   1
  -4   3  12 80628.6 4383.13   1
  -4  -3  11 78218.7 4033.76   1
  -4   3  11 75562.6 4046.07   1
  -4  -3  10 23372.3 1965.99   1
   4   3 -10 26138.6 1974.93   1
  -4   3  10 22216.8 1985.43   1
  -4  -3  10 25664.6 2009.92   2
   4   3  -9 182822. 6508.56   1
  -4  -3   9 195575. 6782.20   1
  -4   3   9 184618. 6854.13   1
   4  -3  -9 209587. 7030.89   1
  -4  -3   9 202954. 6830.70   2
  -4  -3   8 52362.1 2722.27   1
   4   3  -8 52249.0 2631.98   1
  -4  -3   8 51305.8 2755.61   2
   4  -3  -8 57392.9 2944.46   1
   4   3  -7 138774. 4658.51   1
  -4  -3   7 138653. 4974.44   2
  -4  -3   7 142043. 4827.57   1
   4   3  -6 1372.83 408.672   1
  -4  -3   6 1589.91 436.922   1
  -4  -3   6 1741.29 499.746   2
  -4  -3   5 73946.8 3141.31   2
   4   3  -5 71939.4 2653.70   1
  -4  -3   5 76605.9 2774.64   1
  -4  -3   4 3134.53 440.031   1
  -4  -3   4 3048.00 617.752   2
   4   3  -4 3549.18 441.860   1
  -4  -3   3 1764.94 486.991   2
  -4  -3   3 965.103 229.687   1
  -4  -3   2 48402.7 2278.54   2
  -4  -3   2 46408.7 1506.56   1
  -4   3   2 51958.9 2048.04   2
  -4   3   1 142809. 4341.16   2
  -4  -3   1 151890. 4899.66   2
  -4   3   0 2568.52 399.945   2
   4  -3   0 2189.99 390.683   2
  -4  -3   0 2182.10 316.799   1
  -4  -3   0 3433.05 627.736   2
  -4  -3  -1 291200. 8599.03   2
   4  -3   1 300042. 7818.34   2
  -4  -3  -1 294063. 7862.80   1
  -4   3  -1 297534. 7789.49   2
   4  -3   2 15768.3 922.837   2
  -4  -3  -2 16419.0 1075.81   1
  -4  -3  -2 15552.8 1278.82   2
  -4   3  -2 17431.6 944.888   2
  -4  -3  -3 147961. 4758.24   1
   4  -3   3 145628. 4251.09   2
  -4  -3  -3 134324. 4969.70   2
   4   3   3 139464. 5070.90   2
  -4  -3  -4 82641.9 3453.81   1
   4   3   4 87933.5 3739.35   2
   4  -3   4 89015.7 2988.17   2
  -4  -3  -5 29625.9 1952.80   1
  -4   3  -5 27380.9 2033.33   1
   4   3   5 28579.0 1996.45   2
   4  -3   5 29444.2 1530.98   2
   4   3   6 75230.6 3558.61   2
   4  -3   6 73314.1 2867.47   2
   4   3   6 69687.3 3359.07   1
  -4  -3  -6 72766.7 3497.99   1
  -4   3  -6 69081.0 3630.55   1
   4   3   7 33436.6 2352.11   1
  -4  -3  -7 39663.4 2555.86   1
   4  -3   7 33470.8 1876.11   2
   4   3   7 36135.1 2434.12   2
   4   3   8 2198.30 749.046   1
   4   3   8 4104.52 923.159   2
   4  -3   8 4318.82 716.992   2
   4   3   9 84005.9 4363.57   1
   4   3   9 96355.1 4534.22   2
   4  -3   9 86267.1 3680.23   2
   4  -3  10 1789.03 557.824   2
   4   3  10 1981.32 844.942   1
   4   3  10 2003.15 785.344   2
   4  -3  11 14497.6 1503.76   2
   4   3  11 12291.1 1686.44   2
   4   3  12-60.3748 698.582   2
   4  -3  12 1644.77 628.217   2
   4   3  13 23.3266 871.902   2
   4  -3  13 449.556 503.603   2
   4   3  14 1281.37 1020.71   2
  -4  -4  17 12559.3 2036.24   1
  -4   4  17 5644.82 1596.83   1
  -4  -4  16 3571.85 1257.54   1
  -4   4  16 3222.13 1126.94   1
  -4  -4  15 41317.8 3452.34   1
  -4   4  15 47613.5 3723.45   1
  -4   4  14 12186.6 1868.32   1
  -4  -4  14 8540.98 1590.09   1
  -4  -4  13 50258.3 3540.40   1
  -4   4  13 60030.9 3859.01   1
  -4   4  12 4506.74 1214.21   1
  -4  -4  12 7045.75 1304.27   1
  -4  -4  11 5696.29 1080.87   1
  -4   4  11 6759.15 1242.58   1
  -4  -4  10 1057.10 522.508   2
   4   4 -10 448.252 456.710   1
  -4   4  10 525.543 597.309   1
  -4  -4  10 1633.22 678.289   1
  -4   4   9 25607.3 2080.73   1
   4   4  -9 22573.6 1768.97   1
   4  -4  -9 25312.5 2002.06   1
  -4  -4   9 24847.7 1896.80   2
  -4  -4   9 22709.5 1840.47   1
   4   4  -8 63610.8 2996.45   1
  -4  -4   8 74293.3 3360.75   2
  -4  -4   8 63820.8 3096.57   1
   4  -4  -8 66126.4 3329.84   1
   4   4  -7 66075.1 2815.11   1
  -4  -4   7 62586.0 3048.66   2
  -4  -4   7 62812.2 2866.37   1
   4  -4  -7 71557.1 3283.10   1
   4   4  -6 82344.8 2967.50   1
  -4  -4   6 72659.6 2964.34   1
  -4  -4   6 73700.4 3279.29   2
   4   4  -5 136479. 4189.07   1
  -4  -4   5 134010. 4266.44   1
  -4  -4   5 142066. 4885.84   2
  -4  -4   4 134919. 4802.36   2
  -4  -4   4 135131. 4049.68   1
   4   4  -4 146244. 4025.06   1
  -4  -4   3 323040. 9761.47   2
  -4  -4   3 356174. 8723.70   1
  -4   4   2 104057. 3397.85   2
  -4  -4   2 99598.7 3806.99   2
  -4  -4   1 540892. 14242.7   2
  -4   4   1 524495. 13423.8   2
  -4  -4   0 299768. 7431.17   1
  -4   4   0 287979. 7741.56   2
  -4  -4   0 308370. 8756.15   2
  -4   4  -1 58290.1 1964.94   2
  -4  -4  -1 60532.0 2759.79   2
  -4  -4  -1 57869.3 2022.20   1
   4  -4   2 261113. 6793.61   2
  -4  -4  -2 254760. 7165.65   1
  -4   4  -2 268114. 6789.78   2
  -4  -4  -2 244323. 7865.48   2
  -4  -4  -3 2310.92 568.645   2
  -4  -4  -3 3112.05 523.658   1
   4  -4   3 3164.41 379.075   2
   4   4   4 18745.2 1354.73   1
  -4  -4  -4 19075.7 1387.45   1
   4  -4   4 19386.6 1021.51   2
   4   4   4 19334.5 1640.64   2
  -4  -4  -5 60.8356 326.813   1
   4   4   5-85.2015 390.432   1
  -4   4  -5 456.755 487.809   1
   4  -4   5 453.681 248.921   2
   4   4   5 759.795 564.329   2
   4   4   6 2063.45 739.434   2
   4  -4   6 3455.89 527.055   2
   4   4   6 2107.83 635.661   1
  -4  -4  -6 1840.90 532.063   1
   4   4   7 2649.98 730.149   2
   4  -4   7 3093.04 515.209   2
  -4  -4  -7 3197.10 700.216   1
   4   4   7 2777.77 755.357   1
  -4  -4  -8 14648.4 1611.99   1
   4  -4   8 12457.9 1099.62   2
   4   4   8 12580.3 1499.33   1
   4   4   8 15362.6 1719.37   2
   4   4   9 8071.76 1226.65   1
   4  -4   9 9416.49 1014.62   2
   4   4   9 8255.50 1342.53   2
   4  -4  10 9953.34 1113.22   2
   4   4  10 8274.45 1354.19   1
   4   4  10 10125.9 1490.27   2
   4   4  11 31233.0 2733.71   1
   4  -4  11 36828.6 2295.76   2
   4   4  11 31150.7 2758.13   2
   4   4  12 4118.85 1171.73   1
   4   4  12 3622.27 950.780   2
   4  -4  12 4959.35 906.607   2
   4   4  13 47175.0 3655.79   2
   4   4  14 10716.4 1779.75   2
  -4  -5  17-2573.69 1070.19   1
  -4   5  17-116.094 848.973   1
  -4   5  16 6312.01 1441.85   1
  -4  -5  16 7184.81 1545.25   1
  -4   5  15 19132.3 2379.29   1
  -4  -5  15 20325.9 2398.03   1
  -4  -5  14 10713.4 1769.58   1
  -4   5  14 8910.59 1695.17   1
  -4  -5  13 121688. 5910.81   1
  -4   5  13 128704. 6099.95   1
  -4  -5  12 19564.2 2118.43   1
  -4   5  12 21043.4 2203.63   1
  -4  -5  11 157648. 6338.39   1
  -4   5  11 145629. 6270.26   1
  -4  -5  10 586.307 499.945   1
  -4  -5  10 1268.15 520.524   2
  -4   5  10 1079.11 667.771   1
   4   5 -10 1818.37 613.717   1
  -4   5   9 87001.9 4228.72   1
   4   5  -9 86823.0 3798.72   1
  -4  -5   9 91463.8 4036.77   2
  -4  -5   9 84916.0 3917.27   1
   4   5  -8 667.102 409.588   1
  -4  -5   8 559.653 450.062   1
  -4  -5   8 974.172 455.701   2
   4  -5  -8 149.261 471.640   1
  -4  -5   7 114376. 4542.89   2
   4   5  -7 122093. 4242.33   1
  -4  -5   7 119230. 4365.86   1
  -4  -5   6 44349.1 2429.85   2
   4   5  -6 44269.4 2040.46   1
  -4  -5   6 46121.6 2169.25   1
  -4  -5   5 47594.9 2015.03   1
  -4  -5   5 48229.1 2484.38   2
   4   5  -5 49207.4 1944.33   1
   4   5  -5 44315.4 2390.77   2
   4   5  -4 47690.7 1723.97   1
  -4  -5   4 48431.4 2454.31   2
  -4  -5   4 48763.7 1791.03   1
  -4  -5   3 39158.6 2151.02   2
   4   5  -3 39566.0 1241.58   1
  -4  -5   2 2784.47 621.721   2
  -4   5   1 58057.4 2135.36   2
  -4  -5   1 60127.4 2784.13   2
  -4   5   0 24355.2 1107.59   2
  -4  -5   0 26917.0 1763.04   2
  -4  -5  -1 114519. 3363.60   1
  -4   5  -1 120539. 3300.30   2
  -4  -5  -1 119129. 4457.59   2
  -4   5  -2 224.291 125.994   2
  -4  -5  -2 66.0591 200.725   1
  -4  -5  -3 93109.2 3226.22   1
   4  -5   3 84429.2 2482.08   2
  -4  -5  -3 84730.9 3772.11   2
   4   5   3 90976.1 3186.40   1
   4  -5   4 231.103 143.706   2
  -4  -5  -4 265.381 284.244   1
   4  -5   5 36216.8 1423.82   2
  -4  -5  -5 33334.0 2033.43   1
   4   5   5 32974.4 2004.21   1
   4   5   5 33550.9 2337.42   2
   4   5   6 4718.27 804.513   1
   4  -5   6 5960.81 588.150   2
  -4  -5  -6 6056.93 927.538   1
   4   5   6 6232.09 1071.70   2
  -4  -5  -7 20879.9 1801.64   1
   4   5   7 20028.6 1728.57   1
   4   5   7 21444.0 1974.91   2
   4  -5   7 19340.1 1192.78   2
   4   5   8 2644.26 791.321   1
  -4  -5  -8 1441.08 604.282   1
   4   5   8 3631.51 965.420   2
   4  -5   8 3979.54 579.698   2
   4  -5   9 30806.7 1770.55   2
   4   5   9 32415.6 2665.94   2
   4   5   9 28251.7 2340.94   1
   4   5  10 1308.42 782.730   1
   4   5  10 844.357 601.651   2
   4  -5  10 2468.83 602.349   2
   4   5  11 5326.84 1223.77   2
   4   5  11 7475.29 1380.76   1
   4  -5  11 5667.73 859.535   2
   4   5  12 300.633 584.119   1
   4   5  12 145.085 652.520   2
   4   5  13 334.824 721.367   1
   4   5  13-511.212 924.301   2
  -4  -6  17 6723.80 1660.27   1
  -4   6  17 3306.86 1232.08   1
  -4   6  16 1733.77 927.499   1
  -4  -6  16 3185.44 1155.89   1
  -4  -6  15 61679.6 4246.19   1
  -4   6  15 63018.2 4398.39   1
  -4   6  14 1933.70 949.344   1
  -4  -6  14 1594.21 867.198   1
  -4   6  13 81880.0 4778.76   1
  -4  -6  13 89838.3 4826.20   1
  -4  -6  12 101.073 698.157   1
  -4   6  12 1460.86 913.273   1
  -4  -6  11 6187.64 1092.30   1
  -4   6  11 6350.68 1267.64   1
  -4  -6  10 893.046 608.261   1
  -4  -6  10 3097.40 701.641   2
  -4   6  10 491.162 696.726   1
   4   6 -10 2161.57 646.113   1
  -4   6   9 50019.4 3140.64   1
  -4  -6   9 54932.5 3006.36   2
   4   6  -9 59892.9 2952.49   1
  -4  -6   9 53846.9 2999.08   1
  -4   6   8 13231.3 1472.51   1
  -4  -6   8 11337.6 1247.21   2
   4   6  -8 9855.21 1070.55   1
  -4  -6   8 10053.4 1147.24   1
  -4  -6   7 109555. 4352.59   2
   4   6  -7 104947. 3908.94   1
  -4  -6   7 107567. 4062.11   1
  -4  -6   6 2311.13 649.878   2
   4   6  -6 1063.17 526.435   2
  -4  -6   6 1583.22 447.623   1
   4   6  -6 1522.25 443.916   1
  -4  -6   5 331123. 9968.00   2
   4   6  -5 353030. 9063.08   1
   4   6  -5 325590. 9909.93   2
  -4  -6   4 42813.6 2304.63   2
   4   6  -4 39267.5 1499.75   1
   4   6  -4 37907.4 2217.51   2
   4   6  -3 916702. 22008.8   2
  -4  -6   3 901120. 21985.6   2
  -4  -6   2 1377.59 509.880   2
  -4  -6   1 780657. 20434.6   2
  -4   6   0 22090.1 1010.23   2
  -4  -6   0 22014.8 1636.86   2
  -4  -6  -1 262281. 6563.10   1
  -4  -6  -1 257934. 8021.65   2
  -4   6  -1 247980. 6397.18   2
   4   6   2 9848.13 733.011   1
  -4  -6  -2 9848.08 1151.94   2
  -4  -6  -2 9197.63 704.338   1
   4   6   3 6002.47 673.788   1
  -4  -6  -3 5448.16 639.895   1
  -4  -6  -3 5858.83 928.745   2
  -4  -6  -4 30882.7 1758.31   1
   4   6   4 28759.5 1703.74   1
   4   6   4 30899.5 2225.52   2
   4  -6   5 456.478 117.357   2
  -4  -6  -5 368.074 306.288   1
   4   6   5 263.432 321.868   1
   4   6   5 234.085 430.261   2
   4  -6   6 1073.85 216.915   2
   4   6   6 2553.33 794.548   2
  -4  -6  -6 1944.60 576.795   1
   4   6   6 844.588 486.479   1
   4  -6   7-51.8970 166.242   2
  -4  -6  -7-439.970 424.691   1
   4   6   7 292.901 581.805   2
   4   6   7 675.622 492.970   1
   4   6   8 737.821 545.432   1
  -4  -6  -8 2343.45 691.103   1
   4  -6   8 1859.57 379.823   2
   4   6   8 2574.99 886.306   2
   4   6   9 18824.0 1909.06   1
   4   6   9 15934.3 1938.68   2
   4  -6   9 17922.4 1197.97   2
   4   6  10 957.724 724.352   1
   4  -6  10 1934.79 435.550   2
   4   6  10 1956.60 975.677   2
   4   6  11 56120.9 3726.67   1
   4   6  11 64237.4 4176.41   2
   4   6  12-533.026 665.098   1
   4   6  12-96.6755 892.574   2
   4   6  13 59185.3 4303.23   2
   4   6  13 54135.8 3965.94   1
  -4   7  16 26238.1 2921.92   1
  -4   7  15 18971.5 2446.44   1
  -4   7  14 11672.3 1843.66   1
  -4   7  13 87949.1 5002.61   1
  -4   7  12 1020.84 786.832   1
  -4  -7  12 800.840 818.518   1
  -4   7  11 153654. 6581.64   1
  -4  -7  11 147351. 6174.52   1
   4   7 -10 4417.48 831.388   1
  -4  -7  10 5260.34 928.541   2
  -4   7  10 5043.99 1138.72   1
  -4   7   9 79181.9 4146.37   1
  -4  -7   9 85766.1 3925.87   2
   4   7  -9 81414.6 3677.92   1
  -4  -7   8 15655.4 1476.67   2
   4   7  -8 16518.7 1406.03   1
  -4   7   8 16463.8 1697.59   1
  -4  -7   7 102808. 4249.60   2
   4   7  -7 101905. 3811.59   1
  -4   7   7 99081.6 4467.88   1
  -4  -7   6 2437.69 619.608   2
   4   7  -6 1579.72 571.090   2
   4   7  -6 2246.84 496.748   1
  -4  -7   5 210083. 6928.94   2
   4   7  -5 208691. 6907.42   2
   4   7  -5 212952. 5993.59   1
  -4  -7   4 12179.8 1244.80   2
   4   7  -4 12406.7 1259.61   2
   4   7  -4 12451.7 752.290   1
   4   7  -3 20241.4 1579.74   2
   4   7  -3 17935.4 714.013   1
  -4  -7   3 18778.5 1515.85   2
   4   7  -2 3943.02 824.678   2
  -4  -7   2 6428.90 937.811   2
  -4  -7   1 127904. 4839.93   2
  -4   7   0 120228. 3472.83   2
  -4  -7   0 122944. 4711.07   2
   4   7   1 195698. 5216.63   1
  -4  -7  -1 206155. 6795.30   2
   4   7   2 32455.0 1482.82   1
  -4  -7  -2 35924.2 1503.49   1
  -4  -7  -2 32999.4 2228.15   2
   4   7   3 39302.5 1819.26   1
  -4  -7  -3 35632.1 2379.56   2
  -4  -7  -3 36864.5 1777.21   1
  -4  -7  -4 5723.95 742.483   1
   4   7   4 6082.76 756.302   1
   4   7   4 6274.22 1129.36   2
  -4  -7  -5 1816.96 480.044   1
   4   7   5 1989.00 532.255   1
   4   7   5 2532.45 770.836   2
  -4  -7  -6 2165.23 555.436   1
   4   7   6 3865.99 738.242   1
   4   7   6 2178.30 773.199   2
   4   7   7 37898.4 2483.54   1
  -4  -7  -7 42880.4 2627.64   1
   4   7   7 40442.2 2958.94   2
   4  -7   8 3909.02 391.437   2
  -4  -7  -8 3985.58 864.146   1
   4   7   8 3339.40 799.683   1
   4   7   8 3818.74 1149.46   2
   4   7   9 73319.7 4394.10   2
   4   7   9 73833.0 3985.85   1
   4  -7   9 72300.4 2536.63   2
   4   7  10 341.684 602.413   1
   4   7  10 1180.80 765.163   2
   4   7  11 27795.1 2790.00   2
   4   7  11 24199.8 2424.46   1
   4   7  12-2630.26 950.701   1
   4   7  12 518.810 878.163   2
   4   7  13 947.373 669.078   1
   4   7  13 149.599 899.446   2
  -4   8  16 874.741 832.604   1
  -4   8  15 31709.8 3120.05   1
  -4   8  14-458.890 709.938   1
  -4   8  13 16430.8 2103.58   1
  -4   8  12 713.537 834.395   1
  -4   8  11 5484.19 1194.30   1
  -4  -8  10 2781.05 695.058   2
  -4   8  10 1764.10 816.704   1
   4   8 -10 863.073 475.785   1
   4   8  -9 762.660 456.717   1
  -4  -8   9 1671.39 553.978   2
  -4   8   9 739.531 594.638   1
  -4   8   8 11116.6 1456.41   1
   4   8  -8 12517.2 1228.68   1
  -4  -8   7 19654.2 1654.33   2
  -4   8   7 19650.8 1826.53   1
   4   8  -7 19487.0 1416.35   1
  -4  -8   6 46984.6 2633.94   2
  -4   8   6 41411.0 2723.74   1
   4   8  -6 47430.2 2631.97   2
   4   8  -6 47953.5 2171.70   1
   4   8  -5 71927.0 3385.62   2
   4   8  -5 74048.9 2687.09   1
  -4   8   5 74632.7 3665.12   1
  -4  -8   5 72395.0 3403.22   2
   4   8  -4 92258.4 3947.28   2
   4   8  -4 92611.3 2909.58   1
  -4  -8   4 94700.9 3976.32   2
   4   8  -3 88317.5 3857.51   2
   4   8  -3 91172.5 2572.61   1
  -4  -8   3 89449.3 3878.92   2
  -4  -8   2 134916. 5047.71   2
   4   8  -2 129568. 5012.42   2
   4   8  -1 66245.5 3287.78   2
  -4  -8   1 71591.1 3355.62   2
  -4   8   0 178305. 4861.44   2
  -4  -8   0 179504. 6304.15   2
   4   8   0 179366. 6363.94   2
   4   8   1 41819.6 1521.68   1
  -4  -8  -1 45218.3 2650.48   2
   4   8   1 45443.2 2689.98   2
   4   8   2 200148. 5554.40   1
  -4  -8  -2 190067. 6892.53   2
   4   8   2 190564. 6969.61   2
   4   8   3 10365.6 1376.52   2
   4   8   3 7347.21 771.650   1
  -4  -8  -3 8968.92 805.340   1
   4   8   4 101005. 4704.23   2
  -4  -8  -4 103264. 3755.71   1
   4   8   4 99754.0 3737.54   1
  -4  -8  -5 768.112 337.485   1
   4   8   5 2258.22 814.218   2
   4   8   5 1749.77 505.602   1
   4   8   6 891.059 471.149   1
  -4  -8  -6 956.945 405.754   1
   4   8   6 618.457 610.819   2
  -4  -8  -7 1975.14 631.943   1
   4   8   7 1517.41 629.730   1
   4   8   7 1519.44 789.019   2
   4   8   8 42030.0 3183.09   2
   4   8   8 36545.1 2559.49   1
   4   8   9 27226.6 2342.39   1
   4   8   9 33431.0 2938.20   2
   4   8  10 29647.3 2545.32   1
   4   8  10 32931.2 3005.19   2
   4   8  11 24423.1 2401.29   1
   4   8  11 27112.0 2874.10   2
   4   8  12 21018.0 2570.09   2
   4   8  12 18813.7 2195.53   1
  -4   9  15 115.196 539.954   1
  -4   9  14 41125.0 3565.82   1
  -4   9  13 20922.6 2393.83   1
  -4   9  12 33350.3 2938.78   1
  -4   9  11 33598.1 2846.88   1
  -4   9  10 41008.8 3076.44   1
   4   9 -10 42140.3 2643.73   1
  -4   9   9 40631.6 2956.27   1
  -4  -9   9 39267.1 2552.68   2
   4   9  -9 39093.2 2413.94   1
  -4   9   8 9303.02 1393.95   1
  -4  -9   8 9427.56 1180.21   2
   4   9  -8 10858.2 1145.49   1
  -4  -9   7 34863.3 2285.72   2
   4   9  -7 31442.1 2157.76   2
   4   9  -7 30751.3 1879.35   1
  -4   9   7 33165.1 2486.61   1
  -4  -9   6 8938.96 1128.24   2
   4   9  -6 8283.11 1102.69   2
   4   9  -6 9232.85 912.262   1
  -4   9   6 10103.5 1367.67   1
   4   9  -5 31157.7 2135.51   2
  -4  -9   5 33365.1 2186.84   2
  -4   9   5 32062.7 2333.27   1
   4   9  -5 32634.7 1608.20   1
  -4  -9   4 1800.33 537.508   2
   4   9  -4 1555.00 592.604   2
   4   9  -4 3046.88 421.831   1
  -4  -9   3 6177.33 893.363   2
   4   9  -3 8640.03 1091.45   2
   4   9  -3 8353.02 545.957   1
   4   9  -2 402.701 421.458   2
  -4  -9   2 290.777 321.292   2
   4   9  -1 33580.5 2283.10   2
  -4  -9   1 36623.6 2333.09   2
   4   9   0 4642.42 922.580   2
  -4   9   0 5717.51 511.101   2
   4   9   0 4254.28 331.314   1
  -4  -9   0 5126.25 865.578   2
   4   9   1 163663. 4501.43   1
  -4  -9  -1 162681. 6112.11   2
   4   9   1 160410. 6134.63   2
   4   9   2 15604.9 982.755   1
   4   9   2 13945.1 1602.55   2
   4   9   3 102010. 3555.22   1
   4   9   3 106887. 4849.52   2
   4   9   4 43680.2 2179.50   1
  -4  -9  -4 45479.1 2215.82   1
   4   9   4 46066.5 3077.73   2
   4   9   5 163419. 5680.20   1
  -4  -9  -5 174355. 5764.62   1
   4   9   5 171188. 6988.63   2
   4   9   6 60645.5 3080.50   1
  -4  -9  -6 64012.4 3132.78   1
   4   9   6 67564.9 4009.54   2
   4   9   7 116120. 5725.63   2
   4   9   7 113180. 4796.68   1
  -4  -9  -7 121820. 4931.03   1
   4   9   8 39792.2 3234.08   2
   4   9   8 41003.4 2713.68   1
   4   9   9 47036.0 3606.27   2
   4   9   9 42425.2 2921.43   1
   4   9  10 8211.80 1394.09   1
   4   9  10 9060.27 1657.13   2
   4   9  11 11344.4 1703.28   1
   4   9  11 13644.0 2124.60   2
   4   9  12 4451.68 1159.30   1
   4   9  12 7584.52 1718.80   2
  -4  10  15 9785.19 1833.27   1
  -4  10  14 3046.14 1166.57   1
  -4  10  13 4316.72 1153.95   1
  -4  10  12 1284.45 797.648   1
  -4  10  11 3280.62 1044.94   1
   4  10 -10-1215.63 622.252   1
  -4  10  10 523.619 663.129   1
   4  10  -9 5036.73 920.961   1
  -4  10   9 5273.68 1180.43   1
  -4 -10   8 6560.20 1036.93   2
   4  10  -8 7255.65 971.204   1
  -4  10   8 6504.39 1244.32   1
  -4  10   7 25164.8 2217.81   1
   4  10  -7 24784.3 1952.81   2
   4  10  -7 25045.1 1696.20   1
  -4 -10   7 30134.9 2150.40   2
  -4 -10   6 71787.4 3510.76   2
   4  10  -6 67531.6 3416.95   2
   4  10  -6 67675.6 2870.36   1
  -4  10   6 71098.9 3825.01   1
  -4 -10   5 9396.80 1176.81   2
   4  10  -5 6424.39 1002.19   2
  -4  10   5 6028.27 1109.31   1
   4  10  -5 8271.43 793.827   1
   4  10  -4 5318.46 878.172   2
   4  10  -4 5690.34 573.814   1
  -4 -10   4 4075.66 768.803   2
   4  10  -3 3980.12 411.794   1
   4  10  -3 4268.99 812.995   2
  -4 -10   3 4891.38 875.777   2
   4  10  -2 339.952 143.350   1
   4  10  -2 408.978 418.757   2
   4  10  -2 255.960 129.262   1
  -4 -10   2 629.367 440.393   2
   4  10  -1 3561.13 309.764   1
   4  10  -1 2394.76 672.404   2
   4  10  -1 3156.59 282.643   1
  -4 -10   1 4016.21 820.143   2
   4  10   0 14742.8 735.239   1
  -4  10   0 16290.1 884.307   2
   4  10   0 13512.1 1506.60   2
   4  10   1 97.6348 164.735   1
   4  10   1 591.312 609.036   2
   4  10   2 135548. 5718.24   2
   4  10   2 136243. 4176.74   1
   4  10   3 682.856 672.631   2
   4  10   3 432.898 304.084   1
   4  10   4 64719.1 2787.55   1
   4  10   4 62875.3 3802.53   2
   4  10   5 787.589 446.780   1
  -4 -10  -5 313.510 378.997   1
   4  10   6 11564.3 1291.98   1
  -4 -10  -6 11594.5 1270.88   1
   4  10   6 12746.0 1776.84   2
  -4 -10  -7 34.0518 399.901   1
   4  10   7 795.045 573.948   1
   4  10   7 717.312 789.033   2
   4  10   8 52738.4 3848.63   2
   4  10   8 51125.2 3070.42   1
   4  10   9 984.670 638.050   1
   4  10   9 2122.05 1032.35   2
   4  10  10 31151.8 2557.53   1
   4  10  10 24848.5 2766.85   2
   4  10  11 9868.74 1823.56   2
   4  10  11 6829.38 1302.99   1
  -4  11  14 9921.96 1804.25   1
  -4  11  13 791.630 772.246   1
  -4  11  12 12781.4 1947.70   1
  -4  11  11 1636.86 931.311   1
  -4  11  10 48652.4 3505.69   1
   4  11  -9 8441.87 1127.72   1
  -4  11   9 7032.88 1427.86   1
  -4  11   8 111015. 5462.80   1
   4  11  -8 122937. 4696.13   1
  -4 -11   7 23687.6 1931.33   2
  -4  11   7 22253.3 2159.94   1
   4  11  -7 19541.6 1752.48   2
   4  11  -7 20269.5 1549.30   1
  -4  11   6 78620.2 4213.37   1
   4  11  -6 84576.2 3302.14   1
   4  11  -6 80930.5 3881.18   2
  -4 -11   6 77793.6 3836.23   2
   4  11  -5 270.431 526.287   2
   4  11  -5 385.034 316.330   1
  -4 -11   5 125.434 243.017   2
  -4  11   5 634.263 625.282   1
   4  11  -4 4544.37 572.613   1
   4  11  -4 3595.19 823.890   2
  -4  11   4 2789.76 832.964   1
  -4 -11   4 3703.32 773.507   2
  -4 -11   3 94.2913 393.215   2
   4  11  -3-465.957 448.036   2
   4  11  -3-33.8337 136.248   1
   4  11  -2 5331.01 466.768   1
   4  11  -2 3778.00 851.823   2
   4  11  -2 4813.55 440.513   1
   4  11  -1 1134.81 592.297   2
   4  11  -1 801.980 203.827   1
  -4  11   1 518.052 249.392   2
   4  11   0 10861.2 1417.15   2
   4  11   0 11952.5 705.899   1
  -4  11   0 11516.6 767.808   2
   4  11   1 4140.16 981.847   2
   4  11   1 3710.95 445.702   1
   4  11   2 66059.4 2473.86   1
   4  11   2 62203.2 3699.56   2
   4  11   3 2758.78 990.366   2
   4  11   3 3418.66 567.348   1
   4  11   4 216447. 8284.40   2
   4  11   4 207492. 6498.86   1
   4  11   5 35342.6 2118.34   1
   4  11   5 40023.9 3146.13   2
   4  11   6 317084. 9824.05   1
   4  11   6 340071. 11680.7   2
   4  11   7 18064.5 2234.24   2
   4  11   7 15930.0 1572.80   1
   4  11   8 117386. 5145.71   1
   4  11   8 125985. 6395.17   2
   4  11   9 2462.76 793.388   1
   4  11   9 3149.68 1168.86   2
   4  11  10 31565.8 3206.82   2
   4  11  10 28596.1 2493.51   1
   4  11  11 4.31022 542.699   1
   4  11  11 521.232 864.230   2
  -4  12  13 7340.43 1656.80   1
  -4  12  12 576.329 815.088   1
  -4  12  11-225.947 623.075   1
  -4  12  10 453.310 740.659   1
  -4  12   9 803.333 773.262   1
   4  12  -9 1327.27 610.163   1
   4  12  -8 20326.9 1692.52   1
  -4  12   8 21336.8 2210.27   1
  -4  12   7 1623.81 790.208   1
   4  12  -7 472.848 342.039   1
   4  12  -7 538.179 509.729   2
   4  12  -6 59313.7 2702.96   1
   4  12  -6 59378.3 3290.45   2
  -4  12   6 60029.4 3658.88   1
  -4  12   5 503.267 649.750   1
   4  12  -5 551.675 500.803   2
   4  12  -5 325.951 256.488   1
   4  12  -4 13901.9 1520.39   2
   4  12  -4 16987.2 1110.24   1
  -4  12   4 12199.5 1554.27   1
   4  12  -3 516.982 540.077   2
  -4  12   3 647.595 396.363   2
   4  12  -3 456.969 234.029   1
   4  12  -2 11600.0 1427.40   2
   4  12  -2 11479.7 773.532   1
  -4  12   2 11144.8 1066.00   2
   4  12  -2 11443.7 766.673   1
   4  12  -1 1211.48 524.149   2
   4  12  -1 1169.01 272.822   1
  -4  12   1 2036.34 433.890   2
   4  12   0 51082.1 3238.86   2
   4  12   0 52020.4 1929.40   1
  -4  12   0 54429.2 2022.89   2
   4  12   1 58527.7 2188.93   1
   4  12   1 56663.8 3520.60   2
   4  12   2 77945.7 2863.82   1
   4  12   2 79246.7 4346.86   2
   4  12   3 31705.1 1716.49   1
   4  12   3 30359.3 2630.00   2
   4  12   4 11022.2 1726.66   2
   4  12   4 11976.6 1094.95   1
   4  12   5 4708.83 772.418   1
   4  12   5 7038.40 1374.68   2
   4  12   6 4959.60 907.893   1
   4  12   6 6257.61 1413.17   2
   4  12   7 1650.15 898.984   2
   4  12   7-2311.00 743.186   1
   4  12   8 19118.1 2371.97   2
   4  12   8 16351.1 1677.75   1
   4  12   9 517.912 546.461   1
   4  12   9 1368.15 902.583   2
   4  12  10 36541.4 3487.22   2
   4  12  10 35318.7 2775.39   1
  -4  13  12 43155.0 3649.53   1
  -4  13  11 4654.46 1382.83   1
  -4  13  10 53911.6 3889.06   1
  -4  13   9 16595.3 2085.37   1
  -4  13   8 63864.8 4066.43   1
   4  13  -7 36427.1 2524.36   2
  -4  13   7 31890.6 2773.58   1
   4  13  -6 53630.8 2583.06   1
   4  13  -6 51133.0 3122.66   2
  -4  13   6 52499.9 3538.21   1
   4  13  -5 47210.8 2226.62   1
   4  13  -5 46470.9 2920.78   2
   4  13  -4 6463.44 1123.44   2
   4  13  -4 6937.79 751.407   1
  -4  13   4 8425.75 1129.50   2
  -4  13   4 5964.57 1229.56   1
   4  13  -3 428.432 254.980   1
   4  13  -3-87.0208 608.117   2
   4  13  -3 582.893 228.522   1
  -4  13   3-286.194 363.842   2
   4  13  -2 1328.15 328.103   1
   4  13  -2 1310.50 329.261   1
   4  13  -2 920.548 601.461   2
  -4  13   2 1517.46 494.023   2
   4  13  -1 37380.1 2746.21   2
   4  13  -1 37243.6 1594.18   1
  -4  13   1 40151.0 1945.84   2
   4  13   0 7197.68 1281.52   2
   4  13   0 8389.66 704.951   1
  -4  13   0 10331.5 775.963   2
   4  13   1 79510.2 2790.94   1
   4  13   1 77094.1 4322.30   2
   4  13   2 53742.3 3622.65   2
   4  13   2 53636.4 2270.85   1
   4  13   3 22586.7 1449.54   1
   4  13   3 24996.4 2453.89   2
   4  13   4 106805. 5646.57   2
   4  13   4 112660. 4159.33   1
   4  13   5 7383.82 1519.41   2
   4  13   5 9580.23 1082.62   1
   4  13   6 93722.3 4032.24   1
   4  13   6 87828.1 5287.65   2
   4  13   7 11406.8 1318.18   1
   4  13   7 9865.66 1702.69   2
   4  13   8 39987.6 2708.29   1
   4  13   8 37415.6 3462.34   2
   4  13   9 16147.0 2340.10   2
  -4  14  11 1727.71 1051.57   1
  -4  14  10 92.2253 618.842   1
  -4  14   9 224.129 658.461   1
  -4  14   8 15174.5 1995.26   1
  -4  14   7 2194.37 912.682   1
   4  14  -7 1902.52 664.153   2
   4  14  -6 52658.3 3293.13   2
  -4  14   6 58438.0 3618.28   2
  -4  14   6 62847.1 3919.41   1
   4  14  -5 2511.19 801.365   2
  -4  14   5 2550.34 702.723   2
  -4  14   5 3015.88 1078.89   1
   4  14  -4 100639. 4790.33   2
  -4  14   4 100161. 5124.43   1
  -4  14   4 101693. 4492.38   2
   4  14  -3 18275.2 1876.54   2
   4  14  -3 18016.2 1159.13   1
  -4  14   3 20750.5 1670.71   2
   4  14  -2 94169.8 4708.47   2
  -4  14   2 97091.7 3866.86   2
   4  14  -2 98671.5 3269.47   1
   4  14  -1 25195.9 1324.13   1
   4  14  -1 24900.3 2297.35   2
  -4  14   1 30259.1 1679.11   2
   4  14   0 124550. 5817.20   2
   4  14   0 129277. 4021.83   1
  -4  14   0 130024. 3995.87   2
   4  14   1 2666.76 897.384   2
   4  14   1 1268.60 354.391   1
   4  14   2 88849.1 3240.17   1
   4  14   2 83855.5 4801.42   2
   4  14   3 7284.98 1414.64   2
   4  14   3 6760.74 778.832   1
   4  14   4 11376.4 1788.71   2
   4  14   4 11003.4 1080.16   1
   4  14   5 2781.26 989.761   2
   4  14   6 1442.27 836.848   2
   4  14   7 1081.77 954.150   2
   4  14   8 7203.86 1620.64   2
  -4  15  10 22135.2 2548.70   1
  -4  15  10 19386.4 2534.17   2
  -4  15   9 26447.6 2761.45   2
  -4  15   9 25716.8 2715.55   1
  -4  15   8 11614.3 1825.66   1
  -4  15   8 17163.9 2181.38   2
   4  15  -7 24021.9 2117.72   2
  -4  15   7 22557.4 2320.96   2
  -4  15   7 23699.7 2483.62   1
  -4  15   6 14111.1 1936.17   1
   4  15  -6 14448.0 1690.98   2
  -4  15   6 16112.6 1876.13   2
   4  15  -5 30633.6 2465.86   2
  -4  15   5 31621.4 2463.60   2
  -4  15   5 33196.4 2849.66   1
   4  15  -4 4834.34 1035.04   2
  -4  15   4 3366.44 970.853   1
  -4  15   4 3006.82 769.678   2
   4  15  -3 3257.46 940.635   2
  -4  15   3 2568.40 700.680   2
   4  15  -2-152.454 603.035   2
  -4  15   2 338.938 362.123   2
   4  15  -1 25762.2 2420.19   2
  -4  15   1 28418.1 1666.84   2
   4  15   0 5719.06 1205.24   2
   4  15   1 73588.7 4401.04   2
   4  15   2 5055.04 1237.28   2
   4  15   3 36213.3 3140.75   2
   4  15   4-1316.13 982.849   2
   4  15   5 1629.51 1019.72   2
   4  15   6-2507.76 1146.23   2
   4  15   7 6360.57 1547.36   2
  -4  16   9 3975.57 1156.34   1
  -4  16   9 4275.68 1229.04   2
  -4  16   8 2715.52 1032.54   1
  -4  16   8 1666.71 750.498   2
   4  16  -7 35514.2 2671.95   2
  -4  16   7 43781.1 3299.39   2
  -4  16   7 36825.0 3203.44   1
  -4  16   6 14060.7 1987.65   1
   4  16  -6 19702.7 2040.92   2
  -4  16   6 17032.6 1948.11   2
   4  16  -5 80079.7 4338.36   2
  -4  16   5 84177.5 4290.31   2
  -4  16   5 80909.6 4797.35   1
   4  16  -4 39142.3 2910.03   2
  -4  16   4 39941.2 2652.61   2
  -4  16   4 35573.2 3074.08   1
   4  16  -3 135811. 6122.12   2
  -4  16   3 136558. 6483.35   1
  -4  16   3 144361. 5461.38   2
   4  16  -2 86315.8 4699.62   2
   4  16  -1 129396. 6086.17   2
   4  16   0 48277.7 3532.52   2
   4  16   1 41122.2 3302.63   2
   4  16   2 3141.53 1146.12   2
   4  16   3-510.620 717.726   2
   4  16   4-1139.19 806.859   2
   4  16   5-1117.93 836.051   2
  -4  17   7 16897.6 2213.96   1
   4  17  -7 17526.3 1892.81   2
  -4  17   7 17320.7 2094.59   2
  -4  17   6 3552.05 1103.33   1
   4  17  -6 5325.76 1129.48   2
  -4  17   6 6524.20 1263.46   2
   4  17  -5 12937.1 1667.57   2
  -4  17   5 14949.7 1705.36   2
  -4  17   5 13622.1 1950.85   1
   4  17  -4 1498.75 731.284   2
  -4  17   4 1660.40 852.172   1
   4  17  -3 5610.68 1148.42   2
  -4  17   3 2083.43 936.678   1
   4  17  -2 8580.52 1494.77   2
   4  17  -1 6658.30 1375.30   2
   4  17   0 16853.8 2085.62   2
   4  17   1 15892.4 2059.48   2
   4  17   2 9204.63 1600.19   2
   4  17   3 2403.74 936.114   2
   4  18  -3 69190.0 4202.92   2
  -4  18   3 64739.3 4373.16   1
   4  18  -2-782.620 599.910   2
  -4  18   2 96.6733 790.749   1
   4  18  -1 119956. 6049.17   2
  -5   0  17 124868. 6745.08   1
  -5   0  16-2034.62 1066.01   1
  -5   0  15 33016.9 3006.17   1
  -5   0  14-114.565 656.951   1
  -5   0  13-1078.56 654.155   1
  -5   0  12-108.205 607.285   1
  -5   0  11 534.946 424.692   1
   5   0 -10 158.051 475.922   1
  -5   0  10 193.127 480.976   1
  -5   0   9 57594.4 3095.69   1
   5   0  -9 62431.2 3117.21   1
  -5   0   8 409.088 438.802   1
   5   0  -8 1091.45 496.294   1
  -5   0   7 163597. 5553.65   1
  -5   0   7 160383. 5696.51   2
   5   0  -7 157881. 5444.55   1
  -5   0   6 940.903 475.769   1
  -5   0   6 1864.34 589.297   2
   5   0  -6 1218.13 484.152   1
  -5   0   5 215378. 6790.47   2
  -5   0   5 213308. 6480.94   1
  -5   0   4 628.772 371.775   2
  -5   0   4 446.157 345.912   1
  -5   0   3 133484. 4589.47   2
  -5   0   2 51.1717 248.141   2
   5   0  -2 42.2682 292.814   2
  -5   0   1 54755.9 2509.79   2
   5   0  -1 68540.7 2725.92   2
  -5   0   0-148.751 326.923   2
   5   0   0-57.1438 373.194   2
   5   0   1 116273. 4043.48   2
  -5   0  -1 111287. 3989.31   2
   5   0   2 1739.49 548.711   2
  -5   0  -2 2488.11 562.673   2
  -5   0  -3 108332. 3953.81   2
  -5   0  -3 100843. 4051.93   1
   5   0   3 106177. 3962.00   2
   5   0   4 2314.95 679.363   2
  -5   0  -4 1834.35 686.892   1
  -5   0  -5 8421.52 1134.62   1
   5   0   5 11752.9 1235.22   2
  -5   0  -6 548.039 590.410   1
   5   0   6-27.2592 551.799   2
   5   0   7 81345.8 3722.41   2
   5   0   8 13.5883 533.749   2
   5   0   9 83809.8 4051.07   2
   5   0  10 110.288 492.488   2
   5   0  11 12656.3 1582.72   2
   5   0  12 570.395 577.342   2
   5   0  13 5253.00 1145.82   2
  -5   1  17 3117.03 1242.99   1
  -5  -1  17 2912.48 1151.94   1
  -5  -1  16 11101.0 1937.10   1
  -5   1  16 10823.5 1784.22   1
  -5  -1  15 11757.2 1784.66   1
  -5   1  15 9645.70 1682.16   1
  -5  -1  14-257.288 691.125   1
  -5   1  14-471.502 835.092   1
  -5  -1  13 16432.8 1906.67   1
  -5   1  13 14809.3 1872.32   1
  -5   1  12 4875.04 1049.72   1
  -5  -1  12 5831.39 1132.20   1
  -5   1  11 3809.62 950.495   1
  -5  -1  11 5016.40 1017.61   1
   5  -1 -10 1141.31 495.734   1
   5   1 -10 1249.49 503.145   1
  -5  -1  10 1098.52 604.591   1
  -5   1  10 1658.78 699.348   1
  -5   1   9 43746.8 2669.54   1
  -5  -1   9 45061.4 2630.41   1
  -5  -1   9 39504.7 2564.71   2
   5  -1  -9 46994.3 2675.08   1
   5   1  -9 46635.8 2588.87   1
   5   1  -8 1026.75 501.411   1
  -5  -1   8 413.663 522.656   1
  -5   1   8 498.718 555.700   1
  -5  -1   8 308.923 371.597   2
   5  -1  -8 59.2505 349.439   1
  -5   1   7 174463. 6010.71   1
  -5  -1   7 177129. 5879.58   1
  -5  -1   7 176112. 6112.89   2
   5  -1  -7 190726. 6086.34   1
   5   1  -7 167966. 5720.40   1
  -5  -1   6 8197.56 910.208   1
  -5   1   6 7162.77 929.645   1
  -5  -1   6 8098.71 1015.45   2
  -5   1   6 8996.08 1031.61   2
   5   1  -6 6572.37 790.076   1
  -5  -1   5 113434. 3997.89   1
  -5  -1   5 122733. 4450.27   2
  -5   1   5 125883. 4412.15   2
  -5   1   5 112614. 4165.91   1
  -5  -1   4 13539.8 1212.61   2
  -5   1   4 14145.2 1184.94   2
  -5  -1   4 13289.2 997.499   1
  -5   1   4 12796.5 1108.14   1
  -5  -1   3 2951.24 560.688   2
  -5   1   3 3917.38 612.624   2
  -5  -1   3 3957.98 526.687   1
  -5  -1   2 12440.2 1110.74   2
  -5   1   2 13141.3 1065.60   2
   5  -1  -2 13073.4 1093.73   2
  -5  -1   1 11219.1 1027.60   2
  -5   1   1 10249.6 929.066   2
   5   1  -1 11762.6 1073.86   2
   5  -1  -1 9770.63 916.948   2
  -5  -1   0 1928.08 512.731   2
  -5   1   0 739.512 360.910   2
   5   1   0 1337.12 464.577   2
   5  -1   0 1570.35 419.303   2
   5   1   1 114567. 4122.99   2
   5  -1   1 114640. 3896.21   2
  -5  -1  -1 110867. 4059.55   2
  -5   1  -1 106441. 3811.26   2
   5  -1   2 106705. 3824.13   2
  -5  -1  -2 113559. 4096.09   2
  -5   1  -2 108881. 3822.87   2
  -5  -1  -2 105282. 3910.94   1
   5   1   2 111792. 4108.17   2
  -5  -1  -3 517304. 14061.7   1
  -5   1  -3 497610. 13657.0   2
  -5  -1  -3 510699. 14031.4   2
   5   1   3 534511. 14141.1   2
   5  -1   3 525060. 13767.4   2
  -5   1  -4 122117. 4773.79   1
  -5  -1  -4 121640. 4646.07   1
   5   1   4 114510. 4506.23   2
   5  -1   4 125865. 4374.96   2
  -5   1  -5 576738. 15596.7   1
  -5  -1  -5 549407. 15251.8   1
   5   1   5 568120. 15144.5   2
  -5  -1  -6 60580.0 3227.13   1
  -5   1  -6 57183.0 3255.90   1
   5   1   6 55579.8 2987.68   2
   5  -1   6 58563.0 2845.43   2
   5  -1   7 209670. 7036.34   2
   5   1   7 218932. 7382.51   2
   5   1   8 28123.4 2207.88   2
   5  -1   8 29634.8 2077.83   2
   5  -1   9 27427.1 2089.59   2
   5   1   9 26836.7 2205.82   2
   5  -1  10 9145.85 1274.89   2
   5   1  10 12171.4 1512.64   2
   5   1  11 7804.15 1293.50   2
   5  -1  11 8598.47 1281.00   2
   5   1  12 6971.27 1336.99   2
   5  -1  12 6838.14 1187.28   2
   5   1  13 1960.58 902.806   2
   5  -1  13 1725.46 807.545   2
  -5   2  17 26031.3 2941.67   1
  -5  -2  17 28628.4 3120.37   1
  -5   2  16 56452.5 4241.53   1
  -5  -2  16 60969.2 4311.15   1
  -5  -2  15-284.213 757.355   1
  -5   2  15-875.359 821.316   1
  -5  -2  14 24339.9 2439.93   1
  -5   2  14 25204.8 2555.29   1
  -5  -2  13 1279.91 807.208   1
  -5   2  13 1780.18 937.615   1
  -5   2  12 5754.96 1192.28   1
  -5  -2  12 5898.00 1164.27   1
  -5  -2  11 19321.5 1886.03   1
  -5   2  11 21895.0 2043.97   1
  -5   2  10 37405.9 2595.46   1
  -5  -2  10 35917.2 2472.94   1
   5   2 -10 44600.4 2595.73   1
  -5   2   9 39613.8 2592.26   1
  -5  -2   9 43011.3 2629.06   2
  -5  -2   9 41486.0 2533.99   1
   5  -2  -9 41185.9 2565.96   1
   5   2  -9 41420.1 2408.22   1
  -5   2   8 125549. 4896.15   1
  -5  -2   8 127959. 4921.73   2
  -5  -2   8 120815. 4614.28   1
   5  -2  -8 122870. 4807.71   1
   5   2  -8 112189. 4419.02   1
  -5   2   7 27879.5 1965.52   1
  -5  -2   7 29954.1 2030.22   2
  -5  -2   7 31399.7 1883.37   1
   5  -2  -7 33512.6 2067.64   1
   5   2  -7 32380.9 1835.69   1
  -5  -2   6 103244. 4094.32   2
  -5  -2   6 101623. 3686.52   1
   5   2  -6 109320. 3688.83   1
  -5  -2   5 321771. 8611.37   1
  -5  -2   5 320030. 9267.52   2
  -5   2   5 307028. 9035.49   2
   5   2  -5 305846. 8477.52   1
  -5   2   5 294070. 8982.38   1
  -5  -2   4 45022.0 2335.59   2
  -5   2   4 44979.2 2215.44   2
  -5   2   4 45692.8 2261.58   1
  -5  -2   4 41877.2 1847.35   1
  -5  -2   3 383134. 10910.7   2
  -5   2   3 395524. 10698.6   2
  -5  -2   3 387930. 10073.8   1
  -5  -2   2 59670.3 2747.19   2
  -5   2   2 63006.6 2563.31   2
  -5   2   1 94858.8 3330.56   2
   5  -2  -1 95058.0 3376.52   2
  -5  -2   1 90177.7 3607.55   2
  -5  -2   0 3094.55 617.949   2
  -5   2   0 3039.26 483.589   2
   5  -2   0 3779.35 580.590   2
   5   2   1 110882. 4161.75   2
   5  -2   1 107175. 3689.14   2
  -5  -2  -1 107614. 4104.67   2
  -5   2  -1 107051. 3663.26   2
  -5  -2  -1 112387. 3693.86   1
   5  -2   2 12172.2 989.010   2
  -5  -2  -2 13662.0 1100.69   1
  -5   2  -2 14082.7 1039.93   2
  -5  -2  -2 10778.5 1117.48   2
   5   2   2 14171.5 1289.12   2
   5  -2   3 184351. 5787.39   2
  -5  -2  -3 193268. 6161.12   1
  -5   2  -3 199902. 5857.57   2
  -5  -2  -3 193360. 6368.92   2
   5   2   3 187904. 6347.86   2
   5   2   4 7105.73 1024.71   2
  -5   2  -4 6532.13 989.159   1
  -5  -2  -4 6597.80 898.551   1
  -5  -2  -4 8273.08 1022.57   2
   5  -2   4 8570.32 876.959   2
  -5  -2  -5 32216.4 2155.89   1
  -5   2  -5 31980.4 2297.91   1
   5   2   5 37344.0 2353.06   2
   5  -2   5 33516.1 1891.59   2
   5  -2   6 874.592 428.722   2
   5   2   6 604.247 531.749   2
  -5  -2  -6 289.058 386.517   1
   5   2   7 55651.1 3170.26   2
   5  -2   7 57261.9 2826.79   2
  -5  -2  -7 60242.1 3351.47   1
   5   2   8 5239.31 1011.88   2
   5  -2   8 6431.92 941.862   2
   5   2   9 117517. 5303.08   2
   5  -2   9 122307. 4876.35   2
   5  -2  10 1169.21 616.254   2
   5   2  10 375.427 665.466   2
   5   2  11 38001.5 2950.98   2
   5  -2  11 40025.8 2669.83   2
   5   2  12 2501.94 950.351   2
   5  -2  12 2517.91 850.620   2
   5  -2  13 16894.8 1849.35   2
   5   2  13 14916.8 1983.21   2
  -5  -3  17 42907.6 3778.26   1
  -5   3  17 41365.4 3719.69   1
  -5  -3  16 4288.34 1385.56   1
  -5   3  16 5377.43 1497.24   1
  -5  -3  15 50281.2 3805.24   1
  -5   3  15 55660.3 3979.91   1
  -5   3  14 8446.56 1543.93   1
  -5  -3  14 8899.21 1579.15   1
  -5  -3  13 73831.0 4293.09   1
  -5   3  13 75905.2 4408.45   1
  -5  -3  12 80868.5 4304.01   1
  -5   3  12 86865.1 4583.87   1
  -5  -3  11 84821.7 4240.12   1
  -5   3  11 89678.2 4489.64   1
   5   3 -11 85000.1 4082.66   1
  -5  -3  10 57582.8 3212.71   1
  -5   3  10 60204.1 3456.17   1
   5   3 -10 59077.3 3100.37   1
  -5   3   9 88194.2 4170.71   1
  -5  -3   9 89438.2 4121.24   2
   5  -3  -9 97879.4 4259.50   1
  -5  -3   9 83098.0 3901.64   1
   5   3  -9 92661.1 3867.23   1
  -5   3   8 9115.94 1230.65   1
  -5  -3   8 8976.29 1122.35   2
   5  -3  -8 10527.8 1224.80   1
  -5  -3   8 8721.67 1067.72   1
   5   3  -8 10887.7 1086.74   1
  -5  -3   7 153073. 5643.11   2
  -5   3   7 149562. 5651.75   1
  -5  -3   7 167832. 5380.94   1
   5   3  -7 157419. 5175.46   1
   5   3  -6 3584.30 560.363   1
  -5  -3   6 4919.61 682.522   1
  -5  -3   6 5480.67 869.165   2
  -5  -3   5 19134.8 1524.68   2
  -5  -3   5 17981.9 1143.28   1
   5   3  -5 19297.2 1148.18   1
  -5  -3   4 2761.22 628.658   2
  -5  -3   4 1613.89 358.032   1
  -5   3   4 3069.74 594.768   2
  -5  -3   3 33821.6 2015.79   2
  -5   3   3 33460.8 1789.15   2
  -5  -3   3 34759.7 1392.35   1
  -5  -3   2 28282.6 1804.72   2
  -5   3   2 28211.8 1560.23   2
  -5  -3   2 29734.5 1184.82   1
  -5  -3   1 2072.68 528.378   2
  -5   3   1 1643.64 442.506   2
  -5   3   0 72113.6 2598.28   2
   5  -3   0 65443.2 2545.91   2
  -5  -3   0 69411.6 2361.28   1
  -5  -3   0 63053.4 2971.77   2
   5  -3   1 50664.6 2081.09   2
  -5  -3  -1 54019.5 2637.73   2
  -5  -3  -1 49675.7 2064.96   1
  -5   3  -1 48546.4 2041.92   2
   5  -3   2 208010. 5960.77   2
  -5  -3  -2 213538. 6216.92   1
  -5  -3  -2 200020. 6703.26   2
  -5   3  -2 203174. 5929.28   2
   5   3   2 205096. 6771.09   2
   5   3   3 6511.66 1004.79   2
   5  -3   3 7546.73 746.411   2
  -5  -3  -3 7312.84 852.796   1
  -5   3  -3 7958.76 747.799   2
  -5  -3  -3 7315.26 956.531   2
  -5  -3  -4 63244.9 2976.68   1
   5  -3   4 68476.2 2639.25   2
  -5  -3  -4 60535.0 3123.37   2
   5   3   4 66183.3 3278.61   2
   5   3   5 37753.8 2423.50   2
  -5   3  -5 35333.7 2445.28   1
  -5  -3  -5 35580.3 2231.89   1
   5  -3   5 36140.0 1868.73   2
   5  -3   6 25865.2 1631.09   2
  -5  -3  -6 26299.2 2007.46   1
   5   3   6 27677.2 2139.12   2
   5  -3   7 3498.41 646.342   2
  -5  -3  -7 2318.45 699.552   1
   5   3   7 3531.18 853.459   2
   5   3   8 60488.6 3523.71   2
   5  -3   8 64508.7 3016.94   2
   5   3   9 1128.41 696.748   2
   5  -3   9 564.596 467.685   2
   5   3  10 90066.1 4726.59   2
   5  -3  10 89147.0 3996.79   2
   5   3  11-33.8870 672.405   2
   5  -3  11 434.985 437.335   2
   5   3  12 31850.4 2826.31   2
   5  -3  12 23677.1 2049.43   2
   5   3  13 4846.73 1308.72   2
  -5   4  17 3153.50 1157.66   1
  -5  -4  17 3412.42 1307.57   1
  -5  -4  16 35068.5 3258.86   1
  -5   4  16 37404.1 3417.65   1
  -5   4  15 3076.13 1118.34   1
  -5  -4  15 4510.24 1323.64   1
  -5   4  14 52084.0 3793.42   1
  -5  -4  14 51633.3 3683.17   1
  -5   4  13 1868.98 911.781   1
  -5  -4  13 667.019 738.834   1
  -5  -4  12 4173.18 1066.21   1
  -5   4  12 3784.80 1092.58   1
   5   4 -11 1020.96 603.344   1
  -5  -4  11 707.925 596.764   1
  -5   4  11 1497.76 942.613   1
  -5  -4  10 2247.65 817.814   1
   5   4 -10 2728.24 701.115   1
  -5   4  10 2208.90 761.750   1
  -5  -4   9 6894.48 1021.31   1
   5   4  -9 7314.15 971.649   1
  -5   4   9 7061.31 1130.42   1
  -5  -4   9 8370.19 1179.71   2
   5   4  -8 70511.2 3004.08   1
  -5   4   8 59243.3 3273.27   1
  -5  -4   8 64393.9 3038.51   1
  -5  -4   8 62798.3 3249.93   2
   5   4  -7 5217.00 704.374   1
  -5  -4   7 6570.30 969.483   2
  -5  -4   7 5389.14 772.634   1
  -5  -4   6 122005. 4707.38   2
  -5  -4   6 118639. 4091.85   1
   5   4  -6 121961. 3988.43   1
  -5  -4   5 11672.1 1199.65   2
   5   4  -5 11756.5 830.269   1
  -5  -4   5 11748.4 882.526   1
  -5  -4   4 148187. 5387.12   2
  -5  -4   4 157696. 4431.90   1
  -5  -4   3 50008.7 2565.81   2
  -5  -4   3 47971.9 1611.41   1
  -5   4   3 49314.7 2234.81   2
  -5  -4   2 182436. 4718.64   1
  -5   4   2 189735. 5605.99   2
  -5  -4   2 190022. 6197.00   2
  -5  -4   1 28804.3 1069.96   1
  -5   4   1 30711.4 1514.15   2
  -5   4   0 49941.3 2015.48   2
  -5  -4   0 49762.2 1777.55   1
  -5  -4   0 55757.5 2716.67   2
  -5  -4  -1 149954. 4422.10   1
   5  -4   1 145634. 4398.15   2
  -5  -4  -1 149455. 5331.77   2
  -5   4  -1 147150. 4385.70   2
  -5  -4  -2 6524.23 920.134   2
  -5   4  -2 6401.77 596.134   2
   5  -4   2 6044.21 597.274   2
  -5  -4  -2 5598.22 655.672   1
   5  -4   3 19970.5 1126.54   2
  -5  -4  -3 20363.4 1677.91   2
  -5  -4  -3 20603.7 1393.01   1
   5   4   3 17752.3 1601.71   2
   5  -4   4 22849.0 1265.21   2
  -5  -4  -4 24803.8 1675.56   1
   5   4   4 24148.6 1935.04   2
   5  -4   5 71.6102 233.127   2
  -5  -4  -5-51.4187 465.485   1
   5   4   5-425.402 535.278   2
   5  -4   6 3325.36 559.308   2
  -5  -4  -6 2922.82 733.865   1
   5   4   6 3511.66 828.814   2
  -5  -4  -7 18616.6 1764.74   1
   5   4   7 14017.4 1650.18   2
   5  -4   7 18959.3 1343.35   2
   5  -4   8 10009.0 1034.09   2
   5   4   8 7725.05 1292.05   2
   5   4   9 45417.6 3168.26   2
   5  -4   9 44456.0 2410.34   2
   5   4  10 39540.2 3058.48   2
   5  -4  10 39946.4 2374.75   2
   5   4  11 36359.1 3051.73   2
   5  -4  11 38006.1 2386.37   2
   5   4  12 71396.9 4536.15   2
   5   4  13 36003.7 3233.12   2
  -5  -5  17 10703.4 1901.35   1
  -5   5  17 12408.6 2140.97   1
  -5  -5  16 16877.2 2361.42   1
  -5   5  16 17118.3 2399.99   1
  -5   5  15 15280.7 2173.15   1
  -5  -5  15 14844.9 2095.75   1
  -5  -5  14 115742. 5864.44   1
  -5   5  14 124309. 6191.87   1
  -5  -5  13 18715.3 2143.14   1
  -5   5  13 22498.6 2412.38   1
  -5   5  12 370756. 12303.9   1
  -5  -5  12 372736. 12044.2   1
   5   5 -11 20350.3 1828.28   1
  -5   5  11 17661.5 2032.00   1
  -5  -5  11 21018.7 1979.93   1
   5   5 -10 362662. 10677.0   1
  -5   5  10 328851. 11152.5   1
  -5  -5  10 357391. 10915.3   1
  -5   5   9 26979.8 2244.65   1
   5   5  -9 30989.1 2012.69   1
  -5  -5   9 30930.3 2231.64   2
  -5  -5   9 31233.4 2165.11   1
   5   5  -8 107282. 3995.15   1
  -5  -5   8 104392. 4482.38   2
  -5  -5   8 99430.2 4073.62   1
  -5   5   8 104324. 4625.11   1
   5   5  -7 17343.5 1258.90   1
  -5  -5   7 21212.7 1723.30   2
  -5  -5   7 17318.0 1335.90   1
  -5  -5   6 38081.7 2321.83   2
  -5  -5   6 37740.7 1851.11   1
   5   5  -6 35356.7 2232.62   2
   5   5  -6 37013.9 1746.30   1
  -5  -5   5 1497.65 518.785   2
  -5  -5   5 1037.06 329.765   1
   5   5  -5 1470.66 332.500   1
  -5  -5   4 10665.7 1157.61   2
  -5  -5   4 10590.9 657.562   1
  -5  -5   3 2236.19 671.214   2
  -5   5   3 999.418 368.775   2
  -5   5   2 9976.44 862.097   2
  -5  -5   2 8557.12 1034.97   2
  -5   5   1 43192.2 1869.19   2
  -5  -5   1 44344.6 2464.55   2
  -5   5   0 92687.6 3016.06   2
  -5  -5   0 90500.7 2569.61   1
  -5  -5  -1 26386.3 1221.95   1
  -5  -5  -1 28995.6 1974.88   2
  -5   5  -1 30254.6 1302.19   2
  -5  -5  -2 91672.6 3182.99   1
  -5   5  -2 94309.0 2887.73   2
  -5  -5  -2 93908.6 4054.72   2
   5   5   3 306.228 513.364   2
   5  -5   3 530.740 201.245   2
  -5  -5  -3 413.089 246.994   1
  -5  -5  -3 523.585 356.821   2
   5   5   4 6984.15 1106.76   2
   5  -5   4 7112.36 594.455   2
  -5  -5  -4 6613.34 822.925   1
   5  -5   5 530.058 236.013   2
  -5  -5  -5 715.413 395.927   1
   5  -5   6 661.842 257.002   2
  -5  -5  -6 1244.18 491.509   1
   5   5   6 1205.00 626.719   2
   5  -5   7 1459.72 383.117   2
  -5  -5  -7 1998.90 635.199   1
   5   5   8 18178.7 2000.32   2
   5  -5   8 23576.4 1471.55   2
   5  -5   9 55.3430 298.077   2
   5   5   9 212.467 606.639   2
   5   5  10 41674.7 3286.73   2
   5  -5  10 45179.8 2381.88   2
   5   5  11 1955.73 965.102   2
   5   5  12 1037.77 817.462   2
  -5   6  17 2335.44 894.763   1
  -5  -6  17 502.728 883.214   1
  -5   6  16 31995.9 3188.46   1
  -5  -6  16 33021.8 3154.61   1
  -5   6  15 2727.20 1237.46   1
  -5  -6  15 2901.14 1085.13   1
  -5   6  14 60624.6 4186.73   1
  -5  -6  14 55120.9 3830.46   1
  -5  -6  13 2553.19 1086.21   1
  -5   6  13 4050.09 1316.53   1
  -5   6  12 20819.6 2264.99   1
  -5  -6  12 18381.0 2025.09   1
   5   6 -11 1944.48 623.536   1
  -5   6  11 821.762 906.649   1
  -5  -6  11 1621.02 855.099   1
  -5   6  10 18233.6 1945.17   1
   5   6 -10 17255.2 1591.80   1
  -5  -6  10 17825.1 1744.02   1
  -5   6   9 36265.5 2622.58   1
  -5  -6   9 31449.6 2182.64   1
   5   6  -9 28881.4 1962.16   1
  -5  -6   9 33762.0 2372.64   2
   5   6  -8 127480. 4443.29   1
  -5  -6   8 119021. 4557.00   1
  -5  -6   8 124272. 4997.96   2
  -5   6   8 109726. 5010.36   1
  -5   6   7 645.529 575.170   1
  -5  -6   7 614.162 422.165   2
   5   6  -7 410.583 312.855   1
  -5  -6   7 302.735 329.837   1
   5   6  -6 80515.0 2893.01   1
  -5  -6   6 83133.1 3748.10   2
  -5  -6   6 79921.7 3014.43   1
   5   6  -6 80291.8 3679.85   2
   5   6  -5 661.592 238.778   1
  -5  -6   5 530.062 241.470   1
   5   6  -5 478.161 423.793   2
  -5  -6   4 189805. 6502.88   2
   5   6  -4 187949. 6476.40   2
  -5  -6   3 2129.14 625.071   2
  -5  -6   2 337543. 10184.6   2
  -5   6   2 340685. 9242.72   2
  -5   6   1 571.726 289.754   2
  -5  -6   1 1154.57 521.569   2
  -5   6   0 231596. 6290.29   2
  -5  -6   0 229103. 7588.06   2
  -5  -6  -1 3444.20 726.796   2
  -5   6  -1 4338.79 417.339   2
  -5  -6  -1 3941.82 376.212   1
  -5  -6  -2 22459.9 1211.08   1
  -5   6  -2 22236.9 936.011   2
   5   6   3 8656.55 1188.64   2
  -5  -6  -3 7823.23 799.554   1
  -5  -6  -3 7607.68 1104.87   2
   5   6   4 3725.96 868.570   2
  -5  -6  -4 3050.54 582.977   1
   5  -6   5 3297.77 346.981   2
  -5  -6  -5 2664.48 591.251   1
   5   6   5 3266.85 905.871   2
   5  -6   6 1444.23 294.002   2
  -5  -6  -6 1139.51 485.336   1
   5   6   6 1269.19 693.377   2
   5  -6   7 16544.2 996.313   2
  -5  -6  -7 15923.9 1615.21   1
   5   6   7 16465.8 1865.21   2
   5   6   7 14660.1 1522.58   1
   5  -6   8 4363.37 563.777   2
   5   6   8 2345.02 723.896   1
   5   6   8 3400.95 1041.15   2
   5  -6   9 3650.77 569.309   2
   5   6   9 3001.25 939.901   2
   5   6  10 83612.8 4878.84   2
   5   6  11 1539.88 887.291   2
   5   6  12 140577. 7016.31   2
  -5   7  16 14653.6 2270.07   1
  -5  -7  16 17497.2 2340.30   1
  -5  -7  15 45735.9 3605.11   1
  -5   7  15 50463.8 3912.26   1
  -5  -7  14 66753.3 4272.33   1
  -5   7  14 67525.5 4485.81   1
  -5  -7  13 7229.47 1335.91   1
  -5   7  13 8814.92 1631.55   1
  -5   7  12 188072. 7739.74   1
  -5  -7  12 179813. 7228.46   1
  -5   7  11 16400.6 1980.97   1
   5   7 -11 19932.2 1781.64   1
  -5  -7  11 15660.3 1752.79   1
  -5   7  10 208071. 7984.37   1
   5   7 -10 222627. 7270.34   1
  -5  -7  10 199558. 7338.78   1
  -5  -7   9 18715.9 1637.14   1
  -5   7   9 18605.7 1927.73   1
   5   7  -9 17635.8 1507.36   1
  -5  -7   8 70786.5 3577.65   2
  -5  -7   8 67708.1 3154.73   1
   5   7  -8 71135.0 3055.37   1
  -5   7   8 69535.1 3771.97   1
  -5  -7   7 43109.8 2631.96   2
   5   7  -7 42642.2 2063.05   1
   5   7  -7 41581.3 2593.58   2
  -5   7   7 45410.8 2873.79   1
  -5  -7   6 4427.16 847.484   2
   5   7  -6 4126.52 539.107   1
   5   7  -6 3660.57 815.591   2
  -5   7   6 3728.91 900.041   1
  -5  -7   5 18141.9 1600.15   2
   5   7  -5 16736.7 1565.81   2
   5   7  -5 17799.2 940.444   1
  -5  -7   4 3427.22 721.018   2
   5   7  -4 3194.80 769.709   2
   5   7  -4 2587.31 236.824   1
  -5  -7   3 2452.02 686.810   2
   5   7  -3 2735.61 770.580   2
   5   7  -2 20944.0 1783.82   2
  -5   7   2 21470.1 1292.25   2
  -5  -7   2 21059.4 1735.85   2
  -5   7   1 6688.69 670.387   2
  -5  -7   1 7499.83 1058.00   2
  -5   7   0 136496. 3933.11   2
  -5  -7   0 131045. 5215.83   2
  -5  -7  -1 6778.46 1016.30   2
  -5   7  -1 7692.50 484.435   2
  -5  -7  -2 101651. 3207.43   1
   5   7   2 94217.9 4406.42   2
   5   7   3 1834.80 756.768   2
  -5  -7  -3 3591.29 530.878   1
  -5  -7  -4 15882.4 1252.93   1
   5   7   4 15984.0 1738.48   2
  -5  -7  -5 447.862 346.536   1
   5   7   5 127.879 355.122   1
   5   7   5 481.574 585.646   2
   5   7   6 4685.92 851.050   1
  -5  -7  -6 6595.58 953.893   1
   5   7   6 5154.36 1152.16   2
   5   7   7-87.3741 370.112   1
  -5  -7  -7 1106.89 549.758   1
   5   7   7 1062.05 688.908   2
   5   7   8 45236.8 2920.56   1
   5   7   8 48646.6 3478.56   2
   5   7   9 4805.69 975.281   1
   5   7   9 4540.97 1199.18   2
   5   7  10 37770.6 2907.23   1
   5   7  10 40046.4 3337.23   2
   5   7  11 18214.8 2350.60   2
   5   7  12 1552.14 1096.46   2
  -5   8  16 50915.3 4150.88   1
  -5   8  15 3155.63 1274.36   1
  -5   8  14 30487.0 2947.97   1
  -5   8  13 842.429 708.309   1
  -5   8  12 12704.1 1778.35   1
  -5   8  11 15456.4 1967.31   1
   5   8 -11 14834.5 1585.24   1
  -5   8  10 23095.9 2293.56   1
   5   8 -10 24254.5 1874.99   1
  -5   8   9 29756.1 2517.00   1
   5   8  -9 29142.4 1948.69   1
   5   8  -8 78772.5 3288.31   1
  -5   8   8 78376.6 4143.07   1
   5   8  -7 477.055 321.927   1
   5   8  -7-119.746 516.768   2
  -5   8   7 225.953 531.624   1
  -5  -8   6 65887.2 3367.06   2
   5   8  -6 64314.7 2439.93   1
   5   8  -6 62448.5 3307.97   2
  -5   8   6 64865.7 3536.54   1
   5   8  -5 27926.2 1224.71   1
   5   8  -5 28920.9 2112.38   2
  -5   8   5 26797.1 2146.63   1
  -5  -8   5 27473.8 2064.40   2
   5   8  -4 68856.6 3463.47   2
  -5  -8   4 72895.5 3538.90   2
   5   8  -3 121355. 4989.94   2
  -5  -8   3 128082. 5073.51   2
   5   8  -2 62258.9 3327.83   2
  -5  -8   2 72297.4 3489.07   2
   5   8  -1 148582. 5734.54   2
  -5   8   1 146205. 4454.07   2
  -5  -8   1 153070. 5726.34   2
   5   8   0 88405.1 4133.66   2
  -5   8   0 87664.9 2752.59   2
  -5  -8   0 95361.8 4199.13   2
   5   8   1 103878. 4650.89   2
   5   8   2 30641.4 2356.51   2
  -5  -8  -3 48298.8 2056.59   1
   5   8   3 42118.6 2893.84   2
   5   8   4-692.232 628.897   2
  -5  -8  -4 372.315 321.867   1
   5   8   4 165.297 317.075   1
  -5  -8  -5 1695.05 590.442   1
   5   8   5 1091.73 448.244   1
   5   8   5 1109.78 671.120   2
  -5  -8  -6 395.393 369.043   1
   5   8   6 321.300 410.971   1
   5   8   6 847.649 701.800   2
   5   8   7 31733.4 2270.81   1
   5   8   7 32509.1 2832.98   2
  -5  -8  -7 37319.1 2444.46   1
   5   8   8 2000.63 749.195   1
   5   8   8 4373.75 1177.41   2
   5   8   9 58594.7 4047.47   2
   5   8   9 50362.7 3247.08   1
   5   8  10 21275.8 2168.09   1
   5   8  10 23746.0 2695.46   2
   5   8  11 39912.1 3096.66   1
   5   8  11 39600.4 3528.49   2
  -5   9  15 39827.2 3622.74   1
  -5   9  14 1853.52 981.020   1
  -5   9  13 32169.0 3022.95   1
  -5   9  12 5566.11 1272.27   1
  -5   9  11 33408.0 2891.43   1
  -5   9  10 16421.5 1927.18   1
   5   9 -10 17316.1 1602.50   1
   5   9  -9 48475.3 2561.92   1
  -5   9   9 39409.9 3010.28   1
   5   9  -8 36481.4 2049.95   1
  -5   9   8 34059.2 2693.31   1
   5   9  -7 32014.2 1740.62   1
   5   9  -7 27640.7 2156.26   2
  -5   9   7 31702.2 2495.82   1
  -5  -9   6 3790.03 827.222   2
   5   9  -6 2901.76 801.967   2
   5   9  -6 3969.33 545.962   1
  -5   9   6 4722.00 1072.41   1
   5   9  -5 26565.2 1190.88   1
   5   9  -5 26696.9 2077.94   2
  -5   9   5 26564.1 2206.78   1
  -5  -9   5 27188.1 2089.82   2
   5   9  -4 9504.82 1279.88   2
  -5  -9   4 10998.5 1287.74   2
   5   9  -3 1176.66 579.600   2
  -5  -9   3 353.235 371.619   2
   5   9  -2 629.141 565.580   2
  -5  -9   2 1585.29 617.875   2
   5   9  -1 292.211 444.229   2
  -5   9   1 385.308 298.484   2
   5   9   0 42187.1 2731.99   2
  -5   9   0 39150.0 1484.66   2
   5   9   1 1822.35 655.912   2
   5   9   2 86822.2 4368.27   2
   5   9   3 71097.9 2635.82   1
   5   9   3 63448.4 3799.86   2
   5   9   4 117154. 4181.33   1
  -5  -9  -4 124768. 4242.19   1
   5   9   4 119335. 5604.40   2
   5   9   5 83147.7 3543.63   1
  -5  -9  -5 91247.7 3666.79   1
   5   9   5 86769.0 4730.47   2
   5   9   6 158914. 5783.55   1
  -5  -9  -6 167468. 5901.48   1
   5   9   6 158407. 7002.45   2
   5   9   7 54008.6 3044.30   1
  -5  -9  -7 55800.2 3105.51   1
   5   9   7 55180.2 3844.10   2
   5   9   8 79076.8 4005.33   1
   5   9   8 85060.2 4991.92   2
   5   9   9 1413.28 561.469   1
   5   9   9 2332.91 1083.05   2
   5   9  10 46788.3 3837.36   2
   5   9  10 42156.0 3070.36   1
   5   9  11 550.665 671.830   1
   5   9  11 106.078 726.864   2
  -5  10  15 7218.18 1597.39   1
  -5  10  14 2768.86 979.904   1
  -5  10  13-131.455 685.699   1
  -5  10  12-589.908 680.531   1
  -5  10  11 688.003 609.203   1
  -5  10  10 1783.12 789.084   1
   5  10 -10 1570.86 605.830   1
  -5  10   9 146.123 657.141   1
   5  10  -9 211.444 381.268   1
  -5  10   8 10087.0 1514.32   1
   5  10  -8 9853.63 1038.25   1
   5  10  -7 25133.6 1538.01   1
   5  10  -7 25034.8 2079.90   2
  -5  10   7 26408.7 2356.16   1
   5  10  -6 54875.2 2207.48   1
   5  10  -6 49729.9 3048.52   2
  -5  10   6 56506.3 3458.62   1
   5  10  -5 108631. 3297.40   1
   5  10  -5 108671. 4787.05   2
  -5  10   5 109685. 5075.91   1
   5  10  -4 58350.7 3281.09   2
   5  10  -3 46480.7 2886.48   2
   5  10  -2 1740.09 703.047   2
   5  10  -1 66756.9 3653.49   2
  -5  10   1 69906.2 2526.30   2
   5  10   0 868.143 626.524   2
  -5  10   0 947.641 219.179   2
  -5  10   0 1301.01 252.315   2
   5  10   1 49782.7 3189.60   2
   5  10   2 6573.54 1268.94   2
   5  10   2 6081.43 523.557   1
   5  10   3 43360.2 1890.23   1
   5  10   3 35706.7 2874.73   2
   5  10   4 1301.44 944.835   2
   5  10   4 2813.22 585.963   1
  -5 -10  -5 899.947 405.310   1
   5  10   5 754.139 466.373   1
   5  10   6-376.936 497.498   1
   5  10   6 1496.73 898.536   2
   5  10   7 45470.4 2741.83   1
   5  10   7 45377.6 3586.46   2
   5  10   8 2351.51 687.304   1
   5  10   8 3791.62 1167.35   2
   5  10   9 26733.5 2295.93   1
   5  10   9 28387.3 2917.75   2
   5  10  10 1617.03 720.150   1
   5  10  10 1879.58 1194.09   2
  -5  11  14-1203.11 884.254   1
  -5  11  13-779.515 850.016   1
  -5  11  12 2060.51 959.398   1
  -5  11  11 520.946 569.244   1
  -5  11  10 1084.87 814.043   1
   5  11  -9 42775.0 2415.28   1
  -5  11   9 35382.9 2964.46   1
  -5  11   8 4841.83 1086.06   1
   5  11  -8 6008.25 851.288   1
   5  11  -7 88717.3 3386.41   1
   5  11  -7 88636.9 4331.14   2
  -5  11   7 91260.9 4772.12   1
   5  11  -6 4302.16 1009.15   2
   5  11  -6 3485.51 525.688   1
  -5  11   6 3809.41 1119.68   1
   5  11  -5 30234.4 2375.03   2
   5  11  -5 33789.4 1433.80   1
  -5  11   5 34645.3 2717.44   1
   5  11  -4 110.280 469.043   2
   5  11  -4 393.761 126.268   1
   5  11  -4 268.137 109.134   1
   5  11  -3 1014.76 584.798   2
   5  11  -2 1478.58 691.013   2
   5  11  -1 13169.1 1603.03   2
  -5  11   1 15228.1 1023.55   2
  -5  11   0 6966.78 501.930   2
  -5  11   0 6341.71 488.692   2
   5  11   1 42582.1 3039.66   2
   5  11   2 3329.33 980.844   2
   5  11   2 2950.96 384.307   1
   5  11   3 175897. 5204.42   1
   5  11   3 162443. 7124.57   2
   5  11   4 23538.4 1518.17   1
   5  11   4 25118.1 2504.29   2
   5  11   5 353726. 10429.5   1
   5  11   5 397625. 12931.7   2
   5  11   6 25460.8 1876.50   1
   5  11   6 30755.5 2930.17   2
   5  11   7 236916. 7967.05   1
   5  11   7 238691. 9660.34   2
   5  11   8 5272.16 1047.20   1
   5  11   8 6216.93 1530.60   2
   5  11   9 37793.5 2733.51   1
   5  11   9 40715.0 3602.28   2
   5  11  10-303.391 661.174   1
   5  11  10-1299.71 923.917   2
  -5  12  13 512.683 624.298   1
  -5  12  12 1041.49 829.453   1
  -5  12  11 1190.86 766.517   1
  -5  12  10 7648.10 1445.03   1
  -5  12   9 543.597 600.133   1
  -5  12   8 8996.05 1535.76   1
   5  12  -8 11592.7 1472.70   2
   5  12  -7 34979.3 2609.14   2
   5  12  -7 39354.4 2024.51   1
  -5  12   7 35917.0 2920.35   1
   5  12  -6 3563.04 941.457   2
   5  12  -6 5339.16 653.579   1
  -5  12   6 4346.55 1118.73   1
   5  12  -5 187644. 7084.49   2
   5  12  -5 183004. 5167.11   1
  -5  12   5 174648. 7308.76   1
   5  12  -4 3489.14 310.105   1
   5  12  -4 2587.94 829.897   2
   5  12  -4 3258.43 306.584   1
   5  12  -3 122440. 5419.01   2
   5  12  -2 478.885 569.380   2
  -5  12   2 573.903 333.558   2
   5  12  -1 41783.2 2967.04   2
  -5  12   1 45140.6 1942.14   2
   5  12   0 896.189 661.305   2
  -5  12   0 1443.66 242.035   2
  -5  12   0 1725.97 256.476   2
   5  12   1 38285.0 2949.88   2
   5  12   2 27340.8 1233.56   1
   5  12   2 31278.6 2702.65   2
   5  12   3 32001.6 1588.27   1
   5  12   3 34138.4 2914.27   2
   5  12   4 6608.39 1381.44   2
   5  12   4 6031.37 762.747   1
   5  12   5 1957.96 968.572   2
   5  12   5 1132.63 466.866   1
   5  12   6 5469.98 1446.25   2
   5  12   6 2926.96 659.511   1
   5  12   7 37841.4 2430.11   1
   5  12   7 32405.5 3157.13   2
   5  12   8 23993.3 2796.84   2
   5  12   9 24392.0 2880.54   2
  -5  13  12 1460.25 881.647   1
  -5  13  11 58071.8 4173.25   1
  -5  13  10 2066.14 925.052   1
  -5  13   9 48448.2 3628.46   1
  -5  13   8-4.57340 588.638   1
   5  13  -8 112.212 480.719   2
   5  13  -7 23149.9 2121.53   2
  -5  13   7 23605.2 2413.44   1
   5  13  -6 918.922 644.480   2
  -5  13   6 1689.37 806.411   1
   5  13  -5 13864.6 1697.31   2
  -5  13   5 13757.7 1799.13   1
   5  13  -4 3604.29 942.678   2
   5  13  -4 3010.11 314.222   1
   5  13  -3 450.360 607.789   2
  -5  13   3 366.137 399.430   2
   5  13  -2 12425.3 1635.33   2
  -5  13   2 14528.9 1177.74   2
   5  13  -1 8860.44 1460.66   2
  -5  13   1 9255.74 792.172   2
   5  13   0 18279.4 2017.73   2
  -5  13   0 17012.6 769.395   2
   5  13   1 34346.9 2866.10   2
   5  13   2 19665.6 2202.73   2
   5  13   3 79589.8 4743.86   2
   5  13   4 12147.3 1826.78   2
   5  13   5 104368. 5813.85   2
   5  13   6 25896.8 2861.33   2
   5  13   7 50752.2 4074.18   2
   5  13   8 29782.4 3141.11   2
  -5  14  11 1184.43 876.290   1
  -5  14  10 28033.0 2903.08   1
  -5  14   9 222.540 777.078   1
  -5  14   8 35272.2 3100.46   1
   5  14  -8 36079.8 2757.32   2
  -5  14   7 6792.25 1425.93   1
   5  14  -7 7663.76 1356.08   2
   5  14  -6 21687.3 2129.00   2
  -5  14   6 23056.7 2412.42   1
   5  14  -5 64660.3 3839.01   2
  -5  14   5 66805.2 3635.63   2
  -5  14   5 65273.0 4145.97   1
   5  14  -4 18316.3 1979.68   2
  -5  14   4 16407.4 2026.16   1
  -5  14   4 19626.5 1725.88   2
   5  14  -3 98597.5 4964.01   2
  -5  14   3 99893.5 4074.62   2
   5  14  -2 12907.2 1724.49   2
  -5  14   2 12284.4 1113.51   2
   5  14  -1 44588.4 3268.44   2
  -5  14   1 48867.2 2067.04   2
   5  14   0 1155.49 773.186   2
   5  14   1 39797.9 3165.05   2
   5  14   2-1336.17 832.699   2
   5  14   3 8247.99 1527.65   2
   5  14   4 5494.26 1387.87   2
   5  14   5-1501.80 892.350   2
   5  14   6 701.784 818.967   2
   5  14   7 14338.7 2187.36   2
  -5  15  10 76488.9 5025.29   1
  -5  15   9 30361.7 3042.87   1
  -5  15   8 6846.87 1499.26   1
   5  15  -8 8267.76 1334.37   2
  -5  15   7 13618.2 1953.24   1
   5  15  -7 12190.0 1652.04   2
  -5  15   7 18180.5 2099.40   2
   5  15  -6 1505.78 684.155   2
  -5  15   6 1696.90 681.531   2
  -5  15   6 620.782 803.220   1
   5  15  -5 11119.2 1620.98   2
  -5  15   5 11584.9 1460.07   2
  -5  15   5 8328.66 1588.23   1
   5  15  -4 8311.33 1405.33   2
  -5  15   4 6953.40 1007.58   2
  -5  15   4 5992.76 1263.96   1
   5  15  -3 269.389 650.052   2
  -5  15   3 969.420 433.110   2
   5  15  -2 168.989 588.320   2
   5  15  -1 2465.53 904.077   2
   5  15   0 22735.4 2391.60   2
   5  15   1 9054.23 1578.84   2
   5  15   2 32584.2 3023.01   2
   5  15   3 4141.49 1210.10   2
   5  15   4 9943.52 1819.22   2
   5  15   5-1576.60 995.741   2
   5  15   6 1462.47 907.111   2
  -5  16   8 6680.76 1453.76   1
   5  16  -8 11663.8 1544.07   2
  -5  16   8 10203.3 1621.70   2
  -5  16   7 6517.34 1396.31   1
   5  16  -7 7200.72 1282.58   2
  -5  16   7 6079.13 1242.93   2
   5  16  -6 18571.2 2055.88   2
  -5  16   6 27373.5 2419.68   2
  -5  16   6 24125.3 2638.78   1
  -5  16   5 12053.5 1915.47   1
   5  16  -5 12368.8 1715.73   2
  -5  16   5 14300.5 1619.70   2
   5  16  -4 48518.9 3430.40   2
  -5  16   4 45914.1 3595.06   1
   5  16  -3 20296.1 2227.25   2
   5  16  -2 60063.6 3969.03   2
   5  16  -1 30087.3 2809.36   2
   5  16   0 38477.2 3217.73   2
   5  16   1 4372.87 1189.43   2
   5  16   2 8096.05 1609.07   2
   5  16   3 448.856 718.418   2
   5  16   4-1415.86 920.113   2
  -5  17   6 4182.68 1214.20   1
   5  17  -6 4693.23 1100.00   2
   5  17  -5 5125.14 1141.84   2
  -5  17   5 4087.71 1183.40   1
   5  17  -4 1983.46 835.806   2
  -5  17   4 255.327 528.316   1
   5  17  -3 3746.20 1080.10   2
  -5  17   3 3050.27 931.806   1
   5  17  -2 1760.44 717.484   2
   5  17  -1 2554.87 903.450   2
   5  17   0 11513.9 1873.43   2
   5  17   1 3427.57 1070.65   2
  -6   0  17-1735.85 1032.54   1
  -6   0  16 71176.8 4700.34   1
  -6   0  15 194.131 753.417   1
  -6   0  14 5603.38 1207.63   1
  -6   0  13 531.223 629.380   1
  -6   0  12 1026.95 651.106   1
  -6   0  11-966.580 611.861   1
  -6   0  10 30545.4 2268.20   1
   6   0 -10 29739.2 2162.76   1
  -6   0   9-237.617 661.739   1
   6   0  -9 563.625 381.071   1
  -6   0   8 182032. 6441.49   1
  -6   0   8 195447. 6748.39   2
   6   0  -8 184738. 6343.22   1
  -6   0   7 1222.12 613.569   1
  -6   0   7 1522.80 628.814   2
  -6   0   6 253512. 7846.65   2
  -6   0   6 231059. 7383.85   1
  -6   0   5 3085.74 696.496   1
  -6   0   5 2444.17 737.159   2
  -6   0   4 769775. 20272.5   2
  -6   0   4 777605. 19850.6   1
  -6   0   3 323.769 434.759   2
   6   0  -3-137.582 552.529   2
  -6   0   2 569299. 15347.4   2
   6   0  -2 573960. 15370.7   2
  -6   0   1-146.514 477.849   2
   6   0  -1-84.9780 475.375   2
   6   0   0 107525. 4149.05   2
  -6   0   0 120553. 4303.25   2
   6   0   1 94.2508 378.827   2
  -6   0  -1-141.103 318.565   2
   6   0   2 25376.3 1727.44   2
  -6   0  -2 27150.3 1755.92   2
   6   0   3 851.343 512.510   2
  -6   0  -3 1081.04 507.353   2
  -6   0  -3 70.7814 477.794   1
   6   0   4 3100.34 729.482   2
  -6   0  -4 4676.60 814.626   2
   6   0   5 69.2709 569.585   2
  -6   0  -5 495.683 484.695   1
   6   0   6 17790.2 1619.02   2
   6   0   7 610.709 562.674   2
   6   0   8 30939.5 2322.63   2
   6   0   9 84.4563 452.393   2
   6   0  10 21645.6 2062.94   2
   6   0  11-469.603 530.432   2
   6   0  12 1627.79 685.777   2
  -6  -1  17 969.959 921.409   1
  -6   1  17-672.683 805.797   1
  -6  -1  16 7571.95 1590.89   1
  -6   1  16 10903.1 1895.70   1
  -6   1  15 6849.90 1428.81   1
  -6  -1  15 7254.74 1509.24   1
  -6   1  14 1804.92 852.587   1
  -6  -1  14 1507.52 892.615   1
  -6   1  13 2138.21 862.927   1
  -6  -1  13 3639.09 960.340   1
  -6   1  12 21330.7 2103.46   1
  -6  -1  12 20155.6 2049.07   1
  -6  -1  11 715.875 528.710   1
  -6   1  11 411.913 485.874   1
  -6   1  10 17391.9 1742.68   1
  -6  -1  10 18010.1 1783.15   1
   6   1 -10 16342.6 1560.56   1
  -6   1   9 4372.17 892.547   1
   6  -1  -9 4280.80 820.904   1
  -6  -1   9 4360.26 844.094   1
   6   1  -9 4429.91 786.164   1
  -6   1   8 138370. 5278.54   1
  -6  -1   8 131714. 5095.60   1
  -6  -1   8 142170. 5457.72   2
  -6   1   8 144763. 5481.86   2
   6  -1  -8 137261. 5188.37   1
   6   1  -8 136668. 5027.07   1
  -6   1   7 4507.73 890.656   1
  -6  -1   7 6598.98 911.633   1
  -6  -1   7 5503.35 930.299   2
  -6   1   7 4675.79 812.305   2
   6   1  -7 5130.58 783.561   1
  -6  -1   6 152452. 5383.15   2
  -6   1   6 147871. 5273.97   2
  -6  -1   6 133942. 4786.19   1
  -6   1   6 130591. 4946.09   1
  -6  -1   5 1811.49 542.762   1
  -6  -1   5 2050.63 617.702   2
  -6   1   5 1918.36 618.616   2
  -6   1   5 1439.77 568.598   1
  -6  -1   4 2211.51 659.210   2
  -6   1   4 2601.15 680.748   2
  -6   1   4 2450.07 646.883   1
  -6  -1   4 1721.19 485.119   1
  -6  -1   3 6731.02 955.768   2
  -6   1   3 5831.59 875.245   2
   6  -1  -3 5749.73 924.222   2
  -6  -1   2 65402.9 3054.56   2
  -6   1   2 68521.4 2984.32   2
   6   1  -2 70042.8 3142.29   2
   6  -1  -2 72334.6 3055.87   2
  -6  -1   1 1823.24 537.144   2
  -6   1   1 1958.73 511.142   2
   6   1  -1 1878.64 619.142   2
   6  -1  -1 1681.12 573.746   2
   6   1   0 127718. 4686.97   2
   6  -1   0 130221. 4516.67   2
  -6  -1   0 126023. 4660.21   2
  -6   1   0 125010. 4440.21   2
   6   1   1 2380.08 652.007   2
   6  -1   1 1880.43 478.737   2
  -6  -1  -1 1812.31 528.751   2
  -6   1  -1 2833.12 553.993   2
  -6  -1  -2 101165. 3962.47   1
   6   1   2 101725. 4115.29   2
   6  -1   2 110885. 4009.22   2
  -6  -1  -2 103863. 4132.40   2
  -6   1  -2 102158. 3881.96   2
   6  -1   3 21143.9 1568.90   2
  -6  -1  -3 20303.9 1587.34   1
  -6   1  -3 19412.4 1453.26   2
  -6  -1  -3 21247.6 1645.56   2
   6   1   3 21184.2 1691.18   2
   6  -1   4 177298. 5928.34   2
  -6  -1  -4 179532. 6166.34   2
  -6  -1  -4 176668. 6207.75   1
   6   1   4 172534. 6164.23   2
  -6   1  -4 165220. 6250.68   1
   6   1   5 4211.37 855.233   2
   6  -1   5 5529.90 835.308   2
  -6  -1  -5 4444.14 834.482   1
  -6   1  -5 4390.41 893.867   1
   6   1   6 212864. 7306.34   2
   6  -1   6 218001. 7051.90   2
   6  -1   7 9092.37 1166.96   2
   6   1   7 9792.45 1312.64   2
   6   1   8 48509.5 3122.84   2
   6  -1   8 58098.4 3151.01   2
   6  -1   9 13029.7 1501.52   2
   6   1   9 10909.2 1423.80   2
   6   1  10 9416.55 1424.83   2
   6  -1  10 8032.09 1242.97   2
   6  -1  11 7128.96 1228.97   2
   6   1  11 8073.23 1404.47   2
   6   1  12 1100.81 683.552   2
   6  -1  12 1732.65 717.752   2
  -6   2  17 12331.0 2088.57   1
  -6  -2  17 13510.4 2127.13   1
  -6  -2  16 26866.3 2854.59   1
  -6   2  16 28334.8 2938.26   1
  -6  -2  15 40090.8 3298.11   1
  -6   2  15 41724.2 3456.18   1
  -6  -2  14 3240.57 1127.27   1
  -6   2  14 2423.39 1019.90   1
  -6   2  13 869.530 713.782   1
  -6  -2  13-39.3969 629.285   1
  -6  -2  12 2520.79 881.316   1
  -6   2  12 2202.22 933.884   1
  -6   2  11 18226.1 1904.62   1
  -6  -2  11 25530.4 2129.90   1
  -6   2  10 21891.4 1984.95   1
  -6  -2  10 18407.2 1751.08   1
   6   2 -10 18970.7 1675.88   1
  -6   2   9 258513. 8627.86   1
  -6  -2   9 246466. 8272.10   1
   6  -2  -9 264592. 8567.82   1
   6   2  -9 269703. 8258.34   1
  -6   2   8 495.752 558.859   1
  -6  -2   8 412.054 506.630   2
   6   2  -8 729.017 420.978   1
  -6  -2   8 686.935 527.753   1
  -6  -2   7 143677. 5452.40   2
  -6  -2   7 155217. 5109.56   1
  -6   2   7 143142. 5399.30   2
   6   2  -7 136390. 4841.64   1
  -6   2   7 135745. 5291.19   1
  -6  -2   6 113587. 4062.49   1
  -6  -2   6 107318. 4503.27   2
  -6   2   6 113256. 4459.91   2
  -6   2   6 118615. 4504.41   1
  -6  -2   5 28765.6 1615.57   1
  -6  -2   5 28724.7 1969.97   2
  -6   2   5 27963.1 1878.79   2
  -6   2   5 31254.1 1959.44   1
  -6   2   4 371142. 10797.2   2
  -6  -2   4 375462. 10198.6   1
  -6  -2   3 68806.9 3167.33   2
  -6   2   3 69016.9 2960.04   2
  -6  -2   3 65667.6 2489.76   1
  -6   2   2 237905. 7400.19   2
   6  -2  -2 243762. 7434.24   2
  -6   2   1 93865.8 3552.49   2
   6   2  -1 96511.2 3901.81   2
   6  -2  -1 86995.0 3513.78   2
  -6  -2   1 102779. 3974.43   2
   6   2   0 71916.2 3256.22   2
   6  -2   0 73095.1 2961.21   2
  -6  -2   0 71359.7 3252.32   2
  -6   2   0 66472.1 2837.19   2
  -6  -2  -1 39220.2 2003.50   1
   6   2   1 43498.1 2433.92   2
   6  -2   1 43306.2 2129.34   2
  -6  -2  -1 42715.6 2402.93   2
  -6   2  -1 41009.7 2072.53   2
   6   2   2 33104.5 2121.64   2
   6  -2   2 33117.0 1826.72   2
  -6  -2  -2 30745.6 1846.85   1
  -6  -2  -2 29929.1 2010.00   2
  -6   2  -2 29000.9 1712.93   2
   6   2   3 828.930 466.122   2
   6  -2   3 762.006 397.367   2
  -6  -2  -3 870.187 448.733   1
  -6   2  -3 1585.51 442.654   2
  -6  -2  -3 1261.42 451.324   2
   6   2   4 1588.47 693.678   2
   6  -2   4 1581.44 518.595   2
  -6  -2  -4 1467.47 590.889   1
  -6  -2  -4 1540.72 535.660   2
  -6   2  -4 490.896 481.239   1
   6   2   5 1634.17 692.167   2
  -6  -2  -5 1559.60 520.301   1
   6  -2   5 2246.09 540.609   2
  -6  -2  -6 25463.2 2061.01   1
   6   2   6 22954.3 1993.62   2
   6  -2   6 23875.7 1759.48   2
   6   2   7 2271.21 791.726   2
   6  -2   7 1565.29 574.205   2
   6   2   8 87291.7 4479.78   2
   6  -2   8 99949.4 4237.05   2
   6  -2   9 724.473 600.138   2
   6   2   9 217.558 607.644   2
   6   2  10 61844.5 3809.94   2
   6  -2  10 61143.0 3402.62   2
   6  -2  11-39.5244 427.989   2
   6   2  11 363.439 689.613   2
   6   2  12 7433.56 1417.65   2
  -6  -3  17 5367.67 1447.04   1
  -6   3  17 7220.82 1676.93   1
  -6  -3  16 30232.8 3021.35   1
  -6   3  16 31509.0 3137.89   1
  -6   3  15 3905.44 1287.41   1
  -6  -3  15 1882.45 840.969   1
  -6  -3  14 71057.4 4339.50   1
  -6   3  14 72868.6 4512.03   1
  -6  -3  13 58095.4 3739.18   1
  -6   3  13 65640.9 4075.63   1
  -6  -3  12 96022.5 4796.28   1
  -6   3  12 105820. 5134.08   1
  -6  -3  11 87213.1 4260.53   1
  -6   3  11 86075.9 4450.76   1
   6   3 -11 82653.4 3974.76   1
   6   3 -10 111214. 4536.25   1
  -6  -3  10 117257. 4823.63   1
   6   3  -9 2391.12 638.641   1
  -6  -3   9 784.589 591.822   1
  -6   3   9 1626.63 828.437   1
  -6  -3   8 223701. 7434.19   2
  -6  -3   8 201807. 6768.83   1
   6   3  -8 211297. 6673.38   1
  -6   3   8 201911. 7257.82   1
  -6   3   7 7030.98 1047.96   1
  -6  -3   7 9452.33 1170.84   2
  -6  -3   7 8758.74 982.034   1
   6   3  -7 7872.90 877.888   1
  -6  -3   6 163631. 5883.24   2
  -6  -3   6 161970. 5148.03   1
  -6   3   6 160167. 5662.01   2
  -6   3   6 149222. 5640.76   1
  -6  -3   5 2770.34 654.704   2
  -6  -3   5 2879.50 518.257   1
  -6   3   5 2688.07 613.870   2
  -6   3   5 3262.15 756.569   1
  -6  -3   4 5143.80 846.367   2
  -6  -3   4 4466.19 544.815   1
  -6   3   4 4210.83 728.832   2
  -6  -3   3 14499.6 1370.00   2
  -6   3   3 14026.5 1199.72   2
  -6  -3   3 14640.0 901.383   1
  -6   3   2 46906.5 2267.95   2
  -6  -3   2 50778.6 2667.07   2
  -6  -3   1 221.466 335.169   2
  -6   3   1 764.530 335.133   2
   6  -3  -1 753.651 433.518   2
  -6  -3   0 78700.4 2836.01   1
   6   3   0 75775.2 3521.73   2
   6  -3   0 80376.5 3111.85   2
  -6  -3   0 85802.3 3661.57   2
  -6   3   0 80143.2 3075.48   2
   6   3   1 62483.5 3046.37   2
  -6  -3  -1 52650.6 2330.82   1
   6  -3   1 53460.3 2388.25   2
  -6  -3  -1 54224.1 2863.18   2
  -6   3  -1 56649.6 2417.38   2
   6   3   2 25361.4 1916.82   2
   6  -3   2 26519.6 1552.05   2
  -6  -3  -2 27129.3 1631.79   1
  -6  -3  -2 22888.3 1787.68   2
  -6   3  -2 26157.0 1514.31   2
   6  -3   3 74300.8 3006.21   2
  -6  -3  -3 77865.6 3295.66   1
  -6   3  -3 79296.1 3034.03   2
  -6  -3  -3 73467.5 3566.79   2
   6   3   3 77508.6 3679.38   2
   6  -3   4 39434.7 2032.15   2
  -6  -3  -4 35893.3 2191.72   1
  -6  -3  -4 37093.3 2437.30   2
   6   3   4 38542.2 2520.40   2
  -6  -3  -5 67822.4 3336.72   1
   6  -3   5 64993.4 2875.83   2
   6   3   5 62784.0 3451.25   2
  -6  -3  -6 68142.4 3538.11   1
   6   3   6 59886.8 3515.91   2
   6  -3   6 71144.2 3079.42   2
   6   3   7 67890.5 3801.26   2
   6  -3   7 73517.1 3281.82   2
   6  -3   8 3364.86 761.243   2
   6   3   8 3997.84 983.033   2
   6   3   9 66445.0 3968.11   2
   6  -3   9 70057.8 3413.53   2
   6  -3  10 744.099 496.463   2
   6   3  10 526.363 692.996   2
   6   3  11 51823.6 3661.77   2
   6  -3  11 49640.1 2987.30   2
   6   3  12 136.069 653.737   2
  -6  -4  17 34597.8 3315.14   1
  -6   4  17 36244.2 3499.29   1
  -6   4  16 2393.22 1217.90   1
  -6  -4  16 2527.60 1019.16   1
  -6   4  15 31892.8 3073.78   1
  -6  -4  15 32199.9 2983.57   1
  -6   4  14 1584.63 974.425   1
  -6  -4  14-344.888 684.960   1
  -6  -4  13 13219.6 1805.21   1
  -6   4  13 11982.6 1725.88   1
  -6  -4  12 471.772 702.379   1
  -6   4  12 1633.15 886.817   1
  -6  -4  11 2674.37 854.247   1
   6   4 -11 4268.79 922.979   1
  -6   4  11 4840.82 1120.21   1
   6   4 -10 8560.37 1113.22   1
  -6   4  10 9479.94 1412.21   1
  -6  -4  10 8462.76 1257.66   1
  -6  -4   9 56558.6 3018.50   1
  -6   4   9 60741.2 3463.22   1
   6   4  -9 64116.8 2986.70   1
  -6  -4   8 11310.6 1355.50   2
   6   4  -8 9882.05 1028.18   1
  -6  -4   8 10234.4 1145.97   1
  -6  -4   7 115433. 4744.22   2
   6   4  -7 107738. 3885.00   1
  -6  -4   7 110534. 4057.82   1
  -6   4   7 111426. 4674.11   1
  -6  -4   6 908.501 354.949   1
  -6  -4   6 736.930 421.579   2
   6   4  -6 57.8946 236.892   1
  -6   4   6-251.110 470.059   1
  -6  -4   5 32025.9 2144.94   2
  -6  -4   5 31558.6 1525.65   1
  -6   4   5 29958.3 1904.19   2
  -6   4   5 28036.0 2028.80   1
  -6  -4   4 25865.4 1923.32   2
  -6  -4   4 28811.6 1293.13   1
  -6   4   4 26740.9 1725.52   2
  -6  -4   3 51892.4 2815.29   2
  -6  -4   3 54957.8 1862.41   1
  -6   4   3 53033.7 2483.23   2
  -6   4   2 35839.7 1892.36   2
  -6  -4   2 35613.3 1336.35   1
  -6  -4   2 38924.6 2322.64   2
  -6   4   1 154906. 4842.12   2
  -6  -4   1 140533. 4182.17   1
  -6   4   0 4728.49 616.592   2
  -6  -4   0 4203.86 762.936   2
  -6  -4   0 3903.09 472.674   1
  -6  -4  -1 88919.7 3127.80   1
   6  -4   1 84419.9 3168.99   2
  -6  -4  -1 89470.3 3957.43   2
  -6   4  -1 87274.5 3160.38   2
  -6  -4  -2 7409.75 791.762   1
   6   4   2 7959.51 1135.16   2
   6  -4   2 7150.75 738.486   2
  -6   4  -2 7174.50 724.660   2
  -6  -4  -2 5980.66 946.325   2
   6   4   3 4541.32 909.508   2
   6  -4   3 4930.77 629.854   2
  -6  -4  -3 3918.09 662.758   1
  -6   4  -3 3848.68 559.390   2
  -6  -4  -3 4598.61 837.046   2
   6   4   4 1366.83 625.888   2
   6  -4   4 1457.16 394.276   2
  -6  -4  -4 913.565 445.350   1
   6   4   5 1509.54 754.079   2
   6  -4   5 841.692 358.143   2
  -6  -4  -5 1322.58 538.007   1
   6   4   6 3462.84 867.249   2
   6  -4   6 3722.22 641.102   2
  -6  -4  -6 2897.99 724.158   1
   6  -4   7 1540.85 482.248   2
   6   4   7 759.737 564.038   2
   6   4   8 15326.1 1891.76   2
   6  -4   8 19699.4 1508.41   2
   6   4   9 30744.7 2693.41   2
   6  -4   9 32586.6 2065.62   2
   6   4  10 29816.7 2780.71   2
   6  -4  10 32815.2 2145.33   2
   6   4  11 84828.1 4957.81   2
   6   4  12 46620.4 3671.00   2
  -6  -5  17 30850.8 3168.88   1
  -6   5  17 29808.5 3197.02   1
  -6   5  16 6359.89 1615.85   1
  -6  -5  16 7861.78 1687.94   1
  -6  -5  15 64092.8 4284.28   1
  -6   5  15 69082.2 4612.60   1
  -6  -5  14 13293.4 1784.20   1
  -6   5  14 15976.3 2191.00   1
  -6   5  13 187174. 7774.88   1
  -6  -5  13 173136. 7255.54   1
  -6   5  12 16218.4 1988.57   1
  -6  -5  12 12862.8 1704.31   1
  -6   5  11 259306. 9662.94   1
  -6  -5  11 268807. 9282.27   1
  -6   5  10 46512.9 3119.60   1
  -6  -5  10 43373.0 2707.97   1
   6   5 -10 45038.0 2579.44   1
  -6   5   9 137900. 5958.42   1
  -6  -5   9 148606. 5514.52   1
   6   5  -9 153886. 5305.18   1
  -6  -5   8 37799.4 2167.42   1
   6   5  -8 37026.6 2017.11   1
  -6   5   8 35057.1 2543.93   1
  -6  -5   7 71926.8 3574.42   2
  -6  -5   7 66104.9 2854.08   1
   6   5  -7 70574.2 2779.81   1
  -6   5   7 65565.1 3497.86   1
  -6  -5   6 4824.74 914.853   2
   6   5  -6 3058.48 750.226   2
   6   5  -6 3839.39 515.133   1
  -6  -5   6 3639.41 532.659   1
  -6   5   6 3762.04 821.710   1
  -6  -5   5 2965.44 719.682   2
  -6  -5   5 2628.59 395.602   1
  -6   5   5 1870.71 650.127   1
  -6  -5   4 22378.3 1007.64   1
  -6  -5   4 22350.9 1800.97   2
  -6   5   4 21284.9 1507.18   2
  -6  -5   3 7086.22 1028.33   2
  -6   5   3 7703.29 846.046   2
  -6  -5   2 1680.60 550.571   2
  -6   5   2 1754.68 425.020   2
  -6   5   1 14080.4 1053.66   2
  -6  -5   1 14052.3 583.072   1
  -6  -5   1 12984.6 601.138   1
  -6   5   0 1809.48 402.347   2
  -6  -5   0 649.882 198.675   1
  -6  -5   0 1514.70 585.100   2
   6   5   1 74988.2 3692.97   2
  -6  -5  -1 78250.0 2694.24   1
  -6  -5  -1 75483.5 3655.60   2
  -6   5  -1 74995.1 2737.59   2
   6   5   2 3409.31 779.870   2
  -6  -5  -2 4910.68 633.479   1
   6  -5   2 3791.68 493.678   2
  -6   5  -2 5108.49 568.232   2
  -6  -5  -2 4704.67 927.706   2
   6  -5   3 56612.5 2232.13   2
  -6  -5  -3 56451.3 2582.85   1
   6   5   3 58260.7 3267.29   2
   6  -5   4 12819.5 939.713   2
  -6  -5  -4 12893.0 1227.25   1
   6   5   4 12822.0 1542.96   2
   6  -5   5 54997.9 2305.93   2
  -6  -5  -5 61558.6 3059.06   1
   6   5   5 58361.7 3453.98   2
   6   5   6-155.688 561.211   2
   6  -5   6 664.739 289.915   2
  -6  -5  -6 561.690 468.040   1
   6  -5   7 23602.7 1470.91   2
  -6  -5  -7 21938.3 1991.51   1
   6   5   7 22281.7 2192.25   2
   6  -5   8 315.572 256.223   2
   6   5   8-662.148 686.345   2
   6   5   9 19322.6 2224.15   2
   6  -5   9 22397.3 1562.32   2
   6   5  10 1400.89 753.869   2
   6   5  11 10761.4 1805.58   2
  -6   6  16-1017.09 905.709   1
  -6  -6  16 2006.19 1004.54   1
  -6   6  15 21040.5 2548.86   1
  -6  -6  15 26019.3 2688.45   1
  -6   6  14 1787.75 846.370   1
  -6  -6  14 630.674 735.820   1
  -6  -6  13 8949.51 1371.67   1
  -6   6  13 9044.01 1594.73   1
  -6  -6  12 2853.21 989.401   1
  -6   6  12 2452.67 1055.16   1
   6   6 -11 3588.02 817.133   1
  -6   6  11 1865.13 910.271   1
  -6  -6  11 3451.86 1013.80   1
   6   6 -10 16296.1 1509.57   1
  -6   6  10 17368.3 2022.46   1
  -6  -6  10 17317.6 1689.97   1
  -6  -6   9 50636.0 2746.54   1
   6   6  -9 46276.1 2476.59   1
  -6   6   9 52042.5 3262.75   1
  -6   6   8 4144.38 943.009   1
   6   6  -8 3260.09 607.000   1
  -6  -6   8 3506.10 680.535   1
   6   6  -7 28314.9 2186.69   2
  -6   6   7 30195.0 2317.63   1
   6   6  -7 30846.2 1622.51   1
  -6  -6   7 30959.2 1749.99   1
  -6  -6   6 7328.10 1112.00   2
   6   6  -6 5943.65 987.022   2
   6   6  -6 7568.63 673.217   1
  -6   6   6 6763.96 1107.55   1
  -6  -6   6 8252.30 770.393   1
  -6  -6   5 1911.52 630.275   2
   6   6  -5 1778.89 595.205   2
  -6   6   5 2542.67 696.382   1
  -6  -6   5 1909.78 315.612   1
  -6  -6   4 608.793 401.470   2
   6   6  -4 822.839 509.820   2
  -6   6   4 968.519 389.931   2
  -6   6   3 7871.82 865.822   2
  -6  -6   3 9330.98 1170.33   2
  -6  -6   2 381.566 399.852   2
  -6   6   2-211.698 262.370   2
  -6   6   1 72742.4 2756.10   2
  -6  -6   1 70946.5 3547.49   2
  -6   6   0-58.3476 242.770   2
  -6  -6   0 209.622 406.510   2
  -6  -6  -1 87343.8 2736.71   1
  -6   6  -1 86711.4 2868.70   2
   6   6   2 845.598 588.980   2
  -6  -6  -2 851.024 281.545   1
  -6   6  -2 991.843 270.624   2
   6   6   3 7821.62 1213.23   2
  -6  -6  -3 8227.75 849.553   1
   6  -6   4 452.142 201.234   2
  -6  -6  -4 89.1172 251.797   1
   6   6   5 3463.33 970.088   2
   6  -6   5 3530.78 426.200   2
  -6  -6  -5 2899.26 671.802   1
   6   6   6 343.157 602.497   2
   6  -6   6 747.503 266.731   2
  -6  -6  -6 1248.78 477.240   1
   6  -6   7 3450.52 481.169   2
  -6  -6  -7 5169.01 886.743   1
   6   6   7 3471.29 999.535   2
   6   6   8 807.064 801.036   2
   6   6   9 45968.2 3517.64   2
   6   6  10 3001.70 1090.68   2
   6   6  11 119586. 6359.45   2
  -6   7  16 17432.3 2520.58   1
  -6  -7  16 14961.2 2114.99   1
  -6   7  15 56416.3 4172.12   1
  -6  -7  15 46400.6 3630.47   1
  -6   7  14 25390.8 2679.43   1
  -6  -7  14 21182.9 2294.23   1
  -6   7  13 104455. 5627.55   1
  -6  -7  13 105127. 5202.22   1
  -6  -7  12 8549.69 1378.21   1
  -6   7  12 6323.14 1418.34   1
   6   7 -11 227258. 7574.88   1
  -6   7  11 220570. 8538.75   1
  -6  -7  11 209730. 7729.96   1
   6   7 -10 28861.8 1984.41   1
  -6   7  10 30745.7 2616.25   1
  -6  -7  10 26684.6 2081.95   1
  -6  -7   9 146310. 5440.52   1
  -6   7   9 136781. 6138.65   1
  -6  -7   8 75546.6 3199.99   1
  -6   7   8 79858.7 4106.37   1
   6   7  -8 67142.4 2906.72   1
  -6   7   7 857.040 648.280   1
   6   7  -7 2455.34 455.182   1
  -6  -7   7 2105.61 460.262   1
   6   7  -7 1837.77 664.855   2
   6   7  -6 121624. 5169.42   2
  -6   7   6 121162. 5275.57   1
   6   7  -6 126963. 3799.92   1
   6   7  -5 20494.7 1821.49   2
  -6   7   5 17195.5 1743.21   1
  -6  -7   4-278.411 471.305   2
   6   7  -4-218.005 430.129   2
  -6  -7   3 1252.67 595.568   2
   6   7  -3 824.196 521.384   2
  -6   7   3 1540.51 452.561   2
   6   7  -2 54999.8 3175.45   2
  -6   7   2 59394.1 2496.08   2
  -6  -7   2 60013.8 3242.73   2
   6   7  -1 214.450 534.785   2
  -6   7   1 757.489 320.693   2
  -6   7   0 20429.9 1129.61   2
   6   7   0 21418.9 1919.07   2
   6   7   1 33347.2 2474.06   2
  -6  -7  -1 36333.0 1270.14   1
  -6   7  -1 36614.8 1466.21   2
   6   7   2 4030.43 912.517   2
  -6  -7  -2 3686.75 479.615   1
  -6  -7  -3 179832. 5513.59   1
   6   7   3 172140. 6876.66   2
   6   7   4 8848.99 1391.97   2
  -6  -7  -4 8614.23 957.230   1
  -6  -7  -5 81323.0 3593.27   1
   6   7   5 88322.5 4617.75   2
   6   7   6 5678.21 1181.79   2
  -6  -7  -6 4978.50 916.203   1
  -6  -7  -7 32379.2 2343.77   1
   6   7   7 27699.3 2662.40   2
   6   7   8 7254.10 1460.24   2
   6   7   9 28548.4 2833.43   2
   6   7  10 24503.4 2692.03   2
   6   7  11 6097.75 1632.12   2
  -6   8  16 3337.51 1317.45   1
  -6   8  15 27032.4 2929.77   1
  -6   8  14 882.707 735.055   1
  -6   8  13 2802.73 985.087   1
  -6   8  12 11958.0 1863.10   1
   6   8 -11 5376.83 1005.91   1
  -6   8  11 5282.18 1195.46   1
  -6   8  10 46766.9 3405.29   1
   6   8 -10 51423.4 2727.09   1
   6   8  -9 56786.5 2748.30   1
  -6   8   9 59851.8 3714.84   1
  -6   8   8 14192.4 1748.73   1
   6   8  -8 12215.5 1078.12   1
   6   8  -7 63271.6 3531.94   2
  -6   8   7 71859.7 3909.25   1
   6   8  -7 67088.6 2570.24   1
   6   8  -6 4185.95 929.399   2
   6   8  -6 4812.52 486.595   1
  -6   8   6 3499.38 934.576   1
   6   8  -5 142587. 5794.13   2
  -6   8   5 149101. 6004.79   1
   6   8  -4 15265.4 1632.40   2
   6   8  -3 175027. 6482.02   2
  -6   8   3 163820. 5408.37   2
   6   8  -2 5816.59 1067.66   2
  -6   8   2 6395.64 744.810   2
   6   8  -1 127165. 5393.23   2
  -6   8   1 128385. 4077.04   2
  -6   8   0 146.637 211.102   2
   6   8   0 744.336 686.813   2
   6   8   1 39845.6 2810.75   2
  -6   8  -1 44069.8 1487.95   2
   6   8   2 10385.5 1454.73   2
  -6  -8  -2 10970.5 716.320   1
   6   8   3 6957.52 1264.81   2
  -6  -8  -3 7795.70 766.453   1
   6   8   4 2921.64 958.258   2
  -6  -8  -4 2879.59 577.065   1
   6   8   5-99.2943 763.168   2
  -6  -8  -5 69.2262 364.795   1
   6   8   6 17314.2 2128.98   2
  -6  -8  -6 16375.8 1533.78   1
   6   8   7 3636.19 1024.77   2
   6   8   8 52120.4 3850.95   2
   6   8   9 12699.9 1954.28   2
   6   8  10 36763.0 3411.04   2
  -6   9  15-693.639 772.131   1
  -6   9  14 18861.8 2331.60   1
  -6   9  13-1913.51 897.540   1
  -6   9  12 13552.7 1884.08   1
  -6   9  11 5416.82 1207.94   1
   6   9 -11 4938.83 950.192   1
  -6   9  10 52250.6 3667.69   1
   6   9 -10 57167.8 2894.90   1
   6   9  -9 17398.4 1397.53   1
  -6   9   9 19361.8 2133.16   1
   6   9  -8 123539. 4193.73   1
   6   9  -8 111704. 5187.02   2
  -6   9   8 120811. 5617.19   1
   6   9  -7 4975.58 625.360   1
   6   9  -7 4747.04 1015.19   2
  -6   9   7 5305.29 1210.42   1
   6   9  -6 62855.6 3543.40   2
  -6   9   6 55098.7 3511.23   1
   6   9  -6 62371.7 2086.72   1
   6   9  -5 218.431 568.335   2
  -6   9   5 68.5511 574.521   1
   6   9  -4 4023.85 1058.05   2
   6   9  -3 9621.64 1386.68   2
   6   9  -2 39009.4 2723.03   2
  -6   9   2 36901.6 1875.01   2
   6   9  -1 1041.91 758.579   2
  -6   9   1 1112.93 340.248   2
  -6   9   0 31475.4 1311.58   2
   6   9   0 29699.1 2415.19   2
   6   9   1 43158.8 3006.07   2
   6   9   2 63120.2 3769.54   2
  -6  -9  -3 81809.2 2839.22   1
   6   9   3 76685.5 4369.39   2
  -6  -9  -4 89452.1 3364.14   1
   6   9   4 85866.4 4777.37   2
   6   9   5 49815.2 3576.46   2
   6   9   6 25747.7 2590.06   2
   6   9   7 64933.0 4316.40   2
   6   9   8 3491.98 1237.13   2
   6   9   9 47738.2 3883.29   2
   6   9  10 1886.21 1072.82   2
  -6  10  14 2499.52 1011.28   1
  -6  10  13 881.638 713.334   1
  -6  10  12 1280.29 850.437   1
  -6  10  11 13434.1 1877.78   1
  -6  10  10 407.192 705.677   1
   6  10  -9 30642.3 1887.51   1
  -6  10   9 29568.7 2687.41   1
  -6  10   8 4919.69 1130.47   1
   6  10  -8 6397.01 773.693   1
   6  10  -8 5612.60 1153.49   2
   6  10  -7 32545.9 2542.81   2
  -6  10   7 32374.4 2736.22   1
   6  10  -7 34741.1 1624.53   1
   6  10  -6 162966. 6592.06   2
  -6  10   6 159149. 6821.84   1
   6  10  -6 168755. 4558.89   1
   6  10  -5 76171.0 4016.02   2
  -6  10   5 69788.8 4034.22   1
   6  10  -4 367839. 11695.8   2
   6  10  -3 81538.9 4201.12   2
   6  10  -2 189354. 7307.87   2
  -6  10   2 195580. 5903.55   2
   6  10  -1 68014.1 3848.68   2
  -6  10   1 68761.1 2526.94   2
  -6  10   0 49534.5 1684.11   2
   6  10   0 47761.2 3216.59   2
   6  10   1 6324.63 1224.59   2
   6  10   2 2804.80 952.841   2
   6  10   3 631.712 600.496   2
   6  10   4 10157.0 1646.91   2
   6  10   5-862.535 890.836   2
   6  10   6 4039.92 1269.83   2
   6  10   7 4808.08 1470.03   2
   6  10   8 24967.7 2770.29   2
   6  10   9 1384.35 1004.04   2
  -6  11  14 2187.91 1112.47   1
  -6  11  13 107.461 543.825   1
  -6  11  12-1162.43 792.115   1
  -6  11  11-55.4957 576.888   1
  -6  11  10 6911.91 1437.08   1
  -6  11   9 3335.86 1117.56   1
   6  11  -8 68330.7 3868.01   2
  -6  11   8 65746.4 4158.07   1
   6  11  -7 10511.7 824.022   1
   6  11  -7 9511.60 1471.69   2
  -6  11   7 8803.45 1468.96   1
   6  11  -6 56771.2 3492.98   2
  -6  11   6 51574.7 3550.48   1
   6  11  -6 55663.6 1807.69   1
   6  11  -5 2211.05 813.481   2
  -6  11   5 2385.99 976.651   1
   6  11  -4 8242.24 1375.91   2
   6  11  -3 6626.97 1233.99   2
   6  11  -2 17917.9 1920.87   2
  -6  11   2 18072.1 1259.75   2
   6  11  -1 8076.42 1436.01   2
  -6  11   1 7684.55 695.229   2
  -6  11   0 40765.2 1339.62   2
   6  11   0 47357.7 3221.09   2
  -6  11   0 44252.3 1367.66   2
   6  11   1 3060.04 1000.52   2
   6  11   2 103677. 5298.48   2
   6  11   3-187.350 994.920   2
   6  11   4 142843. 6711.50   2
   6  11   5 15164.1 2119.07   2
   6  11   6 149099. 7223.93   2
   6  11   7 12263.3 1966.18   2
   6  11   8 55188.8 4264.27   2
  -6  12  13-1397.03 946.788   1
  -6  12  12-1237.08 862.125   1
  -6  12  11 15747.5 2213.38   1
  -6  12  10 16688.1 2141.41   1
  -6  12   9 24280.9 2554.94   1
   6  12  -8 27058.6 2377.62   2
  -6  12   8 25612.2 2604.46   1
   6  12  -7 5467.84 1164.48   2
  -6  12   7 6051.35 1381.38   1
   6  12  -6 140693. 6094.08   2
  -6  12   6 134578. 6299.80   1
   6  12  -5 701.085 680.211   2
  -6  12   5-187.388 693.811   1
   6  12  -4 232254. 8586.03   2
   6  12  -3 3830.53 1046.49   2
   6  12  -2 154954. 6746.78   2
  -6  12   2 169076. 5234.01   2
   6  12  -1 6371.91 1298.59   2
  -6  12   1 6160.74 604.628   2
  -6  12   1 5519.33 594.508   2
   6  12   0 33961.1 2822.51   2
   6  12   1 2866.00 1002.22   2
   6  12   2 1270.22 747.308   2
   6  12   3 1594.93 953.962   2
   6  12   4 1183.43 790.457   2
   6  12   5 1632.59 959.885   2
   6  12   6 3784.65 1202.86   2
   6  12   7 4164.20 1327.87   2
   6  12   8 17747.8 2470.29   2
  -6  13  12 12710.1 1988.77   1
  -6  13  11 423.247 792.012   1
  -6  13  10 47159.4 3759.75   1
  -6  13   9 4493.51 1157.38   1
   6  13  -8 29384.5 2544.30   2
  -6  13   8 27793.6 2761.14   1
   6  13  -7 19446.9 2032.03   2
  -6  13   7 15478.5 2064.09   1
   6  13  -6 19473.2 2075.46   2
  -6  13   6 21249.2 2342.47   1
   6  13  -5 6469.27 1216.89   2
  -6  13   5 5915.82 1315.79   1
   6  13  -4 479.788 649.944   2
   6  13  -3 3003.69 995.426   2
   6  13  -2 18931.5 2102.09   2
  -6  13   2 18758.3 1308.03   2
   6  13  -1 4051.45 1109.30   2
  -6  13   1 4153.94 506.312   2
   6  13   0 27121.4 2577.72   2
   6  13   1 743.050 691.878   2
   6  13   2 33934.6 3037.07   2
   6  13   3 9236.63 1695.77   2
   6  13   4 51885.1 3981.62   2
   6  13   5 8103.78 1636.75   2
   6  13   6 43309.7 3766.68   2
   6  13   7 22173.2 2756.24   2
  -6  14  11 11986.5 2058.92   1
  -6  14  10 3283.35 1289.41   1
  -6  14   9 55803.4 4147.29   1
  -6  14   8 3456.61 1189.47   1
   6  14  -8 2819.97 926.384   2
   6  14  -7 44471.0 3237.80   2
  -6  14   7 44611.6 3557.29   1
   6  14  -6 14261.7 1803.88   2
  -6  14   6 16546.0 2127.17   1
   6  14  -5 15170.1 1900.14   2
  -6  14   5 14868.8 1995.24   1
   6  14  -4 37073.3 2977.91   2
  -6  14   4 41301.9 2508.25   2
   6  14  -3 16973.8 2017.24   2
  -6  14   3 18384.5 1486.04   2
   6  14  -2 31403.9 2780.64   2
   6  14  -1 30374.1 2769.01   2
   6  14   0 5737.10 1194.93   2
   6  14   1 7355.68 1434.32   2
   6  14   2 7932.20 1512.18   2
   6  14   3-570.896 795.953   2
   6  14   4 601.334 796.761   2
   6  14   5-952.995 896.479   2
  -6  15   9 14664.3 2174.60   1
   6  15  -8 36473.9 2960.01   2
  -6  15   8 33084.5 3163.39   1
  -6  15   7 4211.77 1254.68   1
   6  15  -7 4818.33 1193.53   2
   6  15  -6 8430.24 1450.74   2
  -6  15   6 11400.9 1812.35   1
   6  15  -5 206.271 551.948   2
  -6  15   5-316.474 471.476   2
  -6  15   5-1324.75 838.397   1
   6  15  -4-351.416 585.088   2
  -6  15   4 789.726 567.553   1
  -6  15   4 133.266 319.040   2
   6  15  -3 4015.29 1127.53   2
   6  15  -2 1095.46 748.678   2
   6  15  -1 1657.92 740.454   2
   6  15   0 16385.4 2141.76   2
   6  15   1 11221.8 1809.25   2
   6  15   2 35965.5 3280.85   2
   6  15   3 25693.9 2885.20   2
   6  15   4 28094.7 3087.01   2
  -6  16   7 8377.07 1705.55   1
   6  16  -7 10247.9 1647.61   2
  -6  16   7 10350.6 1597.48   2
   6  16  -6 547.746 544.725   2
  -6  16   6 438.689 551.014   2
  -6  16   6-351.087 689.700   1
   6  16  -5 643.013 570.607   2
  -6  16   5-164.952 526.946   1
   6  16  -4-1341.59 818.686   2
  -6  16   4 513.196 678.218   1
   6  16  -3 3925.24 1100.90   2
   6  16  -2 122.944 702.805   2
   6  16  -1 13590.4 1898.00   2
   6  16   0 4670.84 1272.78   2
   6  16   1 22436.8 2523.38   2
   6  16   2 1026.38 1037.12   2
  -7   0  17 33845.0 3311.42   1
  -7   0  16 829.786 851.656   1
  -7   0  15 31525.4 2963.33   1
  -7   0  14-202.116 744.495   1
  -7   0  13 401.930 581.873   1
  -7   0  12 29.7004 578.287   1
  -7   0  11 2635.99 833.854   1
  -7   0  10 271.287 532.002   1
   7   0 -10 368.537 460.375   1
  -7   0   9 65416.9 3426.88   1
  -7   0   8 1586.30 661.762   1
  -7   0   7 287990. 8952.17   1
  -7   0   7 297937. 9379.78   2
  -7   0   6 2963.75 755.236   1
  -7   0   6 2535.90 718.032   2
  -7   0   5 617025. 16784.6   2
  -7   0   5 602569. 16246.6   1
  -7   0   4-354.825 556.769   2
   7   0  -4 1307.31 690.481   2
  -7   0   4 591.984 493.013   1
  -7   0   3 553090. 15492.7   2
   7   0  -3 578741. 15646.5   2
  -7   0   2-308.741 516.058   2
   7   0  -2 133.426 571.564   2
   7   0  -1 157098. 5461.42   2
  -7   0   1 143230. 5317.17   2
  -7   0   0 350.037 412.490   2
   7   0   0 401.042 486.915   2
   7   0   1 40278.2 2392.88   2
  -7   0  -1 45478.5 2472.55   2
   7   0   2-364.776 407.930   2
  -7   0  -2-717.919 391.157   2
   7   0   3 2379.19 665.308   2
  -7   0  -3 2378.10 617.016   2
  -7   0  -3 1307.23 490.108   1
   7   0   4 722.107 540.147   2
  -7   0  -4 76.0427 309.668   2
  -7   0  -4 348.679 440.070   1
   7   0   5 1088.22 511.901   2
   7   0   6 192.280 459.305   2
   7   0   7-349.132 626.068   2
   7   0   8 98.7875 526.207   2
   7   0   9 24969.8 2233.30   2
   7   0  10 622.133 537.092   2
   7   0  11 30351.0 2604.21   2
  -7  -1  17 14098.4 2175.60   1
  -7   1  17 13390.1 2139.40   1
  -7   1  16 8869.20 1752.85   1
  -7  -1  16 8137.30 1656.83   1
  -7  -1  15 41841.7 3425.80   1
  -7   1  15 41985.5 3488.10   1
  -7   1  14 3262.54 1044.79   1
  -7  -1  14 1423.46 884.517   1
  -7   1  13 54796.7 3679.04   1
  -7  -1  13 54155.2 3591.06   1
  -7  -1  12 5247.14 1000.66   1
  -7   1  12 4338.52 1109.97   1
  -7   1  11 54190.8 3340.12   1
  -7  -1  11 52425.5 3236.28   1
  -7   1  10-88.2949 500.713   1
   7   1 -10-186.200 388.242   1
  -7  -1  10-267.427 569.872   1
  -7   1   9 77889.6 3763.08   1
  -7  -1   9 75666.8 3621.00   1
   7   1  -9 65268.2 3298.34   1
  -7   1   8 4525.78 949.491   1
  -7  -1   8 3541.36 787.456   1
  -7  -1   7 118353. 4550.03   1
  -7  -1   7 125408. 5055.79   2
  -7   1   7 125961. 5006.30   2
  -7   1   7 114478. 4687.33   1
  -7   1   6 1573.69 764.461   1
  -7  -1   6 2967.09 750.736   1
  -7  -1   6 2576.94 785.213   2
  -7   1   6 1958.95 732.064   2
  -7  -1   5 16990.4 1591.38   2
  -7   1   5 20569.6 1673.47   2
  -7   1   5 16848.4 1478.53   1
  -7  -1   5 15956.5 1316.58   1
  -7  -1   4 4681.85 971.119   2
  -7   1   4 4914.33 924.975   2
   7   1  -4 6440.15 1090.44   2
  -7  -1   4 5428.76 796.197   1
  -7  -1   3 43668.2 2497.76   2
  -7   1   3 40137.5 2331.97   2
   7   1  -3 37269.4 2393.22   2
   7  -1  -3 42181.5 2409.45   2
  -7  -1   2 1406.06 609.976   2
  -7   1   2 2384.92 779.120   2
   7   1  -2 1475.97 751.730   2
   7  -1  -2 847.299 597.340   2
   7   1  -1 155468. 5803.86   2
   7  -1  -1 172546. 5788.07   2
  -7  -1   1 164535. 5850.85   2
  -7   1   1 169896. 5734.19   2
  -7  -1   0 157.047 293.670   2
  -7   1   0 41.0517 310.500   2
   7   1   0 407.402 450.803   2
   7  -1   0 486.798 468.153   2
   7   1   1 30010.2 2061.07   2
   7  -1   1 30134.9 1963.81   2
  -7  -1  -1 30030.9 2049.52   2
  -7   1  -1 33140.7 2009.51   2
   7   1   2 8495.38 1109.19   2
  -7  -1  -2 6730.52 929.603   1
   7  -1   2 7235.95 961.071   2
  -7  -1  -2 8059.58 1073.20   2
  -7   1  -2 6488.43 899.780   2
  -7   1  -3 2119.50 663.412   1
   7   1   3 2616.49 668.786   2
   7  -1   3 1569.38 534.279   2
  -7   1  -3 2362.47 601.789   2
  -7  -1  -3 2541.78 616.675   2
  -7  -1  -3 2890.26 686.187   1
   7   1   4 879.361 546.678   2
   7  -1   4 2588.24 701.753   2
  -7  -1  -4 597.763 401.489   1
  -7   1  -4 832.201 495.039   1
  -7   1  -4 2002.65 564.181   2
  -7  -1  -4 823.709 472.235   2
   7  -1   5 77936.9 3621.94   2
  -7  -1  -5 76430.8 3844.28   1
   7   1   5 70392.6 3681.95   2
   7   1   6 3749.23 915.619   2
   7  -1   6 5536.31 899.183   2
   7   1   7 82256.8 4211.92   2
   7  -1   7 80992.4 3946.17   2
   7   1   8 8831.92 1341.27   2
   7  -1   8 7932.00 1190.28   2
   7   1   9 13640.8 1677.02   2
   7  -1   9 12759.4 1509.68   2
   7   1  10-1135.07 659.687   2
   7  -1  10-303.392 613.670   2
   7   1  11 65.0495 605.829   2
   7  -1  11 500.002 621.629   2
  -7  -2  17 41687.7 3645.00   1
  -7   2  17 39126.2 3593.63   1
  -7  -2  16 1003.61 925.820   1
  -7   2  16 1420.34 923.784   1
  -7  -2  15 46850.7 3598.23   1
  -7   2  15 44415.2 3608.34   1
  -7   2  14 960.963 924.684   1
  -7  -2  14-366.858 986.541   1
  -7  -2  13 5168.95 1178.64   1
  -7   2  13 6820.35 1368.25   1
  -7  -2  12 974.559 765.220   1
  -7   2  12 2225.08 847.578   1
  -7  -2  11 5090.07 1035.50   1
  -7   2  11 5342.70 1178.91   1
  -7   2  10 20559.3 1977.22   1
  -7  -2  10 21317.0 1889.65   1
   7   2 -10 24680.1 1887.58   1
  -7   2   9 34858.0 2519.43   1
  -7  -2   9 40884.2 2500.69   1
   7   2  -9 38515.3 2313.86   1
  -7  -2   8 157754. 5694.30   1
  -7   2   8 165514. 6124.23   1
  -7  -2   7 118220. 4485.36   1
  -7  -2   7 124151. 5084.33   2
  -7   2   7 119771. 4937.15   2
  -7   2   7 125061. 4942.47   1
  -7  -2   6 108491. 3867.69   1
  -7  -2   6 96372.7 4314.30   2
  -7   2   6 93215.8 4145.21   2
  -7   2   6 93539.5 4111.57   1
  -7  -2   5 289711. 9138.25   2
  -7   2   5 299530. 8960.68   2
  -7   2   5 282858. 8805.10   1
  -7  -2   5 277614. 8186.32   1
  -7  -2   4 68742.0 3418.34   2
  -7   2   4 71864.6 3304.03   2
   7   2  -4 70784.6 3466.10   2
  -7  -2   4 71748.0 2823.98   1
  -7  -2   3 228253. 7524.82   2
  -7   2   3 227265. 7226.47   2
   7   2  -3 216834. 7436.37   2
  -7  -2   3 227437. 6595.51   1
  -7   2   2 81300.2 3481.67   2
   7   2  -2 79367.7 3729.52   2
   7  -2  -2 82151.1 3513.62   2
  -7  -2   2 91242.2 3898.62   2
  -7   2   1 40744.3 2233.13   2
   7   2  -1 39755.8 2467.83   2
   7  -2  -1 39678.6 2249.07   2
  -7  -2   1 45992.8 2586.48   2
   7  -2   0 201244. 6592.00   2
  -7  -2   0 212768. 7076.34   2
  -7   2   0 193317. 6478.42   2
   7   2   1 526.411 553.672   2
   7  -2   1 849.316 481.104   2
  -7  -2  -1 593.452 345.863   1
  -7  -2  -1 1170.71 538.327   2
  -7   2  -1 1181.52 436.345   2
   7   2   2 61917.7 3247.10   2
   7  -2   2 57463.0 2788.31   2
  -7  -2  -2 60928.5 2902.43   1
  -7  -2  -2 62106.3 3188.55   2
  -7   2  -2 61127.8 2828.90   2
   7   2   3 2733.88 785.963   2
   7  -2   3 3670.79 710.257   2
  -7  -2  -3 2883.84 662.466   1
  -7   2  -3 3365.73 647.904   2
  -7  -2  -3 4599.77 879.784   2
   7   2   4 3458.64 743.770   2
   7  -2   4 3269.51 715.808   2
  -7  -2  -4 3878.35 789.560   1
   7   2   5 7241.07 1200.08   2
  -7  -2  -5 6692.65 1071.31   1
   7  -2   5 7763.50 1042.17   2
   7   2   6 5892.60 1127.88   2
   7  -2   6 6207.78 967.776   2
   7   2   7 16290.7 1828.04   2
   7  -2   7 17912.0 1643.42   2
   7   2   8 2203.24 785.340   2
   7  -2   8 2511.35 727.901   2
   7   2   9 49215.2 3432.09   2
   7  -2   9 56084.8 3205.75   2
   7   2  10 7045.25 1393.21   2
   7  -2  10 8113.58 1212.71   2
   7   2  11 27777.2 2669.55   2
  -7   3  17 3546.31 1311.16   1
  -7  -3  17 3103.19 1230.49   1
  -7  -3  16 24997.4 2698.53   1
  -7   3  16 21328.4 2582.67   1
  -7  -3  15 24895.2 2608.95   1
  -7   3  15 28618.9 2911.98   1
  -7   3  14 17460.5 2108.71   1
  -7  -3  14 14957.9 1961.56   1
  -7  -3  13 92819.0 4858.22   1
  -7   3  13 94798.3 5098.98   1
  -7  -3  12 46839.1 3163.74   1
  -7   3  12 51157.3 3415.37   1
  -7   3  11 72826.3 4152.30   1
   7   3 -11 80490.6 3821.97   1
  -7  -3  11 80588.8 4070.19   1
  -7   3  10 30739.0 2468.42   1
   7   3 -10 32289.8 2160.13   1
  -7  -3  10 32871.1 2319.44   1
  -7   3   9 62451.1 3493.52   1
  -7  -3   9 56328.1 3037.79   1
   7   3  -9 61906.0 2984.12   1
  -7   3   8 72.8239 584.135   1
   7   3  -8 1240.49 473.480   1
  -7  -3   8 359.610 419.069   1
  -7  -3   7 66974.9 2963.98   1
  -7   3   7 68103.7 3408.80   2
  -7   3   7 64093.5 3382.42   1
  -7  -3   6 12582.1 1402.84   2
  -7  -3   6 12468.8 1085.01   1
  -7   3   6 13245.2 1371.58   2
  -7   3   6 9395.55 1223.40   1
  -7  -3   5 9285.57 882.802   1
  -7  -3   5 10761.4 1281.60   2
  -7   3   5 10979.4 1169.18   2
  -7   3   5 9193.75 1159.56   1
  -7  -3   4 11821.8 1335.54   2
  -7   3   4 10549.4 1150.55   2
  -7  -3   4 8930.57 812.070   1
  -7  -3   3 46959.3 2725.68   2
  -7   3   3 43616.3 2401.34   2
   7   3  -3 47869.6 2755.52   2
  -7  -3   3 47435.2 1969.22   1
  -7   3   2 41598.5 2227.38   2
   7   3  -2 39240.6 2499.70   2
  -7  -3   2 38989.6 2457.47   2
  -7   3   1 117715. 4266.38   2
   7   3  -1 123688. 4871.30   2
   7  -3  -1 112092. 4256.62   2
  -7  -3   1 111350. 4693.79   2
  -7   3   0 1792.14 560.825   2
   7   3   0 801.138 635.746   2
  -7  -3   0 568.225 320.898   1
   7  -3   0 555.877 416.007   2
  -7  -3   0 1442.56 555.990   2
   7   3   1 188299. 6937.40   2
  -7  -3  -1 197858. 6236.91   1
   7  -3   1 201818. 6388.73   2
  -7  -3  -1 213520. 7141.56   2
  -7   3  -1 202334. 6326.23   2
   7   3   2 25253.1 2029.76   2
   7  -3   2 23095.5 1617.17   2
  -7  -3  -2 24428.4 1645.44   1
  -7  -3  -2 24260.2 1939.80   2
  -7   3  -2 23986.4 1588.98   2
   7   3   3 78286.4 3920.67   2
   7  -3   3 81527.2 3361.55   2
  -7  -3  -3 82739.4 3570.59   1
  -7   3  -3 80272.7 3308.25   2
   7  -3   4 82972.3 3481.07   2
  -7  -3  -4 86051.6 3801.06   1
   7   3   4 79103.0 4056.11   2
  -7  -3  -5 74391.4 3701.12   1
   7  -3   5 75290.0 3347.73   2
   7   3   5 77928.2 4055.04   2
   7  -3   6 59155.1 2905.18   2
   7   3   6 49266.9 3228.01   2
   7  -3   7 30022.2 2039.69   2
   7   3   7 27357.7 2434.66   2
   7  -3   8 16260.3 1529.11   2
   7   3   8 14870.4 1851.28   2
   7   3   9 2253.40 959.270   2
   7  -3   9 3600.25 801.458   2
   7   3  10 8987.57 1533.76   2
   7   3  11 1794.02 939.795   2
  -7  -4  17 7025.53 1574.60   1
  -7   4  17 9253.39 1868.18   1
  -7  -4  16 10269.9 1803.88   1
  -7   4  16 10910.5 1922.94   1
  -7   4  15 6635.80 1482.79   1
  -7  -4  15 5822.87 1332.71   1
  -7  -4  14 4597.53 1089.70   1
  -7   4  14 3292.04 1174.97   1
  -7  -4  13 2301.52 860.200   1
  -7   4  13 3412.33 1081.75   1
  -7  -4  12-278.497 755.007   1
  -7   4  12 269.517 823.042   1
   7   4 -11 224.022 374.671   1
  -7   4  11 1069.97 845.539   1
  -7  -4  11 905.637 598.393   1
  -7  -4  10 31655.3 2272.79   1
  -7   4  10 38560.6 2781.49   1
   7   4 -10 32871.3 2170.11   1
  -7   4   9 5940.13 1120.79   1
  -7  -4   9 5652.19 918.510   1
   7   4  -9 5952.19 863.172   1
   7   4  -8 43957.3 2224.29   1
  -7  -4   8 37192.0 2206.29   1
  -7   4   8 37011.5 2629.30   1
  -7   4   7 7621.41 1163.81   1
  -7  -4   7 7134.35 860.011   1
  -7   4   7 9352.10 1188.33   2
  -7  -4   6 34210.0 1798.12   1
  -7   4   6 35411.8 2273.03   2
   7   4  -6 34048.4 2390.78   2
  -7   4   6 35033.8 2385.62   1
  -7  -4   5 1823.28 641.803   2
  -7   4   5 2103.39 554.715   2
  -7  -4   5 1878.59 390.537   1
  -7  -4   4 15001.8 1500.42   2
  -7  -4   4 15874.7 971.003   1
  -7   4   4 13716.7 1275.36   2
  -7  -4   3 3751.80 434.676   1
  -7  -4   3 3391.20 737.863   2
  -7   4   3 3316.33 647.504   2
   7   4  -3 4741.05 914.744   2
  -7   4   2 70889.4 3085.06   2
   7   4  -2 76600.8 3686.20   2
  -7  -4   2 72641.4 2441.66   1
  -7  -4   2 71175.8 3565.80   2
  -7  -4   1 1787.99 565.415   2
  -7   4   1 1809.56 534.901   2
   7   4  -1 1805.56 661.183   2
  -7  -4   1 1280.42 304.520   1
   7   4   0 191671. 7017.80   2
   7  -4   0 194734. 6204.35   2
  -7  -4   0 189598. 6955.70   2
  -7  -4   0 204267. 5845.90   1
  -7   4   0 205434. 6230.22   2
   7   4   1 11942.6 1444.94   2
   7  -4   1 10180.1 1008.04   2
  -7  -4  -1 9875.61 918.707   1
  -7   4  -1 10825.7 1018.04   2
   7   4   2 33966.2 2439.48   2
  -7  -4  -2 28295.7 1758.63   1
   7  -4   2 30025.2 1770.65   2
  -7   4  -2 32527.1 1782.48   2
   7   4   3 2013.06 804.773   2
   7  -4   3 2173.12 574.073   2
  -7  -4  -3 1198.54 442.153   1
  -7   4  -3 1772.22 483.676   2
   7  -4   4 13651.4 1192.43   2
  -7  -4  -4 14840.5 1401.60   1
   7   4   4 13726.3 1665.73   2
   7   4   5 810.920 636.839   2
   7  -4   5 672.242 445.524   2
  -7  -4  -5 324.275 358.623   1
   7  -4   6 22398.3 1602.21   2
  -7  -4  -6 19718.4 1876.86   1
   7   4   6 21113.4 2132.10   2
   7   4   7 352.451 738.361   2
   7  -4   7 272.696 347.424   2
   7  -4   8 30372.6 2003.55   2
   7   4   8 25762.4 2456.14   2
   7   4   9 9107.67 1593.58   2
   7   4  10 41343.2 3369.95   2
   7   4  11 14344.6 2085.82   2
  -7  -5  16 28765.9 2913.15   1
  -7   5  16 35806.1 3367.39   1
  -7  -5  15 4235.80 1146.37   1
  -7   5  15 6051.82 1466.27   1
  -7   5  14 54832.8 3949.40   1
  -7  -5  14 55364.6 3704.19   1
  -7   5  13 9517.52 1620.49   1
  -7  -5  13 11922.9 1646.58   1
  -7   5  12 83748.9 4700.47   1
  -7  -5  12 81282.8 4259.45   1
   7   5 -11 9392.31 1188.20   1
  -7  -5  11 9383.49 1292.30   1
  -7   5  11 7699.30 1432.43   1
  -7   5  10 124849. 5606.80   1
  -7  -5  10 120784. 4944.12   1
   7   5 -10 114957. 4606.49   1
  -7  -5   9 5125.74 869.603   1
  -7   5   9 5234.65 1123.24   1
   7   5  -9 4110.17 728.446   1
  -7  -5   8 51361.1 2608.29   1
   7   5  -8 54837.4 2517.93   1
  -7   5   8 57475.2 3347.12   1
   7   5  -7 9498.20 1277.77   2
  -7   5   7 9531.51 1191.17   2
  -7  -5   7 9513.81 954.454   1
  -7   5   7 9712.04 1322.65   1
  -7  -5   6 5768.88 640.891   1
   7   5  -6 5537.15 997.276   2
  -7   5   6 6886.73 981.073   2
  -7   5   6 6837.31 1106.56   1
  -7  -5   5 1722.65 352.951   1
   7   5  -5 1697.67 661.876   2
  -7   5   5 1833.20 534.263   2
  -7   5   5 1680.18 695.361   1
  -7  -5   4 137.667 122.835   1
   7   5  -4 115.546 528.012   2
  -7   5   4 616.095 309.141   2
  -7  -5   3 3534.50 323.649   1
   7   5  -3 3975.77 882.560   2
  -7   5   3 3684.01 640.400   2
  -7   5   2 7620.65 868.199   2
   7   5  -2 5813.43 1064.90   2
  -7  -5   2 7833.94 479.162   1
  -7  -5   2 7808.78 488.538   1
  -7  -5   1 2634.63 347.232   1
  -7   5   1 4585.95 709.085   2
   7   5  -1 5192.76 990.463   2
  -7  -5   0 111493. 3563.50   1
   7   5   0 115276. 4972.15   2
  -7   5   0 117924. 4024.39   2
   7   5   1 16341.2 1738.50   2
  -7   5  -1 17307.6 1203.30   2
  -7  -5  -1 14929.1 1071.02   1
   7   5   2 278244. 9718.30   2
   7  -5   2 308286. 8458.50   2
  -7   5  -2 289232. 8314.50   2
  -7  -5  -2 308867. 8623.91   1
   7  -5   3 22248.6 1425.18   2
  -7   5  -3 23923.6 1432.21   2
  -7  -5  -3 22046.2 1590.47   1
   7   5   3 23839.2 2125.44   2
   7  -5   4 263875. 7562.03   2
  -7  -5  -4 257605. 8175.04   1
   7   5   4 255567. 9127.57   2
   7  -5   5 22188.7 1436.46   2
  -7  -5  -5 22173.0 1823.40   1
   7   5   5 17721.1 1966.27   2
   7  -5   6 110366. 3958.77   2
  -7  -5  -6 110530. 4795.53   1
   7   5   6 106128. 5267.30   2
   7   5   7 7405.99 1388.97   2
   7  -5   7 8023.45 914.720   2
   7   5   8 15731.4 1994.76   2
   7   5   9 797.872 843.216   2
   7   5  10 11087.3 1838.26   2
  -7  -6  16 13500.1 1987.86   1
  -7   6  16 12355.7 2068.55   1
  -7  -6  15 357.013 906.449   1
  -7   6  15 1549.30 909.728   1
  -7  -6  14 9640.59 1526.10   1
  -7   6  14 7088.92 1470.24   1
  -7  -6  13 1625.40 813.747   1
  -7   6  13 946.657 898.868   1
  -7  -6  12 1716.41 743.614   1
  -7   6  12 897.549 746.424   1
   7   6 -11 3222.57 810.889   1
  -7  -6  11 2048.96 722.243   1
  -7   6  11 2820.22 947.443   1
  -7   6  10 22059.9 2235.09   1
  -7  -6  10 18806.7 1691.24   1
   7   6 -10 17828.5 1516.71   1
  -7   6   9 10441.9 1557.27   1
  -7  -6   9 12502.2 1292.30   1
   7   6  -9 14955.9 1274.08   1
  -7  -6   8 36717.7 2083.80   1
   7   6  -8 36507.9 1926.36   1
  -7   6   8 37144.4 2725.86   1
   7   6  -7 19783.6 1898.66   2
  -7  -6   7 20062.2 1328.29   1
  -7   6   7 18584.9 1877.91   1
   7   6  -6 106.166 375.825   2
  -7   6   6 25.4416 285.011   2
  -7  -6   6 416.688 223.603   1
  -7   6   6 50.5440 641.058   1
  -7  -6   5 220.895 126.290   1
   7   6  -5 239.765 413.703   2
  -7   6   5 419.735 360.388   2
   7   6  -4 12537.7 1467.67   2
  -7   6   4 11093.2 1146.25   2
   7   6  -3 520.746 539.271   2
  -7   6   3 939.020 374.540   2
   7   6  -2 15957.6 1679.83   2
  -7   6   2 15371.0 1227.50   2
  -7   6   1 15.2873 255.793   2
   7   6  -1 74.3688 524.910   2
  -7  -6   0 74382.5 2290.19   1
  -7   6   0 76715.8 2920.45   2
   7   6   1 7930.02 1289.99   2
  -7  -6  -1 6848.26 635.075   1
  -7   6  -1 6508.35 718.863   2
   7   6   2 71224.1 3860.64   2
  -7  -6  -2 68217.9 2679.00   1
  -7   6  -2 65299.7 2509.85   2
   7   6   3 11284.9 1595.89   2
  -7  -6  -3 13364.3 1168.46   1
   7   6   4 1426.64 778.093   2
   7  -6   4 895.468 286.069   2
  -7  -6  -4 169.683 417.519   1
   7   6   5 3091.75 983.508   2
   7  -6   5 1509.02 370.293   2
  -7  -6  -5 2835.21 675.062   1
   7  -6   6 26289.5 1433.98   2
  -7  -6  -6 23340.1 1988.26   1
   7   6   6 29509.5 2637.96   2
   7   6   7 2783.32 1031.40   2
   7   6   8 27208.6 2704.59   2
   7   6   9 958.480 825.382   2
   7   6  10 53301.7 4034.44   2
  -7   7  16 24630.4 2898.33   1
  -7  -7  16 26045.8 2689.22   1
  -7  -7  15 2036.88 851.007   1
  -7   7  15 1119.72 976.624   1
  -7   7  14 49518.0 3871.56   1
  -7  -7  14 52783.0 3622.02   1
  -7  -7  13 9974.72 1465.72   1
  -7   7  13 11984.6 1833.53   1
  -7   7  12 83579.2 4869.04   1
  -7  -7  12 88290.7 4401.30   1
  -7   7  11 19076.2 2192.09   1
  -7  -7  11 20915.1 1908.43   1
   7   7 -11 22587.9 1802.92   1
  -7  -7  10 73561.7 3620.95   1
   7   7 -10 78410.6 3444.16   1
  -7   7  10 82765.4 4538.80   1
  -7  -7   9 80001.3 3482.27   1
   7   7  -9 76726.1 3218.57   1
  -7   7   9 71547.3 4189.68   1
  -7  -7   8 27952.7 1718.39   1
   7   7  -8 27620.1 1570.63   1
   7   7  -7 30308.3 2414.82   2
  -7  -7   7 29928.0 1563.33   1
  -7   7   7 31764.2 2531.70   1
   7   7  -6 4083.63 998.506   2
  -7   7   6 4596.78 1002.35   1
   7   7  -5 3962.96 931.042   2
  -7   7   5 3654.51 714.738   2
   7   7  -4 1463.30 701.774   2
  -7   7   4 1577.87 477.542   2
   7   7  -3 39293.9 2735.58   2
  -7   7   3 43158.4 2249.19   2
   7   7  -2 12.8551 485.374   2
  -7   7   2-8.32283 336.253   2
  -7   7   1 92994.5 3364.15   2
   7   7  -1 88682.0 4405.85   2
   7   7   0 17619.4 1859.21   2
  -7   7   0 18524.0 1174.02   2
   7   7   1 20616.4 2049.57   2
  -7   7  -1 22162.2 1213.43   2
  -7  -7  -1 21311.1 956.013   1
   7   7   2 131075. 5779.09   2
  -7  -7  -2 134009. 4109.59   1
  -7   7  -2 127251. 3858.99   2
   7   7   3 6874.69 1336.72   2
  -7  -7  -3 8272.99 888.557   1
  -7  -7  -4 183906. 6086.35   1
   7   7   4 185949. 7495.69   2
  -7  -7  -5 18160.1 1562.90   1
   7   7   5 17194.8 2070.46   2
   7   7   6 77817.2 4561.42   2
   7   7   7 3011.73 1047.75   2
   7   7   8 22696.3 2530.70   2
   7   7   9 2374.92 1183.63   2
   7   7  10 7172.49 1693.97   2
  -7  -8  15 16119.4 2026.12   1
  -7   8  15 10716.7 1902.98   1
  -7  -8  14 1422.91 745.962   1
  -7   8  14-27.3993 699.125   1
  -7  -8  13 3734.46 917.300   1
  -7   8  13 3499.63 1181.40   1
  -7   8  12 192.365 737.406   1
  -7  -8  12 301.478 485.379   1
  -7  -8  11 1705.22 626.694   1
   7   8 -11 1548.19 597.422   1
  -7   8  11 1765.00 857.109   1
   7   8 -10 2297.17 664.262   1
  -7   8  10 2119.93 976.472   1
   7   8  -9 2584.51 568.919   1
  -7   8   9 1921.24 927.345   1
   7   8  -8 92013.0 4640.77   2
   7   8  -8 94867.2 3342.15   1
  -7   8   8 88071.3 4741.94   1
   7   8  -7 1452.86 693.432   2
  -7   8   7 2766.38 992.561   1
   7   8  -6 127300. 5516.84   2
  -7   8   6 116312. 5436.29   1
   7   8  -5 14278.3 1660.69   2
  -7   8   5 13071.3 1300.56   2
   7   8  -4 143555. 5943.84   2
  -7   8   4 138608. 5032.02   2
   7   8  -3 5906.54 1161.58   2
  -7   8   3 5059.09 752.380   2
   7   8  -2 106881. 5036.82   2
  -7   8   2 112995. 3998.86   2
  -7   8   1 2173.81 505.978   2
   7   8  -1 1372.45 765.719   2
   7   8   0 81231.5 4300.41   2
  -7   8   0 82159.3 2852.33   2
   7   8   1 3937.45 1001.67   2
  -7   8  -1 4700.13 471.531   2
   7   8   2 30172.9 2604.10   2
  -7  -8  -2 33608.6 1393.84   1
  -7  -8  -3 66.4614 255.588   1
   7   8   3-133.153 679.634   2
   7   8   4-494.901 782.145   2
   7   8   5-359.510 756.499   2
   7   8   6 21392.6 2372.95   2
   7   8   7 6774.62 1453.77   2
   7   8   8 20691.7 2500.35   2
   7   8   9 17135.9 2431.66   2
  -7   9  15 20019.3 2571.26   1
  -7   9  14 13781.0 2138.60   1
  -7   9  13 41326.8 3526.99   1
  -7   9  12 18264.6 2310.01   1
  -7   9  11 35372.4 3097.90   1
  -7   9  10 1988.05 817.315   1
   7   9  -9 47199.9 2270.44   1
  -7   9   9 42525.6 3295.61   1
  -7   9   8 5596.55 1234.78   1
   7   9  -8 5494.38 1126.26   2
   7   9  -8 8223.74 765.078   1
   7   9  -7 55501.9 3522.10   2
  -7   9   7 62367.7 3838.08   1
   7   9  -6 10827.4 1549.53   2
  -7   9   6 11090.9 1621.40   1
   7   9  -5 21188.3 2109.15   2
   7   9  -4 2874.34 971.275   2
  -7   9   4 1955.98 615.712   2
   7   9  -3 45239.2 3129.55   2
  -7   9   3 47299.1 2380.12   2
   7   9  -2 666.592 765.902   2
  -7   9   2 945.470 394.346   2
  -7   9   1 172468. 5142.94   2
   7   9  -1 157462. 6716.61   2
   7   9   0 14288.4 1806.32   2
  -7   9   0 17525.4 983.007   2
   7   9   1 42120.5 3048.65   2
  -7   9  -1 38262.7 1244.15   2
   7   9   2 38485.9 2993.29   2
   7   9   3 12558.5 1752.36   2
   7   9   4 12465.2 1763.64   2
   7   9   5 12875.7 1847.76   2
   7   9   6 10542.1 1789.94   2
   7   9   7 25154.4 2730.85   2
   7   9   8 8771.30 1734.89   2
   7   9   9 8287.88 1738.93   2
  -7  10  14 2484.30 1099.95   1
  -7  10  13-27.8579 576.509   1
  -7  10  12 1305.66 766.561   1
  -7  10  11 3615.46 1169.27   1
  -7  10  10 21130.2 2371.75   1
  -7  10   9 11286.6 1697.39   1
   7  10  -8 70479.7 4075.68   2
  -7  10   8 72083.1 4366.91   1
   7  10  -7 89722.3 4663.84   2
  -7  10   7 85298.6 4760.32   1
   7  10  -6 75827.8 4210.62   2
  -7  10   6 68369.1 4186.84   1
   7  10  -5 292592. 10139.7   2
   7  10  -4 80771.0 4426.21   2
  -7  10   4 84955.0 3585.38   2
   7  10  -3 218172. 8330.54   2
  -7  10   3 230002. 7029.79   2
   7  10  -2 78823.8 4377.02   2
  -7  10   2 80766.2 3129.75   2
  -7  10   1 43571.3 1895.54   2
   7  10  -1 45251.6 3197.27   2
   7  10   0 27424.4 2526.91   2
  -7  10   0 29870.5 1212.95   2
   7  10   1 1164.97 657.772   2
   7  10   2 1593.96 856.349   2
   7  10   3 669.041 663.956   2
   7  10   4-1155.25 800.327   2
   7  10   5 446.588 839.521   2
   7  10   6 4208.09 1178.98   2
   7  10   7 15482.8 2307.80   2
   7  10   8 3954.23 1323.89   2
  -7  11  13 54157.0 4176.07   1
  -7  11  12 625.813 754.748   1
  -7  11  11 36494.5 3279.41   1
  -7  11  10 2739.17 979.360   1
  -7  11   9 20366.9 2324.54   1
  -7  11   8 9795.94 1670.83   1
   7  11  -8 9800.62 1556.68   2
   7  11  -7 54974.7 3619.15   2
  -7  11   7 55116.2 3802.60   1
   7  11  -6 5378.16 1199.27   2
  -7  11   6 4585.24 1271.02   1
   7  11  -5 8460.22 1513.79   2
   7  11  -4 4618.55 1134.98   2
  -7  11   4 3173.66 719.138   2
   7  11  -3 20692.0 2177.95   2
  -7  11   3 21722.2 1521.64   2
   7  11  -2 632.543 723.379   2
  -7  11   2 2040.01 487.509   2
   7  11  -1 43648.3 3212.35   2
   7  11   0 732.936 721.614   2
   7  11   1 16285.1 2033.49   2
   7  11   2-900.422 739.007   2
   7  11   3 7462.13 1419.52   2
   7  11   4-312.060 693.554   2
   7  11   5 10571.4 1827.90   2
   7  11   6 270.719 962.519   2
   7  11   7 41137.2 3664.65   2
  -7  12  12 5970.13 1453.22   1
  -7  12  11 10291.7 1785.32   1
  -7  12  10 17353.0 2261.51   1
  -7  12   9 44563.1 3583.64   1
  -7  12   8 6952.69 1508.91   1
   7  12  -8 7980.56 1384.48   2
   7  12  -7 97106.2 5140.04   2
  -7  12   7 107721. 5618.97   1
   7  12  -6 1048.46 848.507   2
  -7  12   6 1805.28 865.430   1
   7  12  -5 174348. 7430.30   2
  -7  12   5 189819. 7850.31   1
   7  12  -4 262.316 732.887   2
   7  12  -3 207337. 8214.47   2
   7  12  -2 961.636 718.212   2
   7  12  -1 112601. 5661.10   2
   7  12   0 27315.5 2622.31   2
   7  12   1 7574.27 1405.24   2
   7  12   2 9798.87 1641.56   2
   7  12   3 170.039 623.665   2
   7  12   4 2361.87 947.188   2
   7  12   5 1218.61 751.264   2
   7  12   6-2779.85 1264.65   2
  -7  13  11 21526.2 2615.70   1
  -7  13  10 127.617 529.668   1
  -7  13   9 38742.7 3399.32   1
  -7  13   8 4660.31 1301.52   1
   7  13  -8 4048.70 1054.92   2
   7  13  -7 20223.0 2220.80   2
  -7  13   7 20147.4 2390.33   1
   7  13  -6 3518.23 1040.64   2
  -7  13   6 3990.74 1182.91   1
   7  13  -5 5246.54 1210.26   2
  -7  13   5 4104.01 1092.66   1
   7  13  -4 8472.09 1465.14   2
   7  13  -3 14017.1 1857.64   2
   7  13  -2 44033.2 3376.83   2
   7  13  -1 27916.8 2682.64   2
   7  13   0 23154.9 2530.16   2
   7  13   1 32083.7 2997.22   2
   7  13   2 559.241 678.057   2
   7  13   3 23234.8 2679.97   2
   7  13   4-138.486 745.091   2
   7  13   5 22211.1 2674.38   2
  -7  14  10 5050.00 1346.50   1
  -7  14   9 2828.83 1027.86   1
  -7  14   8 19396.6 2422.63   1
   7  14  -8 17772.9 2127.83   2
   7  14  -7 9185.57 1554.39   2
  -7  14   7 9691.44 1725.72   1
   7  14  -6 21033.4 2308.04   2
  -7  14   6 19437.7 2391.18   1
   7  14  -5 8357.77 1493.75   2
  -7  14   5 5279.48 1345.62   1
   7  14  -4 16331.7 2069.35   2
   7  14  -3 9190.67 1549.91   2
   7  14  -2 53738.3 3858.85   2
   7  14  -1 8935.01 1666.00   2
   7  14   0 52593.9 3906.35   2
   7  14   1 3271.10 1141.94   2
   7  14   2 15826.6 2272.06   2
   7  14   3 3962.53 1308.57   2
   7  14   4 750.022 862.659   2
  -7  15   8 1820.07 979.721   1
   7  15  -8 2683.37 994.638   2
   7  15  -7 8942.03 1664.15   2
  -7  15   7 6687.18 1435.03   1
   7  15  -6 2337.40 801.437   2
  -7  15   6 1413.23 902.252   1
   7  15  -5-1475.42 843.007   2
  -7  15   5-1919.78 975.446   1
   7  15  -4-1127.08 765.142   2
   7  15  -3 9834.74 1680.18   2
   7  15  -2 5371.11 1281.46   2
   7  15  -1 24190.6 2631.47   2
   7  15   0 2486.04 1041.89   2
   7  15   1 44774.7 3769.41   2
   7  15   2 64632.3 4689.84   2
   7  16  -5 5946.69 1334.13   2
  -7  16   5 3797.69 1233.90   1
   7  16  -4 1666.40 774.953   2
  -7  16   4 2129.58 989.432   1
   7  16  -3 2129.49 914.217   2
   7  16  -2 3809.37 1145.03   2
   7  16  -1 6093.27 1439.31   2
  -8   0  17-380.495 794.109   1
  -8   0  16 54432.7 4134.09   1
  -8   0  15 2434.34 1221.37   1
  -8   0  14 12716.1 1889.04   1
  -8   0  13 2511.39 1037.47   1
  -8   0  12 25758.0 2375.22   1
  -8   0  11 1006.64 813.458   1
  -8   0  10 22631.9 2009.72   1
  -8   0   9 1895.05 707.902   1
  -8   0   8 80822.8 3814.38   1
  -8   0   7 1624.44 674.584   1
  -8   0   6 194535. 6579.90   1
  -8   0   5 467.503 546.192   2
  -8   0   5-16.9834 506.790   1
  -8   0   4 337280. 10181.9   2
   8   0  -4 325765. 10150.5   2
  -8   0   4 315093. 9527.07   1
  -8   0   3-220.235 517.783   2
   8   0  -3 325.382 549.086   2
   8   0  -2 172365. 6317.65   2
  -8   0   2 182338. 6380.45   2
  -8   0   1-86.2439 384.585   2
   8   0  -1 99.7079 533.870   2
   8   0   0 16545.5 1551.26   2
  -8   0   0 14625.7 1438.80   2
   8   0   1 478.773 456.601   2
  -8   0  -1 18.2162 321.357   2
   8   0   2 11553.4 1350.33   2
  -8   0  -2 9330.79 1157.53   2
   8   0   3 89.1301 476.910   2
  -8   0  -3-767.605 482.847   1
  -8   0  -3-63.4314 366.307   2
   8   0   4 5678.87 963.632   2
   8   0   5 845.251 518.913   2
   8   0   6 1816.33 656.083   2
   8   0   7 532.757 454.661   2
   8   0   8 57114.2 3539.79   2
   8   0   9-769.616 685.504   2
   8   0  10 120123. 5722.77   2
  -8   1  17 14163.4 2217.88   1
  -8  -1  17 15793.4 2264.72   1
  -8  -1  16 70140.5 4726.97   1
  -8   1  16 74948.9 4901.39   1
  -8   1  15 31144.9 3056.53   1
  -8  -1  15 30122.1 2969.20   1
  -8   1  14 144590. 6816.99   1
  -8  -1  14 154107. 6893.32   1
  -8  -1  13 3983.22 1199.17   1
  -8   1  13 3592.31 1143.20   1
  -8   1  12 131189. 5990.46   1
  -8  -1  12 136118. 5974.23   1
  -8   1  11 14272.7 1731.94   1
  -8  -1  11 12882.1 1610.49   1
  -8   1  10 78786.0 4086.54   1
  -8  -1  10 75359.8 3888.73   1
  -8   1   9 39157.7 2635.13   1
  -8  -1   9 36713.0 2466.57   1
  -8  -1   8 27662.1 1995.27   1
  -8   1   8 24934.7 2023.34   1
  -8  -1   7 16008.0 1505.86   1
  -8   1   7 20059.1 1740.60   1
  -8   1   6 9355.02 1236.54   2
  -8  -1   6 9150.31 1078.51   1
  -8   1   6 8426.00 1129.18   1
  -8   1   5 484.495 589.307   2
   8   1  -5 1643.73 841.115   2
  -8   1   5 1310.62 610.572   1
  -8  -1   5 1558.09 580.290   1
  -8  -1   4 5842.91 1004.16   2
  -8   1   4 4449.07 840.812   2
   8   1  -4 4796.21 991.140   2
  -8  -1   4 5513.76 816.609   1
  -8  -1   3 1611.60 671.987   2
  -8   1   3 990.005 556.232   2
   8   1  -3 1579.52 743.603   2
   8  -1  -3 2125.57 760.217   2
  -8   1   2 47883.7 2692.86   2
   8   1  -2 44232.6 2726.39   2
   8  -1  -2 51473.0 2803.89   2
  -8  -1   2 47039.5 2764.83   2
  -8  -1   1 5089.92 906.113   2
  -8   1   1 5461.58 847.628   2
   8   1  -1 5666.60 1009.02   2
   8  -1  -1 4616.29 857.675   2
   8   1   0 52558.0 2975.38   2
   8  -1   0 53005.4 2863.86   2
  -8  -1   0 47919.6 2835.21   2
  -8   1   0 55234.0 2853.34   2
   8   1   1 8956.78 1192.88   2
   8  -1   1 9172.19 1159.24   2
  -8   1  -1 9898.14 1149.95   2
  -8  -1  -1 8012.66 1105.02   2
   8   1   2 7936.25 1146.75   2
   8  -1   2 6739.50 996.792   2
  -8  -1  -2 8694.92 1139.89   2
  -8   1  -2 6566.07 964.569   2
  -8  -1  -2 6700.49 992.589   1
   8   1   3 1640.15 611.807   2
   8  -1   3 1735.34 594.845   2
  -8   1  -3 1878.24 566.667   2
  -8  -1  -3 2218.77 661.090   1
   8   1   4 4177.12 964.662   2
   8  -1   4 5524.91 935.305   2
  -8   1  -4 5598.30 930.982   2
   8   1   5 2329.27 778.652   2
   8  -1   5 3603.65 831.417   2
   8   1   6 18740.9 1885.39   2
   8  -1   6 17791.8 1784.82   2
   8   1   7 2578.08 838.573   2
   8  -1   7 2151.61 736.664   2
   8  -1   8 24358.3 2179.76   2
   8   1   8 23698.3 2275.77   2
   8   1   9 2168.21 907.512   2
   8  -1   9 2759.26 892.056   2
   8   1  10 975.063 736.804   2
   8  -1  10 1460.76 727.684   2
  -8  -2  17 229.317 696.021   1
  -8   2  17 1229.15 1098.47   1
  -8  -2  16 45305.1 3717.40   1
  -8   2  16 52107.7 4044.64   1
  -8   2  15-674.869 720.812   1
  -8  -2  15-2096.40 1067.86   1
  -8   2  14 10260.8 1766.05   1
  -8  -2  14 9767.38 1643.32   1
  -8  -2  13 1404.68 871.872   1
  -8   2  13 1486.85 881.513   1
  -8  -2  12 10648.6 1563.81   1
  -8   2  12 10864.0 1617.93   1
  -8  -2  11 3285.94 910.661   1
  -8   2  11 1837.82 797.278   1
  -8   2  10 47728.0 3111.52   1
  -8  -2  10 46896.7 2894.08   1
  -8   2   9 712.286 763.930   1
  -8  -2   9 617.079 539.052   1
  -8  -2   8 63683.9 3130.47   1
  -8   2   8 59747.8 3337.36   1
  -8  -2   7 53415.2 2729.21   1
  -8   2   7 60441.9 3231.26   1
  -8   2   6 152078. 5786.17   2
  -8   2   6 141548. 5587.15   1
  -8  -2   6 153377. 5216.63   1
  -8   2   5 105543. 4408.13   2
   8   2  -5 99680.9 4529.58   2
  -8   2   5 94927.7 4232.75   1
  -8  -2   5 101009. 3799.07   1
  -8   2   4 164133. 5973.34   2
   8   2  -4 160935. 6199.22   2
  -8  -2   4 167363. 5357.75   1
  -8  -2   3 105457. 4655.92   2
  -8   2   3 113522. 4530.85   2
   8   2  -3 111747. 4785.37   2
  -8   2   2 40909.7 2397.40   2
   8   2  -2 45203.2 2753.63   2
   8  -2  -2 36928.2 2360.39   2
  -8  -2   2 40596.1 2586.57   2
   8   2  -1 83975.3 4065.19   2
   8  -2  -1 85670.0 3833.23   2
  -8  -2   1 97692.1 4253.33   2
  -8   2   1 87087.2 3775.04   2
  -8   2   0 1264.11 547.540   2
   8   2   0 832.043 602.285   2
   8  -2   0 1361.89 566.440   2
   8   2   1 73093.9 3749.71   2
   8  -2   1 77000.4 3483.57   2
  -8   2  -1 69586.4 3320.80   2
  -8  -2  -1 80773.7 3410.22   1
   8   2   2 173.018 445.181   2
   8  -2   2-37.4931 475.056   2
  -8   2  -2 114.336 370.156   2
  -8  -2  -2 315.342 354.545   1
   8   2   3 5448.19 1021.54   2
  -8  -2  -3 3802.87 801.883   1
   8  -2   3 6503.74 970.543   2
  -8   2  -3 4379.46 789.208   2
   8   2   4 2224.60 787.797   2
   8  -2   4 2396.55 668.097   2
  -8  -2  -4 1771.26 600.636   1
   8   2   5 20278.6 1993.40   2
   8  -2   5 17867.6 1660.91   2
   8   2   6 899.210 753.924   2
   8  -2   6 606.516 469.846   2
   8  -2   7 43562.9 2761.56   2
   8   2   7 43385.0 3123.36   2
   8  -2   8 19024.1 1848.58   2
   8   2   8 18142.4 2082.50   2
   8  -2   9 21928.1 2005.10   2
   8   2   9 22417.5 2359.66   2
   8   2  10 36780.8 3075.71   2
  -8   3  16 316.726 630.548   1
  -8  -3  16 277.252 711.699   1
  -8  -3  15 20410.8 2370.61   1
  -8   3  15 24260.3 2684.54   1
  -8   3  14 17750.6 2220.14   1
  -8  -3  14 16707.3 2045.33   1
  -8  -3  13 8179.12 1385.23   1
  -8   3  13 8267.99 1513.14   1
  -8   3  12 75633.6 4369.51   1
  -8  -3  12 75297.1 4116.01   1
  -8   3  11 38356.6 2956.11   1
   8   3 -11 41728.4 2619.63   1
  -8  -3  11 44238.3 2886.16   1
  -8   3  10 16555.8 1835.51   1
  -8  -3  10 14677.0 1579.03   1
  -8  -3   9 36475.5 2354.04   1
  -8   3   9 31890.7 2491.13   1
  -8   3   8 413.510 568.819   1
  -8  -3   8 549.093 453.160   1
  -8   3   7 478.741 630.676   1
  -8  -3   7 961.290 411.882   1
  -8  -3   6 4417.35 728.975   1
  -8   3   6 5307.34 952.514   2
   8   3  -6 3912.01 964.526   2
  -8   3   6 6429.82 1118.16   1
  -8  -3   5 495.899 372.392   1
  -8   3   5 1532.14 563.655   2
   8   3  -5 277.294 591.073   2
  -8   3   5 304.562 591.487   1
  -8  -3   4 1280.80 397.629   1
  -8   3   4 1175.48 550.122   2
   8   3  -4 346.596 614.024   2
  -8   3   3 8925.09 1112.24   2
   8   3  -3 8854.27 1266.98   2
  -8  -3   3 7978.74 806.178   1
  -8   3   2 69869.3 3229.65   2
   8   3  -2 66106.6 3556.16   2
  -8   3   1 2801.02 652.896   2
   8   3  -1 2272.85 741.304   2
   8  -3  -1 3189.85 707.998   2
   8   3   0 169802. 6607.68   2
   8  -3   0 191539. 6226.45   2
  -8  -3   0 179237. 5727.77   1
  -8   3   0 169832. 5954.90   2
   8   3   1 27676.1 2237.16   2
  -8  -3  -1 26064.6 1747.32   1
   8  -3   1 31098.6 2014.03   2
  -8   3  -1 32260.6 1970.46   2
   8   3   2 139001. 5723.51   2
   8  -3   2 140324. 5086.02   2
  -8  -3  -2 136737. 5022.11   1
  -8   3  -2 130518. 4877.15   2
   8   3   3 95110.2 4636.10   2
   8  -3   3 98132.2 4056.62   2
  -8  -3  -3 94548.3 4125.47   1
  -8   3  -3 101238. 4012.20   2
   8   3   4 24038.5 2205.80   2
   8  -3   4 26102.6 1862.08   2
  -8  -3  -4 27622.4 2068.88   1
   8   3   5 24026.5 2235.29   2
   8  -3   5 21286.6 1717.16   2
   8  -3   6 67311.8 3312.11   2
   8   3   6 57676.2 3702.68   2
   8   3   7 615.081 686.617   2
   8  -3   7 219.334 458.496   2
   8  -3   8 44301.4 2736.52   2
   8   3   8 42993.1 3281.69   2
   8   3   9 567.498 744.421   2
  -8   4  16 11222.8 1926.71   1
  -8  -4  16 11976.3 1879.89   1
  -8  -4  15 19.0091 616.967   1
  -8   4  15 208.302 766.351   1
  -8  -4  14-662.126 719.055   1
  -8   4  14 83.9338 790.489   1
  -8  -4  13 888.922 604.382   1
  -8   4  13 1048.99 665.837   1
  -8   4  12 3548.07 985.159   1
  -8  -4  12 3252.97 923.957   1
  -8   4  11-207.660 691.207   1
  -8  -4  11 1015.73 599.201   1
   8   4 -11 448.002 383.804   1
  -8   4  10 28216.4 2451.74   1
   8   4 -10 22565.6 1761.70   1
  -8  -4  10 23166.2 1962.57   1
  -8   4   9 5150.56 1112.30   1
  -8  -4   9 6197.37 952.501   1
  -8  -4   8 21009.8 1576.87   1
  -8   4   8 16528.3 1797.76   1
  -8  -4   7 70075.8 3055.74   1
  -8   4   7 72782.8 3800.45   1
  -8   4   6 1248.67 507.443   2
   8   4  -6 1386.68 736.470   2
  -8  -4   6 797.068 369.908   1
  -8   4   6 523.263 527.914   1
  -8  -4   5 116785. 3896.91   1
  -8   4   5 118800. 4745.82   2
   8   4  -5 109840. 5041.02   2
  -8  -4   4 1593.43 341.278   1
  -8   4   4 1427.33 480.450   2
   8   4  -4 1534.09 641.890   2
  -8   4   3 22679.1 1706.19   2
   8   4  -3 20422.3 1936.57   2
  -8  -4   3 22372.6 1231.02   1
  -8   4   2 218.996 383.891   2
   8   4  -2 326.642 508.135   2
   8   4  -1 63304.1 3533.25   2
  -8  -4   1 58627.8 2418.62   1
  -8   4   1 65578.9 2967.23   2
  -8   4   0 3383.83 700.455   2
   8   4   0 3276.12 944.195   2
  -8  -4   0 3508.28 586.618   1
   8  -4   0 2237.89 629.563   2
   8   4   1 75668.9 3998.08   2
   8  -4   1 77031.6 3353.84   2
  -8  -4  -1 76267.1 3164.90   1
  -8   4  -1 80596.4 3326.77   2
  -8  -4  -2 540.943 473.369   1
   8   4   2 1193.57 797.636   2
   8  -4   2 990.508 540.383   2
  -8   4  -2 792.624 472.772   2
   8   4   3 2341.62 970.047   2
   8  -4   3 920.555 544.436   2
  -8   4  -3 822.343 414.727   2
   8   4   4 2177.78 834.285   2
   8  -4   4 1598.82 621.337   2
  -8  -4  -4 1435.81 525.345   1
   8   4   5 43473.1 3166.94   2
   8  -4   5 48169.3 2547.22   2
  -8  -4  -5 43863.3 2797.83   1
   8   4   6 24.8225 832.409   2
   8  -4   6-379.055 394.895   2
   8  -4   7 64964.4 3188.66   2
   8   4   7 65414.0 4121.27   2
   8   4   8 436.326 891.108   2
   8   4   9 17014.7 2170.19   2
  -8   5  16 370.991 779.397   1
  -8  -5  16-1326.78 886.037   1
  -8  -5  15 307.721 697.494   1
  -8   5  15-786.149 747.493   1
  -8   5  14-892.988 762.054   1
  -8  -5  14-936.167 736.230   1
  -8  -5  13 14313.8 1738.58   1
  -8   5  13 12628.9 1927.60   1
  -8  -5  12 533.944 630.307   1
  -8   5  12 566.957 596.460   1
  -8   5  11 71964.1 4239.24   1
  -8  -5  11 64411.7 3527.78   1
   8   5 -11 65744.2 3307.70   1
   8   5 -10 634.510 434.004   1
  -8  -5  10-42.6430 549.518   1
  -8  -5   9 82547.2 3688.23   1
  -8   5   9 83086.2 4414.66   1
  -8   5   8 13567.1 1684.66   1
  -8  -5   8 12613.4 1211.70   1
   8   5  -7 14321.2 1661.43   2
  -8   5   7 17839.6 1875.76   1
  -8  -5   7 14911.4 1199.11   1
  -8   5   6 16032.9 1572.74   2
   8   5  -6 18193.5 1872.20   2
  -8  -5   6 18318.4 1198.41   1
  -8   5   6 18765.3 1863.66   1
  -8  -5   5 4853.81 553.145   1
  -8   5   5 5274.59 870.433   2
   8   5  -5 4398.59 969.275   2
  -8   5   4 1327.33 475.559   2
   8   5  -4 278.355 635.799   2
  -8  -5   4 1094.75 261.194   1
  -8  -5   3 2463.20 329.414   1
  -8   5   3 2035.86 563.627   2
   8   5  -3 1288.81 697.929   2
  -8  -5   2 17836.7 933.366   1
  -8   5   2 16577.7 1400.84   2
   8   5  -2 16448.8 1751.25   2
  -8  -5   2 16353.3 881.230   1
  -8   5   1 65517.4 2987.95   2
   8   5  -1 68657.7 3763.43   2
  -8  -5   1 69710.3 2431.32   1
  -8  -5   0 40911.5 1858.42   1
   8   5   0 41178.6 2890.29   2
  -8   5   0 44070.7 2250.09   2
   8   5   1 286644. 9756.82   2
  -8   5  -1 276743. 8301.93   2
  -8  -5  -1 291048. 8159.60   1
   8   5   2 25856.3 2353.19   2
   8  -5   2 25890.2 1686.63   2
  -8   5  -2 24955.1 1605.72   2
  -8  -5  -2 26794.7 1708.92   1
   8   5   3 331960. 11273.6   2
  -8   5  -3 305420. 9491.14   2
  -8  -5  -3 339406. 10038.1   1
   8   5   4 13289.4 1794.25   2
   8  -5   4 12149.0 1147.60   2
  -8  -5  -4 12656.1 1320.46   1
   8  -5   5 169991. 5662.66   2
   8   5   5 173765. 7239.21   2
   8   5   6 15666.0 2007.98   2
   8  -5   6 20663.8 1520.12   2
   8   5   7 49968.1 3630.98   2
   8   5   8 3889.38 1138.83   2
   8   5   9 5179.69 1296.98   2
  -8  -6  16 743.645 660.258   1
  -8   6  16-694.710 1087.62   1
  -8  -6  15 783.870 656.678   1
  -8   6  15 73.0202 717.753   1
  -8  -6  14-372.113 658.604   1
  -8   6  14 132.223 798.366   1
  -8  -6  13-53.5480 590.965   1
  -8   6  13-3244.19 1157.22   1
  -8  -6  12 3893.79 1010.61   1
  -8   6  12 1369.21 819.056   1
  -8   6  11-329.324 755.474   1
  -8  -6  11-268.772 436.516   1
   8   6 -11 625.430 408.922   1
  -8   6  10 2537.36 1047.02   1
  -8  -6  10 3114.21 767.009   1
   8   6 -10 4039.49 763.855   1
  -8  -6   9 28308.9 1897.53   1
  -8   6   9 24026.0 2314.12   1
  -8  -6   8 19252.8 1437.61   1
  -8   6   8 21767.9 2150.66   1
  -8  -6   7 75415.1 2901.74   1
   8   6  -7 68176.5 3926.48   2
  -8   6   7 76163.1 4129.29   1
  -8  -6   6 1116.87 273.120   1
  -8   6   6 793.412 552.475   2
   8   6  -6 806.424 597.381   2
  -8   6   6 165.104 618.650   1
  -8   6   5 38532.0 2369.53   2
   8   6  -5 36696.1 2714.49   2
  -8  -6   5 33675.4 1329.01   1
  -8   6   4 629.897 397.766   2
   8   6  -4 2040.02 811.987   2
  -8   6   3 34568.9 2096.83   2
   8   6  -3 33739.6 2593.91   2
  -8   6   2 15676.2 1339.56   2
   8   6  -2 16087.1 1791.67   2
  -8   6   1 72267.2 3072.29   2
   8   6  -1 74087.9 4026.66   2
  -8   6   0 2851.26 625.194   2
   8   6   0 3431.56 1055.60   2
  -8  -6   0 2971.78 398.597   1
   8   6   1 41597.2 3012.53   2
  -8  -6  -1 43590.8 1936.35   1
  -8   6  -1 46667.8 2186.67   2
   8   6   2 11234.1 1622.59   2
  -8  -6  -2 10646.2 991.269   1
  -8   6  -2 10369.0 957.999   2
   8   6   3 2166.89 989.463   2
  -8  -6  -3 1827.29 544.280   1
   8   6   4 526.709 767.083   2
   8  -6   4 1043.06 436.860   2
   8   6   5 26904.4 2603.53   2
   8   6   6 1231.01 863.266   2
   8   6   7 27183.4 2725.24   2
   8   6   8 1352.76 822.590   2
   8   6   9 15196.4 2191.65   2
  -8  -7  15 14756.7 1964.32   1
  -8   7  15 11573.8 1905.98   1
  -8  -7  14 5141.28 1184.26   1
  -8   7  14 1521.89 925.206   1
  -8   7  13 10108.3 1784.61   1
  -8  -7  13 12093.4 1621.52   1
  -8   7  12 1972.21 805.018   1
  -8  -7  12 3206.93 879.564   1
  -8   7  11 35786.7 3047.57   1
  -8  -7  11 32566.9 2344.20   1
  -8  -7  10 10397.0 1209.21   1
  -8   7  10 8481.34 1516.43   1
   8   7 -10 9707.56 1049.04   1
  -8  -7   9 53134.9 2690.52   1
  -8   7   9 54360.8 3624.04   1
  -8   7   8 2479.66 1003.97   1
   8   7  -8 914.121 698.523   2
  -8  -7   8 2411.47 515.516   1
  -8  -7   7 34643.0 1605.27   1
   8   7  -7 30620.0 2586.82   2
  -8   7   7 34489.7 2764.39   1
   8   7  -6-452.385 686.484   2
  -8   7   6-487.531 343.038   2
  -8   7   6 658.253 715.269   1
   8   7  -5 1932.54 808.466   2
  -8   7   5 3123.28 741.438   2
   8   7  -4 1991.27 837.650   2
  -8   7   4 257.188 353.749   2
  -8   7   3 4802.45 759.750   2
   8   7  -3 3871.87 1065.54   2
  -8   7   2 73852.4 3147.66   2
   8   7  -2 70305.8 3997.77   2
  -8   7   1 57646.7 2570.05   2
   8   7  -1 50187.3 3359.47   2
   8   7   0 47712.7 3276.80   2
  -8   7   0 54686.4 2388.15   2
  -8  -7  -1 158874. 4489.20   1
   8   7   1 155775. 6675.77   2
  -8   7  -1 162914. 4984.67   2
   8   7   2 16595.0 2021.46   2
  -8  -7  -2 18735.1 1159.24   1
  -8   7  -2 15498.7 1057.01   2
   8   7   3 161102. 6967.83   2
   8   7   4 10175.0 1691.15   2
   8   7   5 95569.0 5233.13   2
   8   7   6 30778.1 2914.84   2
   8   7   7 22472.3 2548.36   2
   8   7   8 38028.1 3388.53   2
  -8   8  15 759.595 831.645   1
  -8  -8  15 172.147 651.844   1
  -8  -8  14 6538.76 1229.57   1
  -8   8  14 4823.78 1345.63   1
  -8  -8  13-285.102 528.986   1
  -8   8  13 1227.76 1005.80   1
  -8  -8  12 7188.57 1125.98   1
  -8   8  12 6215.82 1337.77   1
  -8  -8  11 796.338 512.192   1
  -8   8  11 871.479 892.661   1
  -8  -8  10 16008.4 1471.84   1
  -8   8  10 17539.9 2119.08   1
  -8   8   9 24942.7 2512.53   1
  -8   8   8 4441.44 1147.40   1
   8   8  -8 2785.87 975.231   2
   8   8  -7 110103. 5333.87   2
  -8   8   7 114764. 5528.30   1
   8   8  -6 23196.1 2248.90   2
  -8   8   6 20542.9 1779.46   2
  -8   8   6 21448.3 2212.44   1
   8   8  -5 77708.0 4266.17   2
  -8   8   5 75952.5 3584.39   2
   8   8  -4 33767.1 2694.24   2
  -8   8   4 31208.2 2034.72   2
  -8   8   3 89116.9 3657.34   2
   8   8  -3 83257.8 4511.61   2
  -8   8   2 12766.6 1147.59   2
   8   8  -2 12343.8 1664.74   2
  -8   8   1 47665.7 2213.20   2
   8   8  -1 40872.2 3074.42   2
   8   8   0 7624.16 1418.30   2
  -8   8   0 8279.43 812.821   2
   8   8   1 36595.8 2931.62   2
  -8   8  -1 36645.8 1641.17   2
   8   8   2 23036.3 2368.58   2
   8   8   3 1528.71 852.048   2
   8   8   4 359.656 647.524   2
   8   8   5 21306.3 2385.18   2
   8   8   6 16234.9 2120.59   2
   8   8   7 45649.7 3736.34   2
   8   8   8-1405.52 854.254   2
  -8   9  14 59189.9 4471.48   1
  -8   9  13 54993.0 4190.94   1
  -8   9  12 43627.5 3634.60   1
  -8   9  11 63793.9 4361.01   1
  -8   9  10 25097.2 2584.28   1
  -8   9   9 11163.0 1789.79   1
   8   9  -8 3921.64 1084.57   2
  -8   9   8 3412.72 1075.58   1
   8   9  -7 18778.7 2147.82   2
  -8   9   7 22868.7 2371.67   1
   8   9  -6 1888.49 829.538   2
  -8   9   6 2505.03 713.126   2
  -8   9   6 1822.08 837.636   1
   8   9  -5 631.698 733.366   2
  -8   9   5-739.964 501.300   2
   8   9  -4 818.432 696.307   2
  -8   9   4 776.850 482.183   2
   8   9  -3 3026.96 1008.51   2
  -8   9   3 2699.97 659.944   2
  -8   9   2 49346.2 2362.92   2
   8   9  -2 43415.1 3205.92   2
  -8   9   1 424.716 325.125   2
   8   9  -1-8.19470 579.759   2
   8   9   0 50047.8 3498.40   2
   8   9   1 6185.26 1341.96   2
   8   9   2 10609.3 1712.15   2
   8   9   3 3789.38 1067.15   2
   8   9   4 13195.1 1929.80   2
   8   9   5 783.555 673.315   2
   8   9   6 35841.9 3274.10   2
   8   9   7-1934.06 998.437   2
  -8  10  13 931.482 1135.78   1
  -8  10  12 6950.15 1655.41   1
  -8  10  11 1113.91 988.047   1
  -8  10  10 31819.0 3036.10   1
  -8  10   9 16363.8 2143.57   1
   8  10  -8 47870.3 3410.06   2
  -8  10   8 43934.8 3449.89   1
   8  10  -7 39881.8 3104.23   2
  -8  10   7 40784.9 3236.88   1
   8  10  -6 66707.9 4131.03   2
  -8  10   6 74603.2 4436.56   1
   8  10  -5 39089.8 3048.35   2
  -8  10   5 41028.0 2489.51   2
   8  10  -4 99011.7 5186.24   2
  -8  10   4 103269. 4165.14   2
   8  10  -3 36024.5 2904.70   2
  -8  10   3 34142.9 2028.36   2
   8  10  -2 33185.6 2836.32   2
   8  10  -1 23188.3 2339.76   2
   8  10   0 2572.50 952.392   2
   8  10   1 19778.8 2254.30   2
   8  10   2 414.360 713.583   2
   8  10   3-960.550 664.614   2
   8  10   4 470.482 702.448   2
   8  10   5 5437.79 1494.35   2
   8  10   6-998.937 813.182   2
  -8  11  13 12329.4 2088.12   1
  -8  11  12 107011. 6164.67   1
  -8  11  11 2588.64 1133.65   1
  -8  11  10 38184.4 3361.72   1
  -8  11   9-1931.10 998.951   1
   8  11  -8 7287.96 1399.35   2
  -8  11   8 10136.1 1662.64   1
   8  11  -7 1055.30 931.257   2
  -8  11   7 2603.21 1157.40   1
   8  11  -6 4817.57 1170.68   2
  -8  11   6 5355.68 1374.51   1
   8  11  -5 1133.86 773.322   2
   8  11  -4 6336.49 1361.44   2
   8  11  -3 8163.88 1459.32   2
   8  11  -2 21055.4 2294.71   2
   8  11  -1 5235.60 1315.07   2
   8  11   0 14745.1 1915.60   2
   8  11   1 1251.90 758.967   2
   8  11   2-237.329 628.223   2
   8  11   3 163.420 821.948   2
   8  11   4-298.856 735.235   2
   8  11   5-1481.61 901.524   2
   8  11   6 2167.81 1039.34   2
  -8  12  12 42.7002 616.723   1
  -8  12  11 1384.03 877.847   1
  -8  12  10 19534.7 2450.35   1
  -8  12   9-1047.27 775.091   1
   8  12  -9 1828.75 847.548   2
   8  12  -8 48867.4 3621.88   2
  -8  12   8 54542.9 4005.13   1
   8  12  -7 927.223 737.612   2
  -8  12   7-115.971 855.532   1
   8  12  -6 80390.1 4745.93   2
  -8  12   6 87396.8 5097.67   1
   8  12  -5 1299.87 787.918   2
   8  12  -4 123852. 6101.51   2
   8  12  -3 1917.65 895.232   2
   8  12  -2 101514. 5446.59   2
   8  12  -1 19177.8 2273.75   2
   8  12   0 48732.2 3710.92   2
   8  12   1 28330.4 2853.45   2
   8  12   2 3810.64 1149.48   2
   8  12   3 22.3521 479.384   2
   8  12   4-1437.04 880.656   2
   8  12   5 4612.87 1324.91   2
  -8  13  10 13988.1 2133.07   1
  -8  13   9 4933.57 1358.70   1
   8  13  -9 2750.62 1078.13   2
  -8  13   8 10059.0 1892.94   1
   8  13  -8 7073.04 1403.68   2
   8  13  -7 2429.07 1019.60   2
  -8  13   7 2471.66 1142.04   1
   8  13  -6 3566.24 1116.58   2
  -8  13   6 4491.52 1250.25   1
   8  13  -5 975.751 860.656   2
  -8  13   5 51.3330 618.599   1
   8  13  -4 382.564 544.263   2
   8  13  -3 9407.70 1656.81   2
   8  13  -2 18094.1 2254.56   2
   8  13  -1 12231.3 1894.19   2
   8  13   0 24128.6 2624.21   2
   8  13   1 653.746 697.737   2
   8  13   2 25717.4 2858.81   2
   8  13   3 1268.05 735.674   2
  -8  14   9 2613.55 1015.53   1
   8  14  -9 3198.09 994.445   2
  -8  14   8 8328.00 1753.48   1
   8  14  -8 10178.3 1746.70   2
   8  14  -7 19057.5 2315.03   2
  -8  14   7 22351.1 2664.93   1
   8  14  -6 28574.0 2806.87   2
  -8  14   6 33725.4 3225.99   1
   8  14  -5 23702.9 2544.38   2
  -8  14   5 26452.0 2844.57   1
   8  14  -4 25106.3 2669.61   2
   8  14  -3 19696.3 2403.92   2
   8  14  -2 11189.6 1825.22   2
   8  14  -1 50928.0 3939.30   2
   8  14   0-1152.55 760.025   2
   8  14   1 40419.9 3615.09   2
   8  14   2 1424.74 1022.60   2
   8  15  -6 1023.88 773.416   2
  -8  15   6-489.810 619.774   1
   8  15  -5 2697.19 936.398   2
  -8  15   5 338.782 685.909   1
   8  15  -4 1633.56 921.176   2
   8  15  -3-1120.25 745.895   2
   8  15  -2 16515.9 2252.54   2
   8  15  -1 2744.59 1119.68   2
  -9   0  16 1194.84 978.563   1
  -9   0  15 49011.5 3783.21   1
  -9   0  14 2089.39 1027.24   1
  -9   0  13 3815.19 1206.62   1
  -9   0  12 2013.34 1004.76   1
  -9   0  11 71837.9 4009.48   1
  -9   0  10 609.677 548.121   1
  -9   0   9 21392.3 1915.83   1
  -9   0   8 175.569 482.671   1
  -9   0   7 11737.8 1346.28   1
  -9   0   6 81.9862 489.113   1
  -9   0   5 22611.3 1757.91   1
   9   0  -4-42.7539 631.029   2
   9   0  -3 163456. 6275.17   2
   9   0  -2-137.300 471.792   2
   9   0  -1 68413.3 3591.56   2
   9   0   0 924.066 575.416   2
   9   0   1 2150.55 795.316   2
   9   0   2 3.07114 467.997   2
   9   0   3 6945.08 1137.55   2
   9   0   4-378.771 495.418   2
   9   0   5 16709.1 1809.94   2
   9   0   6 155.715 584.080   2
   9   0   7 58615.9 3631.82   2
   9   0   8 338.998 687.066   2
  -9   1  16 13164.8 2114.65   1
  -9  -1  16 14548.9 2172.99   1
  -9   1  15 167629. 7651.81   1
  -9  -1  15 163752. 7469.08   1
  -9   1  14 33673.4 3049.18   1
  -9  -1  14 38879.9 3173.03   1
  -9   1  13 201013. 8049.91   1
  -9  -1  13 187344. 7771.37   1
  -9   1  12 26764.4 2491.32   1
  -9  -1  12 30140.1 2537.05   1
  -9   1  11 115525. 5375.70   1
  -9  -1  11 106625. 5031.13   1
  -9   1  10 38636.8 2772.74   1
  -9  -1  10 37098.1 2655.16   1
  -9   1   9 3267.14 869.021   1
  -9  -1   9 3018.24 806.507   1
  -9   1   8 7107.35 1135.19   1
  -9  -1   8 6181.69 999.225   1
  -9   1   7-76.2720 528.286   1
  -9  -1   7 270.437 369.380   1
  -9  -1   6 198.057 411.909   1
  -9   1   6-527.148 460.662   1
   9   1  -5-112.913 675.704   2
  -9   1   5 936.303 558.705   1
  -9  -1   5 516.010 440.788   1
   9   1  -4 4602.57 1004.33   2
  -9  -1   4 5500.43 886.343   1
   9   1  -3 8216.31 1257.25   2
   9  -1  -3 8818.39 1207.15   2
  -9   1   2 5037.37 946.165   2
   9   1  -2 3876.73 932.567   2
   9  -1  -2 5518.41 985.253   2
   9   1  -1 36561.3 2578.01   2
   9  -1  -1 37617.0 2532.67   2
  -9   1   1 38844.1 2503.37   2
   9   1   0 6913.05 1135.48   2
   9  -1   0 5864.19 1039.85   2
  -9   1   0 4855.61 896.533   2
   9   1   1 80006.3 4012.79   2
   9  -1   1 73591.5 3743.15   2
  -9   1  -1 76096.2 3701.03   2
   9   1   2 823.332 579.017   2
   9  -1   2 264.037 488.756   2
  -9  -1  -2-102.483 304.047   1
  -9   1  -2 393.614 390.151   2
   9   1   3 10353.6 1403.68   2
   9  -1   3 9082.05 1261.30   2
   9   1   4 479.491 533.524   2
   9  -1   4 1515.83 608.307   2
   9   1   5 5457.41 1114.59   2
   9  -1   5 3706.31 933.951   2
   9   1   6 2889.68 939.474   2
   9  -1   6 3706.74 916.305   2
   9   1   7 34099.0 2799.28   2
   9  -1   7 37711.5 2753.39   2
   9   1   8 3363.64 1045.37   2
   9  -1   8 3292.40 912.989   2
  -9   2  16-79.1562 803.197   1
  -9  -2  16 1412.38 943.990   1
  -9   2  15 7428.84 1653.33   1
  -9  -2  15 8383.01 1592.47   1
  -9  -2  14 12372.6 1856.65   1
  -9   2  14 11436.7 1939.04   1
  -9  -2  13 9535.57 1558.42   1
  -9   2  13 8164.17 1563.58   1
  -9  -2  12 5435.15 1154.34   1
  -9   2  12 5222.45 1346.38   1
  -9   2  11 47584.1 3294.14   1
  -9  -2  11 42903.0 2896.50   1
  -9   2  10 13623.0 1675.30   1
  -9  -2  10 13370.9 1518.63   1
  -9  -2   9 32077.9 2260.58   1
  -9   2   9 28623.8 2392.16   1
  -9   2   8 175.126 572.988   1
  -9  -2   8 618.928 455.787   1
  -9  -2   7 18536.2 1546.59   1
  -9   2   7 17496.8 1728.25   1
  -9   2   6 23346.0 1991.04   1
  -9  -2   6 23121.1 1689.81   1
   9   2  -5 48309.9 3072.96   2
  -9   2   5 48137.0 2870.05   1
  -9  -2   5 46542.8 2444.70   1
   9   2  -4 39551.2 2747.85   2
  -9  -2   4 38910.6 2166.85   1
  -9   2   3 105343. 4475.10   2
   9   2  -3 93495.4 4589.19   2
   9   2  -2 40607.0 2792.75   2
   9  -2  -2 44659.6 2679.73   2
  -9   2   2 38548.5 2497.85   2
   9   2  -1 24957.6 2156.22   2
   9  -2  -1 26998.1 2052.50   2
  -9   2   1 27296.6 2002.64   2
   9   2   0 5118.16 1018.34   2
   9  -2   0 4341.53 854.978   2
  -9   2   0 4327.99 847.312   2
   9   2   1 130.075 581.264   2
   9  -2   1 695.722 540.449   2
  -9  -2  -1-14.4756 346.305   1
  -9   2  -1-596.380 458.102   2
   9   2   2 5678.20 1161.12   2
   9  -2   2 6761.24 1054.61   2
  -9  -2  -2 5448.71 946.231   1
  -9   2  -2 5452.49 918.702   2
  -9  -2  -3 439.539 393.565   1
   9   2   3 207.381 551.850   2
   9  -2   3 284.964 442.897   2
  -9   2  -3 414.993 430.177   2
   9   2   4 9496.55 1455.25   2
   9  -2   4 9670.43 1247.87   2
   9   2   5-789.932 673.514   2
   9  -2   5 867.448 600.098   2
   9   2   6 58433.6 3756.36   2
   9  -2   6 57289.6 3319.67   2
   9   2   7 8317.92 1544.27   2
   9  -2   7 8206.71 1277.37   2
   9   2   8 35302.3 2975.82   2
  -9  -3  16 38345.6 3356.44   1
  -9   3  16 37498.8 3466.84   1
  -9  -3  15 699.654 807.067   1
  -9   3  15 133.534 872.818   1
  -9  -3  14 20711.0 2234.04   1
  -9   3  14 21265.5 2417.02   1
  -9  -3  13 6685.41 1242.38   1
  -9   3  13 6506.37 1412.36   1
  -9   3  12 29664.5 2776.00   1
  -9  -3  12 37352.2 2794.08   1
  -9   3  11 16806.1 1975.82   1
  -9  -3  11 18860.4 1869.53   1
  -9   3  10 76450.5 4285.89   1
  -9  -3  10 76535.3 3831.06   1
  -9   3   9 1117.19 756.471   1
  -9  -3   9 2071.58 682.578   1
  -9  -3   8 45757.3 2579.78   1
  -9   3   8 48840.1 3130.49   1
  -9  -3   7 284.293 455.877   1
  -9   3   7 364.288 622.579   1
  -9  -3   6 10465.9 1081.45   1
   9   3  -6 11418.3 1538.06   2
  -9   3   6 8471.48 1322.01   1
  -9  -3   5 3332.69 632.053   1
   9   3  -5 2462.72 893.008   2
  -9   3   5 4073.73 934.948   1
  -9  -3   4 6621.86 827.395   1
  -9   3   4 6132.79 1048.53   2
   9   3  -4 7347.56 1271.14   2
  -9   3   3 9015.62 1167.56   2
   9   3  -3 9352.84 1411.41   2
  -9  -3   3 7790.26 887.469   1
  -9   3   2 12537.0 1345.44   2
   9   3  -2 11974.8 1520.16   2
  -9   3   1 8886.32 1105.92   2
   9   3  -1 8484.19 1290.61   2
   9  -3  -1 9933.00 1233.26   2
   9   3   0 38519.0 2775.57   2
   9  -3   0 39917.1 2451.50   2
  -9  -3   0 36053.4 2078.93   1
  -9   3   0 32839.6 2197.05   2
  -9  -3  -1 42474.8 2395.00   1
   9   3   1 41614.8 2921.86   2
   9  -3   1 44450.3 2632.26   2
  -9   3  -1 42052.5 2486.34   2
   9   3   2 72578.7 4088.56   2
   9  -3   2 76644.6 3616.61   2
  -9  -3  -2 74493.4 3493.62   1
  -9   3  -2 73723.7 3451.03   2
   9   3   3 68757.6 4016.55   2
   9  -3   3 73200.6 3544.70   2
  -9  -3  -3 68971.3 3499.69   1
  -9   3  -3 76868.0 3521.46   2
   9   3   4 19242.6 2072.10   2
   9  -3   4 15589.1 1548.98   2
   9   3   5 74309.4 4297.56   2
   9  -3   5 72914.4 3633.16   2
   9   3   6 133.645 628.796   2
   9  -3   6 134.486 449.314   2
   9   3   7 64838.0 4142.87   2
   9   3   8 556.212 725.022   2
  -9   4  16 837.908 668.546   1
  -9  -4  16 271.832 546.873   1
  -9  -4  15 1912.41 794.467   1
  -9   4  15 487.487 833.360   1
  -9  -4  14 1825.05 768.578   1
  -9   4  14 4269.55 1216.34   1
  -9   4  13 10039.2 1682.49   1
  -9  -4  13 10352.1 1568.91   1
  -9   4  12 3787.09 1102.65   1
  -9  -4  12 5857.80 1112.08   1
  -9   4  11 29095.9 2664.60   1
  -9  -4  11 36912.4 2584.17   1
  -9   4  10 4446.38 1218.46   1
  -9  -4  10 4885.55 968.170   1
  -9  -4   9 85676.6 3924.06   1
  -9   4   9 96351.1 4777.47   1
  -9  -4   8 85162.6 3687.96   1
  -9   4   8 89812.4 4540.28   1
  -9  -4   7 56606.8 2658.83   1
   9   4  -7 52012.0 3424.86   2
  -9   4   7 52973.3 3355.98   1
  -9  -4   6 185056. 5793.77   1
   9   4  -6 181079. 7167.17   2
  -9   4   6 174541. 6913.65   1
  -9  -4   5 27828.4 1598.97   1
   9   4  -5 28395.0 2435.70   2
  -9   4   4 119158. 4921.76   2
   9   4  -4 128537. 5587.95   2
  -9  -4   4 118088. 3991.52   1
  -9   4   3 21637.5 1803.32   2
   9   4  -3 23214.1 2168.57   2
  -9  -4   3 21051.9 1292.67   1
  -9   4   2 19636.2 1662.30   2
   9   4  -2 18750.6 1922.89   2
   9   4  -1 19924.4 2054.36   2
  -9  -4   1 21409.2 1385.18   1
  -9   4   1 22887.0 1744.84   2
   9   4   0 10596.1 1514.87   2
  -9  -4   0 13225.6 1132.19   1
  -9   4   0 12941.2 1297.18   2
   9   4   1 2240.82 891.706   2
  -9  -4  -1 3769.58 694.211   1
   9  -4   1 2500.08 734.677   2
  -9   4  -1 3386.29 734.726   2
  -9  -4  -2 8218.84 1013.97   1
   9   4   2 9153.04 1460.36   2
   9  -4   2 9637.43 1158.37   2
  -9   4  -2 9751.98 1124.58   2
   9   4   3 1218.85 765.578   2
   9  -4   3 768.533 566.417   2
  -9   4  -3 1075.24 579.401   2
  -9  -4  -3-2.57325 368.346   1
   9   4   4 3733.86 1063.21   2
   9  -4   4 3696.70 833.647   2
   9   4   5 3115.47 1158.49   2
   9  -4   5 797.492 504.525   2
   9   4   6 42148.7 3304.24   2
   9   4   7 33.3322 613.260   2
   9   4   8 27671.9 2795.79   2
  -9  -5  15-951.903 682.532   1
  -9   5  15-513.050 804.018   1
  -9  -5  14 2807.24 852.284   1
  -9   5  14 2914.29 1102.36   1
  -9  -5  13 609.143 627.441   1
  -9   5  13-2165.29 998.470   1
  -9  -5  12 9421.58 1370.95   1
  -9   5  12 9924.32 1627.21   1
  -9   5  11 457.459 639.494   1
  -9  -5  11 112.846 572.519   1
  -9  -5  10 88766.6 4057.15   1
  -9   5  10 86330.4 4774.03   1
  -9   5   9 7365.31 1444.08   1
  -9  -5   9 5670.55 962.872   1
  -9  -5   8 102186. 4066.22   1
  -9   5   8 108938. 5240.77   1
  -9  -5   7 2944.56 670.627   1
   9   5  -7 2858.88 997.439   2
  -9   5   7 3252.50 1074.84   1
   9   5  -6 805.129 780.081   2
  -9   5   6 813.630 817.741   1
  -9  -5   6 200.760 300.341   1
  -9   5   5 4830.18 905.329   2
   9   5  -5 3318.92 1098.56   2
  -9  -5   5 4151.26 564.622   1
  -9  -5   4 56615.4 2155.55   1
  -9   5   4 60181.5 3139.80   2
   9   5  -4 53716.8 3467.49   2
  -9   5   3 8182.94 1087.19   2
   9   5  -3 6132.68 1290.22   2
  -9  -5   3 6266.90 599.317   1
  -9  -5   2 40977.1 1774.28   1
  -9   5   2 44624.2 2520.17   2
   9   5  -2 41828.6 3026.72   2
  -9  -5   2 45546.0 1797.73   1
   9   5  -1 8514.19 1384.32   2
  -9  -5   1 9049.58 804.225   1
  -9   5   1 11196.1 1170.51   2
   9   5   0 39979.9 3010.71   2
  -9  -5   0 42565.9 1994.34   1
  -9   5   0 42683.5 2363.79   2
  -9  -5  -1 9799.42 985.449   1
   9   5   1 10017.9 1548.09   2
  -9   5  -1 10542.0 1149.24   2
   9   5   2 161121. 6904.46   2
   9  -5   2 169187. 5745.86   2
  -9   5  -2 160879. 5550.77   2
   9   5   3 14463.7 1864.85   2
   9  -5   3 16473.0 1422.74   2
   9   5   4 189764. 7768.05   2
   9  -5   4 180399. 6152.29   2
   9   5   5 23557.1 2462.71   2
   9   5   6 70801.2 4455.05   2
   9   5   7 2475.33 944.843   2
  -9  -6  15-2180.85 929.977   1
  -9   6  15-2175.47 1046.30   1
  -9  -6  14 384.995 604.769   1
  -9   6  14-2559.29 1053.82   1
  -9   6  13-1000.19 836.734   1
  -9  -6  13 942.346 559.709   1
  -9   6  12 4725.08 1259.46   1
  -9  -6  12 3500.22 864.223   1
  -9   6  11 9977.67 1678.75   1
  -9  -6  11 7648.07 1167.21   1
  -9  -6  10 22541.9 1809.93   1
  -9   6  10 22175.3 2361.35   1
  -9  -6   9 15333.5 1426.52   1
  -9   6   9 19955.7 2187.43   1
  -9  -6   8 138854. 4761.21   1
  -9   6   8 134587. 6164.96   1
   9   6  -7 1082.10 902.335   2
  -9  -6   7 1411.94 406.544   1
  -9   6   7 200.596 758.312   1
  -9  -6   6 219229. 6048.67   1
   9   6  -6 211230. 8244.81   2
  -9   6   6 204459. 8054.22   1
  -9   6   5-694.121 448.953   2
   9   6  -5 248.722 698.946   2
  -9  -6   5 223.253 148.813   1
  -9   6   4 146094. 5495.34   2
   9   6  -4 139410. 6217.66   2
  -9   6   3 6359.81 952.665   2
   9   6  -3 3529.68 989.811   2
  -9   6   2 72209.0 3309.51   2
   9   6  -2 67198.1 4017.14   2
  -9   6   1 1212.24 488.109   2
  -9  -6   1 1441.64 261.079   1
   9   6  -1 2278.87 955.687   2
  -9  -6   1 1168.43 233.361   1
   9   6   0 23228.8 2332.79   2
  -9  -6   0 25187.4 1295.25   1
  -9   6   0 22497.0 1613.96   2
   9   6   1 2283.47 1032.31   2
  -9   6  -1 1004.88 472.174   2
   9   6   2 1509.68 910.897   2
   9   6   3 8106.02 1478.83   2
   9   6   4 16664.1 2142.47   2
   9   6   5 10643.8 1736.80   2
   9   6   6 31542.3 2945.00   2
   9   6   7 73.6774 639.455   2
  -9  -7  15 3389.75 1085.85   1
  -9   7  15 896.814 889.409   1
  -9   7  14 7521.50 1600.79   1
  -9  -7  14 6023.85 1252.67   1
  -9   7  13-37.4292 778.016   1
  -9  -7  13 261.253 531.798   1
  -9   7  12 9546.67 1659.67   1
  -9  -7  12 13040.1 1523.41   1
  -9   7  11 13165.0 1927.15   1
  -9  -7  11 10173.4 1265.85   1
  -9   7  10 73728.8 4435.08   1
  -9  -7  10 61981.6 3125.51   1
  -9   7   9 2174.09 1135.43   1
  -9  -7   9 1663.17 528.210   1
  -9  -7   8 69551.7 2758.53   1
   9   7  -8 67434.0 4147.71   2
  -9   7   8 63365.2 4081.95   1
  -9  -7   7 560.424 255.864   1
   9   7  -7 1117.83 909.948   2
  -9   7   7 1788.13 965.792   1
   9   7  -6 4177.20 1113.83   2
  -9   7   6 2240.87 985.676   1
  -9   7   5 1017.10 507.850   2
   9   7  -5 461.216 765.693   2
  -9   7   4 14569.6 1478.54   2
   9   7  -4 14690.3 1855.48   2
  -9   7   3 1675.38 623.506   2
   9   7  -3 1534.79 853.751   2
  -9   7   2 41346.7 2340.46   2
   9   7  -2 41479.9 3110.80   2
   9   7  -1 21434.1 2239.33   2
  -9   7   1 20807.2 1548.21   2
   9   7   0 81271.8 4584.19   2
  -9   7   0 80179.2 3268.47   2
   9   7   1 15558.2 1979.97   2
   9   7   2 131756. 6271.22   2
   9   7   3 19618.4 2297.44   2
   9   7   4 124237. 6230.73   2
   9   7   5 16704.5 2226.28   2
   9   7   6 31494.9 3034.65   2
   9   7   7 26977.6 2854.00   2
  -9   8  14 385.307 674.479   1
  -9   8  13 15757.3 2257.28   1
  -9   8  12 1919.28 1064.09   1
  -9   8  11 73435.0 4734.64   1
  -9   8  10 2054.70 953.213   1
  -9   8   9 41765.9 3366.85   1
   9   8  -8 29836.0 2654.49   2
  -9   8   8 24334.9 2521.26   1
   9   8  -7 13868.0 1884.61   2
  -9   8   7 15805.6 2021.43   1
   9   8  -6 81242.1 4674.91   2
  -9   8   6 89190.2 4821.83   1
  -9   8   5 19347.6 1729.75   2
   9   8  -5 20643.5 2221.79   2
  -9   8   4 65761.0 3259.40   2
   9   8  -4 63391.5 4007.06   2
  -9   8   3 17962.2 1530.27   2
   9   8  -3 17812.1 2041.42   2
  -9   8   2 31598.9 1941.76   2
   9   8  -2 26795.6 2547.78   2
   9   8  -1 2307.20 884.884   2
   9   8   0 9029.31 1535.36   2
   9   8   1 4628.95 1226.60   2
   9   8   2 1258.92 745.415   2
   9   8   3 185.847 654.283   2
   9   8   4 15126.7 2087.86   2
   9   8   5 2646.52 957.505   2
   9   8   6 21727.9 2625.51   2
  -9   9  13 43192.6 3777.30   1
  -9   9  12 75868.9 5037.58   1
  -9   9  11 15696.2 2286.26   1
  -9   9  10 58811.9 4184.43   1
  -9   9   9 1973.19 1022.34   1
   9   9  -8 10078.9 1602.73   2
  -9   9   8 8827.28 1589.63   1
   9   9  -7 2985.15 1001.15   2
  -9   9   7 5957.93 1376.73   1
   9   9  -6 44.5734 646.203   2
  -9   9   6 227.591 794.680   1
  -9   9   5 3682.78 806.243   2
   9   9  -5 793.186 741.377   2
  -9   9   4 12131.2 1296.50   2
   9   9  -4 12510.6 1754.30   2
   9   9  -3 1840.24 930.195   2
   9   9  -2 5726.27 1300.08   2
   9   9  -1 16856.5 2079.97   2
   9   9   0 4058.12 1146.92   2
   9   9   1 32519.7 2941.30   2
   9   9   2 2489.15 1039.81   2
   9   9   3 28712.4 2858.49   2
   9   9   4 3977.79 1306.97   2
   9   9   5 20292.9 2518.93   2
  -9  10  13 3597.35 1371.51   1
  -9  10  12 961.544 1070.23   1
  -9  10  11 36552.7 3400.03   1
  -9  10  10-577.428 800.269   1
  -9  10   9 17894.7 2296.61   1
   9  10  -8 164.312 481.209   2
  -9  10   8 214.274 649.096   1
   9  10  -7 8390.69 1570.13   2
  -9  10   7 7884.58 1500.89   1
   9  10  -6-4.65001 502.554   2
  -9  10   6-208.060 723.141   1
   9  10  -5 14883.5 1934.58   2
   9  10  -4 8557.99 1547.96   2
   9  10  -3 32245.4 2851.36   2
   9  10  -2 21164.8 2361.57   2
   9  10  -1 24785.9 2530.17   2
   9  10   0 10904.4 1785.17   2
   9  10   1 8038.34 1522.56   2
   9  10   2-975.736 828.644   2
   9  10   3 97.9347 725.886   2
   9  10   4 3534.71 1260.37   2
   9  10   5 1209.05 974.282   2
  -9  11  12 7685.73 1735.66   1
  -9  11  11 78602.1 5167.79   1
  -9  11  10-752.747 912.968   1
  -9  11   9 9750.03 1776.88   1
   9  11  -9 12104.5 1916.16   2
   9  11  -8-1136.17 728.287   2
  -9  11   8 226.088 587.288   1
   9  11  -7-522.882 728.207   2
  -9  11   7 1017.89 718.196   1
   9  11  -6-329.624 504.676   2
  -9  11   6 675.947 597.777   1
   9  11  -5 1224.63 724.291   2
   9  11  -4 1781.52 874.795   2
   9  11  -3 8602.59 1562.84   2
   9  11  -2 9031.13 1663.43   2
   9  11  -1 22301.3 2468.58   2
   9  11   0 2517.44 912.729   2
   9  11   1 20403.5 2424.08   2
   9  11   2 468.066 710.211   2
   9  11   3 11923.5 1999.41   2
   9  11   4 2726.13 1022.24   2
  -9  12  10 16006.2 2416.40   1
   9  12  -9 19948.8 2416.93   2
  -9  12   9 22922.2 2688.76   1
   9  12  -8 4136.16 1131.94   2
  -9  12   8 3071.26 1099.61   1
   9  12  -7 4216.40 1216.35   2
  -9  12   7 6625.97 1433.23   1
   9  12  -6 344.473 780.438   2
  -9  12   6 693.822 763.587   1
   9  12  -5 17199.2 2204.25   2
   9  12  -4 76.1456 455.333   2
   9  12  -3 50243.4 3806.31   2
   9  12  -2 614.289 707.976   2
   9  12  -1 45344.0 3683.82   2
   9  12   0 3527.06 1218.44   2
   9  12   1 3171.36 1231.68   2
   9  12   2 535.087 694.013   2
  -9  13   9 6700.34 1542.90   1
   9  13  -9 7279.82 1595.05   2
   9  13  -8 26652.7 2836.90   2
  -9  13   8 32985.3 3249.36   1
   9  13  -7 1500.56 716.580   2
  -9  13   7-34.1706 828.883   1
   9  13  -6 847.504 771.021   2
  -9  13   6 2240.27 1168.66   1
   9  13  -5 216.380 616.225   2
  -9  13   5-265.207 731.156   1
   9  13  -4 5642.44 1282.64   2
   9  13  -3 4038.17 1197.24   2
   9  13  -2 5199.59 1288.39   2
   9  13  -1 29070.0 2945.72   2
   9  13   0 695.517 864.091   2
   9  13   1 24635.3 2830.34   2
   9  14  -6 34578.9 3233.80   2
  -9  14   6 32200.1 3247.51   1
   9  14  -5 54229.7 4119.24   2
  -9  14   5 55095.6 4208.20   1
   9  14  -4 14714.7 2190.80   2
   9  14  -3 33188.8 3168.72   2
   9  14  -2 12638.2 2041.96   2
 -10   0  15 1071.66 987.592   1
 -10   0  14 13530.0 1977.26   1
 -10   0  13 1925.45 1088.76   1
 -10   0  12 131.849 617.981   1
 -10   0  11-250.834 518.888   1
 -10   0  10 19712.1 1980.83   1
 -10   0   9-373.640 465.080   1
 -10   0   8 4938.32 984.488   1
 -10   0   7 152.071 407.152   1
 -10   0   6 18127.7 1645.96   1
 -10   0   5-264.656 351.166   1
  10   0  -4 1003.82 709.953   2
  10   0  -3 441.522 579.577   2
  10   0  -2 133101. 5720.01   2
  10   0  -1 33.8149 647.974   2
  10   0   0 31323.7 2495.87   2
  10   0   1 928.456 680.462   2
  10   0   2 290.965 502.607   2
  10   0   3 619.560 568.336   2
  10   0   4 31508.4 2582.90   2
  10   0   5-178.106 620.878   2
  10   0   6 29237.1 2587.53   2
  10   0   7-2109.35 930.335   2
 -10   1  15 12482.0 1959.53   1
 -10  -1  15 16480.7 2137.90   1
 -10   1  14 101626. 5545.26   1
 -10  -1  14 98919.6 5354.64   1
 -10   1  13 18602.7 2239.69   1
 -10  -1  13 20101.2 2205.05   1
 -10   1  12 65350.6 4025.46   1
 -10  -1  12 61798.4 3799.55   1
 -10   1  11 9004.92 1511.10   1
 -10  -1  11 7471.31 1278.78   1
 -10   1  10 11212.6 1546.24   1
 -10  -1  10 10532.2 1408.94   1
 -10  -1   9 13432.6 1518.89   1
 -10   1   9 11227.9 1499.35   1
 -10   1   8 1344.89 567.544   1
 -10  -1   8 1063.71 554.287   1
 -10   1   7 544.240 497.714   1
 -10  -1   7 286.223 408.812   1
 -10  -1   6 1362.47 524.953   1
 -10   1   6 2803.83 768.067   1
  10   1  -5 20828.7 2088.20   2
 -10   1   5 23337.4 1968.60   1
 -10  -1   5 24900.5 1856.38   1
  10   1  -4 2974.42 908.427   2
 -10  -1   4 3053.08 715.071   1
  10   1  -3 47098.4 3140.60   2
  10  -1  -3 46149.8 3043.97   2
  10   1  -2 31610.1 2524.50   2
  10  -1  -2 29611.2 2368.80   2
  10   1  -1 26679.5 2300.62   2
  10  -1  -1 23622.7 2103.78   2
  10   1   0 114586. 5335.95   2
  10  -1   0 119184. 5217.91   2
  10   1   1 5246.50 1154.73   2
  10  -1   1 6418.40 1143.34   2
 -10  -1  -1 7112.31 1077.27   1
  10   1   2 104191. 5059.54   2
  10  -1   2 105290. 4873.87   2
  10   1   3 140.532 582.923   2
  10  -1   3-1021.59 600.426   2
  10   1   4 33285.0 2716.12   2
  10  -1   4 31342.1 2507.29   2
  10   1   5 1977.17 899.740   2
  10  -1   5 1596.96 818.197   2
  10   1   6 31803.9 2757.13   2
  10  -1   6 37242.2 2788.39   2
  10   1   7-717.409 671.089   2
  10  -1   7 687.471 745.562   2
 -10  -2  15 4003.90 1157.85   1
 -10   2  15 3603.04 1210.13   1
 -10  -2  14 1353.74 806.277   1
 -10   2  14-582.718 1085.74   1
 -10  -2  13 15859.8 1925.46   1
 -10   2  13 15918.1 2069.96   1
 -10   2  12 17310.6 2092.57   1
 -10  -2  12 20442.2 2068.95   1
 -10   2  11 5396.33 1245.12   1
 -10  -2  11 6491.73 1186.91   1
 -10   2  10 52681.1 3467.38   1
 -10  -2  10 50369.1 3069.95   1
 -10   2   9 622.151 751.381   1
 -10  -2   9 1772.07 640.790   1
 -10  -2   8 45540.8 2726.46   1
 -10   2   8 50200.4 3187.18   1
 -10   2   7 2694.87 804.111   1
 -10  -2   7 3657.06 826.462   1
 -10   2   6 23497.8 2074.48   1
 -10  -2   6 24925.8 1821.53   1
 -10  -2   5 913.743 482.434   1
  10   2  -5 624.233 678.506   2
 -10   2   5 858.435 594.413   1
  10   2  -4 69571.4 3975.19   2
 -10  -2   4 67919.0 3177.99   1
  10   2  -3 625.168 617.435   2
  10   2  -2 81466.1 4335.64   2
  10  -2  -2 82016.3 4094.58   2
  10   2  -1 927.892 739.494   2
  10  -2  -1 811.073 609.539   2
 -10  -2   0 13732.5 1385.22   1
  10   2   0 15088.4 1784.04   2
  10  -2   0 15007.1 1640.59   2
 -10  -2  -1 858.607 573.015   1
  10   2   1 972.494 804.936   2
  10  -2   1 1605.89 719.373   2
  10   2   2-1309.41 732.882   2
  10  -2   2 527.717 500.880   2
  10   2   3 1093.90 659.716   2
  10  -2   3 624.741 619.314   2
  10   2   4 6688.90 1329.31   2
  10  -2   4 8207.07 1251.03   2
  10  -2   5 14201.9 1671.14   2
  10   2   5 12686.8 1826.18   2
  10   2   6 10581.3 1669.59   2
  10  -2   6 11715.5 1508.30   2
  10   2   7 15368.6 2025.06   2
 -10  -3  15 31618.6 2909.92   1
 -10   3  15 33873.6 3176.44   1
 -10  -3  14 110.206 646.895   1
 -10   3  14 1442.71 892.409   1
 -10   3  13 34564.4 3073.90   1
 -10  -3  13 32806.1 2726.81   1
 -10  -3  12 11022.0 1583.18   1
 -10   3  12 12039.7 1813.85   1
 -10   3  11 48809.9 3512.70   1
 -10  -3  11 47195.6 3068.00   1
 -10   3  10 2071.88 926.412   1
 -10  -3  10 2156.04 743.612   1
 -10  -3   9 80155.5 3842.02   1
 -10   3   9 87429.3 4570.94   1
 -10   3   8 882.976 707.194   1
 -10  -3   8 910.427 571.095   1
 -10  -3   7 32645.9 2088.51   1
 -10   3   7 29279.1 2495.30   1
 -10  -3   6 5386.58 842.896   1
  10   3  -6 4477.02 1136.65   2
 -10   3   6 4733.48 1050.24   1
  10   3  -5 15656.8 1877.27   2
 -10   3   5 19894.4 1960.90   1
 -10  -3   5 18253.4 1439.60   1
  10   3  -4 6191.38 1272.00   2
 -10  -3   4 4660.08 791.503   1
  10   3  -3 73764.7 4188.69   2
 -10  -3   3 77178.9 3234.01   1
  10   3  -2 1040.95 795.351   2
 -10  -3   1 32087.2 2005.97   1
  10   3  -1 33056.3 2707.81   2
  10  -3  -1 38082.4 2560.78   2
  10   3   0 15480.2 1897.32   2
 -10  -3   0 19311.6 1546.93   1
  10  -3   0 18447.9 1732.74   2
 -10   3   0 20176.4 1773.84   2
  10   3   1 28107.7 2541.58   2
  10  -3   1 28260.5 2208.20   2
 -10   3  -1 30154.4 2184.73   2
  10   3   2 66001.3 4047.89   2
  10  -3   2 70757.1 3640.67   2
  10   3   3 15871.1 1999.23   2
  10  -3   3 18425.0 1762.72   2
  10   3   4 35441.6 2985.93   2
  10  -3   4 33474.8 2406.10   2
  10   3   5 19886.9 2229.40   2
  10  -3   5 19496.1 1832.41   2
  10   3   6 23139.8 2466.31   2
 -10  -4  15 2182.08 908.710   1
 -10   4  15 2002.28 1048.70   1
 -10   4  14-643.152 795.548   1
 -10  -4  14-1245.24 725.878   1
 -10   4  13-1813.37 861.681   1
 -10  -4  13-375.059 584.411   1
 -10   4  12 21129.5 2334.29   1
 -10  -4  12 20250.2 1986.45   1
 -10   4  11 2088.28 828.501   1
 -10  -4  11 2131.14 770.151   1
 -10  -4  10 41492.3 2646.60   1
 -10   4  10 37067.0 3044.59   1
 -10  -4   9 75211.5 3503.67   1
 -10   4   9 61093.1 3956.39   1
 -10  -4   8 70670.2 3278.28   1
 -10   4   8 71350.6 4127.49   1
 -10  -4   7 165778. 5505.23   1
  10   4  -7 163085. 6947.53   2
 -10  -4   6 70772.1 2999.40   1
  10   4  -6 68709.7 4115.03   2
 -10   4   6 67187.0 3893.31   1
 -10  -4   5 176060. 5567.89   1
  10   4  -5 167386. 7111.11   2
  10   4  -4 59667.7 3799.39   2
 -10  -4   4 63906.6 2680.11   1
  10   4  -3 47466.2 3327.27   2
 -10  -4   3 52040.8 2348.75   1
 -10  -4   2 37890.7 2004.56   1
  10   4  -2 40313.2 3052.48   2
 -10  -4   2 40671.3 2031.53   1
 -10   4   2 42984.0 2645.80   2
 -10   4   1-71.5906 571.531   2
  10   4  -1 260.611 691.857   2
  10   4   0 15867.9 1913.57   2
 -10   4   0 13843.3 1446.57   2
  10   4   1 1273.34 678.383   2
  10  -4   1 2345.13 696.206   2
 -10   4  -1 2566.55 727.697   2
  10   4   2-318.861 687.680   2
  10  -4   2-84.8178 423.963   2
  10   4   3 1067.10 691.357   2
  10  -4   3 327.049 468.986   2
  10   4   4 1818.36 887.998   2
  10  -4   4 2465.35 719.927   2
  10   4   5 11926.6 1782.65   2
  10   4   6 3884.23 1194.91   2
 -10  -5  15 19681.3 2244.01   1
 -10   5  15 16214.8 2282.33   1
 -10  -5  14 1457.86 675.812   1
 -10   5  14-183.503 695.618   1
 -10  -5  13 9770.85 1456.38   1
 -10   5  13 9127.91 1759.35   1
 -10   5  12-1062.29 855.043   1
 -10  -5  12-180.540 489.354   1
 -10   5  11 35827.2 3061.60   1
 -10  -5  11 30987.1 2364.12   1
 -10   5  10 351.521 748.122   1
 -10  -5  10 339.359 635.651   1
 -10  -5   9 50096.7 2747.40   1
 -10   5   9 48387.4 3469.93   1
 -10   5   8 984.701 1033.76   1
 -10  -5   8 1687.72 631.810   1
 -10  -5   7 17037.6 1331.69   1
  10   5  -7 17387.4 2115.15   2
 -10   5   7 16589.2 2047.57   1
  10   5  -6 967.907 1039.63   2
 -10   5   6 3020.52 1172.47   1
 -10  -5   6 1501.35 516.312   1
 -10  -5   5 34541.6 1705.25   1
  10   5  -5 33698.4 2857.66   2
 -10  -5   4-321.126 364.652   1
  10   5  -4 3206.09 1178.65   2
 -10   5   3 65492.0 3421.13   2
  10   5  -3 65210.3 4049.89   2
 -10  -5   3 66711.3 2478.60   1
 -10   5   2 381.198 490.006   2
  10   5  -2 20.7703 653.490   2
 -10  -5   2 626.792 246.143   1
  10   5  -1 26069.4 2475.54   2
 -10   5   1 22736.8 1831.46   2
  10   5   0-2152.28 954.163   2
 -10   5   0-707.896 440.653   2
  10   5   1 19281.4 2189.07   2
  10   5   2 1193.81 723.738   2
  10   5   3 45449.2 3472.60   2
  10   5   4 6095.35 1387.14   2
  10   5   5 43050.4 3493.10   2
  10   5   6 2263.26 893.942   2
 -10   6  14-2436.42 1152.90   1
 -10   6  13 6195.57 1382.33   1
 -10  -6  13 8869.06 1366.46   1
 -10   6  12 341.512 665.782   1
 -10  -6  12 197.318 482.043   1
 -10  -6  11 44756.5 2769.65   1
 -10   6  11 41764.3 3452.90   1
 -10  -6  10 5138.06 887.229   1
 -10   6  10 5006.19 1325.24   1
 -10  -6   9 145125. 5113.37   1
 -10   6   9 129467. 6335.62   1
 -10  -6   8 790.292 504.829   1
 -10   6   8 212.072 799.230   1
 -10  -6   7 274374. 7689.86   1
  10   6  -7 257491. 9848.53   2
 -10   6   7 275661. 9936.61   1
  10   6  -6 6717.43 1467.58   2
 -10  -6   6 5051.86 556.040   1
 -10   6   6 5951.85 1273.99   1
  10   6  -5 207468. 8324.86   2
  10   6  -4 7579.09 1546.47   2
 -10   6   3 71129.9 3532.17   2
  10   6  -3 71819.8 4340.19   2
 -10   6   2 4680.70 882.864   2
  10   6  -2 3094.07 1045.10   2
  10   6  -1 9712.77 1614.03   2
  10   6   0 5066.43 1206.43   2
  10   6   1 260.449 879.281   2
  10   6   2 2225.75 924.223   2
  10   6   3 517.756 698.570   2
  10   6   4-1146.03 861.226   2
  10   6   5 22529.7 2590.66   2
 -10   7  14-53.4655 902.609   1
 -10   7  13 23051.5 2685.47   1
 -10   7  12 1044.79 995.895   1
 -10   7  11 21513.3 2497.93   1
 -10   7  10 17458.1 2211.31   1
 -10   7   9 43786.6 3439.75   1
  10   7  -8 1989.55 837.419   2
 -10   7   8 742.130 884.818   1
  10   7  -7 13330.6 1883.27   2
 -10   7   7 15243.9 2036.78   1
  10   7  -6 934.063 984.543   2
 -10   7   6 1225.37 1053.50   1
  10   7  -5 4104.59 1245.66   2
  10   7  -4 7330.94 1469.03   2
 -10   7   3 36788.6 2395.79   2
  10   7  -3 34820.8 3015.47   2
  10   7  -2 5641.73 1381.16   2
  10   7  -1 26651.1 2604.01   2
  10   7   0 2815.16 997.031   2
  10   7   1 16175.9 2076.94   2
  10   7   2 2461.15 957.931   2
  10   7   3 41554.7 3476.51   2
  10   7   4 1917.55 1100.03   2
  10   7   5 51261.2 3990.36   2
 -10   8  13 383.016 862.654   1
 -10   8  12 43058.6 3694.50   1
 -10   8  11 2821.41 1012.03   1
 -10   8  10 92615.8 5391.64   1
 -10   8   9 7696.04 1568.97   1
  10   8  -8 35506.3 3067.14   2
 -10   8   8 42246.9 3399.36   1
  10   8  -7 63191.8 4185.97   2
 -10   8   7 60482.7 4103.04   1
  10   8  -6 7948.51 1552.73   2
 -10   8   6 7380.11 1469.78   1
  10   8  -5 49160.4 3636.81   2
  10   8  -4 34373.3 3000.63   2
  10   8  -3 12319.1 1826.46   2
  10   8  -2 52488.2 3798.96   2
  10   8  -1 2915.55 1061.46   2
  10   8   0 20207.5 2369.22   2
  10   8   1 1050.59 929.304   2
  10   8   2 481.367 784.902   2
  10   8   3 951.915 874.298   2
  10   8   4 3801.74 1267.82   2
 -10   9  12 12447.3 2141.93   1
 -10   9  11 51938.3 4053.18   1
 -10   9  10 846.904 895.574   1
 -10   9   9 20041.3 2462.20   1
  10   9  -8 163.572 506.591   2
 -10   9   8-2779.43 1044.95   1
  10   9  -7-965.583 724.490   2
 -10   9   7-1112.48 733.622   1
  10   9  -6 2101.05 961.341   2
 -10   9   6 1276.96 737.422   1
  10   9  -5 3317.92 1024.49   2
  10   9  -4 8669.19 1576.20   2
  10   9  -3 54838.5 3930.12   2
  10   9  -2 857.263 782.807   2
  10   9  -1 49115.7 3733.73   2
  10   9   0 37977.0 3352.64   2
  10   9   1 29430.7 2963.60   2
  10   9   2 47341.8 3795.94   2
  10   9   3 28478.4 3003.46   2
 -10  10  11 1201.99 922.758   1
 -10  10  10 6725.19 1492.70   1
 -10  10   9 4303.25 1303.08   1
  10  10  -9 4801.95 1285.72   2
  10  10  -8-412.599 570.916   2
 -10  10   8-994.430 743.455   1
  10  10  -7 1712.16 892.663   2
 -10  10   7 977.281 946.542   1
  10  10  -6 532.891 596.011   2
 -10  10   6-372.068 923.167   1
  10  10  -5 1203.71 761.067   2
  10  10  -4 14144.9 1981.93   2
  10  10  -3 1380.67 798.228   2
  10  10  -2 47306.5 3714.34   2
  10  10  -1 4453.81 1170.97   2
  10  10   0 35883.3 3245.87   2
  10  10   1 1074.00 859.064   2
  10  10   2 804.642 785.934   2
 -10  11  10 35724.3 3436.44   1
 -10  11   9 622.737 732.914   1
  10  11  -9 2405.99 1025.62   2
  10  11  -8 1159.87 853.145   2
 -10  11   8 1916.32 857.928   1
  10  11  -7 845.345 671.098   2
 -10  11   7-10.9699 737.622   1
  10  11  -6 405.488 676.095   2
 -10  11   6 339.368 739.790   1
  10  11  -5 243.758 556.856   2
  10  11  -4 2184.74 867.627   2
  10  11  -3 792.005 822.899   2
  10  11  -2 41396.1 3545.83   2
  10  11  -1 4744.64 1349.60   2
  10  11   0 76845.8 5033.67   2
  10  11   1 3514.92 1142.86   2
  10  12  -8 3192.61 1149.96   2
 -10  12   8 4802.36 1395.36   1
  10  12  -7 189.835 769.344   2
 -10  12   7-648.014 837.402   1
  10  12  -6 2664.57 975.539   2
 -10  12   6 5672.05 1414.82   1
  10  12  -5-27.6667 462.845   2
  10  12  -4 10725.5 1823.33   2
  10  12  -3 274.686 630.194   2
  10  12  -2 25578.1 2827.19   2
  10  12  -1 8295.89 1651.20   2
 -11   0  14 19.3196 584.928   1
 -11   0  13-1265.27 857.275   1
 -11   0  12 171.024 623.059   1
 -11   0  11 3358.83 1019.26   1
 -11   0  10-491.666 608.367   1
 -11   0   9 9691.42 1394.86   1
 -11   0   8 81.5216 430.231   1
 -11   0   7 2879.85 818.504   1
 -11   0   6 572.519 496.363   1
 -11   0   5 1076.97 506.252   1
  11   0  -4 27.1750 653.084   2
 -11   0   4 452.654 431.181   1
  11   0  -3 20337.6 2119.43   2
  11   0  -2 95.3240 663.269   2
  11   0  -1 68350.8 4020.49   2
  11   0   0 1887.90 904.869   2
  11   0   1 1524.97 867.801   2
  11   0   2 2109.93 810.446   2
  11   0   3 21799.6 2263.55   2
  11   0   4-66.8346 627.473   2
  11   0   5 34332.0 2868.46   2
 -11  -1  14 7875.30 1496.90   1
 -11   1  14 6300.84 1428.79   1
 -11   1  13 34664.7 3010.99   1
 -11  -1  13 33411.0 2827.67   1
 -11   1  12 272.835 692.986   1
 -11  -1  12-1002.54 639.338   1
 -11   1  11 43966.6 3212.55   1
 -11  -1  11 42464.0 3027.38   1
 -11   1  10 1601.45 745.330   1
 -11  -1  10 1939.77 742.484   1
 -11  -1   9 23438.0 2037.87   1
 -11   1   9 19033.2 2025.18   1
 -11   1   8 4236.89 1038.35   1
 -11  -1   8 6295.56 1133.97   1
 -11   1   7-354.984 541.901   1
 -11  -1   7 31.6282 471.714   1
 -11  -1   6 10199.0 1265.58   1
 -11   1   6 7530.54 1201.95   1
  11   1  -5 3212.13 972.585   2
 -11   1   5 3382.60 858.787   1
 -11  -1   5 2394.51 707.020   1
  11   1  -4 17365.9 2027.03   2
 -11  -1   4 22861.0 1863.19   1
  11   1  -3 22117.3 2237.92   2
  11  -1  -3 22068.6 2181.59   2
  11   1  -2 15032.8 1880.20   2
  11  -1  -2 12671.9 1706.90   2
  11   1  -1 103694. 5149.50   2
  11  -1  -1 98766.8 4913.88   2
  11   1   0 6526.06 1314.10   2
  11  -1   0 6407.55 1250.19   2
  11   1   1 194592. 7828.14   2
  11  -1   1 198250. 7641.01   2
  11   1   2 15153.6 1954.69   2
  11  -1   2 11542.8 1649.56   2
  11   1   3 124524. 5928.36   2
  11  -1   3 120011. 5598.26   2
  11   1   4 20635.1 2265.95   2
  11  -1   4 18984.7 2042.26   2
  11   1   5 20609.6 2272.76   2
  11  -1   5 20067.5 2093.45   2
 -11  -2  14 2195.38 848.216   1
 -11   2  14 1681.99 908.165   1
 -11  -2  13 2309.40 867.785   1
 -11   2  13 1974.58 948.000   1
 -11  -2  12 1255.77 706.280   1
 -11   2  12 63.9751 583.106   1
 -11   2  11 14392.3 1872.97   1
 -11  -2  11 11006.2 1483.89   1
 -11   2  10 3074.09 977.039   1
 -11  -2  10 2479.38 689.952   1
 -11  -2   9 62567.8 3424.62   1
 -11   2   9 63164.7 3832.86   1
 -11   2   8 1507.03 784.171   1
 -11  -2   8 122.854 455.702   1
 -11   2   7 74252.0 4038.55   1
 -11  -2   7 68035.0 3462.36   1
 -11  -2   6 2381.67 685.358   1
 -11   2   6 3103.81 839.116   1
  11   2  -5 42959.1 3213.69   2
 -11   2   5 41938.8 2908.76   1
 -11  -2   5 47877.1 2679.80   1
  11   2  -4 1385.96 782.151   2
 -11  -2   4 1943.21 665.676   1
  11   2  -3 49125.1 3471.99   2
  11   2  -2 5896.22 1287.21   2
  11  -2  -2 7509.66 1260.81   2
  11   2  -1 30797.9 2714.56   2
  11  -2  -1 34107.9 2607.86   2
  11   2   0 1596.40 872.054   2
  11  -2   0 1469.64 720.456   2
  11   2   1 3206.28 1105.81   2
  11  -2   1 775.049 603.933   2
  11   2   2 919.190 761.049   2
  11  -2   2 1455.37 725.652   2
  11   2   3 11823.5 1803.51   2
  11  -2   3 8652.92 1405.07   2
  11   2   4 1936.55 807.269   2
  11  -2   4 1980.46 836.390   2
  11   2   5 19554.1 2268.00   2
 -11   3  14 34429.2 3133.28   1
 -11  -3  14 28012.6 2649.54   1
 -11  -3  13 13561.7 1738.71   1
 -11   3  13 14515.3 2015.77   1
 -11   3  12 23343.0 2548.99   1
 -11  -3  12 25307.4 2290.22   1
 -11   3  11 19256.1 2207.22   1
 -11  -3  11 16760.7 1810.43   1
 -11  -3  10 25976.1 2104.80   1
 -11   3  10 21595.8 2323.73   1
 -11   3   9-65.5917 658.625   1
 -11  -3   9 179.652 453.621   1
 -11   3   8 9355.30 1538.19   1
 -11  -3   8 9688.23 1258.43   1
 -11  -3   7 4517.20 864.122   1
 -11   3   7 5136.75 1213.50   1
  11   3  -6 13632.9 1897.49   2
 -11   3   6 14367.7 1762.02   1
 -11  -3   6 13892.3 1345.86   1
  11   3  -5 18649.8 2114.93   2
 -11   3   5 18846.4 1983.79   1
 -11  -3   5 18775.0 1534.13   1
  11   3  -4 70770.9 4302.83   2
 -11  -3   4 74088.7 3301.96   1
  11   3  -3 552.182 753.075   2
 -11  -3   3-802.359 559.371   1
  11   3  -2 65329.5 4092.55   2
  11   3  -1 23351.8 2371.20   2
  11   3   0 17395.8 2094.29   2
  11  -3   0 19195.3 1891.73   2
  11   3   1 35569.8 2960.67   2
  11  -3   1 32942.3 2499.91   2
  11   3   2 26761.1 2599.74   2
  11  -3   2 25055.3 2176.20   2
  11   3   3 3616.99 1104.07   2
  11  -3   3 6996.16 1188.16   2
  11   3   4 49047.5 3671.05   2
 -11   4  14 15038.9 2231.89   1
 -11  -4  14 14110.2 1826.69   1
 -11   4  13 915.167 976.038   1
 -11  -4  13 1192.94 769.609   1
 -11   4  12 12177.7 1921.37   1
 -11  -4  12 14808.4 1731.22   1
 -11  -4  11 13337.1 1564.61   1
 -11   4  11 13310.7 1923.48   1
 -11  -4  10 29103.2 2197.18   1
 -11   4  10 30517.6 2764.29   1
 -11  -4   9 27383.0 2016.59   1
 -11   4   9 30227.1 2723.98   1
 -11  -4   8 79424.7 3545.94   1
 -11   4   8 77353.4 4469.76   1
 -11  -4   7 50166.0 2593.80   1
 -11   4   7 49086.3 3411.12   1
 -11  -4   6 115599. 4233.02   1
  11   4  -6 107963. 5583.30   2
 -11   4   6 105887. 5311.02   1
  11   4  -5 31056.6 2847.41   2
 -11  -4   5 35033.3 1979.37   1
  11   4  -4 61913.1 4047.81   2
 -11  -4   4 61422.3 2729.76   1
  11   4  -3 49757.0 3608.16   2
 -11  -4   3 51665.2 2442.16   1
  11   4  -2 1077.99 939.571   2
 -11  -4   2 671.610 423.658   1
  11   4  -1 26223.8 2600.19   2
  11   4   0 496.821 645.186   2
  11   4   1-543.704 736.631   2
  11   4   2 704.771 728.017   2
  11  -4   2-102.944 419.207   2
  11   4   3 7797.54 1553.68   2
  11   4   4-225.476 593.550   2
 -11   5  13-163.615 765.785   1
 -11   5  12 22660.8 2594.87   1
 -11   5  11 1758.63 962.407   1
 -11   5  10 5124.15 1238.10   1
 -11   5   9-337.348 724.193   1
 -11   5   8 6591.81 1425.62   1
  11   5  -7 847.904 922.196   2
 -11   5   7 585.638 771.461   1
  11   5  -6 2730.41 996.287   2
 -11   5   6 1910.09 1007.68   1
  11   5  -5 2746.36 1162.06   2
  11   5  -4 16383.7 2076.53   2
  11   5  -3 101.148 711.039   2
  11   5  -2 24384.8 2553.57   2
  11   5  -1-135.684 547.829   2
  11   5   0 2168.22 949.584   2
  11   5   1-92.0266 807.036   2
  11   5   2-616.964 764.323   2
  11   5   3 4123.70 1246.02   2
  11   5   4 8650.05 1655.50   2
 -11   6  13 1236.34 946.348   1
 -11   6  12 23080.0 2666.72   1
 -11   6  11 1063.99 899.495   1
 -11   6  10 64231.7 4314.39   1
 -11   6   9-187.644 788.376   1
 -11   6   8 136968. 6521.49   1
  11   6  -7 5496.95 1352.85   2
 -11   6   7 3678.22 1133.27   1
  11   6  -6 160843. 7282.00   2
 -11   6   6 156292. 6962.82   1
  11   6  -5 779.293 795.057   2
  11   6  -4 88807.2 5075.08   2
  11   6  -3 16103.6 2102.45   2
  11   6  -2 16989.3 2128.51   2
  11   6  -1 9263.70 1617.09   2
  11   6   0-2123.54 1006.46   2
  11   6   1 409.270 622.682   2
  11   6   2 827.771 731.004   2
  11   6   3 18757.5 2381.25   2
 -11   7  12 32699.7 3202.10   1
 -11   7  11 76.1185 672.448   1
 -11   7  10 11753.5 1870.95   1
 -11   7   9 1115.30 953.052   1
  11   7  -8 2816.46 1037.71   2
 -11   7   8 2294.27 1041.93   1
  11   7  -7 3020.08 1218.88   2
 -11   7   7 4240.63 1316.60   1
  11   7  -6 2974.68 1154.38   2
 -11   7   6 2202.88 1098.90   1
  11   7  -5 5186.77 1242.69   2
  11   7  -4 16945.4 2194.27   2
  11   7  -3 17217.0 2200.49   2
  11   7  -2 20546.9 2385.27   2
  11   7  -1 1293.52 859.956   2
  11   7   0 12936.1 1960.19   2
  11   7   1 2669.04 1022.40   2
  11   7   2 9329.17 1796.81   2
  11   7   3 560.237 723.138   2
 -11   8  11 10089.1 1872.02   1
 -11   8  10 13674.0 2022.02   1
 -11   8   9 38004.3 3341.78   1
  11   8  -8 17963.3 2252.14   2
 -11   8   8 19068.9 2366.51   1
  11   8  -7 23115.2 2566.21   2
 -11   8   7 25923.8 2731.01   1
  11   8  -6 50066.7 3834.51   2
 -11   8   6 49290.2 3745.10   1
  11   8  -5 30513.2 2977.96   2
  11   8  -4 12891.0 1943.63   2
  11   8  -3 66354.8 4471.59   2
  11   8  -2 5.22623 682.935   2
  11   8  -1 46256.6 3705.96   2
  11   8   0 1339.68 715.254   2
  11   8   1 2632.69 1135.60   2
  11   8   2 5179.39 1487.73   2
 -11   9  10 13714.5 2138.60   1
 -11   9   9 4494.43 1277.33   1
  11   9  -8 1614.74 820.153   2
 -11   9   8 491.852 665.676   1
  11   9  -7 70.1422 624.737   2
 -11   9   7-2032.56 938.147   1
  11   9  -6 692.955 625.622   2
 -11   9   6 1232.25 804.249   1
  11   9  -5 4670.55 1193.94   2
  11   9  -4 16838.9 2211.70   2
  11   9  -3 4669.21 1174.05   2
  11   9  -2 70465.3 4715.40   2
  11   9  -1 23558.5 2676.65   2
  11   9   0 77252.2 5009.45   2
  11   9   1 68370.8 4747.68   2
 -11  10   9 11402.0 1972.88   1
  11  10  -8 677.495 789.907   2
 -11  10   8 506.434 811.734   1
  11  10  -7 6390.78 1418.07   2
 -11  10   7 5402.42 1326.18   1
  11  10  -6-269.974 546.228   2
 -11  10   6-977.188 853.351   1
  11  10  -5 12644.2 1985.81   2
  11  10  -4-575.656 711.880   2
  11  10  -3 34829.0 3285.96   2
  11  10  -2 1455.70 979.022   2
  11  10  -1 23859.7 2737.46   2
  11  11  -7 1166.18 1082.30   2
 -11  11   7 1028.99 866.099   1
  11  11  -6 847.749 768.546   2
 -11  11   6 1013.82 773.673   1
  11  11  -5 2905.60 1078.43   2
  11  11  -4-854.666 832.256   2
  11  11  -3 26964.0 2939.98   2
 -12   0  13-306.017 657.196   1
 -12   0  12 14874.3 1958.18   1
 -12   0  11-860.821 710.739   1
 -12   0  10 41038.1 3030.50   1
 -12   0   9 530.400 623.802   1
 -12   0   8 90508.0 4542.13   1
 -12   0   7 335.012 623.739   1
 -12   0   6 102444. 4804.03   1
 -12   0   5-184.577 681.186   1
 -12   0   4 24898.4 2154.68   1
  12   0  -3-2261.15 1002.54   2
  12   0  -2 32659.6 2819.45   2
  12   0  -1 416.729 849.794   2
  12   0   0 9481.72 1631.37   2
  12   0   1 984.755 818.325   2
  12   0   2 15078.5 1929.99   2
 -12   1  13 714.260 748.585   1
 -12  -1  13 914.678 745.228   1
 -12   1  12 60062.1 3999.51   1
 -12  -1  12 55997.0 3672.07   1
 -12   1  11 1100.84 586.765   1
 -12  -1  11 1457.35 887.743   1
 -12   1  10 41553.8 3139.23   1
 -12  -1  10 40266.3 2905.34   1
 -12   1   9 1004.23 704.295   1
 -12  -1   9 20.5832 506.688   1
 -12   1   8 1020.77 667.474   1
 -12  -1   8 1477.03 724.993   1
 -12   1   7 546.165 743.026   1
 -12  -1   7 2047.16 769.114   1
 -12  -1   6 5224.33 995.825   1
 -12   1   6 6609.05 1255.38   1
 -12   1   5-980.042 718.816   1
 -12  -1   5-788.465 592.751   1
  12   1  -4 15630.1 1983.00   2
 -12  -1   4 17634.4 1731.12   1
  12   1  -3 8000.03 1490.18   2
  12   1  -2 72132.7 4397.89   2
  12  -1  -2 70209.1 4196.63   2
  12   1  -1 10843.2 1683.70   2
  12  -1  -1 11806.4 1728.88   2
  12   1   0 100711. 5361.27   2
  12  -1   0 105151. 5264.93   2
  12   1   1 4373.71 1200.94   2
  12  -1   1 7340.10 1400.89   2
  12   1   2 125414. 6124.71   2
  12  -1   2 118923. 5779.39   2
 -12   2  13 24919.8 2691.13   1
 -12  -2  13 28426.3 2596.50   1
 -12   2  12 5699.95 1323.08   1
 -12  -2  12 3782.52 1056.56   1
 -12   2  11 14875.5 1993.81   1
 -12  -2  11 13466.9 1675.86   1
 -12   2  10 15125.1 1954.34   1
 -12  -2  10 18711.4 1885.99   1
 -12   2   9 5043.49 1258.46   1
 -12  -2   9 4831.90 1004.46   1
 -12  -2   8 51305.6 3040.79   1
 -12   2   8 52046.3 3497.58   1
 -12  -2   7 13827.0 1529.80   1
 -12   2   7 14891.7 1816.58   1
 -12   2   6 50639.8 3377.90   1
 -12  -2   6 50910.5 2925.95   1
 -12  -2   5 12180.6 1365.04   1
  12   2  -5 10285.9 1662.20   2
 -12   2   5 13044.4 1725.87   1
  12   2  -4 17296.7 2155.16   2
 -12  -2   4 20198.6 1745.32   1
  12   2  -3 179.327 785.342   2
 -12  -2   3-395.987 589.723   1
  12   2  -2 18644.6 2200.06   2
  12   2  -1 199.484 644.786   2
  12  -2  -1-1412.74 875.070   2
  12   2   0 1546.45 900.371   2
  12  -2   0-7.88910 722.381   2
  12   2   1 1099.09 808.743   2
  12  -2   1-2214.07 811.032   2
  12   2   2 10348.3 1723.50   2
  12  -2   2 10617.0 1547.08   2
 -12   3  13 16011.4 2248.30   1
 -12   3  12 31549.5 3006.29   1
 -12   3  11 4508.65 1177.39   1
 -12   3  10 34766.4 3004.74   1
 -12   3   9 162.764 689.480   1
 -12   3   8 632.780 787.872   1
 -12   3   7 248.225 725.686   1
  12   3  -6 4893.41 1314.83   2
 -12   3   6 3919.12 1068.25   1
  12   3  -5 2068.73 987.580   2
 -12   3   5 1849.29 823.100   1
  12   3  -4 4430.55 1245.69   2
  12   3  -3 35056.1 3052.23   2
  12   3  -2 1393.97 924.118   2
  12   3  -1 42774.6 3416.34   2
  12   3   0 5836.06 1370.45   2
  12   3   1 26514.6 2694.56   2
  12  -3   1 27717.5 2381.20   2
  12   3   2 12531.1 1922.66   2
 -12   4  12 1462.14 792.121   1
 -12   4  11 29797.8 2936.95   1
 -12   4  10 2516.99 993.900   1
 -12   4   9 5664.18 1240.66   1
 -12   4   8 14643.3 1925.63   1
 -12   4   7 25150.6 2487.01   1
  12   4  -6 21965.3 2473.67   2
 -12   4   6 17078.3 2057.33   1
  12   4  -5 41262.6 3352.85   2
 -12   4   5 37191.0 3007.78   1
  12   4  -4 26070.3 2677.52   2
  12   4  -3 14448.9 2052.34   2
  12   4  -2 26495.2 2682.53   2
  12   4  -1 1292.58 856.083   2
  12   4   0 2026.51 1080.58   2
  12   4   1-108.800 610.817   2
  12   4   2 3238.31 1163.90   2
 -12   5  12 2055.63 977.005   1
 -12   5  11 3919.67 1344.67   1
 -12   5  10 4856.42 1259.61   1
 -12   5   9-112.449 674.252   1
 -12   5   8 2229.93 940.581   1
  12   5  -7 445.329 793.365   2
 -12   5   7 41.6096 698.462   1
  12   5  -6 1644.55 947.099   2
 -12   5   6 2076.90 1026.39   1
  12   5  -5 438.295 767.192   2
  12   5  -4 6149.48 1377.40   2
  12   5  -3 11086.9 1791.57   2
  12   5  -2 678.588 675.207   2
  12   5  -1 2112.01 981.655   2
  12   5   0 1426.91 920.031   2
  12   5   1-1249.95 836.211   2
 -12   6  11 15990.6 2262.27   1
 -12   6  10-2155.09 1018.54   1
 -12   6   9 13894.4 2008.76   1
 -12   6   8 1009.52 820.773   1
  12   6  -7 49499.9 3836.59   2
 -12   6   7 45608.1 3572.54   1
  12   6  -6 1448.74 899.488   2
 -12   6   6 2026.18 1046.71   1
  12   6  -5 64927.5 4458.46   2
  12   6  -4 2956.54 1169.79   2
  12   6  -3 34489.2 3185.43   2
  12   6  -2 3243.35 1017.26   2
  12   6  -1 9608.43 1768.05   2
  12   6   0 346.203 796.925   2
 -12   7  10 13150.5 2106.23   1
 -12   7   9 7711.12 1646.71   1
  12   7  -8 515.307 795.218   2
 -12   7   8 1580.78 989.323   1
  12   7  -7-588.118 968.340   2
 -12   7   7 768.904 776.436   1
  12   7  -6 148.175 862.617   2
 -12   7   6 267.082 776.251   1
  12   7  -5 13666.2 2062.85   2
  12   7  -4-159.138 827.512   2
  12   7  -3 17884.8 2319.54   2
  12   7  -2 1610.87 959.977   2
  12   7  -1 19854.2 2525.09   2
 -12   8   9 21521.0 2625.22   1
  12   8  -8 26114.8 2890.31   2
 -12   8   8 29382.4 2995.96   1
  12   8  -7 13742.0 2192.27   2
 -12   8   7 16711.6 2267.76   1
  12   8  -6 20753.5 2611.01   2
 -12   8   6 30961.3 2986.57   1
  12   8  -5 25479.4 2797.25   2
  12   8  -4 8895.76 1797.23   2
  12   8  -3 9254.09 1721.48   2
  12   8  -2 12003.5 2023.70   2
  12   9  -6 4382.75 1318.47   2
 -12   9   6 5379.29 1451.48   1
  12   9  -5 3817.51 1207.55   2
  12   9  -4 1415.95 879.389   2
 -13   0  11 85470.3 4757.57   1
 -13   0  10-366.055 840.404   1
 -13   0   9 187223. 7513.60   1
 -13   0   8 79.4161 821.500   1
 -13   0   7 188755. 7367.88   1
 -13   0   6-409.867 864.081   1
 -13   0   5 44657.3 3073.97   1
 -13   0   4-1248.88 932.249   1
  13   0  -3 8216.82 1543.73   2
  13   0  -2-199.151 768.433   2
  13   0  -1 881.589 778.855   2
 -13   1  11 33760.7 2933.41   1
 -13   1  10 4101.38 1219.29   1
 -13   1   9 10632.7 1647.52   1
 -13  -1   9 6743.19 1243.50   1
 -13   1   8 4594.95 1194.74   1
 -13  -1   8 3721.53 1040.68   1
 -13   1   7 3707.47 1040.61   1
 -13   1   6 1497.97 800.794   1
 -13   1   5 18579.0 2035.22   1
  13   1  -4 5332.42 1311.92   2
 -13   1   4 4167.18 1097.61   1
  13   1  -3 31165.1 2911.87   2
  13   1  -2 7883.11 1597.81   2
  13  -1  -2 10345.3 1700.35   2
  13   1  -1 25710.3 2657.92   2
  13  -1  -1 25465.2 2517.58   2
 -13   2  10 28818.4 2743.01   1
 -13   2   9 43840.6 3329.38   1
 -13   2   8 19394.5 2211.56   1
 -13   2   7 54933.5 3714.01   1
 -13   2   6 20965.9 2244.53   1
  13   2  -5 9745.16 1746.84   2
 -13   2   5 6116.08 1261.96   1
  13   2  -4 18015.8 2281.83   2
  13   2  -3-447.091 672.526   2
  13   2  -2 7590.46 1558.76   2
  13   2  -1 2030.53 911.777   2
 -13   3  10 649.482 700.964   1
 -13   3   9 839.665 738.596   1
 -13   3   8 1637.62 925.982   1
 -13   3   7 16634.2 2076.58   1
 -13   3   6 10505.0 1685.11   1
  13   3  -5 16303.4 2219.38   2
 -13   3   5 15067.4 1958.50   1
  13   3  -4 335.922 733.464   2
  13   3  -3 15140.7 2130.73   2
  13   3  -2 27210.2 2826.45   2
 -13   4   9-754.775 794.071   1
 -13   4   8 3741.54 1150.28   1
 -13   4   7 9591.32 1620.86   1
  13   4  -6 15760.9 2148.99   2
 -13   4   6 12818.0 1838.96   1
  13   4  -5 2522.03 1109.24   2
 -13   4   5 3547.59 1072.33   1
  13   4  -4 19952.6 2468.93   2
  13   4  -3 1625.32 951.375   2
  13   4  -2 11095.4 1905.85   2
 -13   5   8 689.934 783.449   1
 -13   5   7-94.7188 631.474   1
  13   5  -6-320.206 744.702   2
 -13   5   6-836.238 772.718   1
  13   5  -5 5104.09 1441.20   2
 -13   5   5 6496.94 1434.89   1
  13   5  -4 16132.1 2265.11   2
  13   5  -3 4847.29 1345.53   2
   0   0   0    0.00    0.00   0
;
_shelx_hkl_checksum     89174
 
# END of CIF

#============================================================================
#============================================================================
#============================================================================
#\#CIF_1.1
 
#  CIF produced by WinGX routine CIF_UPDATE
#  Created on 2014-12-07 at 19:29:03
#  Using CIFtbx version 3.0.4  1 Sep 2006
 
#  Dictionary name : cif_core.dic
#  Dictionary vers : 2.4.3
#  Request file    : c:\wingx\files\archive.reqdat
#  CIF files read  : co209b project
 
#------------------  SECTION 2. COMPOUND(S) DETAILS -------------------------#
 
data_3a-co209b
 
_audit_creation_date                    2014-12-07T19:29:03-00:00
_audit_creation_method                  'WinGX routine CIF_UPDATE'
_audit_conform_dict_name                cif_core.dic
_audit_conform_dict_version             2.4.3
_audit_conform_dict_location            ftp://ftp.iucr.org/pub/cif_core.dic
_publ_requested_category                FM
 
#----------------------------------------------------------------------------#
#                   CHEMICAL INFORMATION                                     #
#----------------------------------------------------------------------------#
 
_chemical_name_systematic
;
 ?
;
_chemical_formula_moiety                'C36 H83 P4 Pd2, F6 P'
_chemical_formula_sum                   'C36 H83 F6 P5 Pd2'
_chemical_formula_weight                997.67
 
#----------------------------------------------------------------------------#
#                   UNIT CELL INFORMATION                                    #
#----------------------------------------------------------------------------#
 
_symmetry_cell_setting                  triclinic
_symmetry_space_group_name_H-M          'P -1'
_symmetry_space_group_name_Hall         '-P 1'
_symmetry_Int_Tables_number             2
loop_
    _symmetry_equiv_pos_as_xyz
'x, y, z'
'-x, -y, -z'
 
_cell_length_a                          16.4861(12)
_cell_length_b                          16.7956(10)
_cell_length_c                          19.2901(10)
_cell_angle_alpha                       86.673(4)
_cell_angle_beta                        65.675(6)
_cell_angle_gamma                       88.083(5)
_cell_volume                            4858.7(6)
_cell_formula_units_Z                   4
_cell_measurement_temperature           110(2)
_cell_measurement_reflns_used           7578
_cell_measurement_theta_min             3.4075
_cell_measurement_theta_max             29.527
 
#----------------------------------------------------------------------------#
#                   CRYSTAL INFORMATION                                      #
#----------------------------------------------------------------------------#
 
_exptl_crystal_description              plate
_exptl_crystal_colour                   colourless
_exptl_crystal_size_max                 0.51
_exptl_crystal_size_mid                 0.3
_exptl_crystal_size_min                 0.03
_exptl_crystal_density_diffrn           1.364
_exptl_crystal_F_000                    2080
loop_
    _exptl_crystal_face_index_h
    _exptl_crystal_face_index_k
    _exptl_crystal_face_index_l
    _exptl_crystal_face_perp_dist
-1 2 -25 0.1459
1 -2 25 0.1459
-21 -4 -21 0.1941
21 4 21 0.1941
-20 -6 1 0.2528
20 6 -1 0.2528
2 -24 -1 0.0139
-2 24 1 0.0139
 
_exptl_special_details
;
 ?
;
 
#----------------------------------------------------------------------------#
#                   ABSORPTION CORRECTION                                    #
#----------------------------------------------------------------------------#
 
_exptl_absorpt_coefficient_mu           0.95
_exptl_absorpt_correction_type          analytical
_exptl_absorpt_process_details
;
        CrysAlisPro, Agilent Technologies,
        Version 1.171.36.28 (release 01-02-2013 CrysAlis171 .NET)
        (compiled Feb  1 2013,16:14:44)
Analytical numeric absorption correction using a multifaceted crystal
                        model based on expressions derived by R.C. Clark & J.S.
        (Clark, R. C. & Reid, J. S. (1995). Acta Cryst. A51, 887-897)
;
_exptl_absorpt_correction_T_min         0.698
_exptl_absorpt_correction_T_max         0.972
_shelx_estimated_absorpt_T_min          0.643
_shelx_estimated_absorpt_T_max          0.972
 
#----------------------------------------------------------------------------#
#                   DATA COLLECTION                                          #
#----------------------------------------------------------------------------#
 
_diffrn_ambient_temperature             110(2)
_diffrn_radiation_wavelength            0.71073
_diffrn_radiation_type                  MoK\a
_diffrn_radiation_monochromator         graphite
_diffrn_detector_area_resol_mean        10.4685
_diffrn_orient_matrix_ub_11             0.0050978
_diffrn_orient_matrix_ub_12             -0.0416049
_diffrn_orient_matrix_ub_13             0.0059191
_diffrn_orient_matrix_ub_21             -0.0298991
_diffrn_orient_matrix_ub_22             0.0024131
_diffrn_orient_matrix_ub_23             0.0388026
_diffrn_orient_matrix_ub_31             -0.0361889
_diffrn_orient_matrix_ub_32             -0.0072748
_diffrn_orient_matrix_ub_33             -0.0095653
_diffrn_measurement_device_type         'Xcalibur, Atlas, Gemini'
_diffrn_measurement_method              '\w scans'
_diffrn_reflns_av_R_equivalents         0.0584
_diffrn_reflns_av_unetI/netI            0.1018
_diffrn_reflns_number                   43029
_diffrn_reflns_limit_h_min              -19
_diffrn_reflns_limit_h_max              22
_diffrn_reflns_limit_k_min              -23
_diffrn_reflns_limit_k_max              22
_diffrn_reflns_limit_l_min              -25
_diffrn_reflns_limit_l_max              26
_diffrn_reflns_theta_min                3.407
_diffrn_reflns_theta_max                29.527
_diffrn_reflns_theta_full               25.242
_diffrn_measured_fraction_theta_full
                                        0.997
_diffrn_measured_fraction_theta_max
                                        0.836
_diffrn_reflns_Laue_measured_fraction_full
                                        0.997
_diffrn_reflns_Laue_measured_fraction_max
                                        0.836
_diffrn_reflns_point_group_measured_fraction_full
                                        0.997
_diffrn_reflns_point_group_measured_fraction_max
                                        0.836
_reflns_Friedel_coverage                0
_reflns_number_total                    22681
_reflns_number_gt                       13460
_reflns_threshold_expression            'I > 2\s(I)'
 
#----------------------------------------------------------------------------#
#                   COMPUTER PROGRAMS USED                                   #
#----------------------------------------------------------------------------#
 
_computing_data_collection
;
        CrysAlisPro, Agilent Technologies,
        Version 1.171.36.28 (release 01-02-2013 CrysAlis171 .NET)
        (compiled Feb  1 2013,16:14:44)
;
_computing_cell_refinement
;
        CrysAlisPro, Agilent Technologies,
        Version 1.171.36.28 (release 01-02-2013 CrysAlis171 .NET)
        (compiled Feb  1 2013,16:14:44)
;
_computing_data_reduction
;
        CrysAlisPro, Agilent Technologies,
        Version 1.171.36.28 (release 01-02-2013 CrysAlis171 .NET)
        (compiled Feb  1 2013,16:14:44)
;
_computing_structure_refinement         'SHELXL-2013 (Sheldrick, 2013)'
 
#----------------------------------------------------------------------------#
#                   STRUCTURE SOLUTION                                       #
#----------------------------------------------------------------------------#
 
_atom_sites_solution_hydrogens          mixed
 
#----------------------------------------------------------------------------#
#                   REFINEMENT INFORMATION                                   #
#----------------------------------------------------------------------------#
 
_refine_special_details
;
  F1 F5 F6 and F1P F5P F6P are disordered over two sites with occupancies 
0.77:0.23; H02A H07A and H02B H07B are disordered over two sites with 
occupancies 0.50:0.50; C1B C2B C3B C4B C5B C6B C7B C8B C9B C10B P2B and 
C1P C2P C3P C4P C5P C6P C7P C8P C9P C10P P2P are disordered over two 
sites with occupancies 0.65:0.25.

The anisotropic ellipsoids of the atoms disordered  were 
elongated, so the SIMU/DELU restraints and EADP constraint 
commands in the SHELXL2013 software were used.
;
_refine_ls_structure_factor_coef        Fsqd
_refine_ls_matrix_type                  full
_refine_ls_weighting_scheme             calc
_refine_ls_weighting_details
              'w=1/[\s^2^(Fo^2^)+(0.0971P)^2^+6.0457P] where P=(Fo^2^+2Fc^2^)/3'
_refine_ls_hydrogen_treatment           constr
_refine_ls_extinction_method            none
_refine_ls_number_reflns                22681
_refine_ls_number_parameters            900
_refine_ls_number_restraints            162
_refine_ls_R_factor_all                 0.1253
_refine_ls_R_factor_gt                  0.0748
_refine_ls_wR_factor_ref                0.2353
_refine_ls_wR_factor_gt                 0.1976
_refine_ls_goodness_of_fit_ref          1.087
_refine_ls_restrained_S_all             1.089
_refine_ls_shift/su_max                 0.001
_refine_ls_shift/su_mean                0
_refine_diff_density_max                2.624
_refine_diff_density_min                -1.483
_refine_diff_density_rms                0.159
 
#----------------------------------------------------------------------------#
#                   CONSTRAINTS AND RESTRAINTS                               #
#----------------------------------------------------------------------------#
 
 
#----------------------------------------------------------------------------#
#                   ATOMIC TYPES, COORDINATES AND THERMAL PARAMETERS         #
#----------------------------------------------------------------------------#
 
loop_
    _atom_type_symbol
    _atom_type_description
    _atom_type_scat_dispersion_real
    _atom_type_scat_dispersion_imag
    _atom_type_scat_source
C C 0.0033 0.0016 'International Tables Vol C Tables 4.2.6.8 and 6.1.1.4'
H H 0 0 'International Tables Vol C Tables 4.2.6.8 and 6.1.1.4'
F F 0.0171 0.0103 'International Tables Vol C Tables 4.2.6.8 and 6.1.1.4'
P P 0.1023 0.0942 'International Tables Vol C Tables 4.2.6.8 and 6.1.1.4'
Pd Pd -0.9988 1.0072 'International Tables Vol C Tables 4.2.6.8 and 6.1.1.4'
 
loop_
    _atom_site_label
    _atom_site_type_symbol
    _atom_site_fract_x
    _atom_site_fract_y
    _atom_site_fract_z
    _atom_site_U_iso_or_equiv
    _atom_site_adp_type
    _atom_site_occupancy
    _atom_site_site_symmetry_order
    _atom_site_calc_flag
    _atom_site_refinement_flags_posn
    _atom_site_refinement_flags_adp
    _atom_site_refinement_flags_occupancy
    _atom_site_disorder_assembly
    _atom_site_disorder_group
Pd1A Pd 0.35857(3) 0.12892(3) 0.80186(3) 0.02677(14) Uani 1 1 d . . . . .
Pd2A Pd 0.36661(3) -0.01906(3) 0.75239(3) 0.02453(13) Uani 1 1 d . . . . .
H03 H 0.3648 0.0312 0.8427 0.037 Uiso 1 1 d R U . . .
H02B H 0.3742 0.0671 0.7251 0.037 Uiso 0.5 1 d R U P . .
H01 H 0.2984 0.0553 0.7674 0.037 Uiso 1 1 d R U . . .
H02A H 0.4333 0.0386 0.7689 0.037 Uiso 0.5 1 d R U P . .
P1A P 0.30454(11) 0.21423(9) 0.89800(9) 0.0212(3) Uani 1 1 d . . . . .
P2A P 0.39594(11) 0.23828(9) 0.71343(9) 0.0235(3) Uani 1 1 d . . . . .
P3A P 0.27602(11) -0.11604(9) 0.74576(9) 0.0231(3) Uani 1 1 d . . . . .
P4A P 0.47702(11) -0.11531(9) 0.73631(9) 0.0240(3) Uani 1 1 d . . . . .
C1A C 0.3023(4) 0.3136(3) 0.8527(3) 0.0217(12) Uani 1 1 d . . . . .
H1AA H 0.2437 0.3217 0.8504 0.026 Uiso 1 1 calc R U . . .
H1AB H 0.308 0.3546 0.8853 0.026 Uiso 1 1 calc R U . . .
C2A C 0.3758(5) 0.3265(3) 0.7720(3) 0.0279(14) Uani 1 1 d . . . . .
H2AA H 0.4318 0.3399 0.7758 0.033 Uiso 1 1 calc R U . . .
H2AB H 0.359 0.3725 0.746 0.033 Uiso 1 1 calc R U . . .
C3A C 0.3233(4) 0.2526(4) 0.6600(3) 0.0278(14) Uani 1 1 d . . . . .
C4A C 0.3198(5) 0.1746(4) 0.6236(4) 0.0356(16) Uani 1 1 d . . . . .
H4AA H 0.3798 0.1607 0.5868 0.053 Uiso 1 1 calc R U . . .
H4AB H 0.28 0.1816 0.5974 0.053 Uiso 1 1 calc R U . . .
H4AC H 0.2976 0.1318 0.6633 0.053 Uiso 1 1 calc R U . . .
C5A C 0.3509(5) 0.3215(4) 0.5994(4) 0.0372(16) Uani 1 1 d . . . . .
H5AA H 0.3025 0.3336 0.5833 0.056 Uiso 1 1 calc R U . . .
H5AB H 0.4045 0.306 0.5554 0.056 Uiso 1 1 calc R U . . .
H5AC H 0.3632 0.3687 0.6208 0.056 Uiso 1 1 calc R U . . .
C6A C 0.2292(5) 0.2701(5) 0.7190(4) 0.0392(17) Uani 1 1 d . . . . .
H6AA H 0.2111 0.2275 0.7591 0.059 Uiso 1 1 calc R U . . .
H6AB H 0.1878 0.2729 0.6942 0.059 Uiso 1 1 calc R U . . .
H6AC H 0.2285 0.3211 0.7415 0.059 Uiso 1 1 calc R U . . .
C7A C 0.5162(4) 0.2480(4) 0.6458(3) 0.0333(16) Uani 1 1 d . . . . .
C8A C 0.5394(5) 0.1898(5) 0.5821(4) 0.0436(19) Uani 1 1 d . . . . .
H8AA H 0.5157 0.1371 0.6042 0.065 Uiso 1 1 calc R U . . .
H8AB H 0.6042 0.1861 0.5545 0.065 Uiso 1 1 calc R U . . .
H8AC H 0.5131 0.209 0.5469 0.065 Uiso 1 1 calc R U . . .
C9A C 0.5704(5) 0.2229(5) 0.6920(4) 0.0407(18) Uani 1 1 d . . . . .
H9AA H 0.634 0.2281 0.6594 0.061 Uiso 1 1 calc R U . . .
H9AB H 0.5574 0.1673 0.7109 0.061 Uiso 1 1 calc R U . . .
H9AC H 0.5543 0.2573 0.7351 0.061 Uiso 1 1 calc R U . . .
C10A C 0.5442(5) 0.3315(4) 0.6115(4) 0.0411(18) Uani 1 1 d . . . . .
H51 H 0.5145 0.347 0.5779 0.062 Uiso 1 1 calc R U . . .
H52 H 0.6089 0.3326 0.5821 0.062 Uiso 1 1 calc R U . . .
H53 H 0.5273 0.369 0.6524 0.062 Uiso 1 1 calc R U . . .
C11A C 0.3756(4) 0.2238(4) 0.9522(3) 0.0284(14) Uani 1 1 d . . . . .
C12A C 0.4013(5) 0.1409(4) 0.9749(4) 0.0400(17) Uani 1 1 d . . . . .
H12A H 0.443 0.1465 0.9987 0.06 Uiso 1 1 calc R U . . .
H12B H 0.4295 0.1098 0.9295 0.06 Uiso 1 1 calc R U . . .
H12C H 0.3477 0.1136 1.0112 0.06 Uiso 1 1 calc R U . . .
C13A C 0.4589(5) 0.2664(5) 0.8996(4) 0.0388(17) Uani 1 1 d . . . . .
H13A H 0.4902 0.2352 0.8546 0.058 Uiso 1 1 calc R U . . .
H13B H 0.4977 0.2727 0.9262 0.058 Uiso 1 1 calc R U . . .
H13C H 0.4432 0.3191 0.8838 0.058 Uiso 1 1 calc R U . . .
C14A C 0.3319(5) 0.2730(4) 1.0232(4) 0.0376(17) Uani 1 1 d . . . . .
H14A H 0.3755 0.2828 1.0441 0.056 Uiso 1 1 calc R U . . .
H14B H 0.2815 0.2436 1.0616 0.056 Uiso 1 1 calc R U . . .
H14C H 0.3106 0.3241 1.0093 0.056 Uiso 1 1 calc R U . . .
C15A C 0.1848(5) 0.1982(4) 0.9666(4) 0.0309(15) Uani 1 1 d . . . . .
C16A C 0.1778(5) 0.1270(4) 1.0216(4) 0.0380(17) Uani 1 1 d . . . . .
H16A H 0.2094 0.081 0.9927 0.057 Uiso 1 1 calc R U . . .
H16B H 0.115 0.1137 1.051 0.057 Uiso 1 1 calc R U . . .
H16C H 0.2045 0.1404 1.0564 0.057 Uiso 1 1 calc R U . . .
C17A C 0.1358(5) 0.1758(5) 0.9186(4) 0.0412(18) Uani 1 1 d . . . . .
H17A H 0.0758 0.1577 0.9523 0.062 Uiso 1 1 calc R U . . .
H17B H 0.1685 0.1329 0.8856 0.062 Uiso 1 1 calc R U . . .
H17C H 0.1316 0.2225 0.8873 0.062 Uiso 1 1 calc R U . . .
C18A C 0.1398(5) 0.2709(4) 1.0107(3) 0.0364(17) Uani 1 1 d . . . . .
H18A H 0.1642 0.2801 1.0481 0.055 Uiso 1 1 calc R U . . .
H18B H 0.0756 0.2618 1.0372 0.055 Uiso 1 1 calc R U . . .
H18C H 0.1505 0.3177 0.9754 0.055 Uiso 1 1 calc R U . . .
C19A C 0.4229(4) -0.2113(4) 0.7448(4) 0.0297(14) Uani 1 1 d . . . . .
H19A H 0.468 -0.2498 0.7135 0.036 Uiso 1 1 calc R U . . .
H19B H 0.4003 -0.2319 0.7985 0.036 Uiso 1 1 calc R U . . .
C20A C 0.3453(5) -0.2073(3) 0.7198(4) 0.0280(14) Uani 1 1 d . . . . .
H20A H 0.3069 -0.2541 0.7431 0.034 Uiso 1 1 calc R U . . .
H20B H 0.3699 -0.211 0.6638 0.034 Uiso 1 1 calc R U . . .
C21A C 0.1801(5) -0.1425(4) 0.8380(4) 0.0325(15) Uani 1 1 d . . . . .
C22A C 0.2208(5) -0.1801(4) 0.8919(4) 0.0361(16) Uani 1 1 d . . . . .
H22A H 0.2454 -0.2329 0.875 0.054 Uiso 1 1 calc R U . . .
H22B H 0.1744 -0.1851 0.9439 0.054 Uiso 1 1 calc R U . . .
H22C H 0.2683 -0.1458 0.891 0.054 Uiso 1 1 calc R U . . .
C23A C 0.1175(5) -0.2045(5) 0.8325(5) 0.0456(19) Uani 1 1 d . . . . .
H23A H 0.0776 -0.2241 0.8838 0.068 Uiso 1 1 calc R U . . .
H23B H 0.1525 -0.2492 0.8036 0.068 Uiso 1 1 calc R U . . .
H23C H 0.0821 -0.1801 0.8065 0.068 Uiso 1 1 calc R U . . .
C24A C 0.1288(5) -0.0664(5) 0.8738(4) 0.0438(19) Uani 1 1 d . . . . .
H24A H 0.169 -0.0306 0.8826 0.066 Uiso 1 1 calc R U . . .
H24B H 0.0793 -0.0808 0.9225 0.066 Uiso 1 1 calc R U . . .
H24C H 0.1054 -0.0395 0.8393 0.066 Uiso 1 1 calc R U . . .
C25A C 0.2350(5) -0.1004(4) 0.6682(4) 0.0317(15) Uani 1 1 d . . . . .
C26A C 0.2072(6) -0.1792(4) 0.6462(4) 0.046(2) Uani 1 1 d . . . . .
H26A H 0.2569 -0.2174 0.6321 0.068 Uiso 1 1 calc R U . . .
H26B H 0.1912 -0.1684 0.6029 0.068 Uiso 1 1 calc R U . . .
H26C H 0.1558 -0.2016 0.6896 0.068 Uiso 1 1 calc R U . . .
C27A C 0.3125(5) -0.0654(5) 0.5973(4) 0.0422(18) Uani 1 1 d . . . . .
H27A H 0.2926 -0.054 0.5563 0.063 Uiso 1 1 calc R U . . .
H27B H 0.362 -0.104 0.5806 0.063 Uiso 1 1 calc R U . . .
H27C H 0.3324 -0.016 0.6098 0.063 Uiso 1 1 calc R U . . .
C28A C 0.1582(5) -0.0394(4) 0.6920(4) 0.0412(18) Uani 1 1 d . . . . .
H28A H 0.105 -0.0637 0.7319 0.062 Uiso 1 1 calc R U . . .
H28B H 0.1457 -0.0227 0.6478 0.062 Uiso 1 1 calc R U . . .
H28C H 0.1749 0.0072 0.7113 0.062 Uiso 1 1 calc R U . . .
C29A C 0.5731(5) -0.1136(4) 0.6386(4) 0.0339(16) Uani 1 1 d . . . . .
C30A C 0.6302(7) -0.1885(5) 0.6228(6) 0.081(4) Uani 1 1 d . . . . .
H30A H 0.6704 -0.1881 0.5686 0.122 Uiso 1 1 calc R U . . .
H30B H 0.5919 -0.2354 0.6361 0.122 Uiso 1 1 calc R U . . .
H30C H 0.6652 -0.1905 0.6534 0.122 Uiso 1 1 calc R U . . .
C31A C 0.5332(6) -0.1055(7) 0.5815(4) 0.072(3) Uani 1 1 d . . . . .
H31A H 0.5091 -0.1569 0.578 0.108 Uiso 1 1 calc R U . . .
H31B H 0.5792 -0.0888 0.5316 0.108 Uiso 1 1 calc R U . . .
H31C H 0.4853 -0.0654 0.5974 0.108 Uiso 1 1 calc R U . . .
C32A C 0.6312(6) -0.0397(5) 0.6285(4) 0.049(2) Uani 1 1 d . . . . .
H32A H 0.6735 -0.0329 0.5751 0.073 Uiso 1 1 calc R U . . .
H32B H 0.664 -0.0474 0.6608 0.073 Uiso 1 1 calc R U . . .
H32C H 0.593 0.0078 0.6432 0.073 Uiso 1 1 calc R U . . .
C33A C 0.5190(5) -0.1246(4) 0.8143(4) 0.0342(16) Uani 1 1 d . . . . .
C34A C 0.5676(7) -0.2039(6) 0.8151(5) 0.068(3) Uani 1 1 d . . . . .
H34A H 0.5795 -0.2091 0.8609 0.102 Uiso 1 1 calc R U . . .
H34B H 0.624 -0.205 0.7698 0.102 Uiso 1 1 calc R U . . .
H34C H 0.5304 -0.2481 0.8151 0.102 Uiso 1 1 calc R U . . .
C35A C 0.5742(6) -0.0515(6) 0.8102(5) 0.059(3) Uani 1 1 d . . . . .
H35A H 0.631 -0.0536 0.7653 0.089 Uiso 1 1 calc R U . . .
H35B H 0.5855 -0.0513 0.8562 0.089 Uiso 1 1 calc R U . . .
H35C H 0.5414 -0.0029 0.8063 0.089 Uiso 1 1 calc R U . . .
C36A C 0.4365(5) -0.1216(5) 0.8894(3) 0.0396(18) Uani 1 1 d . . . . .
H36A H 0.4548 -0.1181 0.9314 0.059 Uiso 1 1 calc R U . . .
H36B H 0.4017 -0.1701 0.8971 0.059 Uiso 1 1 calc R U . . .
H36C H 0.4001 -0.0748 0.8878 0.059 Uiso 1 1 calc R U . . .
Pd2B Pd 0.11491(4) 0.73743(3) 0.29629(3) 0.02690(14) Uani 1 1 d . . . . .
H05 H 0.0335 0.6535 0.2787 0.04 Uiso 1 1 d R U . A .
H06 H 0.1964 0.6325 0.2751 0.04 Uiso 1 1 d R U . . .
H07A H 0.107 0.6467 0.3564 0.04 Uiso 0.5 1 d R U P . .
H07B H 0.1465 0.6852 0.2042 0.04 Uiso 0.5 1 d R U P . .
P1B P 0.03915(14) 0.49310(11) 0.23159(13) 0.0399(5) Uani 1 1 d . . . . .
P3B P 0.14545(11) 0.84486(9) 0.20753(8) 0.0217(3) Uani 1 1 d . . . . .
P4B P 0.05604(11) 0.82410(9) 0.39176(8) 0.0217(3) Uani 1 1 d . . . . .
Pd1B Pd 0.12932(10) 0.58907(7) 0.24460(8) 0.0281(2) Uani 0.646(2) 1 d . U P A 1
P2B P 0.2393(2) 0.49288(15) 0.22712(18) 0.0281(2) Uani 0.646(2) 1 d . U P A 1
C1B C 0.1868(12) 0.3971(10) 0.2247(9) 0.050(4) Uani 0.646(2) 1 d . U P A 1
H1D H 0.2332 0.3612 0.1907 0.06 Uiso 0.646(2) 1 calc R U P A 1
H1E H 0.1623 0.3712 0.2765 0.06 Uiso 0.646(2) 1 calc R U P A 1
C2B C 0.1111(17) 0.4075(13) 0.1967(18) 0.050(4) Uani 0.646(2) 1 d . U P A 1
H2B1 H 0.0743 0.3589 0.2124 0.06 Uiso 0.646(2) 1 calc R U P A 1
H2B2 H 0.1382 0.412 0.1403 0.06 Uiso 0.646(2) 1 calc R U P A 1
C3B C 0.3412(8) 0.5026(6) 0.1368(6) 0.0281(2) Uani 0.646(2) 1 d . U P A 1
C4B C 0.3094(7) 0.4993(6) 0.0722(6) 0.0281(2) Uani 0.646(2) 1 d . U P A 1
H4B1 H 0.2619 0.5389 0.0797 0.042 Uiso 0.646(2) 1 calc R U P A 1
H4B2 H 0.2868 0.4459 0.0727 0.042 Uiso 0.646(2) 1 calc R U P A 1
H4B3 H 0.3594 0.5109 0.0231 0.042 Uiso 0.646(2) 1 calc R U P A 1
C5B C 0.4114(7) 0.4382(5) 0.1289(6) 0.0281(2) Uani 0.646(2) 1 d . U P A 1
H5B1 H 0.3827 0.3905 0.1599 0.042 Uiso 0.646(2) 1 calc R U P A 1
H5B2 H 0.4547 0.4579 0.1464 0.042 Uiso 0.646(2) 1 calc R U P A 1
H5B3 H 0.4419 0.4249 0.0754 0.042 Uiso 0.646(2) 1 calc R U P A 1
C6B C 0.3852(7) 0.5846(5) 0.1285(6) 0.0281(2) Uani 0.646(2) 1 d . U P A 1
H6B1 H 0.4343 0.5908 0.078 0.042 Uiso 0.646(2) 1 calc R U P A 1
H6B2 H 0.4081 0.5877 0.1677 0.042 Uiso 0.646(2) 1 calc R U P A 1
H6B3 H 0.3409 0.6271 0.1345 0.042 Uiso 0.646(2) 1 calc R U P A 1
C7B C 0.2732(8) 0.4753(6) 0.3086(6) 0.0281(2) Uani 0.646(2) 1 d . U P A 1
C8B C 0.3085(7) 0.3929(5) 0.3197(6) 0.0281(2) Uani 0.646(2) 1 d . U P A 1
H8B1 H 0.368 0.3852 0.2791 0.042 Uiso 0.646(2) 1 calc R U P A 1
H8B2 H 0.2684 0.3522 0.3178 0.042 Uiso 0.646(2) 1 calc R U P A 1
H8B3 H 0.3121 0.3884 0.3692 0.042 Uiso 0.646(2) 1 calc R U P A 1
C9B C 0.3327(7) 0.5409(5) 0.3123(6) 0.0281(2) Uani 0.646(2) 1 d . U P A 1
H9B1 H 0.3328 0.5392 0.3632 0.042 Uiso 0.646(2) 1 calc R U P A 1
H9B2 H 0.3101 0.5929 0.302 0.042 Uiso 0.646(2) 1 calc R U P A 1
H9B3 H 0.3935 0.5328 0.2741 0.042 Uiso 0.646(2) 1 calc R U P A 1
C10B C 0.1889(8) 0.4812(6) 0.3814(6) 0.0281(2) Uani 0.646(2) 1 d . U P A 1
H10A H 0.146 0.4417 0.3823 0.042 Uiso 0.646(2) 1 calc R U P A 1
H10B H 0.163 0.5348 0.3832 0.042 Uiso 0.646(2) 1 calc R U P A 1
H10C H 0.2034 0.4709 0.4255 0.042 Uiso 0.646(2) 1 calc R U P A 1
Pd1P Pd 0.10143(18) 0.58623(15) 0.27228(13) 0.0281(2) Uani 0.354(2) 1 d . . P A
2
P2P P 0.2134(4) 0.4942(3) 0.2708(3) 0.0281(2) Uani 0.354(2) 1 d . U P A 2
C1P C 0.173(2) 0.3971(19) 0.258(2) 0.050(4) Uani 0.354(2) 1 d . U P A 2
H1F H 0.2246 0.3619 0.2322 0.06 Uiso 0.354(2) 1 calc R U P A 2
H1G H 0.137 0.372 0.3087 0.06 Uiso 0.354(2) 1 calc R U P A 2
C2P C 0.116(3) 0.401(2) 0.212(4) 0.050(4) Uani 0.354(2) 1 d . U P A 2
H2P1 H 0.0795 0.3521 0.2246 0.06 Uiso 0.354(2) 1 calc R U P A 2
H2P2 H 0.1559 0.4014 0.1571 0.06 Uiso 0.354(2) 1 calc R U P A 2
C3P C 0.3268(13) 0.5058(10) 0.1880(11) 0.0281(2) Uani 0.354(2) 1 d . U P A 2
C4P C 0.3122(14) 0.5029(10) 0.1155(11) 0.0281(2) Uani 0.354(2) 1 d . U P A 2
H4P1 H 0.2723 0.5467 0.1134 0.042 Uiso 0.354(2) 1 calc R U P A 2
H4P2 H 0.2854 0.4518 0.1149 0.042 Uiso 0.354(2) 1 calc R U P A 2
H4P3 H 0.3694 0.5083 0.0712 0.042 Uiso 0.354(2) 1 calc R U P A 2
C5P C 0.4007(13) 0.4447(10) 0.1916(10) 0.0281(2) Uani 0.354(2) 1 d . U P A 2
H5P1 H 0.4072 0.401 0.1582 0.042 Uiso 0.354(2) 1 calc R U P A 2
H5P2 H 0.383 0.4232 0.2441 0.042 Uiso 0.354(2) 1 calc R U P A 2
H5P3 H 0.4577 0.4722 0.1749 0.042 Uiso 0.354(2) 1 calc R U P A 2
C6P C 0.3594(15) 0.5922(12) 0.1825(13) 0.0417(19) Uani 0.354(2) 1 d . U P A 2
H6P1 H 0.4193 0.5974 0.1416 0.063 Uiso 0.354(2) 1 calc R U P A 2
H6P2 H 0.3608 0.6047 0.231 0.063 Uiso 0.354(2) 1 calc R U P A 2
H6P3 H 0.3186 0.6293 0.1714 0.063 Uiso 0.354(2) 1 calc R U P A 2
C7P C 0.2362(17) 0.4764(13) 0.3531(15) 0.0417(19) Uani 0.354(2) 1 d . U P A 2
C8P C 0.2668(14) 0.3993(12) 0.3794(13) 0.0417(19) Uani 0.354(2) 1 d . U P A 2
H8P1 H 0.331 0.4016 0.3657 0.063 Uiso 0.354(2) 1 calc R U P A 2
H8P2 H 0.2544 0.3548 0.3547 0.063 Uiso 0.354(2) 1 calc R U P A 2
H8P3 H 0.235 0.3917 0.4348 0.063 Uiso 0.354(2) 1 calc R U P A 2
C9P C 0.2804(14) 0.5468(12) 0.3689(13) 0.0417(19) Uani 0.354(2) 1 d . U P A 2
H9P1 H 0.2485 0.56 0.4223 0.063 Uiso 0.354(2) 1 calc R U P A 2
H9P2 H 0.2787 0.5929 0.3359 0.063 Uiso 0.354(2) 1 calc R U P A 2
H9P3 H 0.3424 0.5331 0.3585 0.063 Uiso 0.354(2) 1 calc R U P A 2
C10P C 0.1351(15) 0.4801(13) 0.4257(13) 0.0417(19) Uani 0.354(2) 1 d . U P A 2
H10D H 0.104 0.43 0.4304 0.063 Uiso 0.354(2) 1 calc R U P A 2
H10E H 0.1007 0.5246 0.4159 0.063 Uiso 0.354(2) 1 calc R U P A 2
H10F H 0.1416 0.4878 0.4731 0.063 Uiso 0.354(2) 1 calc R U P A 2
C11B C -0.0617(6) 0.4589(5) 0.3166(5) 0.056(2) Uani 1 1 d . . . . .
C12B C -0.0284(8) 0.4200(6) 0.3723(6) 0.083(4) Uani 1 1 d . . . . .
H12D H -0.0783 0.3952 0.4154 0.125 Uiso 1 1 calc R U . . .
H12E H -0.0014 0.4603 0.3907 0.125 Uiso 1 1 calc R U . . .
H12F H 0.0162 0.3791 0.347 0.125 Uiso 1 1 calc R U . . .
C13B C -0.1212(7) 0.5313(5) 0.3523(5) 0.069(3) Uani 1 1 d . . . . .
H13D H -0.0857 0.5711 0.3623 0.104 Uiso 1 1 calc R U . . .
H13E H -0.1701 0.514 0.4003 0.104 Uiso 1 1 calc R U . . .
H13F H -0.1455 0.5547 0.3171 0.104 Uiso 1 1 calc R U . . .
C14B C -0.1167(7) 0.3958(6) 0.2982(7) 0.079(3) Uani 1 1 d . . . . .
H14D H -0.1665 0.3779 0.3453 0.118 Uiso 1 1 calc R U . . .
H14E H -0.0783 0.3501 0.2754 0.118 Uiso 1 1 calc R U . . .
H14F H -0.1397 0.42 0.2623 0.118 Uiso 1 1 calc R U . . .
C15B C 0.0116(6) 0.5154(5) 0.1475(5) 0.049(2) Uani 1 1 d . . . . .
C16B C -0.0660(6) 0.5762(5) 0.1668(5) 0.052(2) Uani 1 1 d . . . . .
H16D H -0.0749 0.5916 0.1206 0.078 Uiso 1 1 calc R U . . .
H16E H -0.0518 0.6236 0.1869 0.078 Uiso 1 1 calc R U . . .
H16F H -0.1205 0.5521 0.2052 0.078 Uiso 1 1 calc R U . . .
C17B C 0.0950(7) 0.5560(6) 0.0832(5) 0.063(3) Uani 1 1 d . . . . .
H17D H 0.1093 0.6042 0.1019 0.095 Uiso 1 1 calc R U . . .
H17E H 0.082 0.5703 0.0388 0.095 Uiso 1 1 calc R U . . .
H17F H 0.1458 0.5189 0.0686 0.095 Uiso 1 1 calc R U . . .
C18B C -0.0111(8) 0.4426(6) 0.1140(6) 0.075(3) Uani 1 1 d . . . . .
H18D H -0.0252 0.4603 0.0709 0.112 Uiso 1 1 calc R U . . .
H18E H -0.0626 0.4153 0.1533 0.112 Uiso 1 1 calc R U . . .
H18F H 0.04 0.4058 0.0966 0.112 Uiso 1 1 calc R U . . .
C19B C 0.1188(4) 0.9350(3) 0.2636(3) 0.0233(13) Uani 1 1 d . . . . .
H19C H 0.1737 0.9535 0.2665 0.028 Uiso 1 1 calc R U . . .
H19D H 0.0985 0.9778 0.2367 0.028 Uiso 1 1 calc R U . . .
C20B C 0.0464(4) 0.9217(4) 0.3452(3) 0.0231(13) Uani 1 1 d . . . . .
H20C H -0.0128 0.9255 0.3435 0.028 Uiso 1 1 calc R U . . .
H20D H 0.0499 0.9649 0.3767 0.028 Uiso 1 1 calc R U . . .
C21B C 0.1262(5) 0.8433(4) 0.4453(4) 0.0289(14) Uani 1 1 d . . . . .
C22B C 0.2076(4) 0.8898(4) 0.3901(4) 0.0341(16) Uani 1 1 d . . . . .
H22D H 0.2362 0.8614 0.3429 0.051 Uiso 1 1 calc R U . . .
H22E H 0.2499 0.8946 0.4134 0.051 Uiso 1 1 calc R U . . .
H22F H 0.1889 0.943 0.3786 0.051 Uiso 1 1 calc R U . . .
C23B C 0.1607(5) 0.7627(4) 0.4669(4) 0.0377(17) Uani 1 1 d . . . . .
H23D H 0.2092 0.7725 0.4821 0.057 Uiso 1 1 calc R U . . .
H23E H 0.1827 0.729 0.4229 0.057 Uiso 1 1 calc R U . . .
H23F H 0.112 0.7356 0.5093 0.057 Uiso 1 1 calc R U . . .
C24B C 0.0788(5) 0.8931(4) 0.5157(3) 0.0337(16) Uani 1 1 d . . . . .
H24D H 0.05 0.9397 0.502 0.051 Uiso 1 1 calc R U . . .
H24E H 0.1224 0.9109 0.5337 0.051 Uiso 1 1 calc R U . . .
H24F H 0.0337 0.8605 0.5561 0.051 Uiso 1 1 calc R U . . .
C25B C -0.0615(5) 0.8019(4) 0.4610(3) 0.0304(15) Uani 1 1 d . . . . .
C26B C -0.1136(5) 0.8750(5) 0.5039(4) 0.0388(17) Uani 1 1 d . . . . .
H26D H -0.1752 0.8599 0.536 0.058 Uiso 1 1 calc R U . . .
H26E H -0.1131 0.9178 0.467 0.058 Uiso 1 1 calc R U . . .
H26F H -0.0854 0.8937 0.5358 0.058 Uiso 1 1 calc R U . . .
C27B C -0.1096(5) 0.7717(4) 0.4150(4) 0.0339(16) Uani 1 1 d . . . . .
H27D H -0.1116 0.814 0.3786 0.051 Uiso 1 1 calc R U . . .
H27E H -0.1704 0.7566 0.4496 0.051 Uiso 1 1 calc R U . . .
H27F H -0.0777 0.7252 0.3875 0.051 Uiso 1 1 calc R U . . .
C28B C -0.0625(5) 0.7345(4) 0.5186(4) 0.0400(18) Uani 1 1 d . . . . .
H28D H -0.124 0.7175 0.5488 0.06 Uiso 1 1 calc R U . . .
H28E H -0.0373 0.7537 0.5525 0.06 Uiso 1 1 calc R U . . .
H28F H -0.027 0.6892 0.4914 0.06 Uiso 1 1 calc R U . . .
C29B C 0.0724(4) 0.8515(4) 0.1541(3) 0.0255(13) Uani 1 1 d . . . . .
C30B C 0.0772(5) 0.7734(4) 0.1153(4) 0.0290(14) Uani 1 1 d . . . . .
H30D H 0.037 0.7769 0.0893 0.044 Uiso 1 1 calc R U . . .
H30E H 0.0593 0.7291 0.1537 0.044 Uiso 1 1 calc R U . . .
H30F H 0.1383 0.7644 0.078 0.044 Uiso 1 1 calc R U . . .
C31B C -0.0232(5) 0.8616(5) 0.2133(4) 0.0359(16) Uani 1 1 d . . . . .
H31D H -0.0387 0.816 0.2504 0.054 Uiso 1 1 calc R U . . .
H31E H -0.064 0.8645 0.1879 0.054 Uiso 1 1 calc R U . . .
H31F H -0.0282 0.9109 0.2397 0.054 Uiso 1 1 calc R U . . .
C32B C 0.0923(5) 0.9227(4) 0.0962(4) 0.0328(15) Uani 1 1 d . . . . .
H32D H 0.0453 0.928 0.0775 0.049 Uiso 1 1 calc R U . . .
H32E H 0.1498 0.9141 0.0534 0.049 Uiso 1 1 calc R U . . .
H32F H 0.0946 0.9715 0.1208 0.049 Uiso 1 1 calc R U . . .
C33B C 0.2649(4) 0.8584(4) 0.1394(3) 0.0286(14) Uani 1 1 d . . . . .
C34B C 0.3212(5) 0.8435(5) 0.1863(4) 0.0364(16) Uani 1 1 d . . . . .
H34D H 0.3846 0.8469 0.1523 0.055 Uiso 1 1 calc R U . . .
H34E H 0.3086 0.7903 0.2118 0.055 Uiso 1 1 calc R U . . .
H34F H 0.3062 0.8838 0.2245 0.055 Uiso 1 1 calc R U . . .
C35B C 0.2916(5) 0.7946(4) 0.0789(4) 0.0329(15) Uani 1 1 d . . . . .
H35D H 0.263 0.744 0.1029 0.049 Uiso 1 1 calc R U . . .
H35E H 0.3564 0.7872 0.0567 0.049 Uiso 1 1 calc R U . . .
H35F H 0.2724 0.8122 0.0386 0.049 Uiso 1 1 calc R U . . .
C36B C 0.2886(5) 0.9422(4) 0.1009(4) 0.0356(16) Uani 1 1 d . . . . .
H36D H 0.3534 0.9484 0.0784 0.053 Uiso 1 1 calc R U . . .
H36E H 0.2609 0.9823 0.1388 0.053 Uiso 1 1 calc R U . . .
H36F H 0.2666 0.9492 0.0608 0.053 Uiso 1 1 calc R U . . .
P2 P 0.12800(13) 0.16466(10) 0.25443(10) 0.0310(4) Uani 1 1 d . . . . .
F7 F 0.2076(3) 0.1104(3) 0.2030(3) 0.0627(14) Uani 1 1 d . . . . .
F8 F 0.0640(4) 0.1180(3) 0.2311(3) 0.0699(16) Uani 1 1 d . . . . .
F9 F 0.0491(4) 0.2204(3) 0.3069(3) 0.0616(14) Uani 1 1 d . . . . .
F10 F 0.1924(4) 0.2129(3) 0.2791(4) 0.0835(18) Uani 1 1 d . . . . .
F11 F 0.1462(5) 0.2265(3) 0.1854(2) 0.0785(19) Uani 1 1 d . . . . .
F12 F 0.1108(4) 0.1033(2) 0.3243(2) 0.0596(15) Uani 1 1 d . . . . .
P1 P 0.6820(2) 0.44333(15) 0.16036(17) 0.0809(9) Uani 1 1 d D . . . .
F2 F 0.6014(6) 0.5060(4) 0.1718(5) 0.1248(13) Uani 1 1 d D . . . .
F3 F 0.7137(6) 0.4990(4) 0.2097(5) 0.1248(13) Uani 1 1 d . . . . .
F4 F 0.7589(6) 0.3829(4) 0.1561(5) 0.1248(13) Uani 1 1 d . . . . .
F1 F 0.6429(11) 0.3887(6) 0.1122(7) 0.1248(13) Uani 0.77(2) 1 d D U P B 1
F5 F 0.7414(9) 0.4924(6) 0.0850(7) 0.1248(13) Uani 0.77(2) 1 d D U P B 1
F6 F 0.6242(10) 0.3901(7) 0.2377(7) 0.1248(13) Uani 0.77(2) 1 d D U P B 1
F1P F 0.693(4) 0.3840(19) 0.0970(19) 0.1248(13) Uani 0.23(2) 1 d D U P B 2
F5P F 0.773(2) 0.486(2) 0.109(3) 0.1248(13) Uani 0.23(2) 1 d D U P B 2
F6P F 0.605(3) 0.415(2) 0.2410(17) 0.1248(13) Uani 0.23(2) 1 d D U P B 2
 
loop_
    _atom_site_aniso_label
    _atom_site_aniso_U_11
    _atom_site_aniso_U_22
    _atom_site_aniso_U_33
    _atom_site_aniso_U_23
    _atom_site_aniso_U_13
    _atom_site_aniso_U_12
Pd1A 0.0345(3) 0.0195(2) 0.0348(3) -0.0075(2) -0.0223(2) 0.0037(2)
Pd2A 0.0363(3) 0.0182(2) 0.0222(2) -0.00406(18) -0.0149(2) 0.0004(2)
P1A 0.0235(9) 0.0196(7) 0.0238(7) -0.0041(6) -0.0125(7) -0.0001(6)
P2A 0.0261(9) 0.0241(8) 0.0245(8) -0.0076(6) -0.0143(7) 0.0049(7)
P3A 0.0258(9) 0.0236(8) 0.0239(8) -0.0053(6) -0.0138(7) 0.0025(6)
P4A 0.0239(9) 0.0248(8) 0.0244(8) -0.0022(6) -0.0107(7) -0.0013(7)
C1A 0.021(3) 0.018(3) 0.024(3) -0.004(2) -0.007(3) -0.001(2)
C2A 0.034(4) 0.015(3) 0.030(3) 0.000(3) -0.009(3) -0.002(3)
C3A 0.030(4) 0.032(3) 0.017(3) -0.002(3) -0.006(3) 0.005(3)
C4A 0.041(4) 0.038(4) 0.039(4) -0.007(3) -0.028(3) 0.002(3)
C5A 0.034(4) 0.046(4) 0.033(4) 0.002(3) -0.016(3) -0.001(3)
C6A 0.028(4) 0.059(5) 0.032(4) -0.004(3) -0.013(3) -0.002(3)
C7A 0.022(4) 0.055(4) 0.023(3) -0.008(3) -0.008(3) 0.003(3)
C8A 0.037(4) 0.061(5) 0.029(3) -0.015(3) -0.007(3) 0.007(4)
C9A 0.026(4) 0.059(5) 0.040(4) -0.015(4) -0.016(3) 0.012(3)
C10A 0.030(4) 0.050(4) 0.035(4) -0.001(3) -0.005(3) -0.012(3)
C11A 0.025(4) 0.035(4) 0.028(3) -0.007(3) -0.013(3) -0.001(3)
C12A 0.043(5) 0.041(4) 0.045(4) 0.005(3) -0.029(4) 0.003(3)
C13A 0.034(4) 0.048(4) 0.042(4) -0.001(3) -0.022(3) -0.006(3)
C14A 0.045(5) 0.044(4) 0.032(3) -0.014(3) -0.022(3) 0.002(3)
C15A 0.036(4) 0.029(3) 0.036(3) 0.003(3) -0.023(3) 0.001(3)
C16A 0.040(4) 0.045(4) 0.029(3) 0.008(3) -0.014(3) -0.017(3)
C17A 0.028(4) 0.059(5) 0.037(4) 0.013(4) -0.014(3) -0.012(4)
C18A 0.027(4) 0.056(5) 0.016(3) -0.004(3) 0.002(3) 0.005(3)
C19A 0.024(4) 0.033(3) 0.034(3) 0.002(3) -0.014(3) -0.002(3)
C20A 0.035(4) 0.015(3) 0.038(3) -0.005(3) -0.018(3) -0.004(3)
C21A 0.030(4) 0.037(4) 0.031(3) -0.007(3) -0.013(3) 0.004(3)
C22A 0.035(4) 0.044(4) 0.025(3) 0.001(3) -0.007(3) -0.003(3)
C23A 0.035(5) 0.052(5) 0.054(5) -0.001(4) -0.022(4) -0.007(4)
C24A 0.037(5) 0.055(5) 0.031(4) -0.009(3) -0.006(3) 0.012(4)
C25A 0.040(4) 0.033(4) 0.032(3) -0.009(3) -0.026(3) 0.006(3)
C26A 0.064(6) 0.044(4) 0.051(4) -0.018(4) -0.044(4) 0.008(4)
C27A 0.051(5) 0.047(4) 0.032(4) -0.002(3) -0.022(4) 0.008(4)
C28A 0.049(5) 0.044(4) 0.041(4) -0.008(3) -0.029(4) 0.017(4)
C29A 0.025(4) 0.038(4) 0.032(3) -0.007(3) -0.003(3) -0.002(3)
C30A 0.057(6) 0.041(5) 0.083(7) -0.003(5) 0.034(5) 0.003(4)
C31A 0.050(6) 0.142(10) 0.022(4) -0.009(5) -0.011(4) -0.026(6)
C32A 0.051(5) 0.044(4) 0.033(4) -0.003(3) 0.002(4) -0.023(4)
C33A 0.027(4) 0.047(4) 0.035(4) -0.008(3) -0.018(3) -0.001(3)
C34A 0.091(8) 0.068(6) 0.074(6) -0.035(5) -0.062(6) 0.050(5)
C35A 0.059(6) 0.091(7) 0.040(4) -0.004(4) -0.030(4) -0.030(5)
C36A 0.043(5) 0.057(5) 0.021(3) -0.004(3) -0.015(3) -0.007(4)
Pd2B 0.0379(3) 0.0191(2) 0.0340(3) -0.0075(2) -0.0248(2) 0.0054(2)
P1B 0.0384(12) 0.0233(9) 0.0691(13) -0.0128(9) -0.0323(10) 0.0053(8)
P3B 0.0280(9) 0.0198(7) 0.0217(7) -0.0065(6) -0.0143(7) 0.0040(6)
P4B 0.0239(9) 0.0225(8) 0.0219(7) -0.0037(6) -0.0123(7) 0.0024(6)
Pd1B 0.0358(7) 0.0172(3) 0.0346(7) -0.0036(5) -0.0176(5) 0.0004(4)
P2B 0.0358(7) 0.0172(3) 0.0346(7) -0.0036(5) -0.0176(5) 0.0004(4)
C1B 0.044(4) 0.018(3) 0.105(11) -0.014(5) -0.048(6) 0.007(3)
C2B 0.044(4) 0.018(3) 0.105(11) -0.014(5) -0.048(6) 0.007(3)
C3B 0.0358(7) 0.0172(3) 0.0346(7) -0.0036(5) -0.0176(5) 0.0004(4)
C4B 0.0358(7) 0.0172(3) 0.0346(7) -0.0036(5) -0.0176(5) 0.0004(4)
C5B 0.0358(7) 0.0172(3) 0.0346(7) -0.0036(5) -0.0176(5) 0.0004(4)
C6B 0.0358(7) 0.0172(3) 0.0346(7) -0.0036(5) -0.0176(5) 0.0004(4)
C7B 0.0358(7) 0.0172(3) 0.0346(7) -0.0036(5) -0.0176(5) 0.0004(4)
C8B 0.0358(7) 0.0172(3) 0.0346(7) -0.0036(5) -0.0176(5) 0.0004(4)
C9B 0.0358(7) 0.0172(3) 0.0346(7) -0.0036(5) -0.0176(5) 0.0004(4)
C10B 0.0358(7) 0.0172(3) 0.0346(7) -0.0036(5) -0.0176(5) 0.0004(4)
Pd1P 0.0358(7) 0.0172(3) 0.0346(7) -0.0036(5) -0.0176(5) 0.0004(4)
P2P 0.0358(7) 0.0172(3) 0.0346(7) -0.0036(5) -0.0176(5) 0.0004(4)
C1P 0.044(4) 0.018(3) 0.105(11) -0.014(5) -0.048(6) 0.007(3)
C2P 0.044(4) 0.018(3) 0.105(11) -0.014(5) -0.048(6) 0.007(3)
C3P 0.0358(7) 0.0172(3) 0.0346(7) -0.0036(5) -0.0176(5) 0.0004(4)
C4P 0.0358(7) 0.0172(3) 0.0346(7) -0.0036(5) -0.0176(5) 0.0004(4)
C5P 0.0358(7) 0.0172(3) 0.0346(7) -0.0036(5) -0.0176(5) 0.0004(4)
C6P 0.030(5) 0.042(4) 0.050(4) -0.006(4) -0.013(4) 0.004(4)
C7P 0.030(5) 0.042(4) 0.050(4) -0.006(4) -0.013(4) 0.004(4)
C8P 0.030(5) 0.042(4) 0.050(4) -0.006(4) -0.013(4) 0.004(4)
C9P 0.030(5) 0.042(4) 0.050(4) -0.006(4) -0.013(4) 0.004(4)
C10P 0.030(5) 0.042(4) 0.050(4) -0.006(4) -0.013(4) 0.004(4)
C11B 0.052(6) 0.041(5) 0.077(6) 0.001(4) -0.028(5) 0.006(4)
C12B 0.114(10) 0.068(7) 0.061(6) 0.016(5) -0.034(6) 0.024(6)
C13B 0.078(7) 0.054(5) 0.054(5) 0.008(4) -0.008(5) 0.020(5)
C14B 0.045(6) 0.053(6) 0.135(10) 0.001(6) -0.033(6) -0.010(5)
C15B 0.061(6) 0.040(4) 0.056(5) -0.020(4) -0.032(4) 0.004(4)
C16B 0.057(6) 0.052(5) 0.060(5) -0.009(4) -0.036(5) 0.005(4)
C17B 0.073(7) 0.056(5) 0.054(5) -0.015(4) -0.019(5) 0.006(5)
C18B 0.102(9) 0.053(6) 0.096(7) -0.038(5) -0.065(7) 0.016(5)
C19B 0.032(4) 0.024(3) 0.014(3) -0.005(2) -0.010(3) -0.001(3)
C20B 0.021(3) 0.030(3) 0.019(3) -0.001(2) -0.009(2) 0.004(3)
C21B 0.036(4) 0.029(3) 0.030(3) -0.009(3) -0.022(3) 0.003(3)
C22B 0.026(4) 0.049(4) 0.034(3) -0.007(3) -0.017(3) -0.007(3)
C23B 0.045(5) 0.037(4) 0.047(4) -0.014(3) -0.035(4) 0.010(3)
C24B 0.043(4) 0.043(4) 0.025(3) -0.013(3) -0.023(3) 0.007(3)
C25B 0.030(4) 0.041(4) 0.021(3) 0.001(3) -0.011(3) 0.002(3)
C26B 0.022(4) 0.066(5) 0.025(3) -0.003(3) -0.007(3) 0.004(3)
C27B 0.022(4) 0.044(4) 0.034(3) 0.003(3) -0.010(3) -0.012(3)
C28B 0.035(4) 0.047(4) 0.031(4) 0.002(3) -0.007(3) -0.014(3)
C29B 0.027(4) 0.031(3) 0.016(3) -0.005(2) -0.007(3) 0.002(3)
C30B 0.034(4) 0.026(3) 0.034(3) 0.002(3) -0.021(3) -0.002(3)
C31B 0.025(4) 0.056(5) 0.031(3) -0.011(3) -0.016(3) 0.007(3)
C32B 0.037(4) 0.035(4) 0.032(3) 0.003(3) -0.020(3) -0.005(3)
C33B 0.027(4) 0.033(3) 0.025(3) -0.006(3) -0.010(3) 0.003(3)
C34B 0.022(4) 0.053(4) 0.039(4) -0.004(3) -0.017(3) 0.006(3)
C35B 0.036(4) 0.039(4) 0.025(3) -0.008(3) -0.013(3) 0.010(3)
C36B 0.038(4) 0.028(3) 0.034(4) -0.002(3) -0.008(3) -0.005(3)
P2 0.0416(11) 0.0208(8) 0.0261(8) -0.0036(6) -0.0093(8) 0.0035(7)
F7 0.062(3) 0.035(2) 0.061(3) -0.010(2) 0.006(3) 0.002(2)
F8 0.085(4) 0.037(3) 0.119(4) -0.010(3) -0.073(4) 0.008(2)
F9 0.070(4) 0.037(2) 0.051(3) -0.006(2) 0.002(2) 0.012(2)
F10 0.093(5) 0.039(3) 0.144(5) -0.026(3) -0.073(4) -0.001(3)
F11 0.146(6) 0.035(3) 0.036(2) -0.004(2) -0.019(3) 0.013(3)
F12 0.114(5) 0.028(2) 0.030(2) -0.0022(18) -0.023(3) 0.003(2)
P1 0.117(3) 0.0385(13) 0.0735(17) -0.0003(13) -0.0259(18) -0.0010(15)
F2 0.145(4) 0.0689(19) 0.158(3) -0.016(2) -0.059(3) 0.008(2)
F3 0.145(4) 0.0689(19) 0.158(3) -0.016(2) -0.059(3) 0.008(2)
F4 0.145(4) 0.0689(19) 0.158(3) -0.016(2) -0.059(3) 0.008(2)
F1 0.145(4) 0.0689(19) 0.158(3) -0.016(2) -0.059(3) 0.008(2)
F5 0.145(4) 0.0689(19) 0.158(3) -0.016(2) -0.059(3) 0.008(2)
F6 0.145(4) 0.0689(19) 0.158(3) -0.016(2) -0.059(3) 0.008(2)
F1P 0.145(4) 0.0689(19) 0.158(3) -0.016(2) -0.059(3) 0.008(2)
[truncated: 1,726,685 more chars]
